# Supplementary material for: DNAH10 mutation correlates with cisplatin sensitivity and tumor mutation burden in small-cell lung cancer
Source: PubMed Central journal article supplement (PMC7053592; doi:10.18632/aging.102683), 2020-01-20
Supplement: aging-12-102683-s007..pdf [file aging-12-102683-s007..pdf]

## **SUPPLEMENTARY TABLES**

Please browse Full Text version to see the data of Supplementary Tables 1–8

**Supplementary Table1 . Characteristics of 55 small cell lung cancer cell lines (SCLC) in GDSC database.**

**Supplementary Table 2. P-values of Wilcoxon signed rank test (two-tailed) between IC50 values of cisplatin and gene mutations in SCLC cell lines.**

**Supplementary Table 3. Univariate Cox regression analysis of overall survival (OS) in patients with SCLC.**

**Supplementary Table 4. DNAH10 mutations discovered in 110 human SCLC specimens (reported by George et al.) and GDSC-SCLC cell lines.**

**Supplementary Table 5. Sixty upregulated and 97 downregulated DEGs were observed in cisplatin-resistant GDSC-SCLC cell lines.**

**Supplementary Table 6. Score of single sample gene-set enrichment analysis (ssGSEA) of 55 GDSC-SCLC cell lines.**

**Supplementary Table 7. Mann-Whitney U test of the score of single sample gene-set enrichment analysis (ssGSEA) between DNAH10-mutated and wild-type DNAH10 cell lines.**

**Supplementary Table 8. Three other drugs sensitivity between DNAH10-mutated and wild-type DNAH10 cell lines.**
