# Supplementary material for: DNAH10 mutation correlates with cisplatin sensitivity and tumor mutation burden in small-cell lung cancer
Source: PubMed Central journal article supplement (PMC7053592; doi:10.18632/aging.102683), 2020-01-20
Supplement: aging-12-102683-s008..pdf [file aging-12-102683-s008..pdf]

SUPPLEMENTARY FIGURES

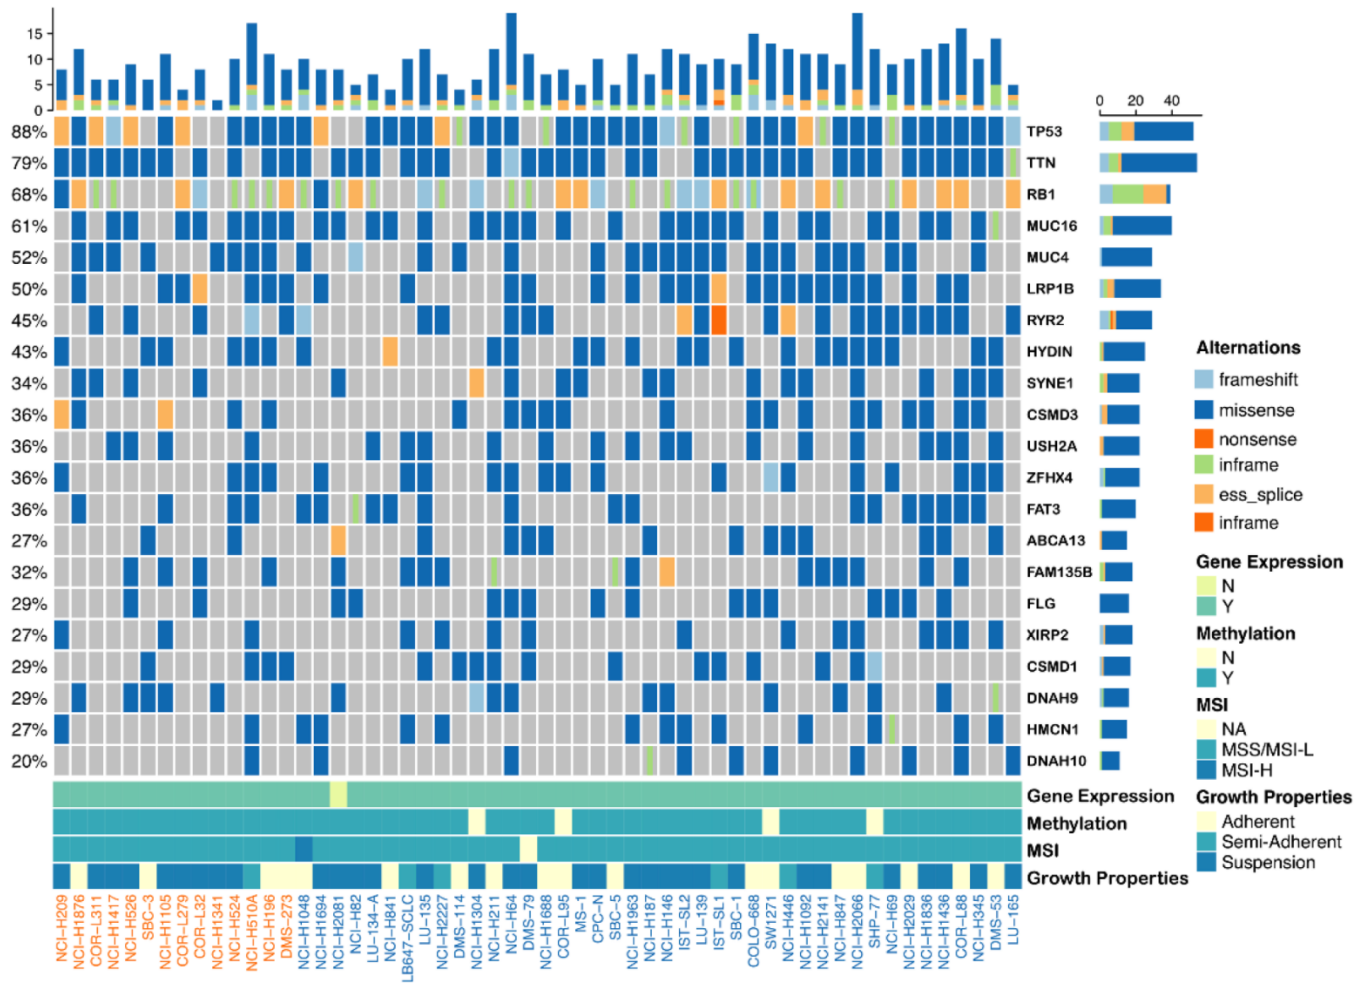

**Supplementary Figure 1. Genomic alterations in 56 SCLC cell lines arranged according to their sensitivity to cisplatin (from the most sensitive to resistant).** Alterations in the SCLC cell line genes are annotated for each sample according to the color panel below the image. Yellow represented cisplatin-sensitive SCLC cell lines, while blue represented cisplatin-resistant SCLC cell lines. Details of 56 cell lines are displayed in the bottom panel. SCLC: Small-cell lung cancer; MSI: Microsatellite instability; N: NO; Y: YES.

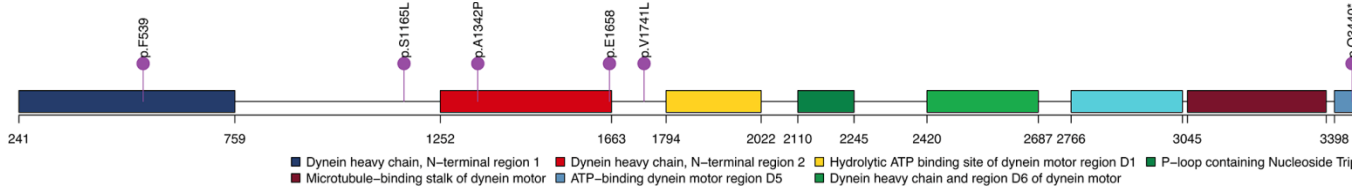

Supplementary Figure 2. Lollipop plot shows the distribution of DNAH10 mutations in patients (reported by George et al.).

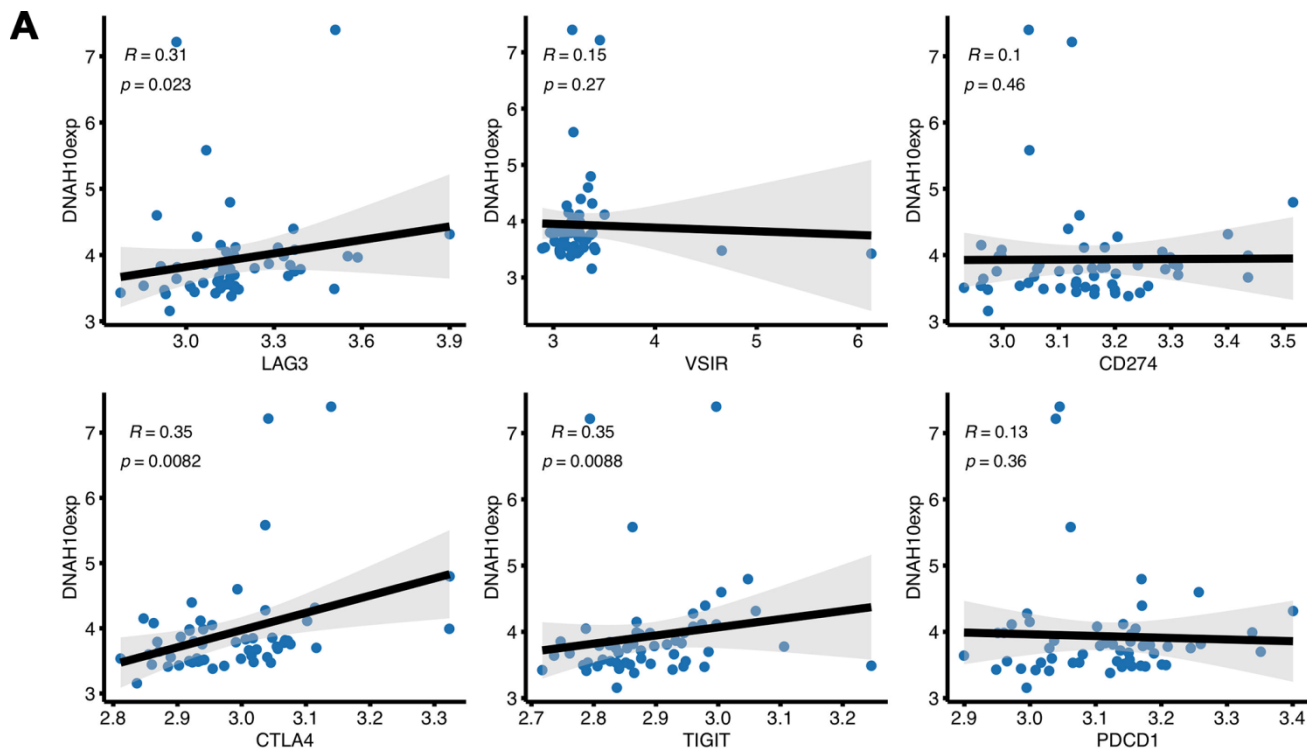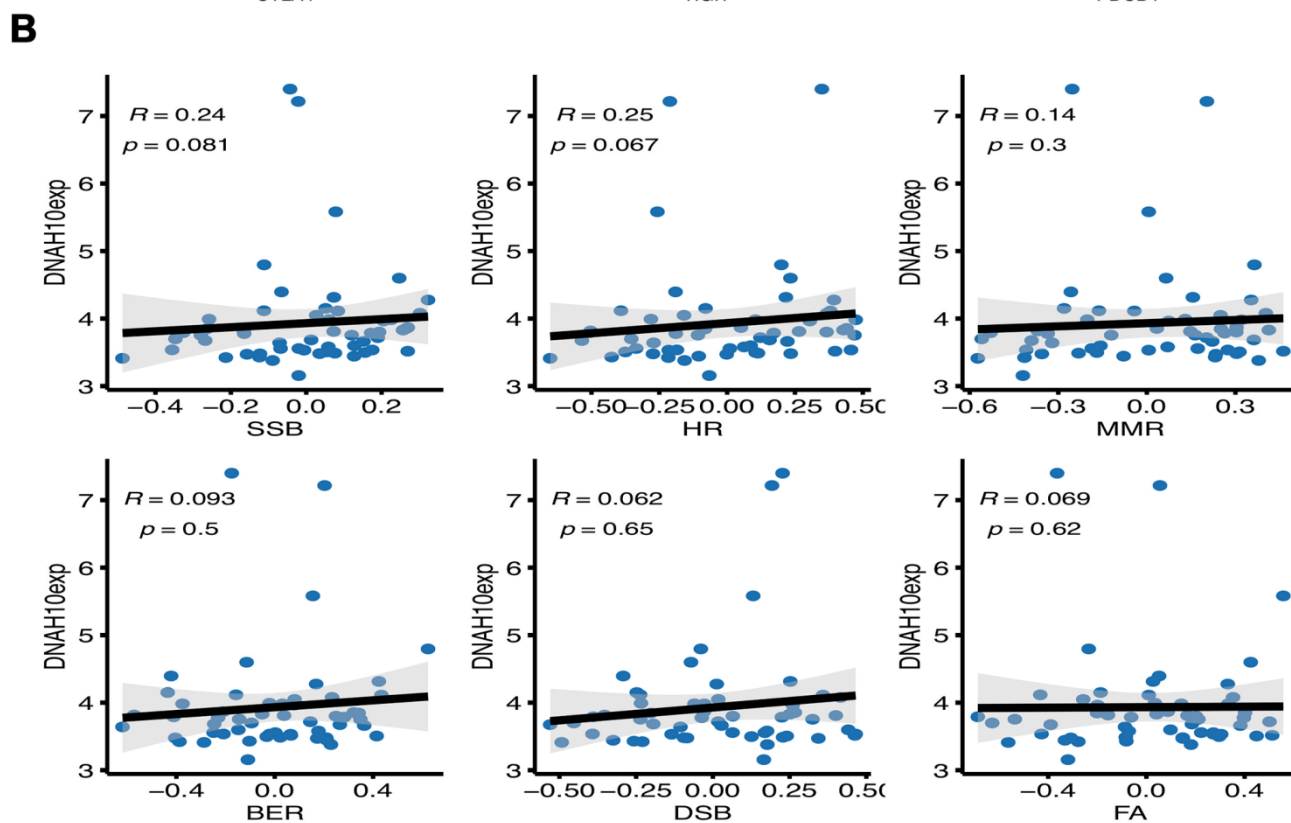

**Supplementary Figure 3. (A)** Correlation between DNAH10 expression and common immune checkpoints expression of 55 SCLC cell lines in the GDSC database. **(B)** Correlation between DNAH10 expression and ssGSEA ES of eight DDR-related pathways of 55 SCLC cell lines in the GDSC database. SCLC: Small-cell lung cancer; GDSC: The Genomics of Drug Sensitivity in Cancer Project; DDR: DNA damage response and repair; ssGSEA ES: ssGSEA: single sample gene-set enrichment analysis enrichment score

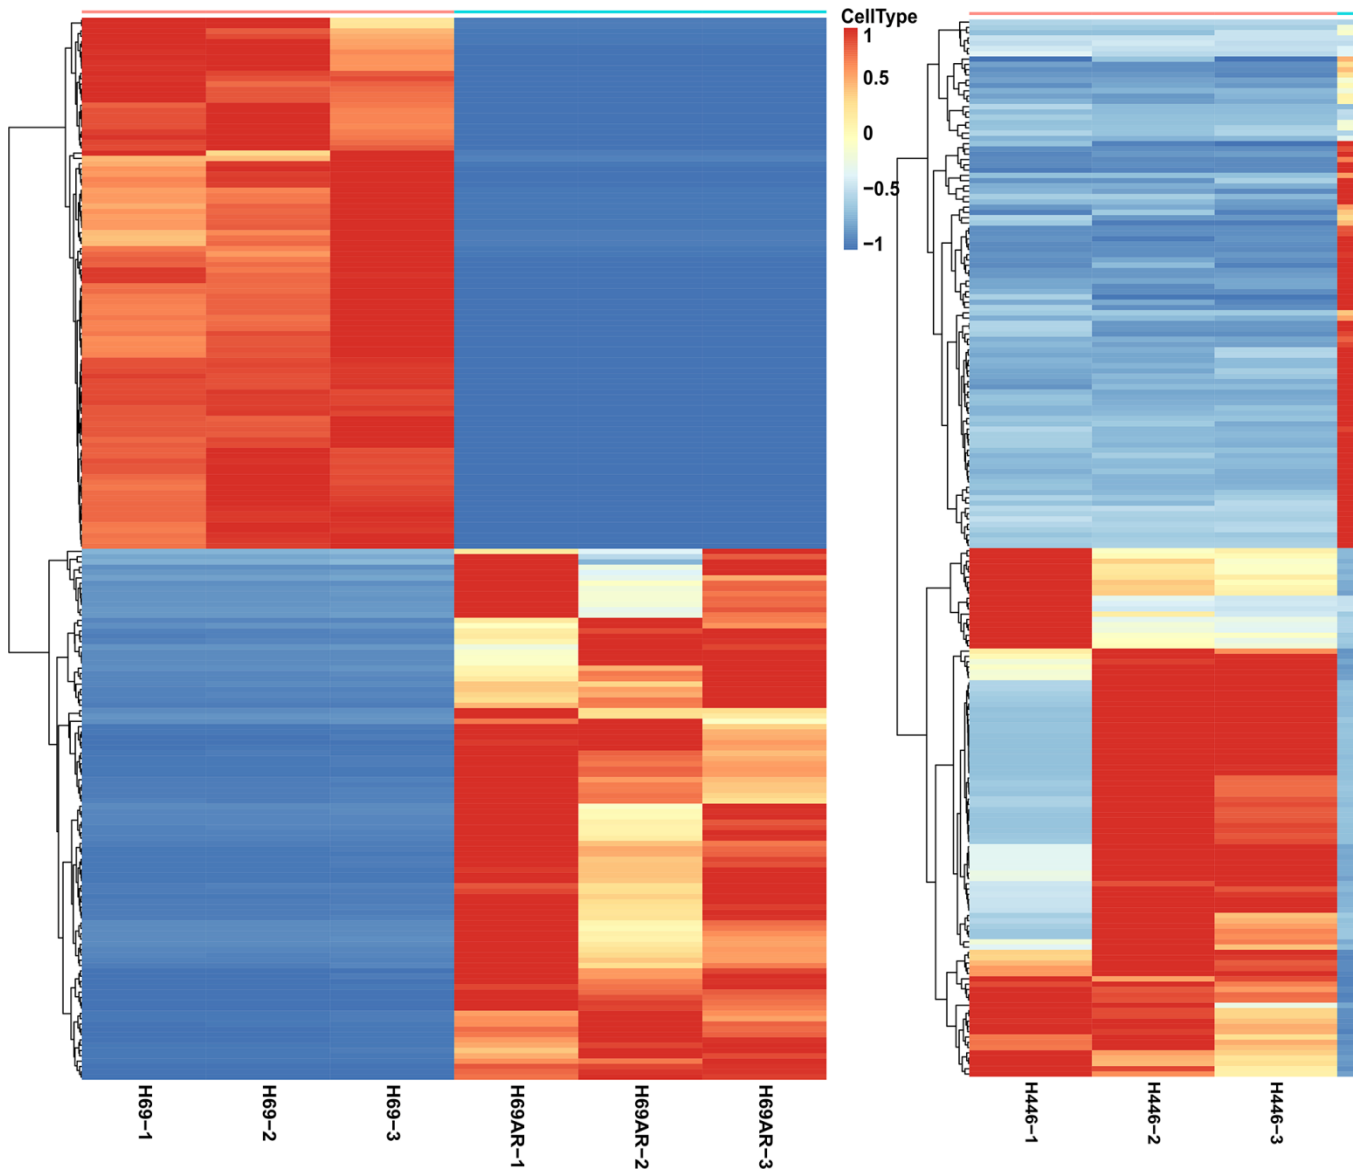

**Supplementary Figure 4.** (A) Heatmap of differentially expressed genes (DEG) in H69 cell lines. The columns show 6 SCLC cell lines including H69-1, H69-2, H69-3, H69AR-1, H69AR-2, and H69AR-3; while the rows show scaled expression ( $FC < 2/3$  or  $FC > 3/2$ ;  $P < 0.05$ ). (B) Heatmap of DEGs in H446 cell lines. The columns show six SCLC cell lines including H446-1, H446-2, H446-3, H446DDP-1, H446DDP-2, and H446DDP-3; while the rows show scaled expression ( $FC \geq 3/2$  or  $FC \leq 2/3$ ;  $P < 0.05$ ).
