# Supplementary material for: DNAH10 mutation correlates with cisplatin sensitivity and tumor mutation burden in small-cell lung cancer
Source: Aging (Albany NY). 2020 Jan 20;12(2):1285–303. doi: 10.18632/aging.102683 (PMC7053592; doi:10.18632/aging.102683)
Supplement: Supplementary Table 4 [file aging-12-102683-s001..xlsx]

## Sheet: Sheet1
Whole-genome sequencing of 110 human SCLC specimens.
Hugo_Symbol	Chromosome	Start_Position	End_Position	Strand	Consequence	Variant_Classification	Variant_Type	Reference_Allele	Tumor_Seq_Allele1	Tumor_Seq_Allele2	t_ref_count	t_alt_count	HGVSc	HGVSp	HGVSp_Short	Transcript_ID	RefSeq	Protein_position	Codons	Hotspot
DNAH10	12	124330361	124330361	+	missense_variant	Missense_Mutation	SNP	G	G	C	42	9	ENST00000409039.3:c.5221G>C	p.Val1741Leu	p.V1741L	ENST00000409039	NM_207437.3	1741	Gtt/Ctt	0
DNAH10	12	124420003	124420003	+	missense_variant	Missense_Mutation	SNP	T	T	A	40	44	ENST00000409039.3:c.13391T>A	p.Val4464Glu	p.V4464E	ENST00000409039	NM_207437.3	4464	gTa/gAa	0
DNAH10	12	124311432	124311432	+	missense_variant	Missense_Mutation	SNP	G	G	C	17	18	ENST00000409039.3:c.4024G>C	p.Ala1342Pro	p.A1342P	ENST00000409039	NM_207437.3	1342	Gca/Cca	0
DNAH10	12	124399496	124399496	+	stop_gained	Nonsense_Mutation	SNP	C	C	T	26	7	ENST00000409039.3:c.10318C>T	p.Gln3440Ter	p.Q3440*	ENST00000409039	NM_207437.3	3440	Cag/Tag	0
DNAH10	12	124303564	124303564	+	missense_variant	Missense_Mutation	SNP	C	C	T	23	10	ENST00000409039.3:c.3494C>T	p.Ser1165Leu	p.S1165L	ENST00000409039	NM_207437.3	1165	tCa/tTa	0
DNAH10	12	124315247	124315247	+	splice_donor_variant	Splice_Site	SNP	G	G	A	14	15	ENST00000409039.3:c.4191+1G>A		p.X1397_splice	ENST00000409039	NM_207437.3			0
DNAH10	12	124265636	124265636	+	missense_variant	Missense_Mutation	SNP	C	C	A	29	19	ENST00000409039.3:c.448C>A	p.Pro150Thr	p.P150T	ENST00000409039	NM_207437.3	150	Cca/Aca	0
Whole exome sequencing (Agilent SureSelectXT Human All Exon 50Mb bait set) of GDSC SCLC cell lines.
SAMPLE	COSMIC_ID	Cancer Type	Gene	Transcript	cDNA	AA	Classification	Gene_list	Recurrence Filter	Subs	Truncating	inframe
COR-L88	906808	SCLC	DNAH10	ENST00000409039	c.9791T>G	p.L3264R	missense	NA	NA	NA	NA	NA
COR-L88	906808	SCLC	DNAH10	ENST00000409039	c.1564G>T	p.D522Y	missense	NA	NA	1	NA	NA
IST-SL2	753565	SCLC	DNAH10	ENST00000409039	c.12350C>T	p.T4117I	missense	NA	NA	NA	NA	NA
LU-165	753589	SCLC	DNAH10	ENST00000409039	c.4633G>A	p.E1545K	missense	NA	NA	NA	NA	NA
NCI-H1694	688006	SCLC	DNAH10	ENST00000409039	c.8158G>A	p.D2720N	missense	NA	NA	NA	NA	NA
NCI-H187	688007	SCLC	DNAH10	ENST00000409039	c.6382C>T	p.Q2128*	nonsense	NA	Yes	NA	38	NA
NCI-H2029	688011	SCLC	DNAH10	ENST00000409039	c.7546C>T	p.R2516C	missense	NA	NA	NA	NA	NA
NCI-H2066	1330973	SCLC	DNAH10	ENST00000409039	c.8729C>T	p.P2910L	missense	NA	NA	NA	NA	NA
NCI-H510A	753605	SCLC	DNAH10	ENST00000409039	c.4840G>C	p.V1614L	missense	NA	NA	NA	NA	NA
NCI-H64	688026	SCLC	DNAH10	ENST00000409039	c.10234G>T	p.G3412C	missense	NA	NA	NA	NA	NA
NCI-H64	688026	SCLC	DNAH10	ENST00000409039	c.10233G>C	p.Q3411H	missense	NA	NA	NA	NA	NA
SBC-1	713885	SCLC	DNAH10	ENST00000409039	c.8208G>T	p.M2736I	missense	NA	NA	NA	NA	NA
SW1271	1299062	SCLC	DNAH10	ENST00000409039	c.2396C>A	p.P799Q	missense	NA	NA	1	NA	NA
