# Supplementary material for: DNAH10 mutation correlates with cisplatin sensitivity and tumor mutation burden in small-cell lung cancer
Source: Aging (Albany NY). 2020 Jan 20;12(2):1285–303. doi: 10.18632/aging.102683 (PMC7053592; doi:10.18632/aging.102683)
Supplement: Supplementary Table 5 [file aging-12-102683-s009..xlsx]

## Sheet: Suppl Table 5
	logFC	AveExpr	t	P.Value	adj.P.Val	B	change	Gene
THBD	-0.600614	3.44748	-4.52365	3.31889e-05	0.573538	-1.1089	DOWN	THBD
ADNP2	0.637075	7.88021	4.01174	0.000184816	0.926499	-1.77296	UP	ADNP2
MYRFL	-0.610526	3.45946	-3.97932	0.00020543	0.926499	-1.8144	DOWN	MYRFL
FBXO3	-0.592962	5.79817	-3.95018	0.000225836	0.926499	-1.85155	DOWN	FBXO3
KLHL36	-0.929617	4.66304	-3.89718	0.000268069	0.926499	-1.91893	DOWN	KLHL36
OTUD6B	-0.52002	4.57586	-3.57537	0.000741055	0.995998	-2.32139	NOT	OTUD6B
PCDHB4	-0.897246	3.40518	-3.57462	0.000742757	0.995998	-2.3223	DOWN	PCDHB4
ASMTL	1.27651	5.44712	3.53946	0.000827834	0.995998	-2.36548	UP	ASMTL
SLC6A8	1.13499	6.29401	3.51425	0.000894474	0.995998	-2.39634	UP	SLC6A8
THAP6	-0.344929	4.68815	-3.41064	0.00122579	0.995998	-2.52213	NOT	THAP6
CALML3	-1.45977	3.76187	-3.38611	0.00131979	0.995998	-2.55167	DOWN	CALML3
CACNA1S	-0.264405	3.27384	-3.38268	0.00133346	0.995998	-2.55579	NOT	CACNA1S
LCT	-0.490443	3.10346	-3.362	0.00141882	0.995998	-2.58062	NOT	LCT
CARD19	-0.821181	6.99771	-3.3609	0.00142348	0.995998	-2.58193	DOWN	CARD19
DCAF17	-0.200112	3.17125	-3.342	0.00150622	0.995998	-2.60454	NOT	DCAF17
CNGA1	-0.148225	2.97038	-3.33279	0.0015482	0.995998	-2.61555	NOT	CNGA1
TLR1	-0.41776	2.87866	-3.32298	0.00159411	0.995998	-2.62725	NOT	TLR1
HTR2B	-0.633193	3.10686	-3.32046	0.00160607	0.995998	-2.63024	DOWN	HTR2B
CKAP2L	-0.830164	6.58402	-3.2671	0.00188111	0.995998	-2.69359	DOWN	CKAP2L
CALR	0.703617	4.26776	3.25902	0.00192645	0.995998	-2.70314	UP	CALR
PIGG	-0.261219	3.76272	-3.23436	0.00207123	0.995998	-2.7322	NOT	PIGG
THAP9	-0.797577	5.38975	-3.22439	0.00213262	0.995998	-2.74391	DOWN	THAP9
ME2	0.667161	8.51582	3.21248	0.00220826	0.995998	-2.7579	UP	ME2
ACTL10	-0.443894	3.73781	-3.18826	0.00236983	0.995998	-2.78624	NOT	ACTL10
MOSPD1	-0.665138	6.14255	-3.1782	0.00244022	0.995998	-2.79799	DOWN	MOSPD1
FREM2	1.67762	5.24902	3.16762	0.00251627	0.995998	-2.81031	UP	FREM2
EPB41L4A	-0.860221	3.96547	-3.15684	0.00259606	0.995998	-2.82285	DOWN	EPB41L4A
DYM	0.727678	7.29292	3.12775	0.0028235	0.995998	-2.85658	UP	DYM
SPTLC1	-0.36474	5.73048	-3.12415	0.0028529	0.995998	-2.86074	NOT	SPTLC1
ELMOD2	-0.459705	6.66598	-3.10922	0.00297796	0.995998	-2.87798	NOT	ELMOD2
ST3GAL4	0.678413	4.74433	3.10829	0.00298592	0.995998	-2.87905	UP	ST3GAL4
INPP5B	-0.498651	4.01172	-3.10376	0.003025	0.995998	-2.88427	NOT	INPP5B
GPRC5A	-0.761589	3.28298	-3.10085	0.00305029	0.995998	-2.88762	DOWN	GPRC5A
HIP1	0.306427	3.73358	3.09818	0.00307371	0.995998	-2.89069	NOT	HIP1
GRAMD1C	-0.516735	3.73976	-3.08508	0.00319112	0.995998	-2.90576	NOT	GRAMD1C
G3BP2	-0.506964	7.559	-3.08277	0.00321226	0.995998	-2.90841	NOT	G3BP2
FOPNL	-0.480346	6.84608	-3.07813	0.00325504	0.995998	-2.91373	NOT	FOPNL
HIST1H4H	-0.571864	3.14814	-3.07404	0.00329324	0.995998	-2.91842	NOT	HIST1H4H
MAP3K14	-0.32627	3.81376	-3.07054	0.00332627	0.995998	-2.92243	NOT	MAP3K14
C1QTNF9B	-0.210176	2.80328	-3.06841	0.00334655	0.995998	-2.92487	NOT	C1QTNF9B
TUT7	-0.416643	3.8759	-3.057	0.00345699	0.995998	-2.93792	NOT	TUT7
TXK	-0.301995	3.04807	-3.04666	0.00355998	0.995998	-2.94972	NOT	TXK
GOLGA1	-0.339796	4.02875	-3.04104	0.00361717	0.995998	-2.95613	NOT	GOLGA1
NARS	0.550464	9.77052	3.02903	0.00374224	0.995998	-2.9698	NOT	NARS
CSPG4	0.162364	3.22317	3.01047	0.00394358	0.995998	-2.99087	NOT	CSPG4
RNF141	-0.421858	4.69294	-3.00997	0.00394909	0.995998	-2.99143	NOT	RNF141
CEP70	-0.475363	6.5206	-3.00945	0.00395491	0.995998	-2.99202	NOT	CEP70
PEX6	0.613979	4.19903	3.0071	0.00398122	0.995998	-2.99469	UP	PEX6
OR5T2	-0.150863	2.95862	-3.00626	0.00399063	0.995998	-2.99564	NOT	OR5T2
BTBD6	0.885062	8.69159	2.99518	0.00411693	0.995998	-3.00816	UP	BTBD6
NLGN3	0.146972	3.3406	2.99342	0.00413734	0.995998	-3.01015	NOT	NLGN3
ATP6V1F	0.383757	10.0792	2.99069	0.00416912	0.995998	-3.01323	NOT	ATP6V1F
CTSB	0.965995	7.39216	2.9885	0.00419486	0.995998	-3.0157	UP	CTSB
TTC7A	-0.251897	4.09945	-2.98733	0.00420871	0.995998	-3.01703	NOT	TTC7A
ZDHHC8	0.222437	3.5268	2.9749	0.00435791	0.995998	-3.03104	NOT	ZDHHC8
ADGRF4	-0.161618	3.31432	-2.96683	0.00445735	0.995998	-3.04011	NOT	ADGRF4
CENPA	-0.6849	7.75246	-2.9654	0.00447517	0.995998	-3.04172	DOWN	CENPA
TXNL4A	0.484665	5.5013	2.96122	0.00452775	0.995998	-3.04641	NOT	TXNL4A
ALDH3B1	-0.56365	4.2392	-2.95752	0.00457478	0.995998	-3.05057	NOT	ALDH3B1
AKAP17A	0.280995	3.93291	2.95535	0.0046025	0.995998	-3.053	NOT	AKAP17A
WDR11	0.522245	6.72506	2.94889	0.00468605	0.995998	-3.06023	NOT	WDR11
REN	-0.287171	2.94797	-2.94427	0.00474676	0.995998	-3.06541	NOT	REN
ARHGEF1	0.246233	3.55367	2.92284	0.00503771	0.995998	-3.08934	NOT	ARHGEF1
LOC100505585	0.246233	3.55367	2.92284	0.00503771	0.995998	-3.08934	NOT	LOC100505585
CMYA5	-0.372772	3.40501	-2.90688	0.00526514	0.995998	-3.1071	NOT	CMYA5
GEN1	-0.434135	4.74866	-2.90348	0.0053148	0.995998	-3.11087	NOT	GEN1
TXNL1	0.426565	10.7618	2.89839	0.00539002	0.995998	-3.11652	NOT	TXNL1
DYDC2	-0.373583	3.26302	-2.89588	0.00542747	0.995998	-3.11931	NOT	DYDC2
RASGRF1	-0.141067	3.15753	-2.89187	0.00548778	0.995998	-3.12375	NOT	RASGRF1
ST8SIA4	-0.261148	3.18223	-2.89096	0.00550145	0.995998	-3.12475	NOT	ST8SIA4
CASP9	-0.693239	5.33902	-2.88998	0.00551634	0.995998	-3.12584	DOWN	CASP9
MUC15	-1.59087	4.23476	-2.88899	0.00553134	0.995998	-3.12693	DOWN	MUC15
ZNF415	1.51759	4.63053	2.8887	0.00553583	0.995998	-3.12726	UP	ZNF415
ESD	0.984533	10.1467	2.88772	0.00555071	0.995998	-3.12834	UP	ESD
PACRGL	-0.683322	5.12112	-2.87877	0.00568904	0.995998	-3.13824	DOWN	PACRGL
HJURP	-0.598823	8.20252	-2.87192	0.00579696	0.995998	-3.14579	DOWN	HJURP
BFSP1	-0.654416	3.50351	-2.87124	0.00580775	0.995998	-3.14654	DOWN	BFSP1
BRMS1L	-0.615648	5.43997	-2.86616	0.00588925	0.995998	-3.15215	DOWN	BRMS1L
PRB3	-0.542611	3.39273	-2.86613	0.00588972	0.995998	-3.15218	NOT	PRB3
TACR2	-0.434088	2.96436	-2.86593	0.00589293	0.995998	-3.1524	NOT	TACR2
HERC5	-1.5142	4.88873	-2.86437	0.00591814	0.995998	-3.15411	DOWN	HERC5
TDP2	-0.523025	7.00039	-2.86137	0.00596695	0.995998	-3.15742	NOT	TDP2
CCDC110	-0.577789	3.24297	-2.85688	0.00604074	0.995998	-3.16236	NOT	CCDC110
MAPK8	-0.46382	4.63529	-2.85471	0.00607669	0.995998	-3.16474	NOT	MAPK8
VN1R5	-0.176461	3.52622	-2.85296	0.00610582	0.995998	-3.16667	NOT	VN1R5
TRMO	-0.571552	5.65022	-2.85283	0.00610795	0.995998	-3.16681	NOT	TRMO
LIPH	-0.570033	3.12166	-2.84301	0.00627388	0.995998	-3.17759	NOT	LIPH
CALB2	-1.13797	4.1703	-2.82842	0.00652823	0.995998	-3.19356	DOWN	CALB2
AFTPH	-0.557553	6.60105	-2.81813	0.00671321	0.995998	-3.2048	NOT	AFTPH
ATF5	1.56802	6.77203	2.81476	0.00677475	0.995998	-3.20847	UP	ATF5
SLC7A1	0.531828	5.62097	2.8096	0.00687015	0.995998	-3.21409	NOT	SLC7A1
AJAP1	-0.612495	3.23261	-2.79774	0.00709414	0.995998	-3.22699	DOWN	AJAP1
SLCO4C1	-0.417994	3.17065	-2.79344	0.00717685	0.995998	-3.23164	NOT	SLCO4C1
NUBPL	-0.544401	4.5231	-2.79121	0.00722021	0.995998	-3.23407	NOT	NUBPL
GJB7	-0.217465	2.68777	-2.78425	0.00735697	0.995998	-3.24161	NOT	GJB7
MCMBP	0.471853	8.23473	2.78325	0.00737688	0.995998	-3.24269	NOT	MCMBP
PIANP	0.189265	3.08528	2.78105	0.00742073	0.995998	-3.24508	NOT	PIANP
MTPN	0.456789	7.96382	2.77974	0.00744694	0.995998	-3.24649	NOT	MTPN
NT5C1A	0.121095	2.9828	2.77896	0.00746249	0.995998	-3.24733	NOT	NT5C1A
KDM5C	0.25205	4.34488	2.77733	0.00749527	0.995998	-3.24909	NOT	KDM5C
SIGMAR1	0.542707	6.21746	2.77488	0.00754488	0.995998	-3.25174	NOT	SIGMAR1
PDZRN3	1.23755	4.76976	2.77445	0.00755351	0.995998	-3.2522	UP	PDZRN3
INTS7	0.501489	7.39012	2.76644	0.00771791	0.995998	-3.26086	NOT	INTS7
KCNS3	-1.4657	5.41232	-2.76445	0.00775912	0.995998	-3.263	DOWN	KCNS3
DNM1	1.01252	6.26146	2.76379	0.00777288	0.995998	-3.26371	UP	DNM1
CFAP47	-0.162292	3.24184	-2.76174	0.0078158	0.995998	-3.26592	NOT	CFAP47
PPDPFL	-0.462475	3.26286	-2.7613	0.00782495	0.995998	-3.26639	NOT	PPDPFL
PRDM15	-0.335697	4.01791	-2.75912	0.00787083	0.995998	-3.26874	NOT	PRDM15
EAPP	-0.471405	8.05397	-2.74594	0.00815324	0.995998	-3.28291	NOT	EAPP
XPNPEP1	0.543668	5.93214	2.74523	0.00816882	0.995998	-3.28367	NOT	XPNPEP1
GDF9	-0.355972	3.31216	-2.74253	0.00822786	0.995998	-3.28657	NOT	GDF9
MCM5	0.273562	3.93528	2.73956	0.00829334	0.995998	-3.28975	NOT	MCM5
ZNF329	0.761517	5.21854	2.73169	0.0084692	0.995998	-3.29818	UP	ZNF329
ARRDC1	-0.66322	4.28813	-2.73004	0.00850658	0.995998	-3.29995	DOWN	ARRDC1
SMAGP	-0.735057	3.43252	-2.72549	0.00861019	0.995998	-3.30481	DOWN	SMAGP
PHGDH	1.13135	10.1388	2.71805	0.00878216	0.995998	-3.31276	UP	PHGDH
EIF2S2	0.629502	7.04296	2.71775	0.00878912	0.995998	-3.31307	UP	EIF2S2
ZDHHC11	-0.518793	3.57345	-2.71637	0.00882142	0.995998	-3.31455	NOT	ZDHHC11
PLEKHA6	-0.61276	3.58649	-2.71566	0.00883803	0.995998	-3.3153	DOWN	PLEKHA6
PYURF	-0.479408	7.97202	-2.71461	0.0088626	0.995998	-3.31642	NOT	PYURF
NKRF	0.533283	7.31578	2.71331	0.00889341	0.995998	-3.31781	NOT	NKRF
FECH	0.668292	5.48368	2.71183	0.00892817	0.995998	-3.31938	UP	FECH
CATSPER3	-0.311276	3.28114	-2.70636	0.00905873	0.995998	-3.32521	NOT	CATSPER3
C19orf33	-1.28059	3.56381	-2.69736	0.00927705	0.995998	-3.33477	DOWN	C19orf33
OSGIN2	-0.492553	5.21852	-2.69717	0.0092816	0.995998	-3.33497	NOT	OSGIN2
DDX17	0.32175	7.56471	2.69683	0.00929006	0.995998	-3.33533	NOT	DDX17
NUP54	-0.391034	8.84575	-2.69418	0.0093554	0.995998	-3.33815	NOT	NUP54
MYH10	0.72014	6.9791	2.69414	0.00935616	0.995998	-3.33818	UP	MYH10
PUM2	-0.340692	7.20705	-2.69273	0.00939112	0.995998	-3.33968	NOT	PUM2
WDR82	0.417306	7.39682	2.68853	0.00949597	0.995998	-3.34414	NOT	WDR82
AUH	-0.498887	5.67746	-2.68726	0.00952775	0.995998	-3.34548	NOT	AUH
TXN2	0.427497	7.7011	2.68536	0.0095757	0.995998	-3.34749	NOT	TXN2
USP38	-0.332615	4.99833	-2.68513	0.00958136	0.995998	-3.34773	NOT	USP38
CNTNAP1	0.405205	3.73551	2.6845	0.00959742	0.995998	-3.3484	NOT	CNTNAP1
PF4	0.143954	2.99093	2.68133	0.0096779	0.995998	-3.35175	NOT	PF4
FAM177A1	-0.621462	7.62047	-2.67945	0.00972603	0.995998	-3.35375	DOWN	FAM177A1
LOC101927178	-0.621462	7.62047	-2.67945	0.00972603	0.995998	-3.35375	DOWN	LOC101927178
WNT5A	-0.332183	3.33447	-2.67904	0.00973645	0.995998	-3.35418	NOT	WNT5A
ZNF430	-0.60935	5.47154	-2.67877	0.00974346	0.995998	-3.35446	DOWN	ZNF430
TM4SF20	-0.480648	3.39978	-2.67627	0.00980761	0.995998	-3.3571	NOT	TM4SF20
PRRT2	0.502102	4.13834	2.67453	0.00985272	0.995998	-3.35894	NOT	PRRT2
IL1RAPL1	-0.192445	3.15802	-2.67381	0.00987124	0.995998	-3.35969	NOT	IL1RAPL1
SSUH2	-0.142493	3.22147	-2.67326	0.00988558	0.995998	-3.36028	NOT	SSUH2
JKAMP	-0.471177	7.42774	-2.67256	0.00990381	0.995998	-3.36102	NOT	JKAMP
UBE3A	0.449869	8.93077	2.66897	0.0099978	0.995998	-3.36481	NOT	UBE3A
TOR4A	-0.676435	3.44754	-2.66821	0.0100177	0.995998	-3.36561	DOWN	TOR4A
OR5H1	0.149574	3.11812	2.66482	0.0101074	0.995998	-3.36918	NOT	OR5H1
BUB3	0.548913	9.15322	2.66472	0.01011	0.995998	-3.36929	NOT	BUB3
PQLC1	0.327598	4.50611	2.66385	0.010133	0.995998	-3.3702	NOT	PQLC1
UNC93B1	-0.270487	3.23724	-2.66063	0.010219	0.995998	-3.37359	NOT	UNC93B1
2019-03-01	-0.585939	3.66075	-2.65225	0.0104459	0.995998	-3.3824	DOWN	2019-03-01
MAEA	-0.459044	7.33738	-2.65112	0.0104767	0.995998	-3.38358	NOT	MAEA
ADO	0.377014	7.55997	2.65091	0.0104825	0.995998	-3.3838	NOT	ADO
DUSP21	-0.188088	3.40993	-2.65064	0.0104899	0.995998	-3.38409	NOT	DUSP21
ST8SIA6	-0.137129	2.90735	-2.64726	0.010583	0.995998	-3.38763	NOT	ST8SIA6
UBIAD1	-0.435007	5.54996	-2.64482	0.0106506	0.995998	-3.39019	NOT	UBIAD1
NLN	-0.534608	5.66912	-2.63762	0.010853	0.995998	-3.39774	NOT	NLN
HIST1H2AG	-0.447838	3.29115	-2.63713	0.0108667	0.995998	-3.39824	NOT	HIST1H2AG
TTC36	-0.172166	3.47994	-2.63688	0.0108738	0.995998	-3.39851	NOT	TTC36
DAW1	-0.126068	3.26431	-2.63483	0.0109322	0.995998	-3.40065	NOT	DAW1
SNIP1	-0.626744	5.09369	-2.63271	0.0109926	0.995998	-3.40286	DOWN	SNIP1
IL31	-0.258026	2.96528	-2.63169	0.011022	0.995998	-3.40394	NOT	IL31
PXN	-0.279546	3.64926	-2.63057	0.011054	0.995998	-3.4051	NOT	PXN
TC2N	-1.02175	4.28876	-2.63047	0.0110572	0.995998	-3.40521	DOWN	TC2N
BST1	-0.204754	3.06978	-2.62993	0.0110727	0.995998	-3.40578	NOT	BST1
RETREG2	-0.374972	7.02757	-2.62513	0.0112118	0.995998	-3.41078	NOT	RETREG2
TMEM128	-0.374048	6.93327	-2.62133	0.0113232	0.995998	-3.41475	NOT	TMEM128
NIPSNAP3A	-0.629822	8.6164	-2.62003	0.0113615	0.995998	-3.4161	DOWN	NIPSNAP3A
PUM1	0.395716	9.1162	2.61364	0.0115514	0.995998	-3.42275	NOT	PUM1
CRLF2	0.163418	2.90951	2.61248	0.0115865	0.995998	-3.42396	NOT	CRLF2
ISL2	0.755831	3.72559	2.61245	0.0115873	0.995998	-3.42399	UP	ISL2
PSORS1C2	-0.155382	3.42897	-2.60948	0.0116769	0.995998	-3.42708	NOT	PSORS1C2
NUDT16P1	-0.216314	3.1589	-2.60479	0.0118196	0.995998	-3.43195	NOT	NUDT16P1
FAM214A	-0.623936	5.50026	-2.60448	0.011829	0.995998	-3.43227	DOWN	FAM214A
CCT6B	-0.493565	4.07947	-2.60325	0.0118669	0.995998	-3.43355	NOT	CCT6B
PLLP	-1.21503	4.64197	-2.603	0.0118743	0.995998	-3.4338	DOWN	PLLP
SETD4	-0.346204	5.27444	-2.60251	0.0118895	0.995998	-3.43431	NOT	SETD4
CNIH2	0.238793	3.99819	2.59261	0.0121978	0.995998	-3.44457	NOT	CNIH2
KRTAP1-3	-0.131082	2.76535	-2.5925	0.012201	0.995998	-3.44468	NOT	KRTAP1-3
TCP11L1	-0.139374	3.44439	-2.59241	0.0122038	0.995998	-3.44477	NOT	TCP11L1
SMAD4	0.510385	6.90489	2.58965	0.0122913	0.995998	-3.44763	NOT	SMAD4
VSIR	-0.376509	3.28353	-2.58832	0.0123334	0.995998	-3.449	NOT	VSIR
PCDH1	-0.221879	3.4844	-2.58346	0.0124889	0.995998	-3.45403	NOT	PCDH1
AADAC	-0.510261	3.13079	-2.5807	0.0125782	0.995998	-3.45688	NOT	AADAC
NUTF2	0.566052	5.34573	2.57989	0.0126043	0.995998	-3.45771	NOT	NUTF2
CFLAR	-0.562368	4.77809	-2.57814	0.0126613	0.995998	-3.45952	NOT	CFLAR
NSMCE4A	0.380674	8.57074	2.5767	0.0127082	0.995998	-3.461	NOT	NSMCE4A
UNC5B	0.401545	3.96589	2.57456	0.0127784	0.995998	-3.4632	NOT	UNC5B
COG7	-0.475797	5.07156	-2.57191	0.0128656	0.995998	-3.46593	NOT	COG7
SLC6A20	-0.135409	3.20599	-2.57034	0.0129177	0.995998	-3.46755	NOT	SLC6A20
ADGRB2	0.369561	3.98164	2.56971	0.0129385	0.995998	-3.46819	NOT	ADGRB2
TSPYL2	0.522926	4.49959	2.56904	0.0129611	0.995998	-3.46889	NOT	TSPYL2
PLCXD1	0.855846	6.52724	2.5642	0.0131229	0.995998	-3.47386	UP	PLCXD1
DPP8	-0.314518	5.0959	-2.55876	0.0133071	0.995998	-3.47944	NOT	DPP8
AK9	-0.199349	3.4925	-2.55829	0.0133233	0.995998	-3.47993	NOT	AK9
ARHGEF18	-0.475917	7.37422	-2.55797	0.0133343	0.995998	-3.48026	NOT	ARHGEF18
SEPSECS	-0.42623	4.42743	-2.55734	0.0133558	0.995998	-3.4809	NOT	SEPSECS
EDRF1	0.478079	7.15375	2.55689	0.0133712	0.995998	-3.48137	NOT	EDRF1
C14orf119	-0.188897	3.23347	-2.55663	0.0133799	0.995998	-3.48162	NOT	C14orf119
HDHD5	0.546161	7.62267	2.55411	0.0134665	0.995998	-3.48421	NOT	HDHD5
MAGEC2	-2.04477	4.62637	-2.55295	0.0135065	0.995998	-3.4854	DOWN	MAGEC2
LONRF1	0.940763	7.40469	2.55218	0.0135333	0.995998	-3.48619	UP	LONRF1
ZNF254	-0.558431	4.32667	-2.5514	0.0135603	0.995998	-3.48699	NOT	ZNF254
KRTAP5-3	-0.156262	3.24434	-2.55018	0.0136027	0.995998	-3.48824	NOT	KRTAP5-3
SPATA13	0.250913	3.26705	2.5467	0.0137241	0.995998	-3.49179	NOT	SPATA13
PRAF2	0.634517	4.55884	2.54443	0.0138039	0.995998	-3.49412	UP	PRAF2
S100A8	-0.951785	3.55418	-2.54347	0.0138377	0.995998	-3.49509	DOWN	S100A8
INTS8	-0.480598	8.65432	-2.54034	0.0139487	0.995998	-3.49829	NOT	INTS8
FAM120C	0.191173	3.4983	2.53827	0.0140224	0.995998	-3.5004	NOT	FAM120C
DYNLRB2	-0.498449	3.05824	-2.5344	0.0141616	0.995998	-3.50435	NOT	DYNLRB2
SLC45A4	-0.744962	4.50484	-2.53129	0.0142742	0.995998	-3.50752	DOWN	SLC45A4
FGD1	0.273932	3.50081	2.5294	0.0143431	0.995998	-3.50945	NOT	FGD1
C2orf76	-0.565996	5.79901	-2.52833	0.0143821	0.995998	-3.51054	NOT	C2orf76
MCAM	0.535725	4.37279	2.52777	0.0144026	0.995998	-3.51111	NOT	MCAM
RARRES1	-0.82087	3.1858	-2.52759	0.014409	0.995998	-3.51128	DOWN	RARRES1
HUWE1	0.327687	4.35087	2.52639	0.0144529	0.995998	-3.5125	NOT	HUWE1
ZFAND5	-0.377853	8.49328	-2.52545	0.0144876	0.995998	-3.51346	NOT	ZFAND5
FGF3	0.178779	3.11595	2.52415	0.0145358	0.995998	-3.51479	NOT	FGF3
EHD4	-0.406173	4.02736	-2.52381	0.0145481	0.995998	-3.51513	NOT	EHD4
GPRC5C	-1.319	5.12446	-2.52327	0.0145681	0.995998	-3.51567	DOWN	GPRC5C
DEFB131A	0.184231	2.78611	2.5201	0.0146858	0.995998	-3.51889	NOT	DEFB131A
ULK1	-0.381542	4.33879	-2.51543	0.0148608	0.995998	-3.52363	NOT	ULK1
MCM4	0.486204	7.79002	2.51543	0.014861	0.995998	-3.52364	NOT	MCM4
INTS10	0.516458	8.14424	2.51211	0.0149864	0.995998	-3.527	NOT	INTS10
TRAF5	0.987979	5.79634	2.50811	0.0151392	0.995998	-3.53105	UP	TRAF5
PATE1	-0.141325	3.16619	-2.50771	0.0151544	0.995998	-3.53146	NOT	PATE1
PCBD2	-0.727592	5.00426	-2.50666	0.0151946	0.995998	-3.53251	DOWN	PCBD2
RDH14	-0.394395	9.00849	-2.50601	0.0152198	0.995998	-3.53318	NOT	RDH14
SPATA9	-0.0879938	2.82859	-2.5053	0.015247	0.995998	-3.53389	NOT	SPATA9
YPEL5	-0.64622	7.96825	-2.50392	0.0153003	0.995998	-3.53529	DOWN	YPEL5
TBC1D12	0.598562	5.75902	2.50192	0.015378	0.995998	-3.53731	UP	TBC1D12
ADTRP	-0.254797	3.02605	-2.50187	0.0153797	0.995998	-3.53736	NOT	ADTRP
KYNU	-0.912195	3.15158	-2.4976	0.0155467	0.995998	-3.54167	DOWN	KYNU
CD81	1.07113	8.36774	2.48905	0.0158854	0.995998	-3.55029	UP	CD81
ATP5F1A	0.366462	10.8297	2.48891	0.0158912	0.995998	-3.55043	NOT	ATP5F1A
TMEM245	-0.465593	8.21575	-2.48881	0.0158952	0.995998	-3.55054	NOT	TMEM245
CHIA	-0.153317	3.04577	-2.4879	0.0159318	0.995998	-3.55145	NOT	CHIA
PRPS2	0.786611	8.5971	2.48695	0.0159697	0.995998	-3.5524	UP	PRPS2
MCPH1	0.428164	4.55207	2.48675	0.0159779	0.995998	-3.55261	NOT	MCPH1
ABHD17B	-0.378205	5.08221	-2.48602	0.0160073	0.995998	-3.55334	NOT	ABHD17B
TTC28	0.991363	6.35416	2.4857	0.0160203	0.995998	-3.55367	UP	TTC28
WNT7A	-0.19305	2.95837	-2.48415	0.0160828	0.995998	-3.55522	NOT	WNT7A
UBA1	0.506316	7.36025	2.48369	0.0161013	0.995998	-3.55568	NOT	UBA1
RHPN2	-0.669393	5.86732	-2.48326	0.0161188	0.995998	-3.55612	DOWN	RHPN2
MUCL1	-1.19339	4.23493	-2.47606	0.0164132	0.995998	-3.56335	DOWN	MUCL1
HEPN1	0.139807	3.35983	2.47251	0.0165601	0.995998	-3.56691	NOT	HEPN1
GFRA4	-0.294669	3.15724	-2.47037	0.016649	0.995998	-3.56904	NOT	GFRA4
CABIN1	0.463134	5.5675	2.46582	0.0168404	0.995998	-3.57361	NOT	CABIN1
POLR2K	-0.477366	9.99724	-2.4649	0.0168788	0.995998	-3.57452	NOT	POLR2K
DIXDC1	0.579772	4.83287	2.46241	0.0169847	0.995998	-3.57702	NOT	DIXDC1
ZNF680	-0.432269	3.90504	-2.46136	0.0170294	0.995998	-3.57807	NOT	ZNF680
PLAC8	-0.594006	3.8347	-2.46024	0.0170769	0.995998	-3.57918	DOWN	PLAC8
CENPC	-0.389049	5.01998	-2.46009	0.0170837	0.995998	-3.57934	NOT	CENPC
EIF3A	0.465305	9.17136	2.45792	0.0171763	0.995998	-3.58149	NOT	EIF3A
PALD1	0.510334	3.78011	2.45639	0.0172425	0.995998	-3.58303	NOT	PALD1
GDF7	0.120064	3.12305	2.45524	0.0172919	0.995998	-3.58417	NOT	GDF7
NMUR1	0.0982547	3.1085	2.45442	0.0173273	0.995998	-3.58499	NOT	NMUR1
FAM174A	-0.767326	5.63285	-2.45259	0.0174069	0.995998	-3.58682	DOWN	FAM174A
ATF7IP2	-0.288749	3.05377	-2.45099	0.0174764	0.995998	-3.58841	NOT	ATF7IP2
AASDH	-0.419737	6.83132	-2.44752	0.0176282	0.995998	-3.59186	NOT	AASDH
CWH43	-0.392055	3.3882	-2.44594	0.0176981	0.995998	-3.59344	NOT	CWH43
CBS	1.00896	6.90522	2.44523	0.0177295	0.995998	-3.59415	UP	CBS
MACF1	-0.625792	5.92211	-2.44198	0.0178735	0.995998	-3.59737	DOWN	MACF1
KIAA0754	-0.625792	5.92211	-2.44198	0.0178735	0.995998	-3.59737	DOWN	KIAA0754
LGALS8-AS1	-0.228355	3.29936	-2.43867	0.0180213	0.995998	-3.60066	NOT	LGALS8-AS1
LFNG	-0.75797	4.14479	-2.43674	0.018108	0.995998	-3.60258	DOWN	LFNG
SNU13	0.469185	9.59332	2.42881	0.0184683	0.995998	-3.61043	NOT	SNU13
H3F3C	-0.151804	3.05749	-2.42824	0.0184945	0.995998	-3.611	NOT	H3F3C
ZBED8	-0.669944	6.29794	-2.42824	0.0184945	0.995998	-3.611	DOWN	ZBED8
GDA	-0.403474	2.91236	-2.4237	0.0187038	0.995998	-3.61549	NOT	GDA
C17orf82	0.191058	3.45206	2.42201	0.0187826	0.995998	-3.61716	NOT	C17orf82
ZCCHC2	0.515069	5.21472	2.42177	0.0187936	0.995998	-3.6174	NOT	ZCCHC2
CACUL1	0.268833	4.98362	2.4193	0.0189088	0.995998	-3.61983	NOT	CACUL1
RDH16	-0.171917	3.25844	-2.41714	0.0190104	0.995998	-3.62197	NOT	RDH16
APOL2	-0.21431	3.46822	-2.416	0.019064	0.995998	-3.62309	NOT	APOL2
STRN	-0.217956	3.23557	-2.41346	0.0191843	0.995998	-3.6256	NOT	STRN
CRIPT	-0.311817	6.57062	-2.41194	0.0192562	0.995998	-3.62709	NOT	CRIPT
PLPP2	-1.5525	6.61377	-2.41083	0.0193094	0.995998	-3.62819	DOWN	PLPP2
ZCCHC4	-0.30579	4.22293	-2.40528	0.0195758	0.995998	-3.63365	NOT	ZCCHC4
TBX19	-0.232337	3.89523	-2.40034	0.0198159	0.995998	-3.63851	NOT	TBX19
LPAR5	0.109024	2.84952	2.39869	0.0198963	0.995998	-3.64012	NOT	LPAR5
METRNL	-0.904488	4.32386	-2.39111	0.0202712	0.995998	-3.64755	DOWN	METRNL
COTL1	-1.02521	6.27109	-2.38953	0.0203498	0.995998	-3.64909	DOWN	COTL1
PTPRD	0.972667	4.6148	2.38875	0.020389	0.995998	-3.64986	UP	PTPRD
STEAP3	-0.37086	3.93637	-2.38807	0.0204233	0.995998	-3.65053	NOT	STEAP3
C14orf28	-0.462484	4.94767	-2.38746	0.0204536	0.995998	-3.65112	NOT	C14orf28
NIBAN2	-0.699531	7.63487	-2.38715	0.0204693	0.995998	-3.65143	DOWN	NIBAN2
COQ2	-0.516259	5.89208	-2.38635	0.0205097	0.995998	-3.65221	NOT	COQ2
LELP1	0.113069	2.84092	2.38529	0.0205631	0.995998	-3.65325	NOT	LELP1
SEMA4C	-0.409496	4.99536	-2.38025	0.020819	0.995998	-3.65817	NOT	SEMA4C
SLC22A3	-0.371183	2.88626	-2.38009	0.0208268	0.995998	-3.65832	NOT	SLC22A3
MMP3	-0.449177	2.93955	-2.37873	0.0208966	0.995998	-3.65965	NOT	MMP3
TMPRSS15	-0.563268	3.25071	-2.37796	0.0209359	0.995998	-3.6604	NOT	TMPRSS15
TMEM104	-0.182398	4.35021	-2.37668	0.0210018	0.995998	-3.66165	NOT	TMEM104
SEC31B	0.384868	3.65961	2.36966	0.0213658	0.995998	-3.66849	NOT	SEC31B
IGFBP3	-1.35969	4.13469	-2.36959	0.0213695	0.995998	-3.66856	DOWN	IGFBP3
TMX3	0.450488	4.78241	2.36922	0.0213891	0.995998	-3.66892	NOT	TMX3
CSNK1A1	-0.604152	6.14588	-2.3668	0.0215159	0.995998	-3.67127	DOWN	CSNK1A1
IRAK3	-0.652599	3.53316	-2.36542	0.0215882	0.995998	-3.67261	DOWN	IRAK3
HIST1H2BC	-0.230068	2.97681	-2.36412	0.0216572	0.995998	-3.67388	NOT	HIST1H2BC
PA2G4	0.605859	8.44371	2.36372	0.0216782	0.995998	-3.67426	UP	PA2G4
DIRAS1	0.182948	3.3467	2.36288	0.0217228	0.995998	-3.67508	NOT	DIRAS1
HBQ1	1.40568	4.85411	2.36059	0.0218446	0.995998	-3.6773	UP	HBQ1
B3GALNT2	0.374264	5.19332	2.3539	0.0222035	0.995998	-3.68378	NOT	B3GALNT2
GYS1	0.190971	3.29475	2.35368	0.0222157	0.995998	-3.684	NOT	GYS1
CKAP4	0.56393	8.89489	2.35091	0.0223656	0.995998	-3.68668	NOT	CKAP4
TUBAL3	-0.162304	3.11586	-2.34978	0.0224274	0.995998	-3.68777	NOT	TUBAL3
RFC3	0.461453	7.24375	2.34753	0.0225504	0.995998	-3.68995	NOT	RFC3
GKN2	-0.383231	3.17541	-2.34744	0.0225552	0.995998	-3.69003	NOT	GKN2
ARL14	-0.541412	3.1154	-2.34734	0.0225608	0.995998	-3.69013	NOT	ARL14
TNFRSF1A	-0.415007	3.78537	-2.34612	0.0226278	0.995998	-3.69131	NOT	TNFRSF1A
C5orf34	-0.530193	5.9513	-2.34592	0.0226385	0.995998	-3.6915	NOT	C5orf34
UTP3	-0.385634	8.05021	-2.34408	0.0227403	0.995998	-3.69328	NOT	UTP3
MYL1	-0.235927	2.92739	-2.34393	0.0227487	0.995998	-3.69343	NOT	MYL1
FAM20A	-0.191951	3.02854	-2.3404	0.0229446	0.995998	-3.69683	NOT	FAM20A
TBC1D10C	0.114863	3.21798	2.33926	0.0230078	0.995998	-3.69793	NOT	TBC1D10C
C1orf54	0.870367	4.74482	2.33885	0.023031	0.995998	-3.69833	UP	C1orf54
NOSTRIN	-0.322131	3.21122	-2.33852	0.023049	0.995998	-3.69864	NOT	NOSTRIN
NEIL2	0.582665	4.67633	2.33723	0.0231213	0.995998	-3.69988	NOT	NEIL2
CKS2	-0.436561	10.5839	-2.33514	0.023239	0.995998	-3.7019	NOT	CKS2
STATH	0.0916264	2.70227	2.33421	0.0232913	0.995998	-3.70279	NOT	STATH
HECTD1	-0.449741	7.95372	-2.33124	0.0234594	0.995998	-3.70565	NOT	HECTD1
KLRC1	-0.189811	2.88016	-2.33111	0.0234668	0.995998	-3.70578	NOT	KLRC1
COQ7	-0.587299	5.92247	-2.33091	0.023478	0.995998	-3.70596	DOWN	COQ7
SENP5	-0.353845	5.58689	-2.32951	0.0235579	0.995998	-3.70731	NOT	SENP5
UBA52	0.489941	5.97931	2.32847	0.0236174	0.995998	-3.70832	NOT	UBA52
SMARCB1	0.412479	5.58288	2.3273	0.023684	0.995998	-3.70943	NOT	SMARCB1
ZDHHC18	0.24026	4.25021	2.32502	0.0238152	0.995998	-3.71163	NOT	ZDHHC18
DNAH5	-0.461801	3.57685	-2.32346	0.0239052	0.995998	-3.71313	NOT	DNAH5
RPS24	0.144404	3.92851	2.32137	0.0240258	0.995998	-3.71512	NOT	RPS24
NMB	0.796658	5.3394	2.32106	0.0240439	0.995998	-3.71542	UP	NMB
PPP1R3A	-0.178787	2.95167	-2.3197	0.0241229	0.995998	-3.71673	NOT	PPP1R3A
EWSR1	0.30506	7.25332	2.3179	0.0242284	0.995998	-3.71846	NOT	EWSR1
FUZ	0.55763	5.17787	2.31742	0.0242564	0.995998	-3.71892	NOT	FUZ
ARHGEF40	0.306688	3.74047	2.3169	0.0242867	0.995998	-3.71941	NOT	ARHGEF40
SLC27A5	0.778744	6.69391	2.31323	0.0245023	0.995998	-3.72292	UP	SLC27A5
NXF3	0.112708	3.25866	2.31285	0.0245248	0.995998	-3.72328	NOT	NXF3
TMPRSS7	-0.120391	3.29598	-2.3102	0.024682	0.995998	-3.72582	NOT	TMPRSS7
CIR1	-0.481172	6.78283	-2.30892	0.0247582	0.995998	-3.72704	NOT	CIR1
ZBTB39	0.150873	3.5968	2.30841	0.0247883	0.995998	-3.72752	NOT	ZBTB39
SND1	0.395969	8.45779	2.30607	0.0249284	0.995998	-3.72976	NOT	SND1
LTBR	-0.900785	4.54654	-2.30592	0.0249375	0.995998	-3.7299	DOWN	LTBR
ANGPTL3	-0.42158	2.86454	-2.30368	0.0250718	0.995998	-3.73204	NOT	ANGPTL3
SLC7A5	0.620567	5.15978	2.30265	0.0251343	0.995998	-3.73302	UP	SLC7A5
COX7B2	-0.976261	3.41439	-2.30112	0.0252267	0.995998	-3.73448	DOWN	COX7B2
TAS2R9	0.139701	2.93872	2.29823	0.0254026	0.995998	-3.73723	NOT	TAS2R9
LRRC69	-0.691624	3.33792	-2.29702	0.0254766	0.995998	-3.73839	DOWN	LRRC69
WDYHV1	-0.504435	7.85668	-2.29659	0.0255028	0.995998	-3.73879	NOT	WDYHV1
ZNF623	-0.247271	3.74119	-2.29602	0.0255375	0.995998	-3.73934	NOT	ZNF623
PKLR	0.0869409	3.17838	2.29554	0.0255667	0.995998	-3.73979	NOT	PKLR
VAPB	0.267212	5.25762	2.29523	0.025586	0.995998	-3.74009	NOT	VAPB
OR10K2	0.125586	2.93242	2.29347	0.0256939	0.995998	-3.74175	NOT	OR10K2
LTB4R2	0.124635	3.03434	2.29254	0.0257517	0.995998	-3.74265	NOT	LTB4R2
SPINK2	-0.519685	3.46928	-2.29237	0.025762	0.995998	-3.74281	NOT	SPINK2
AP1S3	-0.182022	3.0861	-2.29176	0.0257994	0.995998	-3.74338	NOT	AP1S3
APOOL	0.598951	6.21103	2.28933	0.0259505	0.995998	-3.7457	UP	APOOL
HAUS1	0.537373	9.41417	2.28874	0.0259871	0.995998	-3.74625	NOT	HAUS1
TGM2	-0.551433	3.28545	-2.28848	0.0260029	0.995998	-3.74649	NOT	TGM2
GCKR	-0.402756	3.01548	-2.2864	0.026133	0.995998	-3.74847	NOT	GCKR
MTF1	-0.475061	5.33735	-2.28563	0.0261813	0.995998	-3.7492	NOT	MTF1
IFNAR1	-0.386893	6.23506	-2.28521	0.0262071	0.995998	-3.7496	NOT	IFNAR1
ARMCX4	0.124582	3.13727	2.28322	0.0263323	0.995998	-3.75148	NOT	ARMCX4
RTTN	0.616833	6.78392	2.28246	0.0263801	0.995998	-3.7522	UP	RTTN
NOXRED1	-0.108745	3.08014	-2.28232	0.0263893	0.995998	-3.75234	NOT	NOXRED1
TBC1D2	-0.65605	4.41945	-2.28204	0.026407	0.995998	-3.75261	DOWN	TBC1D2
RCHY1	-0.393348	6.43009	-2.28191	0.0264148	0.995998	-3.75272	NOT	RCHY1
COX18	-0.311074	5.68625	-2.28094	0.0264761	0.995998	-3.75364	NOT	COX18
RALGAPA1	-0.455102	4.13952	-2.28076	0.0264874	0.995998	-3.75381	NOT	RALGAPA1
FOXI3	-0.128407	3.03893	-2.2804	0.0265106	0.995998	-3.75416	NOT	FOXI3
MAK16	0.560627	8.68613	2.2785	0.0266312	0.995998	-3.75596	NOT	MAK16
CCNB1	-0.496337	9.34969	-2.27762	0.026687	0.995998	-3.75678	NOT	CCNB1
KCTD4	-0.12298	2.81714	-2.27756	0.026691	0.995998	-3.75684	NOT	KCTD4
IQCG	-0.670209	4.95444	-2.27666	0.026748	0.995998	-3.75769	DOWN	IQCG
TBCA	-0.152325	3.69564	-2.27538	0.0268302	0.995998	-3.7589	NOT	TBCA
TOB2	0.298868	3.42632	2.27355	0.0269473	0.995998	-3.76063	NOT	TOB2
GPR162	0.163409	3.10591	2.27333	0.0269616	0.995998	-3.76084	NOT	GPR162
TSSK4	0.100522	2.9763	2.27253	0.0270132	0.995998	-3.7616	NOT	TSSK4
TJP2	-1.13062	6.52471	-2.27021	0.0271627	0.995998	-3.76378	DOWN	TJP2
NEIL1	0.536569	4.05083	2.2683	0.0272863	0.995998	-3.76558	NOT	NEIL1
CD59	-0.767506	8.21233	-2.26773	0.0273237	0.995998	-3.76612	DOWN	CD59
RAPGEF1	0.173028	4.04311	2.26756	0.0273346	0.995998	-3.76628	NOT	RAPGEF1
INIP	-0.419504	6.99478	-2.26577	0.0274512	0.995998	-3.76797	NOT	INIP
TGM5	0.152137	3.2934	2.26506	0.0274977	0.995998	-3.76864	NOT	TGM5
TOPAZ1	-0.116065	2.94841	-2.26498	0.0275031	0.995998	-3.76871	NOT	TOPAZ1
TAPT1	-0.549207	4.82207	-2.26385	0.0275769	0.995998	-3.76977	NOT	TAPT1
DCK	-0.466884	7.63151	-2.25998	0.027832	0.995998	-3.77342	NOT	DCK
TMEM67	-0.326187	3.50649	-2.25955	0.02786	0.995998	-3.77382	NOT	TMEM67
TRIM41	-0.351355	5.3204	-2.25949	0.0278639	0.995998	-3.77387	NOT	TRIM41
NDUFAF6	-0.363476	4.74306	-2.25788	0.0279712	0.995998	-3.77539	NOT	NDUFAF6
UGT2B10	-0.147226	3.03757	-2.25743	0.0280006	0.995998	-3.77581	NOT	UGT2B10
DHRS2	1.15875	3.84135	2.25568	0.0281175	0.995998	-3.77746	UP	DHRS2
OLR1	-0.169861	3.03613	-2.25562	0.0281213	0.995998	-3.77751	NOT	OLR1
PLEKHM1	-0.41021	5.7461	-2.25478	0.0281772	0.995998	-3.7783	NOT	PLEKHM1
ZNF675	-0.195996	3.11091	-2.2533	0.0282763	0.995998	-3.77969	NOT	ZNF675
LMAN1	0.586081	7.55862	2.25299	0.0282974	0.995998	-3.77998	UP	LMAN1
SPATA7	-0.289261	4.24579	-2.25283	0.028308	0.995998	-3.78013	NOT	SPATA7
MID1IP1	0.637467	6.40842	2.25252	0.028329	0.995998	-3.78042	UP	MID1IP1
EIF4E1B	-0.159522	3.15149	-2.25092	0.0284368	0.995998	-3.78193	NOT	EIF4E1B
ERAS	0.12979	3.26892	2.25028	0.0284796	0.995998	-3.78252	NOT	ERAS
SRP54	-0.451328	8.76639	-2.25023	0.0284831	0.995998	-3.78257	NOT	SRP54
ZNF131	-0.477204	6.70229	-2.24999	0.0284993	0.995998	-3.78279	NOT	ZNF131
C1QTNF12	-0.265831	3.39542	-2.24937	0.0285411	0.995998	-3.78337	NOT	C1QTNF12
RPL19	0.263107	12.4329	2.24887	0.028575	0.995998	-3.78384	NOT	RPL19
FSTL3	-0.352216	3.07004	-2.2483	0.0286134	0.995998	-3.78438	NOT	FSTL3
FAM200B	-0.45202	6.66538	-2.24685	0.0287122	0.995998	-3.78574	NOT	FAM200B
DPY19L4	-0.482727	5.95146	-2.24554	0.0288012	0.995998	-3.78696	NOT	DPY19L4
ABHD2	-0.585618	4.80065	-2.24529	0.0288183	0.995998	-3.7872	DOWN	ABHD2
NRP2	0.314224	3.44165	2.24444	0.0288764	0.995998	-3.78799	NOT	NRP2
MEAK7	-0.407337	3.98335	-2.24276	0.0289908	0.995998	-3.78956	NOT	MEAK7
ZMYM6	-0.262621	3.81523	-2.23941	0.0292217	0.995998	-3.79269	NOT	ZMYM6
ISOC2	-0.608349	7.64363	-2.23875	0.0292671	0.995998	-3.79331	DOWN	ISOC2
LDAH	-0.277338	3.84486	-2.23839	0.0292918	0.995998	-3.79364	NOT	LDAH
FAM214B	-0.27095	3.39246	-2.23799	0.0293195	0.995998	-3.79401	NOT	FAM214B
SLC6A5	0.13756	3.4095	2.23775	0.0293361	0.995998	-3.79424	NOT	SLC6A5
THBS3	0.816122	4.93582	2.23742	0.0293594	0.995998	-3.79455	UP	THBS3
CYP20A1	-0.415035	5.32675	-2.23604	0.0294551	0.995998	-3.79584	NOT	CYP20A1
WNT16	-0.181494	2.95959	-2.2345	0.029562	0.995998	-3.79727	NOT	WNT16
LRFN4	0.453309	4.71333	2.23425	0.0295795	0.995998	-3.7975	NOT	LRFN4
CCDC125	-0.194322	3.48727	-2.2342	0.0295834	0.995998	-3.79756	NOT	CCDC125
TMEM140	-0.179907	3.1813	-2.23382	0.0296095	0.995998	-3.7979	NOT	TMEM140
TMC8	0.1089	2.97554	2.2329	0.0296737	0.995998	-3.79876	NOT	TMC8
CACHD1	0.46348	4.28131	2.23256	0.0296978	0.995998	-3.79908	NOT	CACHD1
DSP	-1.96861	7.87793	-2.23211	0.0297296	0.995998	-3.7995	DOWN	DSP
BCL6B	0.094794	2.95259	2.23126	0.029789	0.995998	-3.80029	NOT	BCL6B
BCL2L13	0.296205	4.62962	2.23023	0.0298615	0.995998	-3.80125	NOT	BCL2L13
SAP30L	-0.447057	6.95219	-2.22986	0.0298872	0.995998	-3.80159	NOT	SAP30L
F2RL2	-0.334859	3.14826	-2.22712	0.0300806	0.995998	-3.80414	NOT	F2RL2
ATP6V1C1	-0.458562	6.96353	-2.22664	0.0301149	0.995998	-3.80459	NOT	ATP6V1C1
GALC	-0.438615	3.73911	-2.22569	0.0301821	0.995998	-3.80547	NOT	GALC
EIF5AL1	-0.51179	4.02673	-2.2241	0.0302952	0.995998	-3.80695	NOT	EIF5AL1
ZNF708	-0.684593	6.06578	-2.22393	0.0303076	0.995998	-3.80711	DOWN	ZNF708
PPP1R2C	-0.13372	3.23144	-2.22372	0.0303225	0.995998	-3.8073	NOT	PPP1R2C
ERICH6	0.134347	3.14146	2.2235	0.0303382	0.995998	-3.80751	NOT	ERICH6
UPRT	0.735373	5.73121	2.22201	0.0304444	0.995998	-3.80889	UP	UPRT
CCDC17	-0.113176	3.22609	-2.22075	0.0305351	0.995998	-3.81007	NOT	CCDC17
RBM18	-0.309728	6.52075	-2.2201	0.0305816	0.995998	-3.81067	NOT	RBM18
L3MBTL3	0.334681	3.39021	2.21974	0.0306076	0.995998	-3.811	NOT	L3MBTL3
SLC30A6	-0.218131	4.09992	-2.21795	0.0307363	0.995998	-3.81266	NOT	SLC30A6
MOGS	0.227456	4.25874	2.21784	0.0307447	0.995998	-3.81277	NOT	MOGS
DMRT3	-0.30631	3.07606	-2.21781	0.0307465	0.995998	-3.81279	NOT	DMRT3
AATK	0.500677	4.43939	2.21458	0.0309804	0.995998	-3.81578	NOT	AATK
ANLN	-0.568311	7.3635	-2.21391	0.0310296	0.995998	-3.81641	NOT	ANLN
VWF	-0.103066	3.20761	-2.21106	0.0312375	0.995998	-3.81904	NOT	VWF
AP5M1	-0.381659	6.33766	-2.20915	0.0313772	0.995998	-3.8208	NOT	AP5M1
PPFIA3	0.181172	3.96007	2.20758	0.0314931	0.995998	-3.82226	NOT	PPFIA3
CEP135	-0.512614	5.48998	-2.20744	0.0315033	0.995998	-3.82239	NOT	CEP135
C12orf29	0.386141	8.51273	2.20696	0.0315387	0.995998	-3.82283	NOT	C12orf29
ARGLU1	0.578604	9.54622	2.20583	0.0316223	0.995998	-3.82388	NOT	ARGLU1
PDCD6	-0.467909	5.16341	-2.20543	0.0316517	0.995998	-3.82424	NOT	PDCD6
XPO4	0.341955	4.13153	2.20506	0.0316791	0.995998	-3.82458	NOT	XPO4
TMEM156	-0.548539	3.33271	-2.20475	0.0317024	0.995998	-3.82487	NOT	TMEM156
NUP58	0.500374	5.82497	2.20405	0.0317544	0.995998	-3.82552	NOT	NUP58
KLF2	-0.850513	4.50085	-2.1996	0.0320866	0.995998	-3.82962	DOWN	KLF2
CALML5	-0.541314	2.94624	-2.19795	0.0322103	0.995998	-3.83114	NOT	CALML5
ASIC1	0.292356	3.72589	2.19794	0.0322111	0.995998	-3.83115	NOT	ASIC1
ATP5IF1	0.259536	9.79124	2.19639	0.0323275	0.995998	-3.83257	NOT	ATP5IF1
BAGE2	-0.564942	3.25017	-2.19427	0.0324882	0.995998	-3.83453	NOT	BAGE2
KREMEN1	0.429061	3.89958	2.19406	0.0325044	0.995998	-3.83473	NOT	KREMEN1
RELA	-0.200266	4.37932	-2.19259	0.0326159	0.995998	-3.83608	NOT	RELA
MRS2	-0.40422	6.57337	-2.19175	0.0326793	0.995998	-3.83684	NOT	MRS2
LIN54	-0.130978	3.68631	-2.19051	0.0327745	0.995998	-3.83799	NOT	LIN54
C1orf127	-0.368677	3.46789	-2.19039	0.0327831	0.995998	-3.83809	NOT	C1orf127
DDIT4	1.05398	8.80618	2.18911	0.0328811	0.995998	-3.83927	UP	DDIT4
BUB1	-0.473373	8.07704	-2.18866	0.0329155	0.995998	-3.83968	NOT	BUB1
MT2A	-1.01431	9.91904	-2.18628	0.033099	0.995998	-3.84187	DOWN	MT2A
ATXN10	0.270236	10.2066	2.18447	0.0332384	0.995998	-3.84353	NOT	ATXN10
PRDX4	0.386402	10.8422	2.18324	0.0333335	0.995998	-3.84465	NOT	PRDX4
KIAA0232	-0.369967	4.76294	-2.18287	0.0333627	0.995998	-3.845	NOT	KIAA0232
EIF5	-0.404227	8.53224	-2.18177	0.0334481	0.995998	-3.84601	NOT	EIF5
RBM17	0.284353	7.61673	2.18	0.0335857	0.995998	-3.84762	NOT	RBM17
CEP290	0.344476	3.94882	2.17849	0.0337037	0.995998	-3.849	NOT	CEP290
ZNF709	0.71321	6.30408	2.17828	0.0337205	0.995998	-3.8492	UP	ZNF709
BANF2	-0.106281	2.88989	-2.17568	0.0339244	0.995998	-3.85158	NOT	BANF2
PROCR	1.08906	4.22276	2.17478	0.0339955	0.995998	-3.8524	UP	PROCR
TMEM165	-0.298616	5.70515	-2.17467	0.0340041	0.995998	-3.8525	NOT	TMEM165
ATAD1	0.570489	8.03965	2.17197	0.0342178	0.995998	-3.85497	NOT	ATAD1
CEP97	-0.349333	4.91591	-2.17145	0.0342589	0.995998	-3.85544	NOT	CEP97
PTTG1IP	-0.399621	7.34845	-2.17009	0.034367	0.995998	-3.85668	NOT	PTTG1IP
LCE1D	0.256826	5.98021	2.16935	0.0344256	0.995998	-3.85735	NOT	LCE1D
UCA1	-0.249791	3.28861	-2.16876	0.0344729	0.995998	-3.85789	NOT	UCA1
PTTG1	-0.466274	11.1866	-2.16869	0.0344788	0.995998	-3.85796	NOT	PTTG1
PILRB	-0.502109	7.66471	-2.16706	0.0346086	0.995998	-3.85944	NOT	PILRB
PNCK	0.102665	2.98936	2.16692	0.0346199	0.995998	-3.85957	NOT	PNCK
TTLL6	-0.127389	3.09167	-2.16617	0.0346803	0.995998	-3.86025	NOT	TTLL6
THY1	0.988982	4.30656	2.16546	0.0347377	0.995998	-3.8609	UP	THY1
CYB561A3	-0.203305	3.51635	-2.16536	0.0347457	0.995998	-3.86099	NOT	CYB561A3
TM4SF1	-1.92922	5.09515	-2.16207	0.035011	0.995998	-3.86399	DOWN	TM4SF1
CREBRF	-0.469857	4.55794	-2.16029	0.0351549	0.995998	-3.8656	NOT	CREBRF
SLC30A9	-0.318363	7.5857	-2.15985	0.0351908	0.995998	-3.866	NOT	SLC30A9
RGR	-0.482378	3.16769	-2.15873	0.0352818	0.995998	-3.86702	NOT	RGR
SLPI	-1.25249	4.27567	-2.15811	0.0353324	0.995998	-3.86758	DOWN	SLPI
GATA6	-0.901633	4.08975	-2.15777	0.0353606	0.995998	-3.8679	DOWN	GATA6
CYP19A1	-0.387493	3.07784	-2.15755	0.0353784	0.995998	-3.86809	NOT	CYP19A1
CEACAM21	0.114365	3.26503	2.15737	0.0353927	0.995998	-3.86825	NOT	CEACAM21
SLFN12	-0.379139	3.02221	-2.15688	0.0354334	0.995998	-3.86871	NOT	SLFN12
SPANXD	-0.393991	3.69481	-2.15686	0.035435	0.995998	-3.86872	NOT	SPANXD
NDE1	-0.403761	5.31134	-2.15648	0.0354661	0.995998	-3.86907	NOT	NDE1
C15orf48	-0.416813	3.34019	-2.15516	0.0355741	0.995998	-3.87026	NOT	C15orf48
NOVA2	0.0907431	3.15118	2.15515	0.0355749	0.995998	-3.87027	NOT	NOVA2
MT1F	-1.55287	6.79147	-2.15504	0.0355838	0.995998	-3.87037	DOWN	MT1F
ABITRAM	-0.47051	6.54611	-2.15433	0.0356425	0.995998	-3.87102	NOT	ABITRAM
IL36G	-0.144701	3.11709	-2.15419	0.0356541	0.995998	-3.87115	NOT	IL36G
HIST1H2BD	-0.803803	6.59898	-2.15392	0.0356757	0.995998	-3.87138	DOWN	HIST1H2BD
KRT34	-0.321487	2.89037	-2.15366	0.0356976	0.995998	-3.87163	NOT	KRT34
PPP2R3C	-0.343337	3.47112	-2.15212	0.0358244	0.995998	-3.87302	NOT	PPP2R3C
IL1B	-0.156224	3.24826	-2.15188	0.0358444	0.995998	-3.87324	NOT	IL1B
VSIG1	-0.637134	2.91084	-2.15176	0.0358545	0.995998	-3.87335	DOWN	VSIG1
TMEM71	-0.431821	2.83699	-2.15041	0.0359657	0.995998	-3.87457	NOT	TMEM71
COX15	0.347804	5.60917	2.14971	0.0360239	0.995998	-3.8752	NOT	COX15
ABCA7	-0.194036	3.68489	-2.14672	0.0362725	0.995998	-3.87791	NOT	ABCA7
ZNF92	-0.505554	7.23137	-2.1444	0.036467	0.995998	-3.88001	NOT	ZNF92
SMIM7	-0.361852	7.8998	-2.14425	0.0364798	0.995998	-3.88015	NOT	SMIM7
PIK3IP1	-0.235277	3.66683	-2.14403	0.0364983	0.995998	-3.88035	NOT	PIK3IP1
RNF19B	-0.246415	4.06968	-2.1438	0.0365169	0.995998	-3.88055	NOT	RNF19B
SRRM1	0.39833	6.52451	2.14258	0.03662	0.995998	-3.88165	NOT	SRRM1
TPTE2	-0.285578	3.53965	-2.14133	0.0367252	0.995998	-3.88278	NOT	TPTE2
MTERF4	-0.322807	5.26068	-2.13956	0.0368745	0.995998	-3.88438	NOT	MTERF4
UVSSA	-0.26648	5.33794	-2.13908	0.0369159	0.995998	-3.88482	NOT	UVSSA
CRIPAK	-0.26648	5.33794	-2.13908	0.0369159	0.995998	-3.88482	NOT	CRIPAK
QSER1	-0.472624	7.60689	-2.13881	0.0369388	0.995998	-3.88506	NOT	QSER1
PI4K2B	-0.509557	7.1604	-2.1387	0.0369477	0.995998	-3.88516	NOT	PI4K2B
NISCH	0.461986	6.50343	2.13804	0.0370037	0.995998	-3.88575	NOT	NISCH
NRBP2	0.119764	3.32812	2.13778	0.0370258	0.995998	-3.88598	NOT	NRBP2
SP3	-0.3299	7.05541	-2.13762	0.0370397	0.995998	-3.88613	NOT	SP3
OR5D14	0.116488	2.96085	2.13686	0.0371044	0.995998	-3.88682	NOT	OR5D14
TEP1	-0.188336	3.73731	-2.13634	0.0371483	0.995998	-3.88728	NOT	TEP1
PRKDC	0.429163	7.01255	2.1345	0.0373057	0.995998	-3.88894	NOT	PRKDC
TAOK2	-0.111791	3.64496	-2.13309	0.0374264	0.995998	-3.89021	NOT	TAOK2
MUC20	-0.542875	3.44598	-2.13184	0.0375339	0.995998	-3.89134	NOT	MUC20
CATSPERB	-0.139597	3.34567	-2.13092	0.0376132	0.995998	-3.89217	NOT	CATSPERB
SPOUT1	-0.166289	3.82162	-2.12986	0.0377046	0.995998	-3.89312	NOT	SPOUT1
UBQLN1	-0.330872	8.45545	-2.12919	0.0377626	0.995998	-3.89372	NOT	UBQLN1
FOSL1	-0.290292	3.38147	-2.12789	0.0378751	0.995998	-3.89489	NOT	FOSL1
VPS53	0.18992	3.80319	2.12726	0.0379294	0.995998	-3.89545	NOT	VPS53
ATR	-0.451043	5.88541	-2.12572	0.0380636	0.995998	-3.89684	NOT	ATR
POLR1D	0.51915	7.67557	2.12441	0.038178	0.995998	-3.89802	NOT	POLR1D
ATP6V1G1	-0.350232	10.1828	-2.12342	0.0382642	0.995998	-3.8989	NOT	ATP6V1G1
CTNND1	-0.225577	3.74427	-2.12156	0.0384273	0.995998	-3.90057	NOT	CTNND1
OR13F1	0.135798	3.02183	2.12151	0.0384322	0.995998	-3.90062	NOT	OR13F1
AP1AR	-0.337137	6.87578	-2.11913	0.038641	0.995998	-3.90275	NOT	AP1AR
C15orf56	0.103486	2.717	2.11844	0.0387025	0.995998	-3.90337	NOT	C15orf56
PTPRJ	-0.0985201	3.13036	-2.11689	0.0388397	0.995998	-3.90476	NOT	PTPRJ
HDHD2	0.464289	7.32002	2.1168	0.0388476	0.995998	-3.90484	NOT	HDHD2
TMEM232	-0.100696	2.93263	-2.11532	0.0389788	0.995998	-3.90616	NOT	TMEM232
C6orf62	-0.361736	8.96426	-2.11446	0.039055	0.995998	-3.90693	NOT	C6orf62
REEP2	0.437915	4.75761	2.11314	0.0391729	0.995998	-3.90811	NOT	REEP2
WT1-AS	-0.155849	3.35997	-2.10895	0.0395491	0.995998	-3.91186	NOT	WT1-AS
TMEM135	-0.526268	5.04492	-2.10781	0.0396519	0.995998	-3.91288	NOT	TMEM135
GNB1L	0.261934	3.94647	2.10721	0.0397061	0.995998	-3.91341	NOT	GNB1L
OR8D1	-0.115079	2.96716	-2.10636	0.0397827	0.995998	-3.91417	NOT	OR8D1
CENPN	-0.363343	5.39474	-2.10603	0.0398126	0.995998	-3.91446	NOT	CENPN
DEFB1	-0.918339	3.72048	-2.10589	0.0398255	0.995998	-3.91459	DOWN	DEFB1
ERICH1	0.424921	6.75731	2.1054	0.0398699	0.995998	-3.91502	NOT	ERICH1
SGCA	0.0921025	3.01248	2.1053	0.0398784	0.995998	-3.91511	NOT	SGCA
BTC	-0.152692	3.31491	-2.10506	0.0399002	0.995998	-3.91532	NOT	BTC
GAK	-0.307258	6.03873	-2.10492	0.0399129	0.995998	-3.91545	NOT	GAK
IQCD	-0.364021	3.93022	-2.10464	0.0399383	0.995998	-3.9157	NOT	IQCD
DDX6	0.694676	4.57121	2.1031	0.0400784	0.995998	-3.91707	UP	DDX6
PLEKHA4	0.347756	3.7197	2.10259	0.0401254	0.995998	-3.91753	NOT	PLEKHA4
FLVCR1	0.461138	6.18458	2.1021	0.0401698	0.995998	-3.91796	NOT	FLVCR1
HIST1H2BJ	-0.601637	3.49957	-2.10068	0.0402992	0.995998	-3.91922	DOWN	HIST1H2BJ
TUT4	0.461733	6.52491	2.09984	0.0403768	0.995998	-3.91997	NOT	TUT4
GOLT1B	-0.466995	6.00993	-2.09968	0.0403912	0.995998	-3.92011	NOT	GOLT1B
SH3BGRL2	-0.690987	5.75973	-2.09935	0.0404212	0.995998	-3.92041	DOWN	SH3BGRL2
LINC01135	-0.110682	3.40001	-2.0985	0.0405	0.995998	-3.92117	NOT	LINC01135
CSTF2	0.411623	5.92376	2.09607	0.0407231	0.995998	-3.92332	NOT	CSTF2
ZNF383	-0.252245	3.45219	-2.09578	0.04075	0.995998	-3.92358	NOT	ZNF383
MYLK4	-0.120418	3.18034	-2.09532	0.0407929	0.995998	-3.92399	NOT	MYLK4
IL7R	-0.386008	2.98915	-2.09478	0.0408425	0.995998	-3.92447	NOT	IL7R
ADI1	-0.745927	8.37497	-2.09375	0.0409379	0.995998	-3.92538	DOWN	ADI1
ESRP2	-1.2294	5.07181	-2.09159	0.0411391	0.995998	-3.9273	DOWN	ESRP2
C18orf54	0.447692	4.85695	2.09002	0.0412854	0.995998	-3.92869	NOT	C18orf54
SNX6	-0.405414	8.61379	-2.0892	0.0413628	0.995998	-3.92942	NOT	SNX6
SLC4A2	0.436839	4.97918	2.08755	0.041517	0.995998	-3.93088	NOT	SLC4A2
PSTPIP2	0.538535	3.69894	2.08665	0.0416022	0.995998	-3.93168	NOT	PSTPIP2
AVP	-0.771323	3.20753	-2.08637	0.0416282	0.995998	-3.93193	DOWN	AVP
NOL8	-0.327867	7.37445	-2.086	0.0416631	0.995998	-3.93225	NOT	NOL8
SWI5	-0.434483	8.32875	-2.08562	0.0416984	0.995998	-3.93259	NOT	SWI5
FBXW12	-0.121692	3.04576	-2.08373	0.0418775	0.995998	-3.93426	NOT	FBXW12
SLC8A2	0.119242	3.40563	2.08371	0.0418795	0.995998	-3.93428	NOT	SLC8A2
SLC2A8	-0.436486	5.60093	-2.08362	0.0418881	0.995998	-3.93436	NOT	SLC2A8
CNTLN	0.503407	4.36807	2.08338	0.0419107	0.995998	-3.93457	NOT	CNTLN
PLAUR	-0.658181	4.19036	-2.07973	0.0422572	0.995998	-3.93779	DOWN	PLAUR
PLD5	-0.626603	3.66645	-2.07955	0.0422747	0.995998	-3.93796	DOWN	PLD5
EZH1	0.301632	5.74165	2.07821	0.0424023	0.995998	-3.93914	NOT	EZH1
GTPBP6	0.400073	6.68164	2.07723	0.0424966	0.995998	-3.94	NOT	GTPBP6
ZNF552	-0.291194	4.04152	-2.07702	0.0425165	0.995998	-3.94019	NOT	ZNF552
MPV17L2	-0.460884	5.89183	-2.07657	0.0425596	0.995998	-3.94058	NOT	MPV17L2
DSPP	-0.0865967	2.80177	-2.07609	0.0426055	0.995998	-3.94101	NOT	DSPP
CUTC	0.49565	5.77567	2.07605	0.0426094	0.995998	-3.94104	NOT	CUTC
EMD	0.416322	7.54962	2.07595	0.042619	0.995998	-3.94113	NOT	EMD
DDT	0.378684	9.79445	2.07573	0.0426402	0.995998	-3.94132	NOT	DDT
MTHFD2	0.436409	10.7075	2.07397	0.0428096	0.995998	-3.94287	NOT	MTHFD2
FBXO33	-0.397854	6.87591	-2.07367	0.0428388	0.995998	-3.94314	NOT	FBXO33
RDH12	0.175974	2.98129	2.07235	0.0429667	0.995998	-3.94431	NOT	RDH12
EIF3F	0.103393	2.59735	2.07109	0.0430887	0.995998	-3.94542	NOT	EIF3F
PIH1D1	0.329555	8.76228	2.07054	0.043142	0.995998	-3.9459	NOT	PIH1D1
NPRL2	0.356686	7.55824	2.0702	0.043175	0.995998	-3.9462	NOT	NPRL2
MRPL38	0.356945	6.01264	2.0694	0.043253	0.995998	-3.9469	NOT	MRPL38
RFC1	-0.327499	7.6655	-2.06864	0.0433272	0.995998	-3.94757	NOT	RFC1
HMBOX1	0.390363	3.9448	2.06829	0.0433611	0.995998	-3.94788	NOT	HMBOX1
OSMR	-0.400032	3.22855	-2.06772	0.043417	0.995998	-3.94838	NOT	OSMR
PRKCSH	0.276707	4.76875	2.06762	0.0434264	0.995998	-3.94847	NOT	PRKCSH
ESS2	0.271595	4.34513	2.06723	0.0434644	0.995998	-3.94881	NOT	ESS2
OSER1	-0.359311	7.32575	-2.06682	0.043505	0.995998	-3.94917	NOT	OSER1
IL31RA	-0.193098	3.12082	-2.06635	0.0435503	0.995998	-3.94958	NOT	IL31RA
ELK1	0.149266	3.56555	2.06597	0.0435875	0.995998	-3.94991	NOT	ELK1
LAMP3	-0.676238	4.55666	-2.06423	0.0437587	0.995998	-3.95145	DOWN	LAMP3
OR56B1	-0.12084	2.837	-2.06407	0.0437745	0.995998	-3.95159	NOT	OR56B1
UQCRC1	0.41379	7.17797	2.0631	0.0438701	0.995998	-3.95244	NOT	UQCRC1
SCGB1D4	-0.0998362	3.09962	-2.0625	0.043929	0.995998	-3.95296	NOT	SCGB1D4
MBIP	-0.649777	8.91855	-2.06195	0.0439832	0.995998	-3.95344	DOWN	MBIP
A3GALT2	0.114027	2.82621	2.06177	0.0440013	0.995998	-3.95361	NOT	A3GALT2
ZBED5	-0.361104	9.32863	-2.06025	0.0441513	0.995998	-3.95493	NOT	ZBED5
TRIP11	-0.693222	5.39256	-2.05967	0.044209	0.995998	-3.95544	DOWN	TRIP11
CD1C	0.124919	2.97749	2.05839	0.0443365	0.995998	-3.95657	NOT	CD1C
NBR2	0.340965	4.79861	2.05788	0.0443868	0.995998	-3.95701	NOT	NBR2
VEGFA	0.539746	4.91777	2.05783	0.0443915	0.995998	-3.95705	NOT	VEGFA
PARP1	0.390223	8.02472	2.05783	0.0443922	0.995998	-3.95706	NOT	PARP1
SERPINF2	0.118906	3.30196	2.05778	0.0443971	0.995998	-3.9571	NOT	SERPINF2
OR51M1	-0.10486	3.01634	-2.05711	0.0444637	0.995998	-3.95769	NOT	OR51M1
GTSCR1	-0.118593	2.86808	-2.05639	0.0445359	0.995998	-3.95832	NOT	GTSCR1
FAAP24	-0.44246	4.48081	-2.05502	0.0446726	0.995998	-3.95952	NOT	FAAP24
CWF19L1	0.257341	4.78256	2.05398	0.0447767	0.995998	-3.96043	NOT	CWF19L1
CLCN2	0.128139	3.58993	2.05351	0.0448235	0.995998	-3.96084	NOT	CLCN2
XRCC2	0.273497	4.12094	2.05309	0.0448661	0.995998	-3.96121	NOT	XRCC2
HMX2	1.13722	4.40806	2.05264	0.044911	0.995998	-3.9616	UP	HMX2
C18orf25	0.402287	6.24264	2.05248	0.0449277	0.995998	-3.96174	NOT	C18orf25
C5orf56	-0.0993991	3.25711	-2.05208	0.0449681	0.995998	-3.96209	NOT	C5orf56
IRGM	0.124758	3.0117	2.05152	0.0450239	0.995998	-3.96258	NOT	IRGM
GLI2	0.107999	3.10032	2.05147	0.0450294	0.995998	-3.96262	NOT	GLI2
MTERF3	-0.331593	8.93202	-2.05045	0.0451316	0.995998	-3.96351	NOT	MTERF3
PTGER2	0.25408	3.2532	2.04968	0.0452101	0.995998	-3.96419	NOT	PTGER2
RAB21	-0.34274	7.36748	-2.04967	0.0452111	0.995998	-3.9642	NOT	RAB21
OR4D1	-0.102884	3.00463	-2.04833	0.0453466	0.995998	-3.96536	NOT	OR4D1
PRKAG2	-0.733331	6.40854	-2.04758	0.045423	0.995998	-3.96602	DOWN	PRKAG2
COPS9	-0.245045	7.86001	-2.04519	0.0456663	0.995998	-3.9681	NOT	COPS9
EPRS	0.389274	9.33444	2.04416	0.0457707	0.995998	-3.969	NOT	EPRS
SMIM24	0.285862	3.33101	2.04402	0.0457857	0.995998	-3.96912	NOT	SMIM24
KRTAP2-3	-0.611118	3.07784	-2.04382	0.0458054	0.995998	-3.96929	DOWN	KRTAP2-3
ZNF331	0.600307	6.14227	2.04298	0.0458921	0.995998	-3.97003	UP	ZNF331
SIX3	1.06762	5.16405	2.04188	0.0460052	0.995998	-3.97099	UP	SIX3
OR7A5	-0.114036	3.21796	-2.04153	0.0460405	0.995998	-3.97129	NOT	OR7A5
SLC22A11	0.0939107	3.11635	2.04045	0.0461514	0.995998	-3.97223	NOT	SLC22A11
SAR1B	-0.556009	7.53344	-2.0402	0.0461774	0.995998	-3.97245	NOT	SAR1B
RPE	-0.309858	6.83713	-2.03957	0.0462424	0.995998	-3.97299	NOT	RPE
SMARCA1	1.44408	6.91005	2.03948	0.0462518	0.995998	-3.97307	UP	SMARCA1
GALNT15	-0.0766771	2.92602	-2.03928	0.0462719	0.995998	-3.97324	NOT	GALNT15
IQCK	-0.570881	5.02873	-2.03909	0.0462921	0.995998	-3.97341	NOT	IQCK
VASH1-AS1	-0.227465	3.28593	-2.0387	0.0463322	0.995998	-3.97375	NOT	VASH1-AS1
C20orf204	0.11819	3.06874	2.03859	0.0463441	0.995998	-3.97385	NOT	C20orf204
SH3BGRL	1.50766	5.75875	2.03837	0.0463669	0.995998	-3.97404	UP	SH3BGRL
CLP1	-0.302183	7.41392	-2.03662	0.0465474	0.995998	-3.97556	NOT	CLP1
RBM46	-0.340707	3.1518	-2.03465	0.0467523	0.995998	-3.97727	NOT	RBM46
ANKRD13A	0.378429	7.00784	2.03437	0.0467817	0.995998	-3.97751	NOT	ANKRD13A
ITPRIPL1	0.392182	3.46825	2.03432	0.0467873	0.995998	-3.97756	NOT	ITPRIPL1
TMPRSS6	0.180529	3.23638	2.03398	0.0468225	0.995998	-3.97785	NOT	TMPRSS6
SAYSD1	-0.414029	6.61283	-2.03318	0.046906	0.995998	-3.97855	NOT	SAYSD1
FBXO38	-0.318413	6.151	-2.03302	0.0469226	0.995998	-3.97869	NOT	FBXO38
TTC30A	-0.322191	3.45497	-2.03288	0.0469372	0.995998	-3.97881	NOT	TTC30A
VSX2	0.0796825	2.95349	2.03212	0.047017	0.995998	-3.97947	NOT	VSX2
MXI1	0.58286	4.78787	2.03118	0.0471147	0.995998	-3.98028	NOT	MXI1
S100A9	-0.277633	2.97424	-2.03013	0.0472253	0.995998	-3.98119	NOT	S100A9
PCBP4	0.787116	6.35044	2.03001	0.0472381	0.995998	-3.9813	UP	PCBP4
CASKIN1	0.557241	4.457	2.02892	0.0473527	0.995998	-3.98224	NOT	CASKIN1
PCGF1	0.226312	4.33433	2.02854	0.0473922	0.995998	-3.98257	NOT	PCGF1
CCDC85A	0.808898	3.81884	2.02743	0.0475098	0.995998	-3.98353	UP	CCDC85A
NXPH2	0.242961	3.16843	2.02742	0.0475104	0.995998	-3.98354	NOT	NXPH2
DDX3Y	1.29561	4.32184	2.02618	0.047642	0.995998	-3.98461	UP	DDX3Y
ANKRD1	-0.821094	3.14047	-2.02426	0.0478451	0.995998	-3.98627	DOWN	ANKRD1
SAPCD2	-0.694698	8.12882	-2.02389	0.0478841	0.995998	-3.98659	DOWN	SAPCD2
C8orf37	-0.28728	3.47045	-2.02351	0.047925	0.995998	-3.98692	NOT	C8orf37
CLOCK	-0.257263	4.74668	-2.02342	0.047935	0.995998	-3.987	NOT	CLOCK
HIST1H1E	0.7281	4.01501	2.0234	0.0479365	0.995998	-3.98702	UP	HIST1H1E
HSF2BP	-0.329716	3.62016	-2.02189	0.048097	0.995998	-3.98832	NOT	HSF2BP
CAPS2	-0.28434	3.26174	-2.02138	0.048152	0.995998	-3.98876	NOT	CAPS2
POLDIP3	0.240026	4.61576	2.02108	0.0481845	0.995998	-3.98902	NOT	POLDIP3
DEUP1	-0.261764	3.02161	-2.01668	0.0486562	0.995998	-3.99282	NOT	DEUP1
BACE1	0.393858	4.71601	2.01662	0.0486628	0.995998	-3.99287	NOT	BACE1
MEP1A	-0.117994	3.38761	-2.01574	0.048758	0.995998	-3.99363	NOT	MEP1A
C3orf35	-0.110059	3.01897	-2.01574	0.0487581	0.995998	-3.99363	NOT	C3orf35
PROCA1	0.398605	4.07542	2.01372	0.0489767	0.995998	-3.99537	NOT	PROCA1
KRTAP15-1	-0.0919233	2.80244	-2.01368	0.0489807	0.995998	-3.9954	NOT	KRTAP15-1
TTK	-0.430728	8.95819	-2.01319	0.0490343	0.995998	-3.99583	NOT	TTK
TIGD2	-0.614627	6.01786	-2.01299	0.0490557	0.995998	-3.996	DOWN	TIGD2
TIMM22	0.280541	4.49696	2.0124	0.0491191	0.995998	-3.9965	NOT	TIMM22
ZNF574	0.116529	3.8773	2.01157	0.0492095	0.995998	-3.99722	NOT	ZNF574
SSBP4	0.472269	4.13526	2.01119	0.0492515	0.995998	-3.99755	NOT	SSBP4
PSMD1	-0.313013	9.91178	-2.01107	0.0492646	0.995998	-3.99765	NOT	PSMD1
SMC1A	0.383302	5.58711	2.0094	0.0494463	0.995998	-3.99908	NOT	SMC1A
SLC2A4	0.0732797	3.08975	2.00875	0.0495174	0.995998	-3.99964	NOT	SLC2A4
NUDT6	-0.355144	4.98087	-2.00832	0.0495642	0.995998	-4.00001	NOT	NUDT6
RUFY1	-0.469315	7.08373	-2.0074	0.0496653	0.995998	-4.0008	NOT	RUFY1
B3GNT7	-0.136359	3.21739	-2.00728	0.0496783	0.995998	-4.0009	NOT	B3GNT7
CNOT2	-0.293611	7.69234	-2.00657	0.0497565	0.995998	-4.00152	NOT	CNOT2
NTN5	-0.151884	3.19925	-2.00613	0.0498055	0.995998	-4.0019	NOT	NTN5
PAQR8	0.602627	5.27745	2.00568	0.0498542	0.995998	-4.00228	UP	PAQR8
TACC3	-0.233198	3.81664	-2.00486	0.0499444	0.995998	-4.00298	NOT	TACC3
LRATD1	-0.36193	3.50794	-2.0048	0.0499518	0.995998	-4.00304	NOT	LRATD1
SLC16A10	0.388396	4.47669	2.00361	0.0500831	0.995998	-4.00406	NOT	SLC16A10
VAT1	0.346735	4.90876	2.00351	0.0500942	0.995998	-4.00415	NOT	VAT1
DCAF4L1	-0.0895285	3.0942	-2.00281	0.0501717	0.995998	-4.00475	NOT	DCAF4L1
FAF1	0.272521	4.76527	2.00024	0.0504563	0.995998	-4.00694	NOT	FAF1
ZNRD2	-0.389558	8.54699	-1.99994	0.0504895	0.995998	-4.0072	NOT	ZNRD2
MRFAP1L1	-0.402934	8.02625	-1.99924	0.050568	0.995998	-4.0078	NOT	MRFAP1L1
GDE1	-0.400452	7.82895	-1.99741	0.0507716	0.995998	-4.00937	NOT	GDE1
FCHO2	-0.274775	4.16546	-1.99717	0.0507984	0.995998	-4.00957	NOT	FCHO2
ESRRA	-0.326654	4.20373	-1.99632	0.0508942	0.995998	-4.0103	NOT	ESRRA
ZUP1	-0.491903	6.95742	-1.99541	0.0509965	0.995998	-4.01108	NOT	ZUP1
TCEA1	0.353684	9.41307	1.99522	0.0510178	0.995998	-4.01125	NOT	TCEA1
PLSCR4	-0.390475	3.16491	-1.9943	0.0511208	0.995998	-4.01203	NOT	PLSCR4
ZNF580	0.363918	5.40779	1.99316	0.0512489	0.995998	-4.013	NOT	ZNF580
TEX45	-0.252171	3.31772	-1.99261	0.0513116	0.995998	-4.01348	NOT	TEX45
RTN4R	0.429742	4.06775	1.9925	0.0513233	0.995998	-4.01356	NOT	RTN4R
RPS12	0.269054	12.4928	1.99215	0.0513626	0.995998	-4.01386	NOT	RPS12
IER5L	-0.499322	4.34593	-1.99166	0.0514183	0.995998	-4.01428	NOT	IER5L
CNR2	-0.137984	3.28911	-1.99157	0.0514288	0.995998	-4.01436	NOT	CNR2
CT83	-0.473427	3.14657	-1.99153	0.0514334	0.995998	-4.0144	NOT	CT83
VPS37A	0.402816	6.4168	1.99123	0.051467	0.995998	-4.01465	NOT	VPS37A
CHD4	0.4166	8.75621	1.99083	0.051512	0.995998	-4.01499	NOT	CHD4
CSNK1G1	0.310333	5.75037	1.99083	0.0515125	0.995998	-4.01499	NOT	CSNK1G1
P2RY4	0.116668	3.09754	1.99003	0.0516032	0.995998	-4.01568	NOT	P2RY4
RSRC1	-0.507172	6.15424	-1.98965	0.051646	0.995998	-4.016	NOT	RSRC1
KRTAP19-3	0.0926799	3.16252	1.98927	0.0516893	0.995998	-4.01632	NOT	KRTAP19-3
LOC652276	0.301823	4.42027	1.98897	0.0517235	0.995998	-4.01658	NOT	LOC652276
PAPSS1	0.536872	8.03323	1.98867	0.0517572	0.995998	-4.01683	NOT	PAPSS1
WDR53	-0.371822	6.51737	-1.98714	0.0519309	0.995998	-4.01813	NOT	WDR53
CTBP2	0.577998	7.39239	1.98685	0.0519642	0.995998	-4.01838	NOT	CTBP2
HCAR1	0.0755677	3.04649	1.98518	0.0521552	0.995998	-4.01981	NOT	HCAR1
C20orf197	-0.745382	3.5183	-1.98511	0.0521634	0.995998	-4.01987	NOT	C20orf197
TRIM31	-0.349216	2.81003	-1.98403	0.0522867	0.995998	-4.02078	NOT	TRIM31
KDM1A	0.431047	9.7861	1.98361	0.0523358	0.995998	-4.02115	NOT	KDM1A
MYL6B	0.41244	8.10565	1.98305	0.0523992	0.995998	-4.02162	NOT	MYL6B
SHISA7	0.115841	3.10773	1.98281	0.0524268	0.995998	-4.02182	NOT	SHISA7
MAGEC1	-1.20822	4.07047	-1.98249	0.0524639	0.995998	-4.0221	NOT	MAGEC1
MAGEB16	-0.12229	3.08469	-1.98145	0.0525838	0.995998	-4.02298	NOT	MAGEB16
GTF2E2	0.453134	8.71963	1.98136	0.0525936	0.995998	-4.02306	NOT	GTF2E2
CHAC1	0.401758	3.90605	1.98102	0.0526334	0.995998	-4.02335	NOT	CHAC1
LIPE	0.176136	3.41328	1.98099	0.052637	0.995998	-4.02338	NOT	LIPE
AGK	0.227516	5.81573	1.97959	0.0527982	0.995998	-4.02456	NOT	AGK
CD9	-1.74652	7.07515	-1.97807	0.0529746	0.995998	-4.02585	NOT	CD9
KCTD17	0.412531	4.97355	1.97714	0.0530823	0.995998	-4.02664	NOT	KCTD17
SEPTIN6	0.651206	4.31125	1.97701	0.0530979	0.995998	-4.02676	NOT	SEPTIN6
ZHX2	-0.901995	4.85242	-1.97527	0.0533	0.995998	-4.02823	NOT	ZHX2
GPR171	0.236774	3.01852	1.97511	0.0533191	0.995998	-4.02837	NOT	GPR171
SDC1	-0.681897	5.62988	-1.97382	0.0534692	0.995998	-4.02946	NOT	SDC1
SEPTIN5	0.244642	3.76992	1.97351	0.0535052	0.995998	-4.02972	NOT	SEPTIN5
SIX6	-0.678654	3.73926	-1.97152	0.0537381	0.995998	-4.0314	NOT	SIX6
COMP	0.172211	3.4012	1.97148	0.0537428	0.995998	-4.03144	NOT	COMP
EPB41L4B	-0.602164	5.72799	-1.97097	0.0538036	0.995998	-4.03188	NOT	EPB41L4B
RNF44	-0.322762	5.66946	-1.97055	0.0538521	0.995998	-4.03222	NOT	RNF44
NEURL1	-0.308506	3.46683	-1.97025	0.053888	0.995998	-4.03248	NOT	NEURL1
PTBP3	-0.348079	4.31629	-1.96947	0.0539798	0.995998	-4.03314	NOT	PTBP3
SNHG7	0.329615	5.54373	1.96913	0.0540197	0.995998	-4.03343	NOT	SNHG7
KANSL2	-0.372111	8.77958	-1.96901	0.0540342	0.995998	-4.03353	NOT	KANSL2
UBE3B	-0.196487	4.15851	-1.9689	0.0540466	0.995998	-4.03362	NOT	UBE3B
SNRNP35	-0.182467	3.83096	-1.96866	0.0540748	0.995998	-4.03382	NOT	SNRNP35
PRDX2	0.776688	9.84015	1.96833	0.0541142	0.995998	-4.03411	NOT	PRDX2
NRSN2	0.124751	3.34915	1.96719	0.0542494	0.995998	-4.03507	NOT	NRSN2
NUFIP1	0.472968	5.66486	1.96698	0.0542742	0.995998	-4.03525	NOT	NUFIP1
RPS4X	0.236104	3.62578	1.96693	0.0542799	0.995998	-4.03529	NOT	RPS4X
CYP26A1	0.458951	3.36621	1.96644	0.0543379	0.995998	-4.03571	NOT	CYP26A1
ZNF358	0.106091	3.18346	1.96612	0.0543761	0.995998	-4.03598	NOT	ZNF358
ZNF560	-0.20842	2.98704	-1.96552	0.0544475	0.995998	-4.03649	NOT	ZNF560
PLBD2	0.133288	3.43397	1.96436	0.0545844	0.995998	-4.03746	NOT	PLBD2
GPR151	-0.113186	3.24041	-1.96426	0.0545973	0.995998	-4.03755	NOT	GPR151
PLP1	-0.30788	3.03861	-1.96386	0.0546447	0.995998	-4.03789	NOT	PLP1
SGK2	-0.1822	2.98728	-1.96378	0.0546539	0.995998	-4.03795	NOT	SGK2
SLC19A3	-0.154394	3.01956	-1.96362	0.0546729	0.995998	-4.03809	NOT	SLC19A3
PGK2	-0.130168	3.0664	-1.96331	0.0547095	0.995998	-4.03835	NOT	PGK2
PCGF5	-0.539136	5.77574	-1.96214	0.0548493	0.995998	-4.03933	NOT	PCGF5
HMGCR	-0.446336	8.28679	-1.96184	0.0548859	0.995998	-4.03959	NOT	HMGCR
LPIN1	-0.554745	6.83834	-1.96173	0.0548987	0.995998	-4.03968	NOT	LPIN1
GPATCH8	0.229837	6.08576	1.96167	0.0549054	0.995998	-4.03973	NOT	GPATCH8
MPP2	0.121003	3.49409	1.96166	0.0549071	0.995998	-4.03974	NOT	MPP2
ETV3L	-0.150807	3.4032	-1.96083	0.0550058	0.995998	-4.04044	NOT	ETV3L
ARL10	0.139554	3.39306	1.96002	0.0551037	0.995998	-4.04113	NOT	ARL10
SEMG2	-0.106554	2.98982	-1.95971	0.0551402	0.995998	-4.04138	NOT	SEMG2
KRTAP21-3	0.0731785	2.95294	1.95856	0.0552786	0.995998	-4.04235	NOT	KRTAP21-3
ZNF555	-0.356407	4.39003	-1.95839	0.0552991	0.995998	-4.0425	NOT	ZNF555
TMSB4Y	0.273227	3.30789	1.9576	0.055394	0.995998	-4.04316	NOT	TMSB4Y
SKIL	-0.351104	3.85032	-1.95734	0.0554258	0.995998	-4.04338	NOT	SKIL
ZFP62	-0.322877	5.8326	-1.95707	0.0554587	0.995998	-4.04361	NOT	ZFP62
SNHG12	0.504042	9.35489	1.95624	0.0555585	0.995998	-4.04431	NOT	SNHG12
MADCAM1	0.0727025	3.09315	1.95547	0.0556511	0.995998	-4.04495	NOT	MADCAM1
VPS26B	0.386481	6.39704	1.95443	0.0557775	0.995998	-4.04583	NOT	VPS26B
JPH4	0.149461	3.31608	1.95442	0.0557784	0.995998	-4.04584	NOT	JPH4
GRM8	-0.997879	3.80367	-1.95346	0.0558947	0.995998	-4.04664	NOT	GRM8
SEMA3B	0.176013	3.88137	1.95184	0.0560919	0.995998	-4.04801	NOT	SEMA3B
ERI2	-0.339788	5.26294	-1.95146	0.0561381	0.995998	-4.04832	NOT	ERI2
EPHB2	0.29429	3.98091	1.95134	0.0561529	0.995998	-4.04843	NOT	EPHB2
SMAD2	0.398745	7.08404	1.95115	0.0561764	0.995998	-4.04859	NOT	SMAD2
TMEM203	-0.310173	8.17247	-1.95058	0.0562462	0.995998	-4.04907	NOT	TMEM203
PTPN9	0.258104	4.13381	1.94965	0.0563595	0.995998	-4.04985	NOT	PTPN9
SIGIRR	-0.713933	5.20051	-1.94963	0.0563615	0.995998	-4.04986	NOT	SIGIRR
PTDSS2	0.376669	5.31659	1.94951	0.0563761	0.995998	-4.04996	NOT	PTDSS2
ZNF260	-0.357761	4.03987	-1.94841	0.0565115	0.995998	-4.05089	NOT	ZNF260
TMEM19	-0.435051	6.35603	-1.94803	0.0565574	0.995998	-4.0512	NOT	TMEM19
OR11H4	-0.0919723	2.82804	-1.94687	0.0567	0.995998	-4.05218	NOT	OR11H4
PPM1B	-0.286363	6.50864	-1.94621	0.0567808	0.995998	-4.05273	NOT	PPM1B
POLL	0.111544	3.44291	1.9462	0.0567822	0.995998	-4.05274	NOT	POLL
ALAS1	0.39363	7.25847	1.94605	0.0568008	0.995998	-4.05286	NOT	ALAS1
KCNAB3	0.498783	4.11166	1.94468	0.0569706	0.995998	-4.05402	NOT	KCNAB3
LRIT1	-0.116112	3.07551	-1.9445	0.0569921	0.995998	-4.05416	NOT	LRIT1
ZBTB38	-0.864447	6.10684	-1.94446	0.0569972	0.995998	-4.0542	NOT	ZBTB38
OR5L2	-0.106174	2.98118	-1.94427	0.0570206	0.995998	-4.05436	NOT	OR5L2
ETFA	0.45607	9.56593	1.94395	0.0570604	0.995998	-4.05463	NOT	ETFA
PTPRCAP	0.124371	3.12914	1.94365	0.0570978	0.995998	-4.05488	NOT	PTPRCAP
PRR16	-0.375607	3.09417	-1.94276	0.0572072	0.995998	-4.05562	NOT	PRR16
RHBDD3	0.307863	4.56753	1.94268	0.0572176	0.995998	-4.05569	NOT	RHBDD3
UBE2J2	-0.403789	7.67819	-1.94227	0.0572684	0.995998	-4.05603	NOT	UBE2J2
GARS	0.405507	10.9502	1.9418	0.0573269	0.995998	-4.05643	NOT	GARS
CP	-0.22269	3.0611	-1.94161	0.0573494	0.995998	-4.05658	NOT	CP
CCNG2	-0.302035	3.84529	-1.94154	0.0573581	0.995998	-4.05664	NOT	CCNG2
HIST1H2AC	-0.802172	5.32741	-1.94121	0.0573995	0.995998	-4.05692	NOT	HIST1H2AC
TNF	0.309019	3.34396	1.94057	0.0574793	0.995998	-4.05745	NOT	TNF
OPRL1	0.275659	3.70515	1.93953	0.0576091	0.995998	-4.05833	NOT	OPRL1
DPH3	-0.64994	6.17501	-1.93853	0.0577329	0.995998	-4.05916	NOT	DPH3
EMID1	0.197446	3.95679	1.93832	0.0577596	0.995998	-4.05933	NOT	EMID1
FZD10	-0.152275	3.1454	-1.93749	0.0578638	0.995998	-4.06003	NOT	FZD10
SPAG1	-0.620124	4.39405	-1.93631	0.0580111	0.995998	-4.06101	NOT	SPAG1
BMP3	-0.344695	3.09665	-1.93538	0.0581279	0.995998	-4.06179	NOT	BMP3
NAP1L5	-1.18009	5.51946	-1.93333	0.0583851	0.995998	-4.0635	NOT	NAP1L5
PM20D1	-0.102698	3.15245	-1.93203	0.05855	0.995998	-4.06459	NOT	PM20D1
ASIC5	0.113431	2.94011	1.9316	0.0586037	0.995998	-4.06494	NOT	ASIC5
SMC3	0.518938	9.00523	1.93143	0.0586251	0.995998	-4.06508	NOT	SMC3
NCR2	0.0828078	2.82668	1.93131	0.0586413	0.995998	-4.06519	NOT	NCR2
PORCN	0.419082	4.51953	1.93095	0.0586864	0.995998	-4.06548	NOT	PORCN
CYP2R1	-0.67817	6.34039	-1.93011	0.0587932	0.995998	-4.06619	NOT	CYP2R1
BPIFA4P	0.11316	2.87231	1.92913	0.0589172	0.995998	-4.067	NOT	BPIFA4P
DDX5	-0.242646	11.5903	-1.92891	0.0589456	0.995998	-4.06718	NOT	DDX5
SETD9	-0.391326	3.62518	-1.92834	0.0590176	0.995998	-4.06766	NOT	SETD9
INO80D	-0.187717	3.85692	-1.92813	0.0590445	0.995998	-4.06783	NOT	INO80D
ZNF347	0.575196	3.9293	1.92785	0.05908	0.995998	-4.06806	NOT	ZNF347
MAN2B2	-0.211742	4.18104	-1.92728	0.0591529	0.995998	-4.06854	NOT	MAN2B2
YTHDC1	-0.187898	4.65113	-1.92683	0.0592101	0.995998	-4.06891	NOT	YTHDC1
AKR1C2	-1.59234	4.51012	-1.92613	0.0592992	0.995998	-4.06949	NOT	AKR1C2
LUZP4	-0.257212	3.16916	-1.92538	0.0593955	0.995998	-4.07012	NOT	LUZP4
TDRD5	-0.392964	3.00388	-1.92527	0.0594094	0.995998	-4.07021	NOT	TDRD5
MYCL	-1.49054	4.71002	-1.92519	0.0594197	0.995998	-4.07028	NOT	MYCL
NMRK2	0.225115	3.21975	1.92451	0.0595062	0.995998	-4.07084	NOT	NMRK2
CREG2	-0.148395	3.17191	-1.92418	0.0595486	0.995998	-4.07111	NOT	CREG2
YME1L1	0.313593	7.9347	1.9241	0.0595593	0.995998	-4.07118	NOT	YME1L1
H3F3B	0.505388	9.59323	1.92375	0.0596038	0.995998	-4.07147	NOT	H3F3B
KIFC3	-0.40127	4.31519	-1.92317	0.0596786	0.995998	-4.07195	NOT	KIFC3
CNP	0.299288	5.23967	1.92271	0.0597369	0.995998	-4.07233	NOT	CNP
YWHAG	0.30023	5.16749	1.92215	0.0598088	0.995998	-4.0728	NOT	YWHAG
SIPA1	-0.600956	4.57448	-1.92213	0.059812	0.995998	-4.07282	NOT	SIPA1
IL18	-0.381792	3.19147	-1.92182	0.0598516	0.995998	-4.07307	NOT	IL18
PYCARD	0.714671	3.77332	1.92114	0.0599389	0.995998	-4.07363	NOT	PYCARD
L3HYPDH	-0.298781	3.20613	-1.92076	0.0599884	0.995998	-4.07395	NOT	L3HYPDH
PAIP1	-0.595548	7.76146	-1.92059	0.0600105	0.995998	-4.07409	NOT	PAIP1
ITGAL	-0.0678324	3.01218	-1.9197	0.0601256	0.995998	-4.07483	NOT	ITGAL
CCDC68	-0.301262	3.00138	-1.91936	0.0601687	0.995998	-4.07511	NOT	CCDC68
ODF3L1	0.116126	3.28947	1.91883	0.0602373	0.995998	-4.07555	NOT	ODF3L1
AZIN2	-0.172559	3.45037	-1.91806	0.0603377	0.995998	-4.07619	NOT	AZIN2
PMS2	0.24932	3.15614	1.91792	0.0603563	0.995998	-4.07631	NOT	PMS2
MROH9	-0.0811054	3.05723	-1.91738	0.0604263	0.995998	-4.07676	NOT	MROH9
NCAPH2	0.223822	4.74948	1.91718	0.0604517	0.995998	-4.07692	NOT	NCAPH2
SULT1B1	-0.177216	2.75742	-1.91691	0.0604865	0.995998	-4.07714	NOT	SULT1B1
XPO7	0.416522	7.21728	1.91583	0.0606276	0.995998	-4.07804	NOT	XPO7
POC5	-0.431531	6.71954	-1.91496	0.0607408	0.995998	-4.07876	NOT	POC5
AGFG2	-0.132115	3.4668	-1.91493	0.0607448	0.995998	-4.07878	NOT	AGFG2
EMP1	-0.760903	3.87932	-1.91436	0.0608193	0.995998	-4.07926	NOT	EMP1
RPS4Y1	2.49936	6.73711	1.91424	0.060835	0.995998	-4.07936	NOT	RPS4Y1
ERBIN	-0.403401	4.63065	-1.91403	0.0608618	0.995998	-4.07953	NOT	ERBIN
TBC1D30	-0.253901	3.78911	-1.91293	0.0610061	0.995998	-4.08044	NOT	TBC1D30
RAB20	-1.09571	4.11576	-1.91278	0.0610254	0.995998	-4.08056	NOT	RAB20
GRB2	0.272096	8.29653	1.91143	0.0612028	0.995998	-4.08168	NOT	GRB2
GGH	0.843945	9.8867	1.91122	0.0612303	0.995998	-4.08185	NOT	GGH
CD84	-0.0630998	3.08056	-1.90932	0.0614802	0.995998	-4.08342	NOT	CD84
TMEM218	0.509107	6.34993	1.90881	0.0615473	0.995998	-4.08384	NOT	TMEM218
MBNL1	-0.445726	5.82162	-1.90865	0.0615674	0.995998	-4.08397	NOT	MBNL1
ATP6V1B2	0.520305	8.24976	1.90852	0.0615852	0.995998	-4.08408	NOT	ATP6V1B2
GYPB	-0.0776565	3.06532	-1.90843	0.0615968	0.995998	-4.08415	NOT	GYPB
TTC6	-0.337984	3.07961	-1.90816	0.0616325	0.995998	-4.08438	NOT	TTC6
KLF3	-0.34251	4.50606	-1.9076	0.0617058	0.995998	-4.08483	NOT	KLF3
TFRC	-0.446913	10.2382	-1.90622	0.0618883	0.995998	-4.08597	NOT	TFRC
PCGF6	0.366516	3.94643	1.90519	0.0620255	0.995998	-4.08682	NOT	PCGF6
ACTR8	0.274459	5.21391	1.90495	0.0620577	0.995998	-4.08702	NOT	ACTR8
CAPS	-0.196684	3.48686	-1.90466	0.0620957	0.995998	-4.08726	NOT	CAPS
DPP9	-0.285568	5.38661	-1.90413	0.062166	0.995998	-4.08769	NOT	DPP9
PCM1	0.520157	5.52159	1.90373	0.0622194	0.995998	-4.08803	NOT	PCM1
SLC39A12	-0.093514	2.86257	-1.90351	0.0622482	0.995998	-4.0882	NOT	SLC39A12
RALGPS1	-0.193503	3.5177	-1.90351	0.0622485	0.995998	-4.08821	NOT	RALGPS1
TSPAN17	-0.441918	5.52021	-1.90299	0.0623187	0.995998	-4.08864	NOT	TSPAN17
RRAGD	0.677367	8.40116	1.90244	0.0623913	0.995998	-4.08909	NOT	RRAGD
RUNX2	-0.24551	3.41846	-1.90195	0.0624572	0.995998	-4.08949	NOT	RUNX2
CTDP1	0.416659	5.04491	1.9017	0.0624895	0.995998	-4.08969	NOT	CTDP1
SESN2	0.737889	6.59492	1.9016	0.0625039	0.995998	-4.08978	NOT	SESN2
F2RL1	-0.231308	3.2561	-1.90123	0.0625532	0.995998	-4.09009	NOT	F2RL1
DLGAP5	-0.464706	9.26957	-1.89985	0.0627381	0.995998	-4.09122	NOT	DLGAP5
MUC6	-0.242246	3.24997	-1.89959	0.0627722	0.995998	-4.09143	NOT	MUC6
CBARP	-0.155142	3.08448	-1.89856	0.0629102	0.995998	-4.09228	NOT	CBARP
FILIP1L	-0.339096	3.23229	-1.89729	0.0630816	0.995998	-4.09332	NOT	FILIP1L
SMC2	-0.577501	7.98533	-1.89672	0.0631587	0.995998	-4.09379	NOT	SMC2
BARD1	-0.559049	8.05938	-1.89621	0.0632267	0.995998	-4.09421	NOT	BARD1
ATP6V0E1	-0.491621	8.17018	-1.89589	0.0632701	0.995998	-4.09447	NOT	ATP6V0E1
ALPK1	-0.16645	3.26034	-1.89566	0.0633006	0.995998	-4.09466	NOT	ALPK1
GIT1	0.112985	3.45449	1.89564	0.0633032	0.995998	-4.09467	NOT	GIT1
SUSD5	0.130782	2.95592	1.89512	0.0633743	0.995998	-4.0951	NOT	SUSD5
NFYA	-0.437404	5.27799	-1.89465	0.0634374	0.995998	-4.09549	NOT	NFYA
UGT2B11	-0.0972113	2.66647	-1.89332	0.0636181	0.995998	-4.09658	NOT	UGT2B11
CDK8	0.469037	7.14824	1.89267	0.0637061	0.995998	-4.09711	NOT	CDK8
DENND6A	0.369165	7.85239	1.89234	0.0637506	0.995998	-4.09738	NOT	DENND6A
DZANK1	-0.40409	3.96583	-1.89143	0.0638742	0.995998	-4.09813	NOT	DZANK1
SLC39A9	-0.162837	3.93228	-1.8913	0.0638922	0.995998	-4.09824	NOT	SLC39A9
PPP1R9B	0.177704	4.77098	1.89095	0.0639392	0.995998	-4.09852	NOT	PPP1R9B
GMFB	-0.36256	6.75552	-1.89084	0.063955	0.995998	-4.09861	NOT	GMFB
RENBP	0.116629	3.09566	1.89083	0.0639565	0.995998	-4.09862	NOT	RENBP
GGA1	0.228623	4.53395	1.8895	0.064138	0.995998	-4.09971	NOT	GGA1
PXK	0.294182	3.75822	1.8895	0.0641381	0.995998	-4.09971	NOT	PXK
SUPT7L	-0.229597	5.29816	-1.88832	0.0642993	0.995998	-4.10068	NOT	SUPT7L
EFHD2	-0.508119	5.12725	-1.8879	0.0643569	0.995998	-4.10102	NOT	EFHD2
PRDX3	0.276922	10.7632	1.88759	0.0643984	0.995998	-4.10127	NOT	PRDX3
EDN1	-0.549949	3.30446	-1.88678	0.0645097	0.995998	-4.10193	NOT	EDN1
IFNGR2	-0.46893	7.5364	-1.88593	0.064626	0.995998	-4.10263	NOT	IFNGR2
CYP2S1	-0.398732	3.10144	-1.88533	0.0647095	0.995998	-4.10312	NOT	CYP2S1
VWA8	0.492634	4.69908	1.8853	0.0647125	0.995998	-4.10314	NOT	VWA8
CDT1	0.334906	5.22839	1.88502	0.0647513	0.995998	-4.10337	NOT	CDT1
PDCD11	0.471755	5.63776	1.88495	0.0647607	0.995998	-4.10343	NOT	PDCD11
SOD3	0.0865855	3.18485	1.88378	0.0649228	0.995998	-4.10439	NOT	SOD3
GSPT2	0.861907	4.44696	1.88367	0.0649382	0.995998	-4.10448	NOT	GSPT2
PHF20L1	-0.392554	6.39203	-1.88304	0.065024	0.995998	-4.10498	NOT	PHF20L1
NDUFAF3	0.31636	9.6748	1.8828	0.0650574	0.995998	-4.10518	NOT	NDUFAF3
LVRN	-0.159875	3.11791	-1.88261	0.065084	0.995998	-4.10534	NOT	LVRN
TNR	0.0689684	2.97547	1.88211	0.0651535	0.995998	-4.10575	NOT	TNR
TRIM61	-0.120567	3.47624	-1.88176	0.0652014	0.995998	-4.10603	NOT	TRIM61
DTL	0.3955	7.42006	1.88088	0.065324	0.995998	-4.10675	NOT	DTL
ZNF273	-0.399341	4.17707	-1.88071	0.0653476	0.995998	-4.10689	NOT	ZNF273
LY6E	0.469619	4.38166	1.88004	0.0654404	0.995998	-4.10744	NOT	LY6E
GAL3ST2	0.110609	3.01218	1.87995	0.0654523	0.995998	-4.10751	NOT	GAL3ST2
LAPTM4A	-0.388579	10.2557	-1.87946	0.0655212	0.995998	-4.10791	NOT	LAPTM4A
FAM86C1	-0.183294	2.88922	-1.87874	0.0656207	0.995998	-4.10849	NOT	FAM86C1
OSR1	-0.118629	3.01457	-1.87742	0.0658055	0.995998	-4.10957	NOT	OSR1
PFKFB1	-0.14278	3.35784	-1.87726	0.0658274	0.995998	-4.1097	NOT	PFKFB1
GABARAPL1	-0.608075	5.10687	-1.87707	0.0658538	0.995998	-4.10986	NOT	GABARAPL1
EID2B	-0.393001	5.28257	-1.87508	0.0661327	0.995998	-4.11148	NOT	EID2B
DDIAS	-0.332676	5.21738	-1.87422	0.0662521	0.995998	-4.11217	NOT	DDIAS
ESCO1	0.518244	6.80662	1.87394	0.0662916	0.995998	-4.1124	NOT	ESCO1
SLC6A18	0.147434	3.63943	1.87383	0.0663077	0.995998	-4.11249	NOT	SLC6A18
TMEM267	-0.492062	5.32315	-1.8734	0.0663684	0.995998	-4.11284	NOT	TMEM267
LMTK2	0.0918195	3.06485	1.87273	0.0664621	0.995998	-4.11338	NOT	LMTK2
HNRNPF	-0.297087	10.1258	-1.87197	0.066569	0.995998	-4.114	NOT	HNRNPF
YY1	0.281734	8.02728	1.87089	0.066722	0.995998	-4.11488	NOT	YY1
ATP6V1C2	-0.605731	3.80702	-1.87055	0.0667689	0.995998	-4.11515	NOT	ATP6V1C2
RAD9B	-0.0785807	2.93785	-1.86932	0.0669431	0.995998	-4.11615	NOT	RAD9B
TPGS2	0.497721	8.92544	1.86887	0.0670074	0.995998	-4.11652	NOT	TPGS2
C19orf73	-0.159536	3.21723	-1.86882	0.0670147	0.995998	-4.11656	NOT	C19orf73
BRSK2	0.169331	3.72871	1.86862	0.0670421	0.995998	-4.11672	NOT	BRSK2
UBTF	0.290697	5.71965	1.86854	0.0670532	0.995998	-4.11678	NOT	UBTF
HPSE	-0.699346	5.22811	-1.86796	0.0671365	0.995998	-4.11726	NOT	HPSE
SH2D4B	-0.125014	3.04361	-1.86788	0.067147	0.995998	-4.11732	NOT	SH2D4B
MRPL1	-0.337153	9.30388	-1.86682	0.0672983	0.995998	-4.11818	NOT	MRPL1
HEATR5A	-0.686891	6.28664	-1.86508	0.0675463	0.995998	-4.11959	NOT	HEATR5A
MRPS36	-0.316695	4.49217	-1.86493	0.0675673	0.995998	-4.11971	NOT	MRPS36
HTATIP2	-1.17495	7.0825	-1.86421	0.06767	0.995998	-4.12029	NOT	HTATIP2
ZBTB26	-0.181196	3.35165	-1.86334	0.0677946	0.995998	-4.121	NOT	ZBTB26
OR2A12	0.103109	2.87378	1.8631	0.0678294	0.995998	-4.1212	NOT	OR2A12
UBE2Q2	-0.43252	6.43654	-1.86289	0.0678595	0.995998	-4.12137	NOT	UBE2Q2
ELOVL7	-0.595624	5.03938	-1.86252	0.0679126	0.995998	-4.12167	NOT	ELOVL7
ERF	0.184498	3.58929	1.86146	0.0680646	0.995998	-4.12252	NOT	ERF
OR56A5	0.0926192	2.86269	1.86064	0.0681814	0.995998	-4.12318	NOT	OR56A5
DGKI	0.637824	3.72713	1.85941	0.0683585	0.995998	-4.12418	NOT	DGKI
CDO1	1.06263	4.13476	1.85887	0.0684365	0.995998	-4.12461	NOT	CDO1
CARTPT	0.354588	2.99558	1.85856	0.0684814	0.995998	-4.12486	NOT	CARTPT
TRMT2A	0.191307	4.23655	1.85831	0.0685173	0.995998	-4.12506	NOT	TRMT2A
LINC01119	-0.24506	3.16076	-1.85794	0.0685708	0.995998	-4.12536	NOT	LINC01119
ST6GALNAC5	1.11156	4.4103	1.85723	0.0686729	0.995998	-4.12593	NOT	ST6GALNAC5
NFIL3	-0.593556	6.99958	-1.85676	0.068741	0.995998	-4.12631	NOT	NFIL3
CYP4X1	-0.821581	3.81279	-1.85671	0.0687495	0.995998	-4.12636	NOT	CYP4X1
RECQL	-0.422127	7.9422	-1.85607	0.0688419	0.995998	-4.12688	NOT	RECQL
SERPINE1	-0.362729	3.48676	-1.8552	0.0689677	0.995998	-4.12757	NOT	SERPINE1
SMPD3	-0.532009	4.45173	-1.85404	0.0691368	0.995998	-4.12851	NOT	SMPD3
ASPM	-0.432532	9.07662	-1.85275	0.0693237	0.995998	-4.12955	NOT	ASPM
UBE2U	-0.11615	2.84139	-1.85149	0.0695082	0.995998	-4.13056	NOT	UBE2U
SLC2A14	0.125268	3.13325	1.85137	0.0695256	0.995998	-4.13066	NOT	SLC2A14
ZNF157	0.112059	3.11178	1.85103	0.069576	0.995998	-4.13094	NOT	ZNF157
XDH	-0.334864	3.60065	-1.8507	0.069623	0.995998	-4.1312	NOT	XDH
PDAP1	0.253906	4.68746	1.85	0.0697257	0.995998	-4.13176	NOT	PDAP1
MRPL28	0.322099	9.29001	1.84934	0.0698224	0.995998	-4.13229	NOT	MRPL28
APOA5	0.0829483	3.11173	1.8493	0.0698292	0.995998	-4.13233	NOT	APOA5
NXPH4	0.10289	3.51596	1.84928	0.0698317	0.995998	-4.13234	NOT	NXPH4
MPHOSPH9	-0.321787	4.62373	-1.84925	0.0698355	0.995998	-4.13236	NOT	MPHOSPH9
TOGARAM2	0.228801	3.87491	1.84919	0.0698453	0.995998	-4.13242	NOT	TOGARAM2
ID3	0.913875	9.11271	1.84909	0.0698595	0.995998	-4.13249	NOT	ID3
FBF1	-0.0717499	3.17896	-1.848	0.0700203	0.995998	-4.13337	NOT	FBF1
NOTUM	0.123478	3.09518	1.84554	0.0703818	0.995998	-4.13535	NOT	NOTUM
PCF11	-0.254784	5.24623	-1.8451	0.0704467	0.995998	-4.1357	NOT	PCF11
TAB1	0.0929306	3.49462	1.84477	0.0704958	0.995998	-4.13596	NOT	TAB1
MYCBP	-0.603684	7.83863	-1.84467	0.0705109	0.995998	-4.13605	NOT	MYCBP
SBF1	0.189489	3.86006	1.84452	0.0705325	0.995998	-4.13616	NOT	SBF1
TMEM114	-0.157376	3.82871	-1.84377	0.0706442	0.995998	-4.13677	NOT	TMEM114
STIL	-0.398259	7.07747	-1.84339	0.0707004	0.995998	-4.13707	NOT	STIL
NECAP2	-0.295856	6.03986	-1.84209	0.0708935	0.995998	-4.13812	NOT	NECAP2
ZNF441	0.691005	5.27565	1.84184	0.0709304	0.995998	-4.13832	NOT	ZNF441
MMP1	-0.688077	3.29301	-1.84164	0.0709605	0.995998	-4.13848	NOT	MMP1
HIPK3	-0.0888053	3.06333	-1.84155	0.0709742	0.995998	-4.13855	NOT	HIPK3
KLK9	0.101309	3.17736	1.84136	0.0710023	0.995998	-4.1387	NOT	KLK9
IMPDH2	0.494492	9.72243	1.84109	0.0710428	0.995998	-4.13892	NOT	IMPDH2
GTF2A1	0.613	4.35914	1.84076	0.0710911	0.995998	-4.13918	NOT	GTF2A1
ZNF7	-0.332064	7.91119	-1.83971	0.0712479	0.995998	-4.14002	NOT	ZNF7
ZDHHC17	-0.229133	4.6857	-1.83889	0.0713703	0.995998	-4.14068	NOT	ZDHHC17
STX1B	0.0848874	3.2678	1.83861	0.0714127	0.995998	-4.14091	NOT	STX1B
NEAT1	-0.125232	2.9882	-1.83848	0.0714311	0.995998	-4.14101	NOT	NEAT1
NPW	1.21829	5.16235	1.8382	0.0714728	0.995998	-4.14123	NOT	NPW
TGOLN2	-0.275214	6.10844	-1.83802	0.0714999	0.995998	-4.14137	NOT	TGOLN2
PEX13	-0.454871	5.59154	-1.83743	0.071589	0.995998	-4.14185	NOT	PEX13
ECT2	-0.307589	7.78172	-1.83621	0.0717715	0.995998	-4.14282	NOT	ECT2
OR5K2	-0.0789669	2.64685	-1.83607	0.0717927	0.995998	-4.14294	NOT	OR5K2
FGFR1OP	-0.487195	5.24253	-1.83565	0.0718561	0.995998	-4.14327	NOT	FGFR1OP
DNALI1	-0.853307	4.42715	-1.83489	0.0719701	0.995998	-4.14388	NOT	DNALI1
CHRNB3	-0.230602	2.90061	-1.83475	0.0719905	0.995998	-4.14399	NOT	CHRNB3
VPS26C	-0.273982	6.14437	-1.83413	0.0720846	0.995998	-4.14449	NOT	VPS26C
PLD6	0.48557	4.39154	1.83404	0.0720987	0.995998	-4.14456	NOT	PLD6
HSD17B10	0.328841	10.0013	1.83388	0.0721226	0.995998	-4.14469	NOT	HSD17B10
ARV1	0.32186	7.68348	1.83381	0.0721334	0.995998	-4.14475	NOT	ARV1
DRG1	0.306726	10.1117	1.83361	0.0721637	0.995998	-4.14491	NOT	DRG1
LRRCC1	-0.478719	4.38204	-1.83357	0.0721696	0.995998	-4.14494	NOT	LRRCC1
NFU1	0.453136	6.75276	1.83352	0.0721764	0.995998	-4.14497	NOT	NFU1
GABRE	-0.152835	3.25283	-1.83334	0.0722039	0.995998	-4.14512	NOT	GABRE
TMEM145	0.539763	5.49022	1.8332	0.0722243	0.995998	-4.14523	NOT	TMEM145
LYG1	-0.376049	4.66995	-1.8332	0.0722247	0.995998	-4.14523	NOT	LYG1
MMP7	-0.557481	3.02724	-1.83275	0.0722921	0.995998	-4.14558	NOT	MMP7
BIK	-0.912289	4.54459	-1.83263	0.0723104	0.995998	-4.14568	NOT	BIK
VAMP3	-0.491616	7.1873	-1.83219	0.0723781	0.995998	-4.14604	NOT	VAMP3
ROCK1	0.201353	3.39901	1.83217	0.0723798	0.995998	-4.14605	NOT	ROCK1
AUP1	0.232447	7.79389	1.83181	0.0724348	0.995998	-4.14634	NOT	AUP1
PHLDA3	0.379095	4.08437	1.83168	0.0724539	0.995998	-4.14644	NOT	PHLDA3
SMURF2	-0.304217	5.32866	-1.83005	0.0727014	0.995998	-4.14774	NOT	SMURF2
RASA1	-0.381581	6.71985	-1.82999	0.07271	0.995998	-4.14779	NOT	RASA1
RBM45	-0.274828	6.53533	-1.82991	0.0727228	0.995998	-4.14785	NOT	RBM45
TSGA13	0.109802	3.2292	1.82939	0.0728014	0.995998	-4.14827	NOT	TSGA13
CHMP4C	-0.782759	4.59009	-1.82933	0.072811	0.995998	-4.14832	NOT	CHMP4C
KRT80	-0.553953	3.57394	-1.82885	0.0728835	0.995998	-4.1487	NOT	KRT80
OR4C13	0.115882	3.00871	1.8286	0.0729221	0.995998	-4.1489	NOT	OR4C13
DUSP23	-0.938231	8.22902	-1.82831	0.0729658	0.995998	-4.14913	NOT	DUSP23
HERC3	-0.0891604	3.15573	-1.82811	0.0729962	0.995998	-4.14929	NOT	HERC3
GPR150	-0.115332	3.21467	-1.82725	0.0731278	0.995998	-4.14997	NOT	GPR150
OR2J3	0.120808	3.15597	1.82721	0.0731335	0.995998	-4.15	NOT	OR2J3
KIAA0930	0.33402	4.95885	1.82703	0.0731613	0.995998	-4.15015	NOT	KIAA0930
PCOLCE	0.126763	4.00247	1.82682	0.0731929	0.995998	-4.15031	NOT	PCOLCE
TWIST1	1.27275	5.79256	1.82636	0.0732642	0.995998	-4.15069	NOT	TWIST1
ZP2	0.0781379	3.04732	1.82632	0.0732698	0.995998	-4.15072	NOT	ZP2
TRO	0.863957	5.48862	1.82533	0.0734205	0.995998	-4.1515	NOT	TRO
ZNF470	0.247218	3.55145	1.82469	0.0735197	0.995998	-4.15202	NOT	ZNF470
SCRN3	-0.353944	4.02228	-1.82362	0.0736836	0.995998	-4.15286	NOT	SCRN3
RIBC1	0.108236	3.37292	1.8234	0.0737167	0.995998	-4.15304	NOT	RIBC1
SMARCC1	0.389975	8.14249	1.82339	0.0737186	0.995998	-4.15305	NOT	SMARCC1
HSBP1	-0.317424	10.86	-1.82293	0.0737885	0.995998	-4.15341	NOT	HSBP1
EMC3	-0.351802	8.7168	-1.82248	0.0738585	0.995998	-4.15377	NOT	EMC3
FSD2	-0.0867249	2.94725	-1.82227	0.0738909	0.995998	-4.15394	NOT	FSD2
ZNF256	-0.555158	5.84451	-1.82214	0.0739104	0.995998	-4.15404	NOT	ZNF256
TM4SF18	-0.0990299	2.92412	-1.82211	0.0739155	0.995998	-4.15406	NOT	TM4SF18
SLC6A16	0.13654	3.04615	1.82181	0.0739612	0.995998	-4.1543	NOT	SLC6A16
INHBB	-1.54463	5.58886	-1.82169	0.0739797	0.995998	-4.1544	NOT	INHBB
LIFR	-0.844265	4.87125	-1.82164	0.0739878	0.995998	-4.15444	NOT	LIFR
RESF1	-0.436708	4.27542	-1.8216	0.0739939	0.995998	-4.15447	NOT	RESF1
SYNGR1	0.443827	4.0917	1.82149	0.0740112	0.995998	-4.15456	NOT	SYNGR1
TMCO4	-0.493848	4.21645	-1.82044	0.0741722	0.995998	-4.15539	NOT	TMCO4
GLP2R	-0.0826477	2.85529	-1.82035	0.0741866	0.995998	-4.15546	NOT	GLP2R
UTY	0.160545	3.03167	1.8196	0.0743022	0.995998	-4.15606	NOT	UTY
CYTH2	-0.304702	5.31804	-1.81953	0.0743137	0.995998	-4.15611	NOT	CYTH2
SPTA1	-0.147727	3.26427	-1.81937	0.0743374	0.995998	-4.15624	NOT	SPTA1
YWHAZ	-0.231599	11.7069	-1.81934	0.0743423	0.995998	-4.15626	NOT	YWHAZ
RPP30	0.170668	3.64267	1.81911	0.0743784	0.995998	-4.15645	NOT	RPP30
BIRC3	-0.729127	3.48012	-1.81831	0.0745017	0.995998	-4.15708	NOT	BIRC3
FGF13	0.963477	4.15083	1.81822	0.0745152	0.995998	-4.15715	NOT	FGF13
SCN8A	0.133879	3.16943	1.81822	0.0745159	0.995998	-4.15715	NOT	SCN8A
MPDZ	0.690957	6.83722	1.81818	0.0745228	0.995998	-4.15719	NOT	MPDZ
ELMO3	-0.336056	4.04376	-1.81798	0.0745534	0.995998	-4.15734	NOT	ELMO3
LINC01098	0.085978	2.81329	1.81743	0.0746377	0.995998	-4.15777	NOT	LINC01098
NPFF	0.201192	3.55934	1.8174	0.0746438	0.995998	-4.1578	NOT	NPFF
GRIPAP1	0.307112	5.49431	1.8172	0.0746748	0.995998	-4.15796	NOT	GRIPAP1
PRKY	0.295982	3.3671	1.81714	0.0746841	0.995998	-4.15801	NOT	PRKY
PPP1R3C	0.775848	4.69444	1.81686	0.0747269	0.995998	-4.15823	NOT	PPP1R3C
DUSP2	0.813664	4.78322	1.81686	0.0747271	0.995998	-4.15823	NOT	DUSP2
PRDM5	-0.119004	3.18724	-1.81652	0.0747792	0.995998	-4.1585	NOT	PRDM5
KRTAP10-4	0.0732829	2.85453	1.81591	0.0748742	0.995998	-4.15898	NOT	KRTAP10-4
SMIM3	-0.2279	3.33289	-1.81556	0.0749292	0.995998	-4.15926	NOT	SMIM3
TRAPPC1	0.402855	4.97398	1.81509	0.0750023	0.995998	-4.15963	NOT	TRAPPC1
GRID1	0.109552	3.08161	1.81451	0.0750928	0.995998	-4.16009	NOT	GRID1
AP1B1	0.235614	5.24766	1.81445	0.0751021	0.995998	-4.16014	NOT	AP1B1
CNOT7	0.311087	8.97223	1.81441	0.0751088	0.995998	-4.16017	NOT	CNOT7
SLC35F5	-0.476099	5.73423	-1.81433	0.0751203	0.995998	-4.16023	NOT	SLC35F5
OR5I1	-0.0956359	3.01247	-1.81404	0.0751653	0.995998	-4.16046	NOT	OR5I1
PIP4K2C	-0.513899	7.56818	-1.81243	0.0754169	0.995998	-4.16173	NOT	PIP4K2C
TGFA	-0.146583	3.4158	-1.81153	0.0755579	0.995998	-4.16245	NOT	TGFA
POU5F1P3	-0.144772	2.72698	-1.81143	0.0755742	0.995998	-4.16253	NOT	POU5F1P3
MOXD1	0.729619	3.67162	1.80791	0.076128	0.995998	-4.16531	NOT	MOXD1
SUSD6	-0.560214	7.74465	-1.80614	0.0764075	0.995998	-4.16671	NOT	SUSD6
IL1A	-0.286111	3.39525	-1.80599	0.0764306	0.995998	-4.16682	NOT	IL1A
ZNRF3	0.403419	5.59861	1.80579	0.076463	0.995998	-4.16698	NOT	ZNRF3
PDSS1	0.508693	7.04649	1.80431	0.0766981	0.995998	-4.16815	NOT	PDSS1
OR10AG1	0.0833946	3.00466	1.80356	0.0768169	0.995998	-4.16874	NOT	OR10AG1
CNTN3	0.597197	3.80134	1.80327	0.0768624	0.995998	-4.16897	NOT	CNTN3
SBF2	0.344492	5.40437	1.80304	0.0768999	0.995998	-4.16915	NOT	SBF2
CPT1C	0.636204	5.24447	1.80206	0.077056	0.995998	-4.16992	NOT	CPT1C
SMG7	0.258674	5.06205	1.80205	0.0770572	0.995998	-4.16993	NOT	SMG7
NEMP2	-0.224408	3.61599	-1.80203	0.0770607	0.995998	-4.16995	NOT	NEMP2
MAPK8IP2	0.510028	4.92554	1.80187	0.0770853	0.995998	-4.17007	NOT	MAPK8IP2
EMC2	-0.472132	6.91884	-1.80178	0.0771	0.995998	-4.17014	NOT	EMC2
WT1	-0.192349	3.0515	-1.80123	0.0771881	0.995998	-4.17058	NOT	WT1
SMURF1	-0.144098	3.83787	-1.80088	0.0772436	0.995998	-4.17085	NOT	SMURF1
ITGAM	-0.210314	2.81172	-1.80045	0.0773131	0.995998	-4.17119	NOT	ITGAM
ABCG2	-0.228964	3.13531	-1.80016	0.0773587	0.995998	-4.17142	NOT	ABCG2
WDR7	0.211714	3.83339	1.79947	0.0774698	0.995998	-4.17196	NOT	WDR7
RPL3	0.175235	4.18672	1.79944	0.0774732	0.995998	-4.17198	NOT	RPL3
ZNF528	0.195598	3.4729	1.79905	0.0775361	0.995998	-4.17229	NOT	ZNF528
EXOC1	-0.271517	6.93714	-1.79903	0.0775392	0.995998	-4.1723	NOT	EXOC1
TTC30B	-0.322924	3.78189	-1.7986	0.0776081	0.995998	-4.17264	NOT	TTC30B
PANX1	-0.395608	5.26596	-1.79804	0.0776987	0.995998	-4.17308	NOT	PANX1
RABEP2	-0.150628	3.72113	-1.79781	0.0777354	0.995998	-4.17326	NOT	RABEP2
OR9I1	-0.104767	3.38608	-1.79742	0.0777982	0.995998	-4.17357	NOT	OR9I1
COX6C	-0.221712	9.93444	-1.7972	0.0778332	0.995998	-4.17374	NOT	COX6C
RNF34	-0.251174	5.90974	-1.79713	0.0778447	0.995998	-4.1738	NOT	RNF34
SSU72	-0.351148	8.19694	-1.79627	0.0779835	0.995998	-4.17448	NOT	SSU72
FAM30A	-0.293762	3.20838	-1.79609	0.078012	0.995998	-4.17462	NOT	FAM30A
MAP4	0.239734	4.76952	1.79593	0.0780373	0.995998	-4.17474	NOT	MAP4
FBXW8	0.153886	4.23324	1.79522	0.0781526	0.995998	-4.1753	NOT	FBXW8
IPO9	0.337634	6.36855	1.79509	0.0781723	0.995998	-4.1754	NOT	IPO9
LINC00885	-0.157227	2.89482	-1.7949	0.0782044	0.995998	-4.17555	NOT	LINC00885
EIF4ENIF1	0.315325	5.85872	1.79475	0.0782272	0.995998	-4.17566	NOT	EIF4ENIF1
CBL	0.292806	4.41222	1.79443	0.0782798	0.995998	-4.17592	NOT	CBL
CLDN19	0.0895359	3.17185	1.79439	0.0782857	0.995998	-4.17595	NOT	CLDN19
BCKDK	0.329357	5.0926	1.79407	0.078337	0.995998	-4.1762	NOT	BCKDK
UEVLD	-0.261942	4.08463	-1.79347	0.0784341	0.995998	-4.17667	NOT	UEVLD
SLC6A4	0.0765354	3.06557	1.7933	0.078463	0.995998	-4.17681	NOT	SLC6A4
SQSTM1	-0.623965	7.80684	-1.793	0.0785106	0.995998	-4.17704	NOT	SQSTM1
KIF18A	-0.457586	6.63987	-1.79288	0.0785309	0.995998	-4.17714	NOT	KIF18A
KLHL31	-0.0933772	3.20071	-1.7924	0.0786088	0.995998	-4.17751	NOT	KLHL31
DENND2D	-0.979864	4.84097	-1.79207	0.0786617	0.995998	-4.17777	NOT	DENND2D
IRAK2	-0.261385	3.03641	-1.79173	0.0787159	0.995998	-4.17803	NOT	IRAK2
CRIM1	-0.461822	3.30793	-1.79144	0.0787636	0.995998	-4.17826	NOT	CRIM1
SIGLECL1	0.0874585	2.98796	1.79068	0.0788865	0.995998	-4.17885	NOT	SIGLECL1
HK2	0.919763	6.12238	1.78915	0.0791365	0.995998	-4.18006	NOT	HK2
STK11IP	-0.110163	3.37753	-1.78912	0.0791414	0.995998	-4.18008	NOT	STK11IP
WFDC6	-0.330348	4.1717	-1.7887	0.0792098	0.995998	-4.18041	NOT	WFDC6
LINC00477	0.0767312	2.71143	1.78856	0.0792324	0.995998	-4.18052	NOT	LINC00477
SAMD1	0.346001	5.11936	1.78838	0.0792615	0.995998	-4.18066	NOT	SAMD1
OR52I1	-0.111363	2.84326	-1.78789	0.0793419	0.995998	-4.18104	NOT	OR52I1
NABP2	0.350033	6.63976	1.78647	0.0795746	0.995998	-4.18216	NOT	NABP2
TTC7B	0.668516	5.53685	1.78629	0.0796026	0.995998	-4.18229	NOT	TTC7B
TRAPPC2	0.169858	3.52069	1.78583	0.0796794	0.995998	-4.18266	NOT	TRAPPC2
MIGA2	-0.155822	3.86539	-1.78515	0.0797908	0.995998	-4.18319	NOT	MIGA2
RPS28	0.514799	5.4057	1.78512	0.0797947	0.995998	-4.1832	NOT	RPS28
GUCA2A	0.151889	3.14378	1.78509	0.0797998	0.995998	-4.18323	NOT	GUCA2A
FAM160A1	-0.116605	3.442	-1.78486	0.0798375	0.995998	-4.18341	NOT	FAM160A1
WDR1	-0.409614	6.21444	-1.7846	0.0798803	0.995998	-4.18361	NOT	WDR1
OR5D18	-0.0775196	2.88408	-1.78446	0.079904	0.995998	-4.18372	NOT	OR5D18
GTSF1	1.3562	4.20629	1.78445	0.0799046	0.995998	-4.18373	NOT	GTSF1
NPAS2	-0.300317	3.43129	-1.78407	0.0799677	0.995998	-4.18403	NOT	NPAS2
CASP4	-1.02389	4.82538	-1.78281	0.0801746	0.995998	-4.18501	NOT	CASP4
SRRM3	0.281412	3.64084	1.7825	0.0802267	0.995998	-4.18526	NOT	SRRM3
TBC1D7	-0.470103	7.73118	-1.78186	0.0803314	0.995998	-4.18575	NOT	TBC1D7
TBC1D7-LOC100130357	-0.470103	7.73118	-1.78186	0.0803314	0.995998	-4.18575	NOT	TBC1D7-LOC100130357
ITPR1	0.489598	3.854	1.78151	0.08039	0.995998	-4.18603	NOT	ITPR1
XRCC3	0.152893	3.48121	1.78145	0.0803988	0.995998	-4.18607	NOT	XRCC3
TSC22D4	0.148241	3.52873	1.78129	0.0804252	0.995998	-4.18619	NOT	TSC22D4
ZNF189	-0.41266	6.34998	-1.78104	0.0804675	0.995998	-4.18639	NOT	ZNF189
TTC1	-0.301689	8.17443	-1.78073	0.0805182	0.995998	-4.18663	NOT	TTC1
IMPDH1	0.395075	5.89104	1.78061	0.0805381	0.995998	-4.18673	NOT	IMPDH1
FIGN	-0.548103	3.63731	-1.78059	0.0805414	0.995998	-4.18674	NOT	FIGN
GRHL1	-0.385357	4.09084	-1.78018	0.0806088	0.995998	-4.18706	NOT	GRHL1
FGFRL1	-0.137805	3.59717	-1.77915	0.0807804	0.995998	-4.18787	NOT	FGFRL1
AGAP3	0.293627	5.38972	1.7791	0.0807876	0.995998	-4.1879	NOT	AGAP3
SKIDA1	0.154283	3.1665	1.77904	0.0807979	0.995998	-4.18795	NOT	SKIDA1
FAM162A	0.307182	3.4618	1.77768	0.0810247	0.995998	-4.18901	NOT	FAM162A
MRPS31	0.436748	7.11118	1.77662	0.0812004	0.995998	-4.18984	NOT	MRPS31
YIPF5	-0.343333	7.39754	-1.77657	0.0812079	0.995998	-4.18987	NOT	YIPF5
TCF4	0.975982	7.54215	1.77539	0.0814054	0.995998	-4.19079	NOT	TCF4
ZNF142	-0.305019	4.85902	-1.77474	0.0815132	0.995998	-4.19129	NOT	ZNF142
MB	-0.663554	3.94309	-1.77454	0.0815466	0.995998	-4.19145	NOT	MB
HDHD3	-0.321067	4.79881	-1.77313	0.0817832	0.995998	-4.19255	NOT	HDHD3
ADARB2-AS1	-0.177398	3.2665	-1.77225	0.0819302	0.995998	-4.19323	NOT	ADARB2-AS1
RNF152	0.160608	3.17816	1.77222	0.0819354	0.995998	-4.19325	NOT	RNF152
ATE1	0.228754	3.73866	1.77163	0.0820353	0.995998	-4.19372	NOT	ATE1
CLK3	0.113103	3.69579	1.7709	0.0821569	0.995998	-4.19428	NOT	CLK3
LZTS3	-0.743802	5.23891	-1.77048	0.0822279	0.995998	-4.1946	NOT	LZTS3
KANSL1L	-0.140282	3.83239	-1.76995	0.0823171	0.995998	-4.19502	NOT	KANSL1L
MISP	-0.4434	3.98121	-1.76993	0.0823213	0.995998	-4.19503	NOT	MISP
TNC	0.822557	3.80877	1.76982	0.0823392	0.995998	-4.19512	NOT	TNC
UBA6	-0.228468	5.81005	-1.76863	0.0825389	0.995998	-4.19604	NOT	UBA6
LYPD6B	-0.531453	4.31092	-1.76857	0.0825505	0.995998	-4.19609	NOT	LYPD6B
SMIM14	-0.615442	7.16188	-1.76829	0.0825979	0.995998	-4.19631	NOT	SMIM14
NLGN4X	0.834166	4.08779	1.76827	0.0826003	0.995998	-4.19632	NOT	NLGN4X
CLDN1	-0.764412	3.99332	-1.76777	0.082685	0.995998	-4.19671	NOT	CLDN1
ANXA10	-0.689493	3.20842	-1.76734	0.082758	0.995998	-4.19704	NOT	ANXA10
C1orf229	-0.217556	3.38867	-1.76671	0.0828642	0.995998	-4.19753	NOT	C1orf229
ALKAL2	-0.567111	3.8248	-1.76529	0.083105	0.995998	-4.19863	NOT	ALKAL2
CDC20	-0.381437	7.46633	-1.76521	0.0831191	0.995998	-4.19869	NOT	CDC20
KCTD3	0.38735	8.58842	1.7649	0.0831708	0.995998	-4.19893	NOT	KCTD3
PI3	-0.430805	3.43586	-1.7649	0.0831708	0.995998	-4.19893	NOT	PI3
CCDC28B	0.598228	7.53027	1.76439	0.0832585	0.995998	-4.19933	NOT	CCDC28B
OTUD5	0.196081	4.58963	1.7641	0.0833081	0.995998	-4.19955	NOT	OTUD5
CSN1S1	-0.113483	2.96446	-1.76387	0.0833461	0.995998	-4.19972	NOT	CSN1S1
FAM83D	-0.452685	8.4833	-1.76379	0.0833599	0.995998	-4.19979	NOT	FAM83D
MRPL50	-0.246188	5.04079	-1.76327	0.0834484	0.995998	-4.20019	NOT	MRPL50
GPR31	0.123671	3.3232	1.7629	0.0835113	0.995998	-4.20047	NOT	GPR31
BRPF3	-0.332464	5.29194	-1.76279	0.0835305	0.995998	-4.20056	NOT	BRPF3
CACNB2	0.119848	3.14561	1.76272	0.0835416	0.995998	-4.20061	NOT	CACNB2
PHLDA2	-0.865785	4.21907	-1.7618	0.0836986	0.995998	-4.20132	NOT	PHLDA2
LOC105376114	-0.263365	4.23393	-1.76175	0.0837082	0.995998	-4.20137	NOT	LOC105376114
NABP1	-0.411414	3.58852	-1.76155	0.0837426	0.995998	-4.20152	NOT	NABP1
MAP4K2	-0.160022	3.71857	-1.76149	0.0837518	0.995998	-4.20156	NOT	MAP4K2
BTAF1	0.373323	7.32204	1.76044	0.083931	0.995998	-4.20237	NOT	BTAF1
PYDC2	0.078417	3.28085	1.76041	0.0839368	0.995998	-4.2024	NOT	PYDC2
ITGA10	-0.399186	3.13188	-1.76039	0.0839398	0.995998	-4.20241	NOT	ITGA10
FAM193B	-0.289008	6.5408	-1.76015	0.0839822	0.995998	-4.2026	NOT	FAM193B
ZNHIT1	0.299666	9.30065	1.75984	0.0840341	0.995998	-4.20284	NOT	ZNHIT1
KLHDC4	-0.424968	6.44806	-1.7598	0.0840421	0.995998	-4.20287	NOT	KLHDC4
SIM1	-0.114302	2.89392	-1.75966	0.0840659	0.995998	-4.20298	NOT	SIM1
TGS1	0.279528	6.51254	1.7596	0.084076	0.995998	-4.20303	NOT	TGS1
EGF	-0.28267	3.06169	-1.75956	0.084083	0.995998	-4.20306	NOT	EGF
WDR18	0.354047	7.16415	1.75947	0.0840985	0.995998	-4.20313	NOT	WDR18
OR4C46	0.279349	3.3372	1.75901	0.0841765	0.995998	-4.20348	NOT	OR4C46
SAP18	0.452999	7.3507	1.75874	0.0842239	0.995998	-4.20369	NOT	SAP18
PTGIS	-0.106124	3.14299	-1.75873	0.0842256	0.995998	-4.2037	NOT	PTGIS
GGN	0.152459	3.24519	1.75834	0.0842912	0.995998	-4.20399	NOT	GGN
NRXN2	0.660152	4.36652	1.75832	0.0842951	0.995998	-4.20401	NOT	NRXN2
MTRF1	0.286536	4.1666	1.75832	0.0842959	0.995998	-4.20402	NOT	MTRF1
SHMT2	0.545369	8.9105	1.75787	0.084373	0.995998	-4.20436	NOT	SHMT2
ATL3	-0.676066	6.88493	-1.75745	0.0844456	0.995998	-4.20469	NOT	ATL3
STUM	0.101807	2.91955	1.75735	0.0844618	0.995998	-4.20476	NOT	STUM
ZNF706	-0.500967	7.24215	-1.75693	0.0845336	0.995998	-4.20508	NOT	ZNF706
FBXO16	0.415222	5.11601	1.75654	0.0846022	0.995998	-4.20539	NOT	FBXO16
HOMER3	-0.549766	4.25654	-1.75647	0.0846134	0.995998	-4.20544	NOT	HOMER3
PCK2	0.63033	5.85751	1.75625	0.0846519	0.995998	-4.20561	NOT	PCK2
TMEM184C	-0.258385	6.23113	-1.75623	0.0846552	0.995998	-4.20563	NOT	TMEM184C
OR5M10	0.0658251	2.94211	1.75569	0.0847479	0.995998	-4.20604	NOT	OR5M10
NSUN5P1	0.381445	5.95853	1.75561	0.0847627	0.995998	-4.20611	NOT	NSUN5P1
CYP2J2	-0.591218	4.04214	-1.75399	0.0850421	0.995998	-4.20735	NOT	CYP2J2
MVB12B	-0.137092	3.589	-1.75335	0.0851522	0.995998	-4.20784	NOT	MVB12B
CALM2	-0.15149	11.8479	-1.75249	0.0853011	0.995998	-4.2085	NOT	CALM2
VWA2	-0.120315	2.8841	-1.75223	0.0853474	0.995998	-4.20871	NOT	VWA2
SLC22A2	-0.069598	3.22296	-1.75194	0.0853973	0.995998	-4.20893	NOT	SLC22A2
TLE3	0.4067	5.15299	1.75135	0.0854996	0.995998	-4.20938	NOT	TLE3
PQLC3	-0.751094	5.4057	-1.75092	0.0855744	0.995998	-4.20971	NOT	PQLC3
ERN2	0.0875964	3.31908	1.75019	0.0857023	0.995998	-4.21028	NOT	ERN2
B4GALT4	-0.449844	5.66693	-1.74965	0.0857953	0.995998	-4.21069	NOT	B4GALT4
RHBDL2	0.101293	3.09626	1.74923	0.0858684	0.995998	-4.21101	NOT	RHBDL2
CALHM4	-0.123082	3.04781	-1.74817	0.0860541	0.995998	-4.21182	NOT	CALHM4
TBC1D2B	0.308918	5.00717	1.74799	0.0860857	0.995998	-4.21196	NOT	TBC1D2B
HCFC1	0.0980456	3.67961	1.74766	0.0861432	0.995998	-4.21222	NOT	HCFC1
VPS13D	-0.296479	4.24592	-1.74719	0.0862248	0.995998	-4.21257	NOT	VPS13D
CT62	-0.113702	3.10472	-1.74713	0.086235	0.995998	-4.21262	NOT	CT62
NDUFS5	-0.374475	11.0298	-1.74694	0.0862694	0.995998	-4.21277	NOT	NDUFS5
ZRANB1	0.237552	5.57898	1.7464	0.086364	0.995998	-4.21318	NOT	ZRANB1
SPAST	-0.262965	5.18335	-1.74634	0.0863738	0.995998	-4.21323	NOT	SPAST
CAMKMT	0.231113	3.42605	1.7458	0.0864693	0.995998	-4.21364	NOT	CAMKMT
FBXO34	-0.291259	6.99905	-1.74532	0.0865533	0.995998	-4.21401	NOT	FBXO34
P3H4	0.525825	5.05737	1.74517	0.0865789	0.995998	-4.21412	NOT	P3H4
EIF4EBP1	0.45983	9.45245	1.74516	0.0865807	0.995998	-4.21413	NOT	EIF4EBP1
MAP1LC3A	-0.517591	4.03019	-1.74515	0.0865836	0.995998	-4.21414	NOT	MAP1LC3A
CPPED1	-0.677096	5.38762	-1.74511	0.0865905	0.995998	-4.21417	NOT	CPPED1
PYDC1	-0.224373	3.21587	-1.74479	0.0866455	0.995998	-4.21441	NOT	PYDC1
ROS1	-0.0807136	2.9	-1.74441	0.0867131	0.995998	-4.21471	NOT	ROS1
PLEKHA7	-0.200971	3.54225	-1.74433	0.0867268	0.995998	-4.21477	NOT	PLEKHA7
FHL3	0.237319	4.03171	1.74403	0.0867791	0.995998	-4.215	NOT	FHL3
INTS9	0.349852	5.41516	1.74281	0.0869953	0.995998	-4.21594	NOT	INTS9
SGO1	-0.238369	4.33619	-1.74267	0.08702	0.995998	-4.21604	NOT	SGO1
OR4A5	0.112516	3.3016	1.74266	0.0870215	0.995998	-4.21605	NOT	OR4A5
FAM171B	0.500489	4.91299	1.74233	0.0870794	0.995998	-4.2163	NOT	FAM171B
ARIH2	0.262396	8.14866	1.74221	0.0870998	0.995998	-4.21639	NOT	ARIH2
FBXO27	-0.712936	4.05737	-1.74179	0.0871745	0.995998	-4.21671	NOT	FBXO27
TIAL1	0.327924	8.23823	1.74123	0.087274	0.995998	-4.21714	NOT	TIAL1
ATXN3L	0.0788595	2.87962	1.74113	0.0872917	0.995998	-4.21722	NOT	ATXN3L
MLST8	0.338603	6.41199	1.74044	0.0874134	0.995998	-4.21775	NOT	MLST8
ALG2	-0.328856	5.50678	-1.74044	0.0874134	0.995998	-4.21775	NOT	ALG2
GBX1	-0.134195	3.41464	-1.73984	0.0875194	0.995998	-4.2182	NOT	GBX1
PTPN5	0.0821304	2.96604	1.73984	0.0875198	0.995998	-4.21821	NOT	PTPN5
C1orf198	-0.514386	7.879	-1.7392	0.087633	0.995998	-4.21869	NOT	C1orf198
SYDE2	-0.18044	3.51671	-1.73917	0.0876386	0.995998	-4.21872	NOT	SYDE2
IGDCC3	0.239652	3.11505	1.73905	0.0876604	0.995998	-4.21881	NOT	IGDCC3
WHAMM	-0.449981	5.43724	-1.73886	0.0876931	0.995998	-4.21895	NOT	WHAMM
TNKS	0.291226	4.87454	1.73858	0.0877432	0.995998	-4.21917	NOT	TNKS
SERPINE2	-0.855796	5.64174	-1.73838	0.0877793	0.995998	-4.21932	NOT	SERPINE2
WRAP73	0.401542	7.42015	1.73794	0.0878576	0.995998	-4.21966	NOT	WRAP73
TAS2R7	-0.0933018	3.07954	-1.73758	0.0879205	0.995998	-4.21993	NOT	TAS2R7
EN1	-0.413098	2.94493	-1.73744	0.0879461	0.995998	-4.22004	NOT	EN1
ZCWPW2	-0.126856	3.21437	-1.73599	0.0882039	0.995998	-4.22115	NOT	ZCWPW2
GK	0.522258	5.07504	1.73556	0.0882807	0.995998	-4.22147	NOT	GK
RELL1	-0.089279	2.97211	-1.73534	0.0883195	0.995998	-4.22164	NOT	RELL1
DBIL5P	0.139319	3.12788	1.73522	0.0883422	0.995998	-4.22174	NOT	DBIL5P
RAB1A	-0.233358	7.8811	-1.73432	0.0885021	0.995998	-4.22242	NOT	RAB1A
MYOZ2	-0.0694293	2.89854	-1.73432	0.0885023	0.995998	-4.22242	NOT	MYOZ2
IGSF9B	0.209504	3.44889	1.73391	0.0885758	0.995998	-4.22273	NOT	IGSF9B
CDC25C	-0.40846	6.58235	-1.73367	0.0886189	0.995998	-4.22292	NOT	CDC25C
PSMC6	-0.115706	3.31352	-1.7327	0.0887922	0.995998	-4.22365	NOT	PSMC6
NMNAT1	-0.38578	4.11342	-1.73259	0.0888117	0.995998	-4.22374	NOT	NMNAT1
SH3BP4	-0.356435	3.86895	-1.73238	0.0888494	0.995998	-4.2239	NOT	SH3BP4
NTM	0.863502	4.00313	1.73198	0.0889219	0.995998	-4.2242	NOT	NTM
KPRP	-0.113056	3.20839	-1.73194	0.0889285	0.995998	-4.22423	NOT	KPRP
CHAC2	0.489573	5.27605	1.73167	0.0889779	0.995998	-4.22444	NOT	CHAC2
PPP2R2D	0.405257	6.33793	1.73099	0.0890989	0.995998	-4.22496	NOT	PPP2R2D
OR6B1	0.0724199	2.81461	1.73094	0.0891084	0.995998	-4.225	NOT	OR6B1
ZNF75A	-0.405389	6.00825	-1.73034	0.089217	0.995998	-4.22545	NOT	ZNF75A
TMEM87B	-0.337958	4.13693	-1.73025	0.0892324	0.995998	-4.22552	NOT	TMEM87B
CERS4	-0.706971	4.3523	-1.7297	0.0893321	0.995998	-4.22594	NOT	CERS4
CCNI	-0.305955	10.0977	-1.72968	0.0893359	0.995998	-4.22596	NOT	CCNI
MT1E	-0.903164	4.31938	-1.7293	0.0894039	0.995998	-4.22624	NOT	MT1E
CACFD1	-0.113315	3.45072	-1.72922	0.0894185	0.995998	-4.22631	NOT	CACFD1
SNRNP48	-0.361552	5.23671	-1.72866	0.0895192	0.995998	-4.22673	NOT	SNRNP48
HSF5	0.0625422	2.84332	1.7285	0.0895477	0.995998	-4.22685	NOT	HSF5
GLUD1	0.383371	8.13903	1.72798	0.0896432	0.995998	-4.22725	NOT	GLUD1
PLGLB2	0.224916	2.88886	1.72791	0.0896546	0.995998	-4.2273	NOT	PLGLB2
ISG20	-1.04824	5.30001	-1.72709	0.0898042	0.995998	-4.22793	NOT	ISG20
CHGB	1.11044	6.39701	1.7267	0.0898746	0.995998	-4.22822	NOT	CHGB
HAPLN1	-0.551303	3.26715	-1.72609	0.0899845	0.995998	-4.22868	NOT	HAPLN1
SH2B2	0.144316	3.41347	1.72497	0.0901886	0.995998	-4.22954	NOT	SH2B2
RBMXL3	0.070731	2.87268	1.72487	0.0902054	0.995998	-4.22961	NOT	RBMXL3
CHIC2	-0.418844	6.59975	-1.72477	0.0902241	0.995998	-4.22969	NOT	CHIC2
NUDCD1	-0.412476	7.08546	-1.72466	0.0902445	0.995998	-4.22977	NOT	NUDCD1
MMS19	0.376712	6.46215	1.72383	0.0903957	0.995998	-4.2304	NOT	MMS19
EXOSC1	0.327212	8.74251	1.72278	0.0905866	0.995998	-4.2312	NOT	EXOSC1
TCEAL4	0.329344	9.74636	1.72271	0.0905986	0.995998	-4.23125	NOT	TCEAL4
FBXL5	-0.338315	8.834	-1.72267	0.090606	0.995998	-4.23128	NOT	FBXL5
PHLDB2	-0.62677	4.28259	-1.72208	0.0907142	0.995998	-4.23173	NOT	PHLDB2
CAVIN1	-0.327138	3.44094	-1.72185	0.0907555	0.995998	-4.2319	NOT	CAVIN1
MAPK8IP3	0.0935746	3.18341	1.72138	0.0908417	0.995998	-4.23226	NOT	MAPK8IP3
UGCG	-0.545238	7.79511	-1.72096	0.0909184	0.995998	-4.23257	NOT	UGCG
TMEM206	0.351081	8.33134	1.7207	0.0909657	0.995998	-4.23277	NOT	TMEM206
EXPH5	-0.397576	3.87284	-1.72026	0.0910476	0.995998	-4.23311	NOT	EXPH5
MAB21L2	-0.0908066	2.98188	-1.71987	0.0911186	0.995998	-4.2334	NOT	MAB21L2
TPO	-0.159435	3.15523	-1.71986	0.0911195	0.995998	-4.23341	NOT	TPO
ZNF74	0.313525	4.601	1.71964	0.0911613	0.995998	-4.23358	NOT	ZNF74
NOLC1	0.397311	7.25935	1.71956	0.0911753	0.995998	-4.23364	NOT	NOLC1
FLOT2	0.265588	4.37335	1.71952	0.0911834	0.995998	-4.23367	NOT	FLOT2
TLX1NB	-0.0768513	3.16244	-1.71941	0.0912028	0.995998	-4.23375	NOT	TLX1NB
CLDN4	-1.21678	6.12318	-1.71834	0.0913983	0.995998	-4.23456	NOT	CLDN4
GCM1	-0.0806382	3.00581	-1.71785	0.0914884	0.995998	-4.23493	NOT	GCM1
P2RX4	-0.479146	5.18895	-1.71737	0.0915774	0.995998	-4.23529	NOT	P2RX4
IGFBP2	1.15438	8.69383	1.71717	0.0916139	0.995998	-4.23544	NOT	IGFBP2
EIF2AK3	-0.363342	5.65459	-1.71701	0.0916444	0.995998	-4.23557	NOT	EIF2AK3
LMLN	-0.551535	5.41095	-1.71511	0.0919937	0.995998	-4.237	NOT	LMLN
GADD45B	-0.697705	4.66697	-1.71507	0.0920008	0.995998	-4.23703	NOT	GADD45B
SEC16A	-0.153621	3.81766	-1.71457	0.0920941	0.995998	-4.23741	NOT	SEC16A
SLC9A3R2	-0.136617	3.19138	-1.71406	0.0921876	0.995998	-4.23779	NOT	SLC9A3R2
NES	0.501473	3.83841	1.71385	0.0922272	0.995998	-4.23796	NOT	NES
TRABD2A	0.178111	2.98358	1.71384	0.0922296	0.995998	-4.23797	NOT	TRABD2A
LOC105374836	0.178111	2.98358	1.71384	0.0922296	0.995998	-4.23797	NOT	LOC105374836
OR7A10	-0.0810892	2.88697	-1.71348	0.0922947	0.995998	-4.23823	NOT	OR7A10
NAP1L2	-0.337982	3.13438	-1.71257	0.0924636	0.995998	-4.23892	NOT	NAP1L2
ABCC12	-0.0646794	2.80097	-1.71215	0.0925429	0.995998	-4.23924	NOT	ABCC12
ZNF846	-0.0604882	2.8787	-1.71165	0.092634	0.995998	-4.23961	NOT	ZNF846
LOC100505555	-0.0604882	2.8787	-1.71165	0.092634	0.995998	-4.23961	NOT	LOC100505555
ARHGAP32	0.546385	6.78937	1.71073	0.0928062	0.995998	-4.24031	NOT	ARHGAP32
TGM1	-0.138248	3.3979	-1.71068	0.0928153	0.995998	-4.24035	NOT	TGM1
CCDC189	0.466649	5.04091	1.71066	0.092819	0.995998	-4.24036	NOT	CCDC189
ZNF853	0.753405	5.54802	1.71031	0.0928833	0.995998	-4.24062	NOT	ZNF853
EPAS1	-0.417807	4.28401	-1.7101	0.0929222	0.995998	-4.24078	NOT	EPAS1
ABCB7	0.375121	9.07547	1.70971	0.0929958	0.995998	-4.24108	NOT	ABCB7
CCDC136	0.506749	4.35171	1.70934	0.0930652	0.995998	-4.24136	NOT	CCDC136
EXOC6B	0.171989	3.9711	1.70859	0.0932051	0.995998	-4.24192	NOT	EXOC6B
GPR17	0.0640271	2.9026	1.70854	0.0932145	0.995998	-4.24196	NOT	GPR17
SFTPD	0.149616	3.24745	1.70804	0.0933078	0.995998	-4.24234	NOT	SFTPD
CTPS2	0.413195	6.38678	1.70782	0.0933489	0.995998	-4.2425	NOT	CTPS2
SH2D3A	-0.480417	3.56096	-1.70769	0.0933728	0.995998	-4.2426	NOT	SH2D3A
REG1A	-0.444065	3.24327	-1.70756	0.0933971	0.995998	-4.2427	NOT	REG1A
ZMAT2	-0.276626	8.27725	-1.70675	0.093548	0.995998	-4.2433	NOT	ZMAT2
KLF17	0.0894959	2.96416	1.70652	0.0935921	0.995998	-4.24348	NOT	KLF17
HOXB3	-0.46381	3.94003	-1.70576	0.0937346	0.995998	-4.24405	NOT	HOXB3
TXNRD1	-0.511562	7.76717	-1.7053	0.0938206	0.995998	-4.2444	NOT	TXNRD1
C19orf38	-0.223162	3.41059	-1.70443	0.093983	0.995998	-4.24505	NOT	C19orf38
KRTAP13-3	-0.0707938	2.86931	-1.70376	0.0941099	0.995998	-4.24555	NOT	KRTAP13-3
CETN3	-0.55228	7.8006	-1.70375	0.094111	0.995998	-4.24556	NOT	CETN3
IER3IP1	0.33311	9.43731	1.7033	0.0941966	0.995998	-4.2459	NOT	IER3IP1
MS4A2	0.0766565	2.90058	1.70318	0.0942197	0.995998	-4.24599	NOT	MS4A2
GOSR1	-0.164919	5.63312	-1.70292	0.0942684	0.995998	-4.24619	NOT	GOSR1
GAMT	0.566837	6.76817	1.70272	0.0943059	0.995998	-4.24634	NOT	GAMT
FBXO10	0.366147	4.2731	1.70247	0.0943536	0.995998	-4.24653	NOT	FBXO10
KIT	-0.615088	3.99183	-1.70233	0.0943802	0.995998	-4.24663	NOT	KIT
CNTRL	-0.424314	6.38798	-1.70216	0.0944119	0.995998	-4.24676	NOT	CNTRL
MXD4	-0.341306	5.04594	-1.70177	0.0944853	0.995998	-4.24705	NOT	MXD4
NPR2	0.482561	4.37979	1.70158	0.0945202	0.995998	-4.24719	NOT	NPR2
TMEM9B	-0.40481	7.33914	-1.70121	0.0945916	0.995998	-4.24747	NOT	TMEM9B
STPG3	0.0931676	3.39507	1.69998	0.0948231	0.995998	-4.24839	NOT	STPG3
BHLHE22	0.62276	3.89462	1.69889	0.0950298	0.995998	-4.24921	NOT	BHLHE22
SP140L	-0.324695	3.67229	-1.69877	0.0950521	0.995998	-4.2493	NOT	SP140L
AMOT	0.49187	3.93041	1.69876	0.0950551	0.995998	-4.24931	NOT	AMOT
SLC5A12	-0.118559	3.0166	-1.69875	0.0950559	0.995998	-4.24931	NOT	SLC5A12
GP1BA	-0.118892	3.23657	-1.69875	0.0950566	0.995998	-4.24931	NOT	GP1BA
EEFSEC	0.275421	5.09723	1.6987	0.0950651	0.995998	-4.24935	NOT	EEFSEC
TMEM132B	-0.0800116	3.03086	-1.69844	0.0951161	0.995998	-4.24955	NOT	TMEM132B
CPB1	-0.433094	3.1377	-1.69834	0.0951335	0.995998	-4.24962	NOT	CPB1
RHOBTB3	-0.656571	7.73356	-1.69831	0.0951392	0.995998	-4.24964	NOT	RHOBTB3
DERA	-0.442549	8.86234	-1.69806	0.0951876	0.995998	-4.24983	NOT	DERA
GZMA	0.106319	3.24968	1.69717	0.0953574	0.995998	-4.2505	NOT	GZMA
PPM1K	-0.223484	3.34613	-1.69682	0.0954225	0.995998	-4.25076	NOT	PPM1K
RPA2	0.327948	9.67368	1.69675	0.0954367	0.995998	-4.25081	NOT	RPA2
DNAH1	-0.249406	3.93001	-1.69656	0.0954722	0.995998	-4.25095	NOT	DNAH1
GFM2	-0.351564	6.47348	-1.69647	0.0954896	0.995998	-4.25102	NOT	GFM2
BRDT	-0.304062	3.00791	-1.69611	0.0955592	0.995998	-4.25129	NOT	BRDT
ARHGAP5	-0.460301	6.58716	-1.69605	0.0955706	0.995998	-4.25134	NOT	ARHGAP5
SLC7A4	0.098092	3.08193	1.69504	0.0957626	0.995998	-4.25209	NOT	SLC7A4
ZNF688	-0.247145	4.90591	-1.69471	0.0958247	0.995998	-4.25233	NOT	ZNF688
PRR3	0.413717	5.75027	1.69471	0.0958249	0.995998	-4.25234	NOT	PRR3
ZSCAN5A	-0.334574	4.01136	-1.69448	0.0958689	0.995998	-4.25251	NOT	ZSCAN5A
CEL	-1.01782	4.2915	-1.69439	0.0958864	0.995998	-4.25258	NOT	CEL
NUDT10	0.648169	3.39878	1.69429	0.0959062	0.995998	-4.25265	NOT	NUDT10
TBC1D20	0.200535	6.72292	1.69419	0.0959248	0.995998	-4.25273	NOT	TBC1D20
NPVF	0.0998861	2.85928	1.69388	0.0959838	0.995998	-4.25296	NOT	NPVF
IAH1	0.355828	5.19291	1.69376	0.0960074	0.995998	-4.25305	NOT	IAH1
POU1F1	-0.0560276	2.79253	-1.69344	0.0960675	0.995998	-4.25328	NOT	POU1F1
MOB4	-0.27513	8.4576	-1.69337	0.0960812	0.995998	-4.25334	NOT	MOB4
SPP1	-1.23759	4.14926	-1.69317	0.09612	0.995998	-4.25349	NOT	SPP1
RP1L1	0.107063	2.99297	1.69307	0.0961396	0.995998	-4.25357	NOT	RP1L1
KCTD13	0.152767	3.81241	1.69218	0.0963097	0.995998	-4.25423	NOT	KCTD13
SPINK8	-0.106089	3.12024	-1.69197	0.0963501	0.995998	-4.25439	NOT	SPINK8
SMARCAD1	-0.375734	7.2608	-1.691	0.0965367	0.995998	-4.25511	NOT	SMARCAD1
SGSM2	0.184576	4.42759	1.69068	0.096597	0.995998	-4.25535	NOT	SGSM2
FBXL2	-0.26042	3.59476	-1.69043	0.0966466	0.995998	-4.25554	NOT	FBXL2
CYP4F11	-0.180229	3.13535	-1.69006	0.0967161	0.995998	-4.25581	NOT	CYP4F11
CHD1L	0.378373	7.1194	1.68984	0.0967601	0.995998	-4.25598	NOT	CHD1L
CAVIN4	0.379141	3.84076	1.68983	0.0967612	0.995998	-4.25598	NOT	CAVIN4
TMEM167A	-0.369762	8.93916	-1.68968	0.0967912	0.995998	-4.2561	NOT	TMEM167A
DRC1	-0.31012	3.51871	-1.68951	0.0968223	0.995998	-4.25622	NOT	DRC1
NOL4L-DT	0.0966636	3.13933	1.68932	0.0968593	0.995998	-4.25636	NOT	NOL4L-DT
ARHGAP29	-0.520519	4.12744	-1.68808	0.097098	0.995998	-4.25729	NOT	ARHGAP29
OR6T1	0.0708814	3.00955	1.68788	0.0971375	0.995998	-4.25744	NOT	OR6T1
NME4	0.786009	7.681	1.68785	0.0971434	0.995998	-4.25746	NOT	NME4
HMGN5	0.950827	4.3791	1.68754	0.0972039	0.995998	-4.25769	NOT	HMGN5
CSN3	-0.118037	2.87041	-1.68739	0.0972327	0.995998	-4.25781	NOT	CSN3
VPS41	-0.284745	5.99384	-1.68732	0.0972459	0.995998	-4.25786	NOT	VPS41
LENG8	0.275344	4.92208	1.68717	0.0972749	0.995998	-4.25797	NOT	LENG8
PPP1R32	-0.181861	3.12017	-1.68715	0.0972784	0.995998	-4.25798	NOT	PPP1R32
USP11	0.470632	9.506	1.6871	0.0972886	0.995998	-4.25802	NOT	USP11
MMAB	-0.343511	6.3361	-1.68622	0.0974579	0.995998	-4.25867	NOT	MMAB
TEDDM1	0.0798156	3.06271	1.68621	0.0974594	0.995998	-4.25868	NOT	TEDDM1
RAB5IF	-0.248715	11.0687	-1.68603	0.0974949	0.995998	-4.25881	NOT	RAB5IF
LDLR	-0.586283	5.67943	-1.68599	0.0975029	0.995998	-4.25885	NOT	LDLR
SREK1	-0.374134	6.45476	-1.68574	0.0975509	0.995998	-4.25903	NOT	SREK1
BICRA	-0.264936	4.55617	-1.68502	0.0976901	0.995998	-4.25956	NOT	BICRA
CHADL	0.206055	3.60187	1.68464	0.0977646	0.995998	-4.25985	NOT	CHADL
OST4	-0.209001	10.9717	-1.68459	0.0977744	0.995998	-4.25989	NOT	OST4
INKA2	0.381582	4.35236	1.68456	0.0977803	0.995998	-4.25991	NOT	INKA2
MPP4	-0.236386	2.90301	-1.68422	0.0978463	0.995998	-4.26016	NOT	MPP4
ARHGDIA	0.372714	5.76202	1.68403	0.0978828	0.995998	-4.2603	NOT	ARHGDIA
ZNF253	-0.484365	4.39861	-1.68396	0.0978964	0.995998	-4.26035	NOT	ZNF253
NRG4	-0.527218	3.40305	-1.68366	0.0979548	0.995998	-4.26058	NOT	NRG4
QPRT	1.29706	6.20681	1.68275	0.0981316	0.995998	-4.26125	NOT	QPRT
ARL5C	-0.0849731	2.99786	-1.68241	0.0981987	0.995998	-4.26151	NOT	ARL5C
LKAAEAR1	0.178907	3.70124	1.68238	0.0982038	0.995998	-4.26153	NOT	LKAAEAR1
GPRC6A	-0.0697432	2.75448	-1.6819	0.0982972	0.995998	-4.26189	NOT	GPRC6A
RAET1E	-0.164912	2.98973	-1.68176	0.098326	0.995998	-4.26199	NOT	RAET1E
DENND2A	0.271614	4.06201	1.68174	0.098329	0.995998	-4.26201	NOT	DENND2A
CELA1	-0.138123	3.64852	-1.6817	0.0983378	0.995998	-4.26204	NOT	CELA1
TMEM213	-0.0705504	3.03778	-1.68168	0.0983408	0.995998	-4.26205	NOT	TMEM213
ADAM10	-0.420427	5.30155	-1.68123	0.0984279	0.995998	-4.26238	NOT	ADAM10
SDAD1	-0.223728	4.70484	-1.68078	0.0985172	0.995998	-4.26272	NOT	SDAD1
OXGR1	-0.092865	2.88114	-1.68051	0.09857	0.995998	-4.26292	NOT	OXGR1
RAP1GAP	0.607582	4.85906	1.68049	0.098573	0.995998	-4.26293	NOT	RAP1GAP
CAPN9	-0.179201	3.12214	-1.68025	0.0986199	0.995998	-4.26311	NOT	CAPN9
CLSPN	-0.330566	4.55254	-1.67932	0.0988018	0.995998	-4.2638	NOT	CLSPN
SRY	0.0786607	3.07464	1.67865	0.0989327	0.995998	-4.2643	NOT	SRY
ZNF780B	0.0982791	2.90366	1.6785	0.0989624	0.995998	-4.26441	NOT	ZNF780B
FAM204A	0.286618	5.03408	1.67823	0.099016	0.995998	-4.26461	NOT	FAM204A
PCDH17	-1.23891	4.64227	-1.67723	0.099213	0.995998	-4.26536	NOT	PCDH17
TCF7L1	0.217505	3.50359	1.67699	0.099259	0.995998	-4.26553	NOT	TCF7L1
FETUB	0.0749418	3.0465	1.67666	0.0993241	0.995998	-4.26578	NOT	FETUB
OSBPL6	0.521209	4.94619	1.67631	0.099394	0.995998	-4.26604	NOT	OSBPL6
GDAP1L1	0.492503	4.18699	1.67608	0.0994375	0.995998	-4.2662	NOT	GDAP1L1
IFNL1	-0.0919519	2.91492	-1.676	0.0994544	0.995998	-4.26627	NOT	IFNL1
FGFBP1	-0.405505	3.18862	-1.67552	0.0995484	0.995998	-4.26662	NOT	FGFBP1
PLEKHF2	-0.381006	5.18193	-1.67458	0.099734	0.995998	-4.26732	NOT	PLEKHF2
POLR3H	0.353204	5.39966	1.67374	0.0999001	0.995998	-4.26794	NOT	POLR3H
CDIP1	0.239071	4.29544	1.67372	0.0999043	0.995998	-4.26796	NOT	CDIP1
ZBTB1	-0.294074	5.44261	-1.67297	0.100051	0.995998	-4.26851	NOT	ZBTB1
PLA2G5	0.0735431	2.73985	1.67248	0.10015	0.995998	-4.26888	NOT	PLA2G5
SRSF12	0.79481	6.71442	1.67158	0.100327	0.995998	-4.26953	NOT	SRSF12
BRAF	0.31659	4.34133	1.67148	0.100347	0.995998	-4.26961	NOT	BRAF
MED24	0.262642	4.42577	1.67118	0.100407	0.995998	-4.26983	NOT	MED24
LY6H	0.822689	4.1323	1.67045	0.100551	0.995998	-4.27037	NOT	LY6H
MEF2D	-0.247032	4.58997	-1.67045	0.100552	0.995998	-4.27037	NOT	MEF2D
SOBP	0.676146	4.99874	1.66967	0.100708	0.995998	-4.27095	NOT	SOBP
UBE2B	-0.260533	7.02868	-1.66902	0.100837	0.995998	-4.27143	NOT	UBE2B
BACH1	-0.261809	4.67102	-1.66831	0.100978	0.995998	-4.27195	NOT	BACH1
GRIK1-AS2	-0.261809	4.67102	-1.66831	0.100978	0.995998	-4.27195	NOT	GRIK1-AS2
PRLHR	0.153271	3.10303	1.66796	0.101048	0.995998	-4.27221	NOT	PRLHR
EIF5A	0.0990509	2.97822	1.66769	0.101102	0.995998	-4.27241	NOT	EIF5A
ACKR3	-1.00466	4.53405	-1.66749	0.101141	0.995998	-4.27256	NOT	ACKR3
TIMP4	-0.198681	3.30999	-1.66722	0.101195	0.995998	-4.27275	NOT	TIMP4
IL17A	0.0869957	2.9756	1.66694	0.101251	0.995998	-4.27296	NOT	IL17A
MYBPC1	-0.424301	3.04592	-1.66661	0.101318	0.995998	-4.27321	NOT	MYBPC1
ZNF33B	-0.176568	3.84775	-1.66593	0.101453	0.995998	-4.27371	NOT	ZNF33B
PNPLA1	-0.0801723	2.99465	-1.66513	0.101613	0.995998	-4.2743	NOT	PNPLA1
SEPTIN2	-0.29841	8.53292	-1.66485	0.10167	0.995998	-4.27451	NOT	SEPTIN2
ABCD1	0.159159	3.37255	1.66469	0.101702	0.995998	-4.27462	NOT	ABCD1
AHSP	-0.138253	3.42086	-1.66453	0.101733	0.995998	-4.27474	NOT	AHSP
CNOT8	-0.26481	7.42152	-1.66337	0.101967	0.995998	-4.27559	NOT	CNOT8
TIMM21	0.315823	8.48696	1.66322	0.101996	0.995998	-4.2757	NOT	TIMM21
EEF1A1	0.389215	4.76713	1.66319	0.102002	0.995998	-4.27572	NOT	EEF1A1
CD274	0.0778395	3.15139	1.66296	0.102049	0.995998	-4.2759	NOT	CD274
DLG4	0.179817	3.50188	1.66267	0.102107	0.995998	-4.27611	NOT	DLG4
CCDC185	0.0867649	2.86057	1.66167	0.102309	0.995998	-4.27685	NOT	CCDC185
PLPP4	0.174664	3.18017	1.66146	0.102351	0.995998	-4.277	NOT	PLPP4
DNAJB1	-0.286759	6.5873	-1.66104	0.102435	0.995998	-4.27731	NOT	DNAJB1
GPAT4	0.334875	6.79052	1.66037	0.102571	0.995998	-4.2778	NOT	GPAT4
KPNA5	-0.52164	4.72537	-1.66016	0.102613	0.995998	-4.27795	NOT	KPNA5
TRMT5	-0.366049	7.88251	-1.66011	0.102623	0.995998	-4.27799	NOT	TRMT5
NRGN	0.511836	3.65345	1.65991	0.102663	0.995998	-4.27814	NOT	NRGN
FAM47A	-0.0944856	2.88261	-1.65986	0.102673	0.995998	-4.27817	NOT	FAM47A
UNK	0.17828	4.89811	1.65985	0.102676	0.995998	-4.27818	NOT	UNK
RNF215	0.214356	3.42272	1.65977	0.102692	0.995998	-4.27824	NOT	RNF215
TUFT1	-0.349224	4.55044	-1.65898	0.102851	0.995998	-4.27882	NOT	TUFT1
CUEDC2	0.351572	9.13506	1.65856	0.102937	0.995998	-4.27913	NOT	CUEDC2
JUN	-0.789758	6.95151	-1.65852	0.102946	0.995998	-4.27916	NOT	JUN
UBLCP1	-0.408251	5.80523	-1.65842	0.102965	0.995998	-4.27923	NOT	UBLCP1
ZBTB49	-0.175154	3.9179	-1.65835	0.102979	0.995998	-4.27928	NOT	ZBTB49
GPM6B	0.797559	4.49573	1.65824	0.103003	0.995998	-4.27937	NOT	GPM6B
FZD1	0.539842	4.61612	1.65803	0.103045	0.995998	-4.27952	NOT	FZD1
ACTN3	0.149466	3.28527	1.65791	0.103069	0.995998	-4.27961	NOT	ACTN3
TCF15	0.672506	4.07286	1.65736	0.103181	0.995998	-4.28001	NOT	TCF15
AKAP11	0.401273	7.5421	1.65722	0.103208	0.995998	-4.28011	NOT	AKAP11
YIPF4	-0.270584	6.21896	-1.65708	0.103237	0.995998	-4.28022	NOT	YIPF4
ZNF843	0.0871996	2.92138	1.65623	0.103409	0.995998	-4.28084	NOT	ZNF843
MGAT4B	-0.466932	6.84462	-1.65623	0.10341	0.995998	-4.28084	NOT	MGAT4B
TNKS1BP1	-0.11204	3.53126	-1.65617	0.103422	0.995998	-4.28088	NOT	TNKS1BP1
CWC22	-0.266201	7.08394	-1.65608	0.103441	0.995998	-4.28095	NOT	CWC22
PIP4P1	-0.29264	6.82401	-1.65601	0.103455	0.995998	-4.281	NOT	PIP4P1
UGT2B17	0.0628144	2.62941	1.65588	0.103482	0.995998	-4.2811	NOT	UGT2B17
CECR2	0.410804	4.02646	1.65581	0.103496	0.995998	-4.28115	NOT	CECR2
DHRS7	-0.518769	6.41585	-1.65572	0.103514	0.995998	-4.28122	NOT	DHRS7
CXCL13	-0.187119	3.15696	-1.65568	0.103522	0.995998	-4.28124	NOT	CXCL13
ARMH3	0.29175	5.92669	1.6554	0.10358	0.995998	-4.28145	NOT	ARMH3
SNRNP70	0.212726	7.54312	1.65539	0.103581	0.995998	-4.28146	NOT	SNRNP70
ARL1	-0.321781	7.2395	-1.65535	0.10359	0.995998	-4.28149	NOT	ARL1
TBKBP1	0.108755	3.38128	1.65495	0.10367	0.995998	-4.28178	NOT	TBKBP1
FRAS1	-0.970296	6.19232	-1.6546	0.103742	0.995998	-4.28204	NOT	FRAS1
TAX1BP3	-0.485189	9.31402	-1.65435	0.103794	0.995998	-4.28222	NOT	TAX1BP3
ATP6V1G3	0.117892	2.8893	1.65379	0.103907	0.995998	-4.28263	NOT	ATP6V1G3
SRPK1	0.286849	7.22139	1.65356	0.103955	0.995998	-4.2828	NOT	SRPK1
TAF1	0.237895	5.1423	1.65354	0.103958	0.995998	-4.28281	NOT	TAF1
KDSR	0.379855	6.68833	1.65332	0.104003	0.995998	-4.28297	NOT	KDSR
SARS	0.386195	10.3653	1.65245	0.104182	0.995998	-4.28361	NOT	SARS
USO1	-0.376938	7.62551	-1.65231	0.104208	0.995998	-4.28371	NOT	USO1
ZNF672	-0.200114	3.92675	-1.65202	0.10427	0.995998	-4.28393	NOT	ZNF672
RNF186	-0.629677	3.68956	-1.65183	0.104307	0.995998	-4.28406	NOT	RNF186
ZNF484	-0.253861	4.06943	-1.65144	0.104388	0.995998	-4.28435	NOT	ZNF484
MOCS2	-0.404655	5.77453	-1.6514	0.104396	0.995998	-4.28438	NOT	MOCS2
KRTAP13-2	0.073748	2.6326	1.65076	0.104526	0.995998	-4.28485	NOT	KRTAP13-2
WASF2	0.176923	3.94649	1.65058	0.104565	0.995998	-4.28498	NOT	WASF2
ZRANB2	0.227146	8.93084	1.65037	0.104606	0.995998	-4.28513	NOT	ZRANB2
CYP2W1	-0.11125	2.90901	-1.65036	0.10461	0.995998	-4.28514	NOT	CYP2W1
CTDSP1	-0.209722	4.35077	-1.65005	0.104673	0.995998	-4.28537	NOT	CTDSP1
INPP4B	-0.282395	3.14011	-1.64961	0.104764	0.995998	-4.28569	NOT	INPP4B
S100A10	-1.37568	5.99317	-1.6479	0.105115	0.995998	-4.28694	NOT	S100A10
ZNF524	-0.197634	3.9351	-1.64764	0.105169	0.995998	-4.28713	NOT	ZNF524
FBXO32	-0.974284	5.03739	-1.64731	0.105236	0.995998	-4.28737	NOT	FBXO32
LEPROTL1	0.401922	7.45411	1.64703	0.105293	0.995998	-4.28757	NOT	LEPROTL1
PEX11G	-0.159514	3.58125	-1.6462	0.105466	0.995998	-4.28818	NOT	PEX11G
C5orf49	-0.142365	3.29457	-1.64586	0.105536	0.995998	-4.28843	NOT	C5orf49
LPAR1	-0.377995	3.53139	-1.64561	0.105587	0.995998	-4.28861	NOT	LPAR1
RBM10	0.239433	9.01969	1.64561	0.105588	0.995998	-4.28861	NOT	RBM10
PTTG3P	-0.199842	3.98834	-1.64523	0.105666	0.995998	-4.28888	NOT	PTTG3P
PHF21A	0.209109	4.64111	1.64481	0.105753	0.995998	-4.28919	NOT	PHF21A
EEF1AKMT1	0.48257	4.95405	1.64451	0.105816	0.995998	-4.28941	NOT	EEF1AKMT1
ZDHHC16	0.31025	6.33208	1.6445	0.105818	0.995998	-4.28942	NOT	ZDHHC16
PAWR	-0.497663	6.65381	-1.64413	0.105894	0.995998	-4.28969	NOT	PAWR
STRA6	0.408451	3.7008	1.64409	0.105902	0.995998	-4.28972	NOT	STRA6
LIPT2	-0.445159	4.19388	-1.64333	0.10606	0.995998	-4.29027	NOT	LIPT2
NFE2L2	-0.341583	9.7806	-1.64296	0.106137	0.995998	-4.29054	NOT	NFE2L2
OTUD6A	0.0921824	3.01158	1.64295	0.106139	0.995998	-4.29055	NOT	OTUD6A
TWNK	0.424609	6.04822	1.64264	0.106202	0.995998	-4.29077	NOT	TWNK
KBTBD11	0.397492	5.0656	1.64252	0.106228	0.995998	-4.29086	NOT	KBTBD11
STX18	-0.393911	6.09524	-1.64229	0.106276	0.995998	-4.29103	NOT	STX18
TOMM34	0.369688	6.50669	1.64214	0.106307	0.995998	-4.29114	NOT	TOMM34
USP48	0.293406	7.81455	1.64195	0.106347	0.995998	-4.29128	NOT	USP48
DBH	-0.397557	3.60077	-1.64139	0.106464	0.995998	-4.29169	NOT	DBH
OPA3	-0.120682	3.92723	-1.64104	0.106535	0.995998	-4.29194	NOT	OPA3
ATG7	-0.258001	3.94163	-1.64007	0.106738	0.995998	-4.29265	NOT	ATG7
OR4P4	-0.113452	3.10397	-1.63998	0.106757	0.995998	-4.29271	NOT	OR4P4
IFIT5	0.552179	4.91726	1.63981	0.106793	0.995998	-4.29283	NOT	IFIT5
TNFRSF8	0.0908231	3.15705	1.63972	0.106811	0.995998	-4.2929	NOT	TNFRSF8
STEAP2	-0.461993	3.43835	-1.63938	0.106883	0.995998	-4.29315	NOT	STEAP2
SLC38A6	-0.479045	5.18728	-1.63886	0.106992	0.995998	-4.29353	NOT	SLC38A6
SOCS4	-0.178191	3.77885	-1.63843	0.107082	0.995998	-4.29384	NOT	SOCS4
NADSYN1	-0.463337	5.46714	-1.63792	0.107187	0.995998	-4.2942	NOT	NADSYN1
PDCL	-0.285644	6.43325	-1.6377	0.107234	0.995998	-4.29437	NOT	PDCL
ZNF766	-0.307334	5.70773	-1.63751	0.107273	0.995998	-4.2945	NOT	ZNF766
MS4A13	-0.079741	2.89329	-1.63695	0.10739	0.995998	-4.29491	NOT	MS4A13
ADHFE1	-0.0990222	2.99316	-1.63658	0.107468	0.995998	-4.29518	NOT	ADHFE1
LRRC19	-0.0759568	2.9366	-1.63613	0.107563	0.995998	-4.29551	NOT	LRRC19
ELOA	0.28856	6.79509	1.63567	0.10766	0.995998	-4.29584	NOT	ELOA
CTIF	0.187718	3.82852	1.63562	0.107671	0.995998	-4.29588	NOT	CTIF
DUS4L	-0.296717	5.73767	-1.63504	0.107791	0.995998	-4.2963	NOT	DUS4L
SLC7A13	0.0826516	2.9128	1.63501	0.107797	0.995998	-4.29632	NOT	SLC7A13
GALK1	0.547626	5.4421	1.63499	0.107803	0.995998	-4.29634	NOT	GALK1
2019-03-02	-0.409211	4.20252	-1.63498	0.107803	0.995998	-4.29634	NOT	2019-03-02
CDH26	-0.145092	2.9588	-1.63497	0.107807	0.995998	-4.29635	NOT	CDH26
MALT1	0.42801	5.48179	1.63491	0.107818	0.995998	-4.29639	NOT	MALT1
UTP14A	0.204745	3.39206	1.63488	0.107825	0.995998	-4.29641	NOT	UTP14A
TNFRSF10A	-0.49357	4.17184	-1.63479	0.107844	0.995998	-4.29648	NOT	TNFRSF10A
NAGA	0.345628	5.54717	1.63425	0.107959	0.995998	-4.29687	NOT	NAGA
KLRF1	-0.107544	2.94681	-1.63395	0.108022	0.995998	-4.29709	NOT	KLRF1
LINC01895	-0.335125	3.61287	-1.63355	0.108105	0.995998	-4.29738	NOT	LINC01895
UBE2L3	0.300004	6.54851	1.63331	0.108155	0.995998	-4.29755	NOT	UBE2L3
XPR1	0.335396	4.83641	1.63304	0.108214	0.995998	-4.29775	NOT	XPR1
FZR1	-0.155901	3.85207	-1.633	0.108221	0.995998	-4.29777	NOT	FZR1
LPAR3	0.305551	3.50059	1.63228	0.108373	0.995998	-4.2983	NOT	LPAR3
CAB39	-0.265175	5.82097	-1.63214	0.108403	0.995998	-4.2984	NOT	CAB39
IL21R	0.159669	3.27393	1.63195	0.108443	0.995998	-4.29854	NOT	IL21R
NPAS4	0.0945574	3.01712	1.6319	0.108453	0.995998	-4.29857	NOT	NPAS4
ATF2	-0.235543	4.87089	-1.63172	0.108492	0.995998	-4.29871	NOT	ATF2
CASP8	-0.253766	3.67009	-1.63138	0.108564	0.995998	-4.29895	NOT	CASP8
MAML2	0.354733	4.47759	1.63057	0.108735	0.995998	-4.29954	NOT	MAML2
RELCH	0.398876	5.01101	1.62997	0.108861	0.995998	-4.29997	NOT	RELCH
CPNE5	0.251532	3.50567	1.6294	0.108983	0.995998	-4.30038	NOT	CPNE5
RGS4	1.09449	4.18134	1.62914	0.109039	0.995998	-4.30057	NOT	RGS4
STS	-0.292237	3.69448	-1.62899	0.10907	0.995998	-4.30068	NOT	STS
SP100	-0.373547	3.68132	-1.62887	0.109095	0.995998	-4.30076	NOT	SP100
IL37	-0.0928388	3.14049	-1.62864	0.109143	0.995998	-4.30093	NOT	IL37
TSR2	0.304965	7.54283	1.62864	0.109145	0.995998	-4.30094	NOT	TSR2
THAP3	-0.191494	4.15322	-1.62799	0.109283	0.995998	-4.3014	NOT	THAP3
GLRA1	0.115351	3.11026	1.62758	0.10937	0.995998	-4.3017	NOT	GLRA1
ZSCAN18	0.353249	4.93363	1.6272	0.109451	0.995998	-4.30197	NOT	ZSCAN18
DNHD1	0.145816	3.45355	1.62676	0.109545	0.995998	-4.30229	NOT	DNHD1
TGIF1	-0.945233	6.33923	-1.6265	0.109599	0.995998	-4.30248	NOT	TGIF1
GRK5	0.467784	3.7484	1.62589	0.109729	0.995998	-4.30292	NOT	GRK5
PLEK2	-1.06816	5.394	-1.62586	0.109735	0.995998	-4.30294	NOT	PLEK2
RNASE11	0.0611659	2.88292	1.62577	0.109755	0.995998	-4.303	NOT	RNASE11
CDC25A	0.406345	5.59701	1.62566	0.109779	0.995998	-4.30309	NOT	CDC25A
TNIP2	-0.328518	4.49674	-1.6249	0.109942	0.995998	-4.30364	NOT	TNIP2
FAM120AOS	-0.201595	4.50511	-1.62485	0.109952	0.995998	-4.30367	NOT	FAM120AOS
MAGED1	0.384012	10.3586	1.62456	0.110014	0.995998	-4.30388	NOT	MAGED1
OSBPL2	-0.343654	6.08	-1.62446	0.110036	0.995998	-4.30395	NOT	OSBPL2
UROS	0.432431	6.18939	1.62395	0.110144	0.995998	-4.30432	NOT	UROS
TTC21B	-0.379801	6.13734	-1.62395	0.110144	0.995998	-4.30432	NOT	TTC21B
ICAM5	0.342813	3.87891	1.62395	0.110145	0.995998	-4.30432	NOT	ICAM5
GDAP2	-0.362211	5.83811	-1.62378	0.110182	0.995998	-4.30445	NOT	GDAP2
CX3CL1	0.129704	3.4319	1.62345	0.110252	0.995998	-4.30468	NOT	CX3CL1
GZMK	-0.0870942	2.91861	-1.62194	0.110575	0.995998	-4.30577	NOT	GZMK
ZNF212	0.250587	6.58921	1.62019	0.110952	0.995998	-4.30703	NOT	ZNF212
SLC9A5	0.229271	3.49613	1.62009	0.110972	0.995998	-4.3071	NOT	SLC9A5
ABO	0.112099	3.17255	1.62008	0.110975	0.995998	-4.30711	NOT	ABO
USP4	0.34833	7.9514	1.61991	0.111012	0.995998	-4.30723	NOT	USP4
LOC107986084	0.34833	7.9514	1.61991	0.111012	0.995998	-4.30723	NOT	LOC107986084
SLC16A6	0.166586	3.3281	1.61984	0.111027	0.995998	-4.30728	NOT	SLC16A6
MANF	0.301088	9.68346	1.61979	0.111037	0.995998	-4.30732	NOT	MANF
CYP4B1	0.158219	2.95585	1.6196	0.111078	0.995998	-4.30745	NOT	CYP4B1
ZNF436-AS1	0.399507	4.77811	1.61948	0.111104	0.995998	-4.30754	NOT	ZNF436-AS1
OR10W1	0.0791857	2.9788	1.61948	0.111104	0.995998	-4.30754	NOT	OR10W1
CDCA8	-0.590217	6.84891	-1.61947	0.111107	0.995998	-4.30755	NOT	CDCA8
CHMP4B	-0.30278	9.63644	-1.61939	0.111123	0.995998	-4.3076	NOT	CHMP4B
SPATA46	0.103176	3.03071	1.61938	0.111126	0.995998	-4.30761	NOT	SPATA46
SMCO2	-0.223085	3.37819	-1.61916	0.111173	0.995998	-4.30777	NOT	SMCO2
POLI	0.420979	5.18029	1.61914	0.111178	0.995998	-4.30778	NOT	POLI
ZBED9	0.593787	4.78497	1.61905	0.111197	0.995998	-4.30785	NOT	ZBED9
TSPYL1	-0.279722	4.45682	-1.61825	0.111369	0.995998	-4.30842	NOT	TSPYL1
METTL5	-0.260132	10.5977	-1.6177	0.111488	0.995998	-4.30882	NOT	METTL5
ZNF32	-0.54292	7.52627	-1.61736	0.111562	0.995998	-4.30906	NOT	ZNF32
IGDCC4	0.616088	4.29341	1.61728	0.11158	0.995998	-4.30912	NOT	IGDCC4
BMP2K	-0.253185	5.00704	-1.61698	0.111644	0.995998	-4.30934	NOT	BMP2K
SERPINF1	1.02011	4.36497	1.61672	0.1117	0.995998	-4.30952	NOT	SERPINF1
SELENOT	-0.332457	7.89754	-1.61644	0.111762	0.995998	-4.30973	NOT	SELENOT
PRKRA	-0.262756	8.4973	-1.61612	0.11183	0.995998	-4.30995	NOT	PRKRA
IL34	0.0961618	3.18483	1.61606	0.111843	0.995998	-4.31	NOT	IL34
SNTG2	-0.207549	3.34204	-1.61488	0.1121	0.995998	-4.31085	NOT	SNTG2
REEP3	-0.260923	3.66108	-1.61438	0.112209	0.995998	-4.31121	NOT	REEP3
TCFL5	0.348022	5.43625	1.61428	0.11223	0.995998	-4.31128	NOT	TCFL5
MFSD14B	-0.301809	6.18334	-1.61363	0.11237	0.995998	-4.31174	NOT	MFSD14B
SDC4	-0.934529	5.93426	-1.61363	0.11237	0.995998	-4.31174	NOT	SDC4
SLITRK4	0.865768	4.53708	1.61319	0.112466	0.995998	-4.31206	NOT	SLITRK4
DMRT1	-0.0735406	3.10957	-1.61317	0.112471	0.995998	-4.31207	NOT	DMRT1
MRAP	0.07661	3.15125	1.61291	0.112528	0.995998	-4.31226	NOT	MRAP
CFAP69	-0.239546	3.60191	-1.61208	0.112709	0.995998	-4.31286	NOT	CFAP69
CBY1	0.333661	7.65525	1.61176	0.112778	0.995998	-4.31308	NOT	CBY1
USP53	-0.386927	4.9734	-1.61165	0.112803	0.995998	-4.31316	NOT	USP53
FOXQ1	-0.438461	3.52704	-1.61147	0.112841	0.995998	-4.31329	NOT	FOXQ1
CRCP	0.362452	6.03784	1.61142	0.112852	0.995998	-4.31332	NOT	CRCP
GSR	0.412898	7.07967	1.61137	0.112863	0.995998	-4.31336	NOT	GSR
WDR13	0.346573	7.13332	1.61132	0.112875	0.995998	-4.3134	NOT	WDR13
PASK	-0.359573	5.02095	-1.6113	0.11288	0.995998	-4.31342	NOT	PASK
LAYN	0.745181	4.72646	1.61093	0.112959	0.995998	-4.31367	NOT	LAYN
SAXO2	0.0873643	2.85461	1.61087	0.112974	0.995998	-4.31372	NOT	SAXO2
CEP55	-0.420579	7.16007	-1.61084	0.11298	0.995998	-4.31374	NOT	CEP55
GREB1	0.146898	3.00927	1.61066	0.113019	0.995998	-4.31387	NOT	GREB1
LBR	0.303948	6.9217	1.61014	0.113133	0.995998	-4.31425	NOT	LBR
C4orf50	0.0583509	2.91893	1.60938	0.113298	0.995998	-4.31479	NOT	C4orf50
ADRB2	-0.462808	3.80102	-1.60938	0.113299	0.995998	-4.31479	NOT	ADRB2
ZDHHC14	-0.507168	5.47114	-1.60934	0.113307	0.995998	-4.31482	NOT	ZDHHC14
ABHD12B	0.062842	2.89794	1.60932	0.113311	0.995998	-4.31483	NOT	ABHD12B
NXF5	0.0827396	2.83059	1.60861	0.113466	0.995998	-4.31534	NOT	NXF5
RAD51AP2	-0.110725	2.96985	-1.6084	0.113512	0.995998	-4.31549	NOT	RAD51AP2
AZIN1	-0.316208	9.57919	-1.60825	0.113546	0.995998	-4.3156	NOT	AZIN1
NPC2	-0.471726	7.1825	-1.60783	0.113638	0.995998	-4.3159	NOT	NPC2
CTXN1	0.156214	3.43897	1.6077	0.113667	0.995998	-4.31599	NOT	CTXN1
GLRX	-0.710142	4.5526	-1.60727	0.113762	0.995998	-4.3163	NOT	GLRX
PSPC1	0.216312	4.20193	1.60724	0.113769	0.995998	-4.31632	NOT	PSPC1
COL16A1	0.737434	4.85153	1.60707	0.113806	0.995998	-4.31644	NOT	COL16A1
PROSER1	0.440092	7.57726	1.60664	0.113899	0.995998	-4.31674	NOT	PROSER1
ZDHHC5	-0.246263	6.46133	-1.60653	0.113925	0.995998	-4.31683	NOT	ZDHHC5
STK11	-0.264015	4.70556	-1.60621	0.113995	0.995998	-4.31706	NOT	STK11
ZNF311	0.384075	3.20837	1.60527	0.114202	0.995998	-4.31773	NOT	ZNF311
MIPEP	0.555113	6.73948	1.60481	0.114303	0.995998	-4.31806	NOT	MIPEP
TCHHL1	-0.0973	2.85245	-1.6046	0.11435	0.995998	-4.31821	NOT	TCHHL1
COQ10A	0.42969	7.14213	1.60339	0.114617	0.995998	-4.31907	NOT	COQ10A
ZNF367	-0.272842	5.16527	-1.60279	0.11475	0.995998	-4.3195	NOT	ZNF367
LRP12	-0.46425	6.22389	-1.60222	0.114875	0.995998	-4.3199	NOT	LRP12
TMEM40	-0.200294	3.28098	-1.60219	0.114882	0.995998	-4.31992	NOT	TMEM40
ATP11C	1.05778	8.10226	1.60207	0.114909	0.995998	-4.32001	NOT	ATP11C
CTTNBP2	-0.583138	3.39055	-1.6014	0.115057	0.995998	-4.32049	NOT	CTTNBP2
LINC00847	-0.499876	6.05992	-1.60132	0.115075	0.995998	-4.32055	NOT	LINC00847
CLUH	0.206675	4.13408	1.60119	0.115104	0.995998	-4.32064	NOT	CLUH
SPATA2L	0.110361	3.55987	1.60073	0.115205	0.995998	-4.32096	NOT	SPATA2L
NICN1	0.341983	5.45864	1.60061	0.115232	0.995998	-4.32105	NOT	NICN1
GPATCH1	-0.313999	6.91556	-1.60046	0.115266	0.995998	-4.32116	NOT	GPATCH1
HOXD10	0.664906	4.92803	1.60031	0.115299	0.995998	-4.32126	NOT	HOXD10
SPICE1	-0.113329	3.30822	-1.59965	0.115446	0.995998	-4.32173	NOT	SPICE1
RRAGC	-0.480435	7.91983	-1.59916	0.115555	0.995998	-4.32208	NOT	RRAGC
KCTD6	0.41486	8.42369	1.59864	0.11567	0.995998	-4.32245	NOT	KCTD6
TUBB4B	-0.296329	11.6459	-1.598	0.115813	0.995998	-4.32291	NOT	TUBB4B
PTN	1.47808	5.75749	1.5977	0.11588	0.995998	-4.32312	NOT	PTN
UBE2N	0.279322	8.97787	1.59762	0.115897	0.995998	-4.32317	NOT	UBE2N
SLC36A1	-0.0877901	3.45251	-1.59713	0.116007	0.995998	-4.32353	NOT	SLC36A1
OR2D3	0.0871224	3.02267	1.59671	0.116102	0.995998	-4.32383	NOT	OR2D3
CNEP1R1	-0.271795	4.83865	-1.59659	0.116128	0.995998	-4.32391	NOT	CNEP1R1
ZNF445	0.122721	3.58809	1.59635	0.116181	0.995998	-4.32408	NOT	ZNF445
KDELR1	0.383908	6.99876	1.596	0.116258	0.995998	-4.32433	NOT	KDELR1
TLN1	0.23112	3.89609	1.59562	0.116345	0.995998	-4.3246	NOT	TLN1
POLD1	0.349574	6.88902	1.59555	0.116359	0.995998	-4.32465	NOT	POLD1
ATG4B	-0.232031	6.21635	-1.5952	0.116439	0.995998	-4.3249	NOT	ATG4B
TCTA	0.287873	4.98843	1.59507	0.116467	0.995998	-4.32499	NOT	TCTA
FRRS1	-0.13222	2.90566	-1.59498	0.116488	0.995998	-4.32506	NOT	FRRS1
RGSL1	-0.0604827	3.09458	-1.59488	0.11651	0.995998	-4.32513	NOT	RGSL1
EIF1AY	1.11298	4.54257	1.5944	0.116617	0.995998	-4.32546	NOT	EIF1AY
RAB27B	-0.256003	3.14568	-1.59424	0.116654	0.995998	-4.32558	NOT	RAB27B
RAB11FIP2	0.321616	4.51246	1.59415	0.116673	0.995998	-4.32564	NOT	RAB11FIP2
OR10P1	0.0959282	3.27469	1.59374	0.116765	0.995998	-4.32593	NOT	OR10P1
BMPR1A	0.348312	4.24923	1.59369	0.116778	0.995998	-4.32597	NOT	BMPR1A
C10orf67	-0.177313	3.13198	-1.59358	0.116802	0.995998	-4.32605	NOT	C10orf67
TNFSF18	0.0718912	2.94068	1.59333	0.116857	0.995998	-4.32622	NOT	TNFSF18
PER2	0.173912	3.42635	1.59312	0.116904	0.995998	-4.32637	NOT	PER2
ZNF319	-0.115454	3.64145	-1.59266	0.117007	0.995998	-4.3267	NOT	ZNF319
FAM111B	-0.672826	5.98885	-1.59258	0.117027	0.995998	-4.32676	NOT	FAM111B
ZNF233	-0.183885	3.38336	-1.59255	0.117034	0.995998	-4.32678	NOT	ZNF233
ZNF395	0.41294	7.12649	1.59241	0.117064	0.995998	-4.32688	NOT	ZNF395
DBNDD1	0.176601	3.94375	1.59188	0.117184	0.995998	-4.32726	NOT	DBNDD1
CDH1	-0.792957	4.72239	-1.59174	0.117215	0.995998	-4.32735	NOT	CDH1
WNT10B	0.383726	4.0021	1.59167	0.117231	0.995998	-4.3274	NOT	WNT10B
WDR24	-0.250473	4.03302	-1.59154	0.11726	0.995998	-4.32749	NOT	WDR24
CEP72	-0.368481	4.51054	-1.59137	0.117297	0.995998	-4.32761	NOT	CEP72
ZSCAN30	0.329196	4.19232	1.59081	0.117424	0.995998	-4.32801	NOT	ZSCAN30
GJC2	0.1431	3.83329	1.59063	0.117464	0.995998	-4.32814	NOT	GJC2
NELFCD	0.292786	9.02489	1.59054	0.117484	0.995998	-4.3282	NOT	NELFCD
HFM1	-0.221187	3.34531	-1.59023	0.117554	0.995998	-4.32842	NOT	HFM1
FAM9B	-0.221659	2.97574	-1.5901	0.117585	0.995998	-4.32852	NOT	FAM9B
SWSAP1	-0.233686	4.28562	-1.59	0.117608	0.995998	-4.32859	NOT	SWSAP1
NCKAP1	-0.283395	9.75856	-1.58983	0.117645	0.995998	-4.3287	NOT	NCKAP1
PPIC	-0.87678	5.38605	-1.58981	0.117649	0.995998	-4.32872	NOT	PPIC
FKBP10	0.945159	5.29063	1.58951	0.117719	0.995998	-4.32893	NOT	FKBP10
FAS	0.476622	3.64725	1.5894	0.117743	0.995998	-4.32901	NOT	FAS
NT5C3B	0.463785	6.51436	1.58931	0.117763	0.995998	-4.32907	NOT	NT5C3B
TMEM185B	-0.37795	6.80652	-1.5892	0.117788	0.995998	-4.32915	NOT	TMEM185B
DDAH1	-0.182496	4.17473	-1.58871	0.117897	0.995998	-4.3295	NOT	DDAH1
FKBP8	0.144147	3.47177	1.58852	0.117942	0.995998	-4.32963	NOT	FKBP8
ERRFI1	-0.74976	7.83964	-1.58785	0.118094	0.995998	-4.33011	NOT	ERRFI1
FAM124A	0.159213	3.29124	1.58704	0.118277	0.995998	-4.33068	NOT	FAM124A
KRT6B	0.0799407	3.12409	1.58646	0.118408	0.995998	-4.33109	NOT	KRT6B
SLC19A1	0.219877	3.66517	1.58641	0.118421	0.995998	-4.33113	NOT	SLC19A1
ZNF598	0.391353	6.66195	1.58634	0.118435	0.995998	-4.33117	NOT	ZNF598
KLHL13	0.821746	4.99375	1.58615	0.118479	0.995998	-4.33131	NOT	KLHL13
IGSF1	0.327457	3.30938	1.58568	0.118586	0.995998	-4.33164	NOT	IGSF1
SULT4A1	0.614842	4.85382	1.58501	0.118738	0.995998	-4.33212	NOT	SULT4A1
NDUFS2	0.218229	6.6246	1.58395	0.118978	0.995998	-4.33286	NOT	NDUFS2
EI24	0.271021	8.74955	1.58392	0.118986	0.995998	-4.33288	NOT	EI24
TM6SF1	0.665558	4.07041	1.58368	0.11904	0.995998	-4.33305	NOT	TM6SF1
LZTFL1	-0.403671	4.80838	-1.58356	0.119067	0.995998	-4.33314	NOT	LZTFL1
C6	0.166276	2.88601	1.58355	0.11907	0.995998	-4.33315	NOT	C6
RND2	0.253011	3.69697	1.58352	0.119078	0.995998	-4.33317	NOT	RND2
VASH2	0.40965	3.74683	1.58323	0.119143	0.995998	-4.33337	NOT	VASH2
MINK1	0.143045	4.11326	1.58319	0.119152	0.995998	-4.3334	NOT	MINK1
TMEM171	-0.528948	3.49396	-1.58317	0.119158	0.995998	-4.33342	NOT	TMEM171
MLLT10	0.257354	4.5883	1.58309	0.119175	0.995998	-4.33347	NOT	MLLT10
MRPL39	0.279117	7.92068	1.58299	0.119198	0.995998	-4.33354	NOT	MRPL39
BAHD1	0.299853	6.27976	1.58285	0.119231	0.995998	-4.33364	NOT	BAHD1
BAAT	-0.181651	3.13362	-1.58278	0.119246	0.995998	-4.33369	NOT	BAAT
FAM184B	0.423457	3.43429	1.5825	0.11931	0.995998	-4.33389	NOT	FAM184B
SNX11	-0.221728	4.9167	-1.58224	0.119369	0.995998	-4.33407	NOT	SNX11
PCYT1B	-0.188983	3.33836	-1.58214	0.119392	0.995998	-4.33414	NOT	PCYT1B
IFT88	0.278949	3.83088	1.58211	0.119399	0.995998	-4.33416	NOT	IFT88
C6orf201	0.0559508	2.88529	1.58191	0.119445	0.995998	-4.3343	NOT	C6orf201
RCOR2	0.671143	4.76414	1.58183	0.119462	0.995998	-4.33436	NOT	RCOR2
USP26	-0.0935251	3.28526	-1.58166	0.119502	0.995998	-4.33448	NOT	USP26
TP53INP2	-0.28448	4.92982	-1.58142	0.119555	0.995998	-4.33464	NOT	TP53INP2
SLC4A9	-0.0827921	3.05039	-1.58134	0.119575	0.995998	-4.3347	NOT	SLC4A9
LCN8	-0.133534	3.60685	-1.58093	0.119668	0.995998	-4.33499	NOT	LCN8
RPS6KA4	-0.0680333	3.22299	-1.58083	0.11969	0.995998	-4.33506	NOT	RPS6KA4
MPI	0.287197	4.36283	1.5806	0.119744	0.995998	-4.33523	NOT	MPI
EFNB3	0.359442	4.09082	1.58023	0.119828	0.995998	-4.33548	NOT	EFNB3
ARL9	-0.501724	3.9554	-1.57999	0.119884	0.995998	-4.33566	NOT	ARL9
SPOCK3	0.300277	3.16795	1.57974	0.11994	0.995998	-4.33583	NOT	SPOCK3
RAB7A	0.285445	8.22541	1.57916	0.120074	0.995998	-4.33624	NOT	RAB7A
SLC22A13	0.118646	3.39362	1.57749	0.120459	0.995998	-4.33742	NOT	SLC22A13
ZNF480	-0.26365	3.90005	-1.57743	0.120472	0.995998	-4.33746	NOT	ZNF480
ZNF81	0.0877363	3.25017	1.57722	0.120521	0.995998	-4.33761	NOT	ZNF81
MVP	-0.447294	4.89768	-1.57705	0.120558	0.995998	-4.33772	NOT	MVP
TJP3	-0.158169	3.04911	-1.57699	0.120574	0.995998	-4.33777	NOT	TJP3
ESR2	0.0566923	3.00307	1.57673	0.120633	0.995998	-4.33795	NOT	ESR2
LINC01121	0.0933607	3.01699	1.57636	0.120719	0.995998	-4.33821	NOT	LINC01121
OR56B4	0.0742639	3.12861	1.57621	0.120752	0.995998	-4.33831	NOT	OR56B4
CLEC2D	-0.150219	3.02606	-1.57606	0.120787	0.995998	-4.33842	NOT	CLEC2D
ZFY	0.168732	2.90686	1.576	0.1208	0.995998	-4.33846	NOT	ZFY
CEP126	-0.65998	4.78404	-1.57524	0.120976	0.995998	-4.339	NOT	CEP126
LZIC	-0.372586	7.16882	-1.57473	0.121093	0.995998	-4.33935	NOT	LZIC
THUMPD1	-0.264736	8.41675	-1.57455	0.121137	0.995998	-4.33948	NOT	THUMPD1
ZIC4	-0.0530567	2.96461	-1.57374	0.121323	0.995998	-4.34005	NOT	ZIC4
CAMTA2	0.134928	4.22982	1.57342	0.121397	0.995998	-4.34028	NOT	CAMTA2
NLRP3	-0.164113	3.23364	-1.57333	0.121418	0.995998	-4.34034	NOT	NLRP3
ZNF165	-0.534156	5.1012	-1.57323	0.121441	0.995998	-4.34041	NOT	ZNF165
RHOBTB2	0.185558	3.97708	1.57315	0.121461	0.995998	-4.34047	NOT	RHOBTB2
INSM2	0.320084	3.46298	1.57306	0.121481	0.995998	-4.34053	NOT	INSM2
DEFB108B	0.117569	3.73257	1.57282	0.121536	0.995998	-4.3407	NOT	DEFB108B
KIRREL2	0.189611	3.28784	1.57214	0.121693	0.995998	-4.34117	NOT	KIRREL2
GPR3	0.0821142	3.5348	1.57207	0.121709	0.995998	-4.34122	NOT	GPR3
SLC25A45	-0.122135	3.53157	-1.57205	0.121714	0.995998	-4.34124	NOT	SLC25A45
NUPR2	-0.654336	3.52966	-1.57181	0.12177	0.995998	-4.3414	NOT	NUPR2
CAPN10	-0.156968	4.18561	-1.57177	0.121779	0.995998	-4.34143	NOT	CAPN10
NUDCD2	-0.292345	8.84112	-1.57169	0.121799	0.995998	-4.34149	NOT	NUDCD2
C18orf21	0.368538	7.51175	1.57118	0.121917	0.995998	-4.34185	NOT	C18orf21
TRPV6	-0.138928	3.08297	-1.57069	0.122031	0.995998	-4.34219	NOT	TRPV6
ZNF665	0.0838137	3.10068	1.5701	0.122169	0.995998	-4.34261	NOT	ZNF665
KIF20A	-0.474615	8.60297	-1.56966	0.12227	0.995998	-4.34291	NOT	KIF20A
ATOX1	-0.364814	8.89365	-1.56885	0.122459	0.995998	-4.34348	NOT	ATOX1
KLKB1	-0.127016	3.37461	-1.5688	0.12247	0.995998	-4.34351	NOT	KLKB1
OR4N5	-0.080141	2.93348	-1.56858	0.122521	0.995998	-4.34367	NOT	OR4N5
MRPL57	0.344005	5.46041	1.56833	0.122579	0.995998	-4.34384	NOT	MRPL57
MSLN	0.109462	3.60445	1.5682	0.122611	0.995998	-4.34394	NOT	MSLN
FAM57B	0.466865	4.94188	1.5677	0.122728	0.995998	-4.34429	NOT	FAM57B
COQ10B	-0.426615	6.12894	-1.56755	0.122763	0.995998	-4.34439	NOT	COQ10B
TUBA1C	-0.250086	10.2743	-1.56708	0.122873	0.995998	-4.34472	NOT	TUBA1C
CRISP1	-0.0623627	2.84607	-1.56705	0.122878	0.995998	-4.34473	NOT	CRISP1
MLANA	-0.0684651	3.24818	-1.56688	0.122918	0.995998	-4.34485	NOT	MLANA
NPTX1	-0.719798	4.74799	-1.56677	0.122944	0.995998	-4.34493	NOT	NPTX1
PPP2CB	0.300164	9.97858	1.56668	0.122965	0.995998	-4.345	NOT	PPP2CB
ZAR1L	0.0937709	3.20235	1.56537	0.123273	0.995998	-4.34591	NOT	ZAR1L
OR2M3	0.0865263	3.28796	1.56536	0.123274	0.995998	-4.34592	NOT	OR2M3
ARHGEF37	-0.112936	3.61739	-1.56497	0.123366	0.995998	-4.34619	NOT	ARHGEF37
EVI2B	-0.147177	3.51452	-1.56479	0.123409	0.995998	-4.34632	NOT	EVI2B
ICK	-0.131155	3.4856	-1.56441	0.123498	0.995998	-4.34659	NOT	ICK
MSL3P1	-0.974749	5.93037	-1.56433	0.123517	0.995998	-4.34664	NOT	MSL3P1
ACCSL	-0.0757451	3.02429	-1.56424	0.123538	0.995998	-4.3467	NOT	ACCSL
GRSF1	-0.254244	7.71007	-1.56412	0.123566	0.995998	-4.34679	NOT	GRSF1
CCNT2	-0.203822	3.94383	-1.56407	0.123577	0.995998	-4.34682	NOT	CCNT2
C6orf15	0.0712419	3.00848	1.56378	0.123645	0.995998	-4.34702	NOT	C6orf15
PROSER3	-0.0573008	3.01131	-1.56349	0.123714	0.995998	-4.34723	NOT	PROSER3
GSTA4	0.593581	8.31367	1.56319	0.123784	0.995998	-4.34744	NOT	GSTA4
LMO3	-1.05058	4.7045	-1.56318	0.123787	0.995998	-4.34744	NOT	LMO3
HSPA12A	0.315684	3.79907	1.56295	0.123842	0.995998	-4.3476	NOT	HSPA12A
RAB14	-0.222696	6.9708	-1.56281	0.123873	0.995998	-4.3477	NOT	RAB14
LHX9	0.19169	2.97118	1.5628	0.123876	0.995998	-4.34771	NOT	LHX9
TDRG1	-0.0983645	3.25495	-1.56163	0.124152	0.995998	-4.34853	NOT	TDRG1
CD109	-0.324366	3.46294	-1.56162	0.124153	0.995998	-4.34853	NOT	CD109
CTNNBIP1	-0.303945	4.95379	-1.56138	0.124211	0.995998	-4.3487	NOT	CTNNBIP1
TIGD1	-0.413193	6.63673	-1.56124	0.124244	0.995998	-4.3488	NOT	TIGD1
RPL37	0.418318	7.92164	1.56118	0.124257	0.995998	-4.34884	NOT	RPL37
TTLL12	0.331419	4.86581	1.56079	0.124348	0.995998	-4.34911	NOT	TTLL12
PITX2	0.947723	5.98897	1.56051	0.124416	0.995998	-4.34931	NOT	PITX2
FAM110D	-0.148883	3.61984	-1.5601	0.124512	0.995998	-4.34959	NOT	FAM110D
B3GALNT1	0.768705	6.50535	1.55986	0.12457	0.995998	-4.34976	NOT	B3GALNT1
FBXO41	0.253444	4.83668	1.5598	0.124583	0.995998	-4.3498	NOT	FBXO41
STAT5B	0.254105	4.71599	1.55976	0.124592	0.995998	-4.34982	NOT	STAT5B
NAF1	-0.0797334	3.26687	-1.55953	0.124647	0.995998	-4.34999	NOT	NAF1
TNP1	-0.0999437	3.4165	-1.55931	0.1247	0.995998	-4.35014	NOT	TNP1
KIF23	-0.332018	7.86219	-1.55927	0.124708	0.995998	-4.35016	NOT	KIF23
PIK3CD	-0.0994886	3.35056	-1.55888	0.1248	0.995998	-4.35044	NOT	PIK3CD
TMEM107	0.474332	6.88904	1.5586	0.124867	0.995998	-4.35063	NOT	TMEM107
CARD11	-0.0977098	3.46467	-1.55856	0.124876	0.995998	-4.35066	NOT	CARD11
ALDH2	0.796967	6.9434	1.55801	0.125008	0.995998	-4.35105	NOT	ALDH2
OR10S1	0.0812583	2.95052	1.55799	0.125013	0.995998	-4.35106	NOT	OR10S1
MBTPS2	0.328968	6.43224	1.55787	0.12504	0.995998	-4.35114	NOT	MBTPS2
OR8D4	0.0786829	2.87134	1.55768	0.125084	0.995998	-4.35127	NOT	OR8D4
SEPTIN3	0.261888	3.80953	1.55767	0.125087	0.995998	-4.35128	NOT	SEPTIN3
NDUFAF1	0.411661	7.03527	1.55748	0.125132	0.995998	-4.35141	NOT	NDUFAF1
KRT4	-0.306189	3.58091	-1.55711	0.12522	0.995998	-4.35167	NOT	KRT4
PMM1	0.343655	6.46626	1.55709	0.125225	0.995998	-4.35168	NOT	PMM1
RNF144B	0.241146	3.72095	1.55702	0.125243	0.995998	-4.35174	NOT	RNF144B
TM4SF19	-0.167255	3.60421	-1.55691	0.125268	0.995998	-4.35181	NOT	TM4SF19
ESF1	0.322911	7.94315	1.55687	0.125278	0.995998	-4.35184	NOT	ESF1
ITGA4	0.307865	3.31472	1.55655	0.125354	0.995998	-4.35206	NOT	ITGA4
AURKA	-0.301795	10.0563	-1.55614	0.125451	0.995998	-4.35235	NOT	AURKA
NENF	0.329827	8.61129	1.55575	0.125543	0.995998	-4.35261	NOT	NENF
HLA-DQA1	0.058261	3.02083	1.55546	0.125613	0.995998	-4.35282	NOT	HLA-DQA1
TNPO2	0.308712	6.85862	1.55535	0.125638	0.995998	-4.35289	NOT	TNPO2
ZNF546	-0.103036	3.36348	-1.55528	0.125655	0.995998	-4.35294	NOT	ZNF546
DNMT3B	-0.352936	4.50933	-1.55484	0.12576	0.995998	-4.35325	NOT	DNMT3B
KCNF1	-0.385505	3.4438	-1.55433	0.125881	0.995998	-4.3536	NOT	KCNF1
DLGAP2	-0.149698	3.30776	-1.5542	0.125912	0.995998	-4.35369	NOT	DLGAP2
STK17B	-0.287778	4.05214	-1.55418	0.125918	0.995998	-4.35371	NOT	STK17B
ARG1	-0.0837256	2.91727	-1.55399	0.125963	0.995998	-4.35384	NOT	ARG1
ASB13	0.319623	4.48704	1.55378	0.126013	0.995998	-4.35398	NOT	ASB13
MAPK12	0.405055	5.20495	1.55375	0.126021	0.995998	-4.35401	NOT	MAPK12
KLK4	0.0592301	2.96872	1.5533	0.126128	0.995998	-4.35432	NOT	KLK4
CHRND	0.0683632	3.24262	1.55323	0.126144	0.995998	-4.35437	NOT	CHRND
MORC2	-0.323679	8.20504	-1.55283	0.126239	0.995998	-4.35464	NOT	MORC2
SNAP29	0.201062	5.34146	1.55254	0.126308	0.995998	-4.35484	NOT	SNAP29
CEACAM16	0.180967	3.19611	1.55242	0.126338	0.995998	-4.35493	NOT	CEACAM16
RAB3A	0.173753	3.83029	1.55239	0.126344	0.995998	-4.35495	NOT	RAB3A
YLPM1	0.373845	6.92443	1.5523	0.126367	0.995998	-4.35501	NOT	YLPM1
CLIP1	-0.344956	5.87366	-1.55149	0.12656	0.995998	-4.35557	NOT	CLIP1
ITPRID1	0.171047	3.03357	1.55075	0.126738	0.995998	-4.35609	NOT	ITPRID1
ITLN2	-0.210618	3.43056	-1.55016	0.126879	0.995998	-4.35649	NOT	ITLN2
CEACAM7	-0.0949381	3.0742	-1.54894	0.127171	0.995998	-4.35734	NOT	CEACAM7
SH3D19	-0.322807	3.98782	-1.54868	0.127234	0.995998	-4.35752	NOT	SH3D19
TRAPPC10	-0.185519	5.08391	-1.5481	0.127373	0.995998	-4.35792	NOT	TRAPPC10
TBPL1	0.406285	8.77158	1.54806	0.127383	0.995998	-4.35795	NOT	TBPL1
BCOR	0.337704	6.16901	1.54795	0.127409	0.995998	-4.35802	NOT	BCOR
RGS5	0.753868	4.11722	1.5478	0.127445	0.995998	-4.35813	NOT	RGS5
GRIN2D	0.0768756	2.93363	1.54778	0.12745	0.995998	-4.35814	NOT	GRIN2D
LINC00303	-0.107526	3.23302	-1.54762	0.127489	0.995998	-4.35825	NOT	LINC00303
SLC25A1	0.329549	5.7658	1.54745	0.12753	0.995998	-4.35837	NOT	SLC25A1
LILRA5	-0.104111	3.15264	-1.54722	0.127586	0.995998	-4.35853	NOT	LILRA5
TKT	0.350312	7.77598	1.547	0.127637	0.995998	-4.35868	NOT	TKT
ARHGAP10	0.442346	4.88887	1.54629	0.127809	0.995998	-4.35917	NOT	ARHGAP10
TXLNGY	0.811238	4.03188	1.54623	0.127825	0.995998	-4.35922	NOT	TXLNGY
KRTAP2-1	-0.0844644	3.04232	-1.54584	0.127919	0.995998	-4.35949	NOT	KRTAP2-1
C10orf88	0.398355	5.42989	1.54548	0.128005	0.995998	-4.35973	NOT	C10orf88
MRVI1-AS1	0.0930521	3.11002	1.54543	0.128017	0.995998	-4.35977	NOT	MRVI1-AS1
MRI1	0.179761	4.19192	1.54538	0.128029	0.995998	-4.3598	NOT	MRI1
VPS4B	0.26567	5.13878	1.54482	0.128164	0.995998	-4.36019	NOT	VPS4B
YIPF1	-0.349514	7.05817	-1.54471	0.128191	0.995998	-4.36026	NOT	YIPF1
PMAIP1	0.60668	8.75086	1.54412	0.128335	0.995998	-4.36067	NOT	PMAIP1
DTX1	0.313356	3.7715	1.54401	0.12836	0.995998	-4.36075	NOT	DTX1
TRERF1	0.417718	5.35353	1.54259	0.128705	0.995998	-4.36173	NOT	TRERF1
MIR1915HG	0.28863	3.64084	1.54234	0.128765	0.995998	-4.3619	NOT	MIR1915HG
CHAMP1	0.49275	7.34955	1.54168	0.128927	0.995998	-4.36236	NOT	CHAMP1
ZFYVE21	-0.275047	5.26755	-1.54157	0.128954	0.995998	-4.36243	NOT	ZFYVE21
LIPN	0.0783064	2.99747	1.54154	0.128959	0.995998	-4.36245	NOT	LIPN
RPS6	0.229475	12.386	1.54129	0.12902	0.995998	-4.36262	NOT	RPS6
NCAPG	-0.383099	6.7161	-1.54053	0.129205	0.995998	-4.36315	NOT	NCAPG
ZBTB37	0.0676531	3.21443	1.5399	0.129359	0.995998	-4.36358	NOT	ZBTB37
MYH13	0.0685275	3.10345	1.5397	0.129407	0.995998	-4.36372	NOT	MYH13
GUCA2B	0.0901227	2.98276	1.53954	0.129447	0.995998	-4.36383	NOT	GUCA2B
NCAM2	0.53521	3.65186	1.53909	0.129556	0.995998	-4.36414	NOT	NCAM2
COMMD7	-0.317023	8.82176	-1.53904	0.129569	0.995998	-4.36418	NOT	COMMD7
LGALS2	-0.17819	2.81461	-1.53899	0.12958	0.995998	-4.36421	NOT	LGALS2
TRMT12	-0.390472	7.42463	-1.53875	0.12964	0.995998	-4.36438	NOT	TRMT12
KRTAP10-8	0.131573	3.61128	1.53874	0.129641	0.995998	-4.36438	NOT	KRTAP10-8
GFM1	-0.219164	8.28962	-1.53839	0.129727	0.995998	-4.36462	NOT	GFM1
DOK1	0.116572	3.51417	1.53826	0.129758	0.995998	-4.36471	NOT	DOK1
DCTN5	-0.190699	4.3639	-1.5382	0.129775	0.995998	-4.36476	NOT	DCTN5
INKA1	0.253367	3.88685	1.53736	0.129979	0.995998	-4.36533	NOT	INKA1
IDI1	-0.499542	8.56505	-1.53655	0.130178	0.995998	-4.36589	NOT	IDI1
RNF19A	-0.434584	6.52699	-1.53641	0.130212	0.995998	-4.36599	NOT	RNF19A
WDR49	0.0935464	2.93919	1.53637	0.130221	0.995998	-4.36601	NOT	WDR49
INSR	-0.466624	4.93567	-1.53632	0.130234	0.995998	-4.36605	NOT	INSR
TMEM255A	0.234264	3.35762	1.53619	0.130266	0.995998	-4.36614	NOT	TMEM255A
C8G	-0.159777	3.19449	-1.53598	0.130316	0.995998	-4.36628	NOT	C8G
SLC16A11	0.0893567	3.16776	1.53583	0.130353	0.995998	-4.36638	NOT	SLC16A11
ENAM	-0.107183	3.09035	-1.53548	0.130439	0.995998	-4.36662	NOT	ENAM
ZBTB3	-0.213029	4.19131	-1.5353	0.130484	0.995998	-4.36675	NOT	ZBTB3
PJVK	-0.535558	3.76996	-1.53528	0.130488	0.995998	-4.36676	NOT	PJVK
MAPKAP1	-0.250442	6.15626	-1.53521	0.130505	0.995998	-4.36681	NOT	MAPKAP1
TRAF1	-0.0800079	3.18776	-1.53509	0.130534	0.995998	-4.36689	NOT	TRAF1
CNOT6L	-0.286732	4.10729	-1.53496	0.130566	0.995998	-4.36698	NOT	CNOT6L
PPP1R7	-0.21887	8.32922	-1.5347	0.130631	0.995998	-4.36716	NOT	PPP1R7
GPX4	-0.273981	11.2531	-1.53445	0.130692	0.995998	-4.36733	NOT	GPX4
OR1I1	-0.0871672	2.98346	-1.53313	0.131016	0.995998	-4.36824	NOT	OR1I1
CNTFR	0.147359	3.3189	1.53295	0.131061	0.995998	-4.36836	NOT	CNTFR
C12orf71	0.111205	2.91343	1.53286	0.131084	0.995998	-4.36843	NOT	C12orf71
ATRAID	-0.245143	9.63225	-1.53277	0.131105	0.995998	-4.36849	NOT	ATRAID
PGD	-0.468712	8.50283	-1.53273	0.131114	0.995998	-4.36851	NOT	PGD
SPRR1A	-0.440366	3.23132	-1.53268	0.131128	0.995998	-4.36855	NOT	SPRR1A
NR1H4	-0.276444	2.96809	-1.53248	0.131176	0.995998	-4.36868	NOT	NR1H4
HSCB	0.380974	6.45463	1.53133	0.131461	0.995998	-4.36947	NOT	HSCB
PERP	-1.00421	7.08441	-1.53093	0.131558	0.995998	-4.36975	NOT	PERP
ABCA10	0.0949394	2.92135	1.53028	0.131719	0.995998	-4.37019	NOT	ABCA10
CDS1	-0.803389	5.57993	-1.5302	0.131739	0.995998	-4.37025	NOT	CDS1
ANAPC10	-0.333831	7.56282	-1.5292	0.131986	0.995998	-4.37093	NOT	ANAPC10
STARD13	-0.379821	3.70355	-1.52893	0.132054	0.995998	-4.37112	NOT	STARD13
NAA16	0.297564	4.17852	1.52833	0.132202	0.995998	-4.37153	NOT	NAA16
HMG20B	-0.458332	6.97946	-1.52804	0.132274	0.995998	-4.37172	NOT	HMG20B
GDPD2	0.086462	3.13008	1.52749	0.132411	0.995998	-4.3721	NOT	GDPD2
FABP1	-0.087278	2.79447	-1.52721	0.132481	0.995998	-4.3723	NOT	FABP1
ARRDC2	-0.585076	5.64064	-1.52676	0.132592	0.995998	-4.3726	NOT	ARRDC2
LCE1F	0.0671742	3.03956	1.52663	0.132624	0.995998	-4.37269	NOT	LCE1F
CCND2	0.677066	3.55784	1.52614	0.132744	0.995998	-4.37302	NOT	CCND2
ACTN4	-0.261416	4.99498	-1.52592	0.1328	0.995998	-4.37317	NOT	ACTN4
CSMD1	0.185132	3.07174	1.52576	0.13284	0.995998	-4.37328	NOT	CSMD1
SLC22A9	-0.0640763	2.93544	-1.52576	0.132841	0.995998	-4.37329	NOT	SLC22A9
PDHA1	0.340725	9.26929	1.52552	0.132901	0.995998	-4.37345	NOT	PDHA1
KRTAP5-4	0.0799948	3.19505	1.52547	0.132912	0.995998	-4.37348	NOT	KRTAP5-4
PLA2G2F	-0.0910566	2.80338	-1.52537	0.132937	0.995998	-4.37355	NOT	PLA2G2F
CCDC51	0.345531	6.79993	1.52513	0.132996	0.995998	-4.37371	NOT	CCDC51
RFX7	0.379428	4.57514	1.52503	0.133022	0.995998	-4.37378	NOT	RFX7
TERF2	0.217494	5.88164	1.52442	0.133175	0.995998	-4.3742	NOT	TERF2
CENPE	-0.39504	7.66695	-1.52428	0.133209	0.995998	-4.3743	NOT	CENPE
GRIN3A	-0.248682	3.28502	-1.52423	0.133222	0.995998	-4.37433	NOT	GRIN3A
IPCEF1	-0.239299	3.24185	-1.52413	0.133247	0.995998	-4.3744	NOT	IPCEF1
ZBED4	0.278742	4.52928	1.52404	0.133269	0.995998	-4.37446	NOT	ZBED4
ORC2	-0.30263	5.60264	-1.52399	0.133282	0.995998	-4.3745	NOT	ORC2
ABTB2	-0.281483	3.96811	-1.52396	0.133288	0.995998	-4.37451	NOT	ABTB2
SLC16A5	-0.0729544	3.35353	-1.52335	0.13344	0.995998	-4.37493	NOT	SLC16A5
UQCRQ	-0.203758	9.68199	-1.52322	0.133473	0.995998	-4.37502	NOT	UQCRQ
TSACC	-0.369176	4.30545	-1.52289	0.133556	0.995998	-4.37525	NOT	TSACC
HSD52	0.0649425	2.89938	1.5226	0.133627	0.995998	-4.37544	NOT	HSD52
KRTAP5-10	-0.091114	3.13827	-1.5226	0.133628	0.995998	-4.37544	NOT	KRTAP5-10
FAM181B	-0.124982	3.20223	-1.52253	0.133646	0.995998	-4.37549	NOT	FAM181B
KLHL5	-0.461919	4.78399	-1.52221	0.133725	0.995998	-4.3757	NOT	KLHL5
[truncated: 15,282 more rows]
