# Supplementary material for: DNAH10 mutation correlates with cisplatin sensitivity and tumor mutation burden in small-cell lung cancer
Source: Aging (Albany NY). 2020 Jan 20;12(2):1285–303. doi: 10.18632/aging.102683 (PMC7053592; doi:10.18632/aging.102683)
Supplement: Supplementary Table 6 [file aging-12-102683-s010..xlsx]

## Sheet: Suppl Table 6
	COLO-668	COR-L279	COR-L311	COR-L32	COR-L95	CPC-N	DMS-114	DMS-273	DMS-53	DMS-79	IST-SL1	LB647-SCLC	LU-134-A	LU-135	LU-139	MS-1	NCI-H1048	NCI-H1092	NCI-H1105	NCI-H1304	NCI-H1341	NCI-H1417	NCI-H1436	NCI-H146	NCI-H1688	NCI-H1836	NCI-H1876	NCI-H196	NCI-H1963	NCI-H209	NCI-H211	NCI-H2141	NCI-H2227	NCI-H345	NCI-H446	NCI-H524	NCI-H526	NCI-H69	NCI-H82	NCI-H841	NCI-H847	SBC-3	SBC-5	SHP-77	COR-L88	IST-SL2	LU-165	NCI-H1694	NCI-H187
GLYCOLYSIS_GLUCONEOGENESIS	0.240649	0.256373	0.280606	-0.014802	-0.119419	0.129253	-0.159275	0.109416	0.202895	0.333776	-0.436867	-0.310996	-0.172323	-0.00905404	-0.352233	0.296149	0.259419	0.195914	-0.142897	-0.12423	0.157446	0.134868	-0.0845178	0.212575	0.202022	-0.0806666	-0.103795	-0.0245986	-0.263805	-0.283618	-0.186388	-0.168991	-0.0281011	-0.202964	0.0535117	0.22224	0.117751	0.0363667	0.240653	-0.214992	0.078803	0.0727971	0.0795967	0.059347	0.0834252	-0.160328	-0.0202555	0.150918	-0.0893045
CITRATE_CYCLE_TCA_CYCLE	0.313592	0.209393	0.401104	-0.478595	0.00322593	0.108647	-0.00226311	0.393162	0.482349	-0.0831659	-0.427856	-0.338873	-0.19597	0.0562332	-0.391474	0.561555	0.408378	-0.0875102	-0.12817	-0.134786	0.298967	-0.213149	-0.377083	0.119141	0.498487	-0.599033	-0.326094	0.0395836	-0.406331	-0.371983	-0.105236	-0.380467	0.0908824	-0.301634	-0.287217	0.383425	0.429821	0.0314415	0.412507	-0.460682	0.225459	0.188477	0.246134	0.156842	-0.397578	-0.184227	-0.129766	0.219528	0.325264
PENTOSE_PHOSPHATE_PATHWAY	0.120006	0.254456	-0.0313938	-0.172124	-0.15575	0.102681	0.135306	0.351294	0.110219	0.264365	-0.318278	-0.457934	-0.353558	0.0964102	-0.4067	0.337854	-0.156323	-0.0324507	0.0508375	0.0864927	-0.00209563	0.0678389	0.273038	0.0857111	0.0982853	-0.113862	-0.242468	-0.204714	-0.232734	-0.22493	0.0827999	-0.416757	0.399231	0.0696285	-0.145365	0.221423	0.230271	-0.301562	0.242364	-0.276113	-0.165217	0.276977	0.251402	-0.11294	0.177399	-0.132272	-0.119919	0.171616	-0.304312
PENTOSE_AND_GLUCURONATE_INTERCONVERSIONS	0.413646	-0.143118	-0.202924	-0.330205	-0.171352	-0.193687	-0.156122	0.259119	0.230162	0.327739	-0.0288921	5.49e-05	-0.00341425	0.0918444	-0.376734	-0.223733	-0.110938	-0.176209	-0.251559	0.287655	-0.35882	-0.165001	-0.284041	0.178833	0.33013	-0.0831865	-0.223728	0.505267	0.00613321	-0.030934	0.396658	-0.224881	0.299064	0.240297	-0.178455	-0.234959	0.448652	-0.419177	0.0387121	-0.1196	-0.491518	-0.169288	0.150228	-0.0220457	-0.0688433	-0.23674	0.083356	0.218755	-0.022097
FRUCTOSE_AND_MANNOSE_METABOLISM	0.288388	0.545274	0.0829302	0.0174468	-0.151247	0.330251	-0.141521	0.0377819	0.320986	0.365434	-0.331744	-0.457438	-0.0947233	0.0978507	-0.113202	0.343255	0.11247	0.224116	0.0228057	-0.222474	0.0885308	0.0325449	0.0686179	0.22907	0.30987	0.215363	-0.325851	-0.344668	-0.274256	0.279455	-0.0768918	-0.0897499	-0.13596	-0.0572998	0.00562848	0.287047	0.0519683	-0.0949563	0.0963758	-0.424592	-0.19119	-0.138315	0.0406665	0.0595124	0.0137684	-0.0585872	-0.0904311	-0.272553	-0.0666957
GALACTOSE_METABOLISM	0.228176	0.109063	-0.0274356	0.128858	-0.100381	0.142185	0.201156	0.0918909	0.241521	0.237899	-0.154401	-0.30855	-0.0387025	-0.215203	0.0544009	0.428426	0.258173	-0.242852	-0.226879	-0.173402	-0.219111	-0.214946	-0.281444	0.102076	0.323549	-0.287219	-0.364646	0.188915	-0.0897581	-0.301498	-0.033642	-0.394668	-0.227691	-0.327377	-0.251112	0.10084	0.126468	-0.150857	0.4897	-0.0176094	-0.0580706	0.256804	0.330132	0.140583	-0.447262	-0.00193055	0.163343	0.166615	0.203371
ASCORBATE_AND_ALDARATE_METABOLISM	0.572456	-0.404427	-0.0965703	-0.574361	-0.242508	-0.29691	-0.249645	0.147005	0.379002	0.309219	0.263322	-0.0164007	-0.331368	0.0475958	-0.479507	-0.211343	-0.129164	-0.129985	-0.297343	0.260761	0.0226904	-0.385582	-0.210917	0.265211	0.43171	-0.299648	0.107252	0.340656	0.101934	-0.192634	0.0301396	-0.21335	0.224884	0.0942674	-0.0294428	-0.219107	0.440846	-0.076505	0.0316124	-0.0134317	-0.315093	0.204314	-0.0314071	0.107806	-0.172294	0.283351	-0.161827	0.131393	0.0122789
FATTY_ACID_METABOLISM	-0.0254733	-0.0440653	0.175454	-0.476235	0.0925197	-0.0738702	-0.0187048	-0.0365602	0.203368	0.0311112	-0.339768	-0.318583	-0.0772079	-0.238917	-0.072475	0.0740648	0.424488	-0.188633	-0.0277044	-0.213379	0.30018	0.0469609	-0.140959	-0.0384093	0.397321	-0.248376	0.0464409	0.14269	-0.205827	-0.109509	0.205867	-0.342288	0.257059	-0.0932442	-0.297645	-0.203028	0.270885	-0.229117	0.222549	0.301392	-0.0219842	0.207989	0.302275	0.113438	-0.347181	0.132004	-0.0270726	0.0970166	-0.11837
STEROID_BIOSYNTHESIS	0.204513	-0.0785749	0.373417	0.230545	-0.176417	0.196891	0.137959	-0.332778	0.455666	0.490206	-0.602855	-0.482899	-0.341041	-0.535076	0.188675	-0.305879	-0.183654	0.494279	0.152888	-0.0855877	0.229218	-0.396014	0.364964	0.126446	0.407431	-0.42384	-0.0379708	0.399644	0.0168738	0.533953	0.105738	-0.495012	-0.0636594	-0.0535253	-0.408893	-0.141946	0.258018	0.281097	0.159762	-0.357707	-0.0681165	-0.335049	-0.108681	-0.606762	0.00400183	0.477539	0.38717	0.120839	-0.221595
PRIMARY_BILE_ACID_BIOSYNTHESIS	0.202521	0.0973035	-0.193263	-0.229196	0.200511	0.0718808	-0.0261003	0.21789	0.38701	0.0553272	0.0636084	-0.285587	0.170066	0.183472	-0.0360178	-0.0338141	0.449365	-0.421999	-0.264487	-0.0839579	-0.341589	0.254045	-0.0167789	-0.0662504	0.411325	-0.237671	0.0717353	0.179991	-0.385122	-0.250581	0.287236	-0.426506	-0.275219	0.364512	0.0257255	-0.433366	0.0694228	0.141209	-0.223416	0.178064	-0.0755209	0.259407	-0.109047	0.0486955	-0.22556	0.188275	0.224519	-0.438574	-0.0075735
STEROID_HORMONE_BIOSYNTHESIS	0.319483	-0.211922	0.130348	-0.0019395	0.191026	0.0347144	-0.313878	0.115919	0.406919	-0.0948866	-0.106825	-0.329326	-0.289685	0.0402653	-0.230644	0.0432791	0.0245314	0.0523692	-0.178721	0.0904084	0.0108693	0.323503	0.148002	0.227483	0.319648	0.0781642	-0.122281	0.303442	-0.153949	-0.16198	0.251292	-0.311304	-0.223128	-0.0145272	0.196181	-0.170352	0.0722237	0.0910803	-0.150582	-0.215917	-0.333793	-0.0319593	-0.0849028	0.274641	0.187935	0.0831266	-0.157886	-0.146093	-0.0713016
OXIDATIVE_PHOSPHORYLATION	-0.0697469	-0.0899763	-0.110888	-0.053173	0.0496842	-0.0429096	0.257176	-0.106986	0.300874	-0.138023	-0.310549	-0.155665	-0.257712	0.212901	0.0863271	0.300126	0.300327	-0.0491953	0.0204621	-0.29672	0.106052	0.149788	-0.0302419	-0.113983	0.373718	-0.142533	-0.194067	-0.252555	0.0266419	0.0328773	0.149861	-0.128741	0.154803	-0.161277	-0.155447	-0.215807	0.188406	0.229379	-0.164534	-0.290085	-0.0374557	-0.296025	0.269127	0.00717668	0.0214111	0.105088	0.217132	-0.00295159	0.340267
PURINE_METABOLISM	0.0445028	0.0237275	0.0300257	-0.211775	-0.0620334	0.227798	-0.116183	0.316091	-0.124413	-0.21181	-0.0420814	0.0977704	-0.188097	0.0245524	0.0777399	0.244849	0.00749202	0.0210745	-0.135233	0.199066	-0.122197	-0.0779468	-0.229085	0.17803	-0.090387	-0.198135	-0.266438	-0.15565	0.0044956	-0.00691349	0.0721351	-0.218523	-0.00627345	-0.0678411	-0.00117709	0.23524	0.133801	0.124993	0.355933	0.0617895	-0.0284826	0.179538	0.183493	0.0573102	-0.0228773	-0.0563196	-0.0946178	0.194877	-0.119005
PYRIMIDINE_METABOLISM	0.0900805	-0.0441048	-0.00179673	-0.255682	-0.116748	0.319272	-0.0677374	0.149114	-0.226079	-0.322221	0.0166313	0.0707005	0.0173904	0.18736	0.171109	0.104615	0.01537	-0.0192097	0.0620444	0.3303	-0.0593333	-0.160248	-0.179884	0.119069	-0.17767	-0.125182	-0.122937	-0.0754278	0.139056	0.105412	0.159928	-0.212957	0.0491766	0.00749508	-0.0105251	0.139349	0.136298	0.0690002	0.0624397	-0.0272989	-0.156335	-0.0434514	0.104874	-0.10648	0.0864828	-0.110298	-0.0852465	0.155602	0.0257527
ALANINE_ASPARTATE_AND_GLUTAMATE_METABOLISM	0.363222	0.2383	-0.223741	-0.273813	-0.0848051	0.0296306	-0.281632	0.283052	0.254975	0.238634	0.260323	-0.063208	0.278598	-0.0122193	0.107965	0.122869	0.0310644	0.015203	-0.395303	0.058613	-0.214987	-0.234547	-0.286242	0.170142	0.286069	-0.281743	-0.365743	-0.208394	-0.103051	-0.344024	0.0849948	-0.346875	-0.0648206	-0.392278	0.00257952	0.00325335	0.232264	0.320146	0.166711	-0.0551844	-0.0851788	0.0380383	0.414104	0.425986	-0.00325467	-0.163197	0.0348647	-0.0811856	0.215387
GLYCINE_SERINE_AND_THREONINE_METABOLISM	0.2799	0.276139	0.175399	-0.0744731	-0.0344665	0.0432812	-0.161878	0.182547	0.0308553	-0.0395233	0.0966672	0.263182	0.251715	0.0563062	0.0371024	0.201341	0.106821	-0.033098	-0.106365	0.129017	-0.0358473	0.132521	-0.278819	0.0491647	0.409237	0.0979391	-0.353022	-0.00494691	-0.183241	-0.340499	-0.134822	-0.023429	-0.150498	-0.150933	0.0774576	0.286217	-0.168701	-0.00791441	0.0794945	-0.109739	0.0418637	0.0976149	0.165776	0.3427	-0.118939	-0.124504	-0.25637	-0.103273	-0.216564
CYSTEINE_AND_METHIONINE_METABOLISM	-0.0219616	0.0504396	0.296504	0.0335316	-0.0987488	0.211213	-0.105756	0.311162	0.00722286	-0.16554	-0.381542	0.276819	-0.212659	-0.0654309	0.13197	0.225115	0.239665	0.188845	-0.392219	0.116227	0.0824669	0.024772	-0.196427	0.0332971	-0.0762064	-0.189159	0.053873	-0.170457	0.00238106	-0.268103	0.17601	-0.0919706	-0.0535312	-0.178234	-0.242549	0.205559	-0.122118	0.00427081	0.443347	-0.0366249	0.394491	0.20274	0.0950631	-0.189886	0.0611273	-0.213709	0.126067	-0.245329	-0.0240149
VALINE_LEUCINE_AND_ISOLEUCINE_DEGRADATION	0.262034	0.176042	0.0528784	-0.482533	0.0047501	-0.241272	0.0380805	0.275244	0.212598	0.0861158	-0.380377	-0.142832	-0.0464723	-0.344493	-0.187675	0.206102	0.0595355	-0.0937731	-0.186833	-0.061384	0.151795	-0.100908	-0.263377	0.0231058	0.417289	-0.434961	-0.157418	0.309004	-0.27369	-0.000756367	0.21238	-0.3614	0.242707	-0.149238	-0.276981	-0.0444034	0.323603	-0.212094	0.315527	-0.0212922	0.0853957	0.325194	0.214484	0.236521	-0.317558	-0.0277057	0.121547	0.13896	0.164484
VALINE_LEUCINE_AND_ISOLEUCINE_BIOSYNTHESIS	-0.167698	0.159947	-0.112421	-0.637644	-0.468411	0.115366	0.410347	0.700088	-0.0430325	-0.506904	-0.0928841	-0.0338468	-0.266881	-0.199759	-0.149294	0.294329	0.340067	-0.433379	-0.207218	0.341778	0.0558846	-0.344799	-0.517465	-0.180965	0.161842	-0.491401	-0.338195	0.0554767	-0.615254	-0.295947	0.315475	-0.276705	-0.179084	-0.541345	-0.0535272	0.600309	0.111119	0.31869	0.615604	0.47106	0.517947	0.478254	0.627573	0.123442	-0.330642	-0.426992	0.109142	-0.0531132	-0.416514
LYSINE_DEGRADATION	0.0710026	-0.199175	0.144992	-0.217896	-0.152402	-0.115494	-0.169402	0.0261286	-0.319641	-0.105845	-0.305521	-0.0991478	-0.109378	-0.167749	0.0588616	0.153449	0.271444	0.0633939	-0.0195833	0.171366	0.289162	-0.261004	0.033966	0.0261628	0.0803278	-0.162982	0.271594	0.0498473	-0.0432911	-0.0358479	0.119875	0.0404285	0.0856541	-0.164131	-0.266277	0.189868	0.362579	0.047599	0.146947	-0.256529	0.0396338	0.405611	0.0979509	-0.134328	-0.0232718	0.273413	-0.13028	-0.0750532	-0.140659
ARGININE_AND_PROLINE_METABOLISM	0.235343	0.0113237	0.0141591	-0.273268	-0.0820406	0.00922687	-0.021258	0.379328	0.386552	0.0250746	-0.175207	-0.206365	0.128289	-0.0106158	-0.0199715	0.333427	0.171742	-0.0764309	-0.393488	0.016631	0.0702068	0.000348634	-0.269696	-0.117568	0.257082	-0.208223	-0.116769	-0.0341278	-0.202997	-0.284129	-0.0659962	-0.211504	0.0140202	-0.345188	-0.0371261	0.256202	-0.0284756	0.0709657	0.214322	-0.066981	0.0791627	0.0718487	0.165273	0.315793	-0.108052	-0.103264	0.0959003	0.0828838	0.00549436
HISTIDINE_METABOLISM	0.248541	-0.110366	-0.0787999	-0.142723	-0.108494	0.146033	-0.160697	0.0011411	0.0339676	0.0207979	0.082984	-0.323279	-0.236059	-0.131299	0.0598141	-0.127963	-0.081956	0.0543913	0.0347224	0.062527	0.257332	-0.208085	-0.321223	-0.129898	0.308957	-0.0820213	-0.223056	0.271141	-0.227107	0.102721	-0.323029	-0.101743	0.122945	-0.152064	0.111498	0.075198	0.192181	-0.131456	0.311634	-0.0357288	-0.0411851	0.174805	0.222575	0.280146	-0.239742	0.0463385	-0.168429	-0.106222	-0.130146
TYROSINE_METABOLISM	0.232118	-0.0493827	-0.0644111	-0.0786254	0.00336292	0.191453	-0.264919	-0.0495502	0.235431	-0.0248235	0.0218628	-0.0965819	-0.310667	-0.228724	0.0934486	-0.187364	0.0918186	0.221011	-0.313812	-0.0172724	0.144458	0.175725	-0.151076	-0.12097	0.260892	0.0488107	-0.306857	0.017885	-0.21742	0.102738	0.23239	-0.239788	0.236034	0.0284258	0.101895	0.0354161	-0.17506	-0.0647573	0.33941	0.106377	0.00701607	0.0352836	0.0952127	0.255772	-0.00167962	-0.0517779	-0.0501268	-0.100034	0.0418885
PHENYLALANINE_METABOLISM	0.214583	0.327924	0.0483324	0.0724226	0.305915	0.0466223	-0.380683	-0.301045	0.42258	-0.105602	-0.0495835	0.133116	-0.491143	-0.0903397	0.28536	-0.00789954	-0.232377	0.268198	-0.427415	0.0763827	0.134697	-0.0477802	-0.221207	-0.164227	0.39057	0.274226	-0.203754	0.076507	-0.264328	-0.112914	0.0400551	-0.196526	-0.064272	-0.342649	0.224414	0.246457	-0.235109	-0.410596	0.271997	-0.12047	-0.155493	-0.228412	0.0574904	0.45428	0.22975	-0.0721594	0.0781355	-0.398633	-0.00608289
TRYPTOPHAN_METABOLISM	0.132005	0.104387	-0.00503732	-0.458782	0.0429248	0.0884812	-0.223785	0.269254	0.181145	0.10064	-0.200061	-0.212388	-0.282981	-0.18204	-0.177476	0.068697	0.275849	0.129519	-0.137762	0.350951	0.215622	0.0728526	-0.299026	-0.0284836	0.319367	-0.127355	-0.125525	0.203404	-0.197637	-0.184408	0.100974	-0.307986	-0.155683	-0.186012	-0.0257423	0.193721	0.100347	-0.131147	0.356292	-0.259825	0.151463	0.30934	-0.110126	0.12565	-0.331372	0.247173	-0.0630883	-0.14891	-0.161664
BETA_ALANINE_METABOLISM	0.258464	0.4094	-0.277355	-0.451979	-0.230256	-0.18245	-0.19221	-0.0127639	0.118502	-0.0914167	0.202615	-0.376883	0.0773573	0.0229379	-0.00473123	-0.0041216	-0.252046	0.216817	-0.37092	0.372145	-0.033756	-0.25635	0.249818	-0.0884007	0.498492	-0.239184	0.00178007	0.0250855	-0.231058	-0.210068	0.161613	-0.140143	0.397497	-0.151813	0.258988	-0.0440281	0.250258	-0.254401	0.365287	-0.211209	-0.248144	-0.0952679	0.21253	0.178856	0.0287298	0.14401	-0.270947	0.122266	-0.185105
TAURINE_AND_HYPOTAURINE_METABOLISM	0.0415846	-0.169855	0.130532	0.606974	-0.27954	0.288533	-0.272138	-0.291235	0.251972	-0.111455	-0.172713	-0.208917	0.339384	0.00317518	-0.0673909	0.220066	-0.065925	0.102822	-0.224764	0.482738	-0.172482	0.273434	0.460583	0.388349	-0.0179836	0.264912	0.196794	0.378097	-0.258117	-0.173881	-0.381921	0.41379	0.206108	0.203901	0.323058	0.408824	-0.372314	0.263291	-0.0919309	0.117285	0.478259	-0.37352	-0.32206	-0.00731532	-0.162928	-0.350732	0.199425	-0.594364	-0.31321
SELENOAMINO_ACID_METABOLISM	0.0526329	-0.275805	-0.134691	-0.441905	-0.485256	0.303487	-0.0647622	0.361536	-0.165734	-0.186323	-0.0587515	-0.12822	-0.12619	-0.456506	-0.0952896	0.077451	0.358605	-0.150915	-0.198136	0.0161684	0.214486	-0.140694	-0.433578	-0.0279049	-0.0104722	-0.441297	0.124402	0.160285	-0.237228	-0.236977	-0.394907	-0.0756727	0.128464	0.0438654	-0.0551314	0.395665	0.301708	0.15704	0.540703	0.321481	0.512092	0.422494	0.430113	0.350684	-0.285936	-0.140993	-0.190566	-0.249799	-0.224426
GLUTATHIONE_METABOLISM	0.122068	0.0928892	0.139691	-0.169073	-0.109888	0.0799131	-0.119805	0.00161623	0.242014	-0.0893009	-0.439813	-0.24296	-0.165111	-0.0343691	-0.185125	0.239478	0.163272	-0.211948	0.0480546	0.25947	0.258554	0.324812	0.101103	-0.0262064	0.41094	-0.0667206	-0.249217	0.158406	-0.323441	-0.345517	0.0746941	-0.205544	0.117059	-0.0701036	-0.207267	-0.10377	-0.0241833	0.0508485	0.0597967	-0.165678	-0.0949592	-0.155542	0.0401546	-0.0032381	0.211184	-0.178063	0.0399057	-0.0380449	0.153907
STARCH_AND_SUCROSE_METABOLISM	0.30896	0.14554	0.0974374	0.03662	0.0988991	-0.0455627	-0.259365	0.177982	0.381619	0.276935	-0.0265996	0.0697389	-0.283169	-0.0983846	-0.345629	0.164797	-0.00153146	-0.244358	-0.210408	0.155231	-0.24907	0.126735	-0.0833574	0.320366	0.164088	-0.0452573	-0.281216	0.230631	-0.208484	-0.286597	0.155933	-0.347614	-0.16574	-0.12944	0.0748699	-0.0251798	-0.155061	-0.255542	0.348574	0.0892895	-0.270567	-7.92e-05	-0.0604724	0.168847	-0.0895695	-0.21955	0.187671	0.0749136	0.300009
N_GLYCAN_BIOSYNTHESIS	0.1229	-0.149125	-0.188404	0.0551895	0.203756	-0.0244626	0.0707066	-0.025122	0.352396	-0.298727	0.262398	-0.267015	0.299962	-0.340723	-0.0261692	-0.0010033	-0.130521	0.171	-0.169248	-0.0975006	-0.380458	0.160426	-0.362066	-0.332442	0.46217	-0.319643	-0.148704	0.253237	-0.352694	-0.318042	-0.137007	0.0270809	-0.101826	0.198943	0.170704	0.0267401	0.0964578	-0.0390651	-0.104462	0.0851193	-0.0547008	0.239774	0.134832	0.361042	-0.171635	-0.186384	-0.179835	-0.357989	-0.154756
OTHER_GLYCAN_DEGRADATION	0.0623463	-0.00697833	-0.36431	-0.364168	-0.247965	0.33093	0.390014	-0.315306	0.380257	-0.0232987	-0.0472148	-0.493518	-0.168219	-0.547976	-0.110533	0.124655	0.434905	-0.44572	-0.0781584	0.406179	-0.385923	-0.361051	-0.46232	0.0401459	0.522999	-0.373255	-0.312826	0.718889	-0.613069	-0.248839	-0.0754648	-0.503115	0.0491139	-0.447631	-0.030732	0.254968	-0.23548	0.106227	0.219737	0.535881	-0.20361	0.487749	0.0513372	0.386317	-0.439286	-0.0117304	0.228246	-0.560398	-0.122634
O_GLYCAN_BIOSYNTHESIS	0.479984	-0.135134	0.308326	-0.0597936	0.433545	-0.339999	-0.164454	0.245965	0.398617	-0.0986056	-0.0478253	0.0179907	-0.297799	-0.3941	-0.0699334	-0.00396522	0.262067	0.267537	-0.26734	-0.380826	-0.0806827	-0.210036	0.0550369	0.101835	0.125321	-0.209179	-0.251992	0.112907	-0.0435647	0.16523	0.267754	-0.00317377	0.0407993	0.0467162	0.181085	-0.354553	0.120344	0.167042	-0.251022	-0.0780578	0.168642	-0.538147	-0.0195409	0.0967414	0.196951	-0.278701	-0.331532	0.205244	-0.271681
AMINO_SUGAR_AND_NUCLEOTIDE_SUGAR_METABOLISM	0.126746	0.379431	-0.314774	-0.264964	0.0840586	0.174651	-0.0576876	0.186998	0.328356	-0.0499466	-0.0306382	-0.157514	-0.13971	-0.0398444	-0.193255	0.346832	0.195447	-0.378337	-0.341953	-0.18837	0.0943897	-0.0572451	-0.236611	-0.0136782	0.365068	-0.144215	-0.431194	0.275002	-0.32565	-0.265059	-0.0491063	-0.44843	-0.13511	-0.318751	0.20438	0.107159	-0.0107406	-0.00726902	0.314405	0.262313	-0.048503	0.159766	0.378751	0.158418	-0.258548	-0.094031	-0.169113	0.0148954	0.0586102
GLYCOSAMINOGLYCAN_DEGRADATION	0.411276	-0.274081	-0.429016	-0.00922684	-0.127077	-0.246498	0.376792	-0.152128	0.137398	-0.390909	-0.429051	0.0971909	0.0519997	-0.292167	0.184927	0.184927	0.248433	-0.212986	0.267598	-0.145452	0.16813	-0.160108	-0.182088	-0.323456	0.362975	-0.16543	-0.0179158	0.661205	-0.16627	-0.328697	-0.267242	-0.353357	-0.197242	0.114488	-0.0839657	-0.307522	-0.179606	0.162972	-0.139327	0.311015	-0.0595639	-0.0128408	0.209245	0.271688	-0.47178	-0.25296	-0.260092	-0.186324	-0.0331339
GLYCOSAMINOGLYCAN_BIOSYNTHESIS_CHONDROITIN_SULFATE	-0.123866	-0.0626384	-0.00788569	-0.208561	-0.0656465	0.0298707	0.344671	0.354028	0.235638	-0.142455	-0.201082	0.198277	0.124236	-0.149433	-0.0927673	0.169439	0.104994	0.167242	0.0717507	-0.38561	0.332091	-0.173213	-0.150884	-0.0730829	-0.0971316	-0.256791	-0.248342	0.501182	-0.143219	-0.163929	-0.294086	0.123372	0.170366	-0.1794	0.101248	-0.192679	-0.0906171	-0.284592	-0.426387	0.506657	-0.0357983	-0.0477168	0.343993	0.216836	-0.118553	-0.121556	0.146872	0.0271749	-0.276666
GLYCOSAMINOGLYCAN_BIOSYNTHESIS_KERATAN_SULFATE	-0.087003	-0.0589269	-0.164978	-0.0666371	0.0828647	-0.181413	0.105877	0.345773	0.0427108	0.127005	-0.0900916	0.191124	-0.0109099	0.129049	0.131537	0.220276	0.387648	0.12231	0.224861	-0.421809	0.0362736	-0.251202	-0.322225	0.17933	-0.0902512	-0.34975	0.267097	0.395607	0.093622	-0.246485	-0.133769	-0.39888	0.114786	0.150453	-0.10409	0.0728467	0.374681	-0.329183	0.136103	0.04954	0.0492076	-0.40045	0.026702	-0.384477	-0.333962	0.098053	-0.159373	0.367131	0.111561
GLYCOSAMINOGLYCAN_BIOSYNTHESIS_HEPARAN_SULFATE	-0.0103815	-0.0373535	-0.0791976	-0.279701	-0.0113981	0.0568799	0.185	0.214973	0.326022	0.0133122	-0.000447128	0.309773	0.15008	-0.216813	0.192927	0.175104	0.0250405	0.246974	0.0162766	0.00761536	0.0377147	-0.180918	-0.177133	-0.211927	0.145736	-0.292262	-0.323373	0.0813705	-0.248554	0.160752	-0.21123	-0.0142051	0.114767	0.204219	0.271029	-0.062037	-0.104754	-0.0900308	-0.128581	0.360619	0.252906	-0.0826518	0.24347	0.268956	-0.384484	-0.132139	0.198572	0.224197	-0.37474
GLYCEROLIPID_METABOLISM	0.208778	0.183351	-0.181937	-0.374046	0.0139479	-0.08534	-0.216903	-0.114099	0.0114377	0.178208	-0.113122	-0.102929	-0.102673	0.108237	-0.0741166	0.0846581	-0.0322926	0.0662082	0.036643	0.162437	0.0484789	0.230503	-0.0856674	0.0127859	0.43108	-0.0428986	-0.133274	0.105847	-0.135413	-0.0907988	-0.113253	0.00969494	-0.0240646	0.0508916	-0.0913267	0.225525	0.17822	0.0416309	0.082315	-0.0990599	0.172556	-0.154568	-0.063324	-0.185632	-0.298715	0.0196477	0.066603	0.0695107	-0.246837
INOSITOL_PHOSPHATE_METABOLISM	-0.131723	-0.178025	0.0641026	-0.0634732	0.0518129	0.0878093	0.0234279	-0.0956719	0.106748	-0.169944	-0.0822081	-0.0653243	-0.0184213	0.13594	-0.0943967	-0.213707	0.127431	0.0163428	-0.018615	-0.0625051	-0.0137804	-0.197909	0.12982	0.261984	-0.211698	0.0773929	0.094909	0.0522047	-0.0505921	-0.017043	-0.056191	0.179801	0.179261	0.0930198	-0.0026348	-0.172888	0.232039	0.0149777	-0.290284	0.0813888	-0.27726	0.101456	0.0266489	0.113597	-0.00567767	-0.110531	-0.0559367	0.244788	-0.065341
GLYCOSYLPHOSPHATIDYLINOSITOL_GPI_ANCHOR_BIOSYNTHESIS	0.178716	-0.21802	-0.240957	-0.274774	0.176447	0.0136102	0.0509368	-0.0863291	0.20386	-0.392905	0.338446	-0.296792	-0.175508	-0.509026	-0.36817	-0.410384	-0.0965529	0.136668	0.192522	0.067951	-0.165428	-0.0731513	-0.176389	0.138888	-0.0700689	-0.132761	-0.344231	0.399835	0.148465	-0.0517586	-0.121097	0.0478955	0.333462	0.492425	-0.262083	-0.0376817	-0.264911	-0.1214	0.0605084	0.139618	-0.0976929	0.0342614	0.292266	0.125368	0.0381257	0.260968	0.0190997	-0.0272416	0.181748
GLYCEROPHOSPHOLIPID_METABOLISM	0.122141	0.0961362	0.192998	-0.260948	-0.0365742	0.242675	-0.137239	-0.195528	-0.00270013	-0.0566829	-0.117157	-0.276825	0.0721955	0.0499765	0.136968	0.045494	-0.0245534	-0.0732892	0.266498	0.00184246	-0.135825	0.0734575	0.123386	0.0361605	0.24568	0.14406	0.0345646	0.0685464	-0.247678	-0.123351	0.168466	0.0231347	-0.11823	0.236504	-0.300766	0.0953692	0.121029	0.0941636	0.044167	-0.133835	0.124869	-0.0130833	0.0785846	-0.0833506	-0.239471	-0.157865	-0.301006	-0.234758	-0.000790319
ETHER_LIPID_METABOLISM	0.141397	0.186909	0.177311	-0.243788	-0.160324	0.140903	-0.138969	0.00398862	0.175974	0.0212105	-0.209482	-0.389581	0.0202759	-0.0757333	-0.0239262	-0.00772365	0.452924	-0.0229811	-0.00622731	0.0714856	0.0987758	-0.0566653	0.266513	-0.0886551	0.317718	0.0195274	0.222771	0.3172	-0.14891	-0.180241	0.237869	-0.142959	-0.0791864	0.0164208	0.0223536	0.00918088	0.133911	0.0565583	0.260279	0.0297855	0.126797	0.155554	0.126583	-0.235296	-0.37721	-0.258116	-0.448949	-0.294988	0.205812
ARACHIDONIC_ACID_METABOLISM	0.190352	0.215928	0.275102	-0.0848775	-0.149423	0.116809	-0.193971	0.191531	0.149936	-0.0663581	-0.282868	-0.333239	0.0502908	0.105034	-0.243654	0.130331	0.10235	0.00206612	0.154713	0.278412	0.0422164	0.227283	-0.0726132	0.204821	0.265709	0.141547	0.00982524	0.246479	-0.342293	-0.284877	-0.019767	0.00550885	-0.155487	-8.38e-05	-0.059971	0.137274	0.161358	0.0616341	-0.146558	-0.0482347	-0.0867924	-0.0833193	0.0671091	-0.000396197	0.0873016	-0.111033	-0.0822085	-0.306673	-0.212419
LINOLEIC_ACID_METABOLISM	0.0535282	0.231091	0.303957	-0.00447403	0.0398106	0.07579	-0.12701	0.245275	0.282405	-0.000351526	-0.31484	-0.345575	-0.161803	-0.421244	-0.164371	-0.0178024	0.0327755	0.169448	0.147315	0.225866	0.26799	0.399162	0.348588	0.212679	0.213841	0.239475	0.178446	0.332245	-0.28149	-0.092377	0.110575	-0.0120057	-0.453762	0.0783192	0.141214	0.0923092	0.131986	-0.24927	-0.279707	-0.152786	-0.0768127	-0.107179	-0.0892222	-0.19814	0.0584486	-0.0314746	-0.307204	-0.425406	0.147429
ALPHA_LINOLENIC_ACID_METABOLISM	0.156663	0.155698	0.353741	-0.134961	-0.256616	0.27877	-0.0812968	-0.0299036	0.00922332	-0.0331779	-0.322174	-0.369972	0.0198039	-0.289564	0.123105	-0.216461	0.0657058	0.268686	0.157808	0.389644	-0.00267087	-0.119579	0.214316	0.287991	0.433622	0.14708	0.330506	0.422434	-0.197071	0.0819505	0.237613	-0.152717	-0.237303	0.116709	-0.294391	-0.036275	0.328745	-0.121409	-0.0429799	-0.0967522	-0.338679	0.0408006	-0.0141694	-0.280614	-0.123914	-0.26553	-0.366796	-0.527155	0.270893
SPHINGOLIPID_METABOLISM	0.126304	-0.00566477	-0.221495	0.0515677	0.235802	-0.00238171	-0.189723	-0.228357	0.298227	-0.217126	0.0656791	-0.0166201	-0.20876	0.0149355	-0.154457	-0.198246	0.117768	-0.102231	0.192536	0.226162	-0.390064	-0.037281	-0.305074	-0.311871	0.263997	0.121002	-0.344196	0.108286	-0.179235	0.254765	0.142544	0.0187146	0.0510834	-0.0954134	-0.135403	-0.0443917	0.0110805	-0.187256	-0.204819	0.338743	-0.116457	0.108243	-0.0894141	0.14801	0.076342	-0.348608	-0.286759	-0.0876423	-0.0929391
GLYCOSPHINGOLIPID_BIOSYNTHESIS_LACTO_AND_NEOLACTO_SERIES	0.071207	0.212812	-0.0438007	-0.0863436	0.337771	-0.274934	-0.25435	-0.1379	0.250799	0.282469	0.451528	0.0952976	-0.0963789	-0.0283067	0.098178	0.151124	0.205272	-0.310443	-0.0392649	0.330473	-0.223813	0.183006	-0.169666	0.254638	0.519652	0.259138	-0.0041617	-0.32998	-0.164224	-0.116739	0.00257131	0.248782	-0.123912	0.0210818	-0.320037	-0.216945	0.366726	-0.148904	-0.049125	-0.359989	-0.214943	-0.224353	-0.231378	0.0216577	-0.354522	0.0160123	-0.195673	0.068282	-0.357447
GLYCOSPHINGOLIPID_BIOSYNTHESIS_GLOBO_SERIES	0.0738232	0.167223	-0.406526	0.103951	-0.0282075	0.0714526	0.203387	0.261082	0.045256	0.294706	0.183288	-0.345534	-0.331563	-0.104446	-0.448287	-0.115945	0.190128	-0.118061	-0.229185	-0.0512823	-0.113203	-0.141223	-0.191638	0.17259	0.172523	-0.479424	-0.16798	0.303485	-0.0204555	-0.323628	0.250095	-0.0284184	0.0782899	0.128596	-0.118856	-0.0477631	0.234727	0.391905	-0.315528	0.295049	0.156784	-0.24441	-0.309249	0.385808	-0.499337	-0.208302	-0.361461	-0.0185384	0.257656
GLYCOSPHINGOLIPID_BIOSYNTHESIS_GANGLIO_SERIES	0.077182	0.109257	-0.305973	0.107828	-0.0472394	-0.0455487	-0.0528704	0.024231	0.358504	-0.06086	0.0264908	0.0670409	-0.215839	-0.138403	0.0651028	0.258693	-0.00309405	-0.09949	0.284612	0.125552	-0.339702	-0.461953	-0.323435	0.26693	0.152407	-0.210245	0.0414061	0.349483	0.190434	-0.39489	0.133941	-0.398834	0.163243	-0.105129	-0.00658431	0.0924993	0.0578258	0.208809	0.282303	-0.16544	-0.094987	-0.160945	0.175167	0.357633	-0.575995	-0.302523	0.0266066	0.288362	-0.39651
PYRUVATE_METABOLISM	-0.128481	0.0519895	0.223899	-0.335941	-0.0336378	0.0918503	0.104739	0.233696	0.0364554	0.260084	-0.401342	-0.375611	-0.0723639	-0.144526	-0.32262	0.279546	0.0888156	0.257675	-0.244881	-0.0439564	0.1016	0.0386536	-0.106138	0.352728	0.26056	-0.503873	-0.00709342	0.130778	-0.120757	-0.372553	-0.126584	-0.299135	0.179509	-0.150153	-0.257628	0.268394	0.399309	0.145372	0.238453	0.00210249	0.230681	0.147543	0.238438	-0.0582125	-0.132912	-0.109979	-0.0140448	-0.0405982	-0.128307
GLYOXYLATE_AND_DICARBOXYLATE_METABOLISM	0.379676	0.172769	0.130531	-0.447691	-0.351349	-0.142317	-0.26105	0.538305	0.161443	-0.102079	-0.00699028	-0.193503	0.0797514	0.312727	-0.256008	0.30419	0.33841	-0.0585749	0.127724	0.0641287	-0.342428	-0.339434	-0.345612	0.258264	0.162456	-0.386646	-0.370777	0.167434	-0.032947	-0.341503	0.0131549	-0.107928	-0.124312	-0.250921	-0.113415	-0.132409	0.161082	0.0649398	0.333835	0.117252	-0.342168	0.190834	0.276254	0.143628	-0.207855	0.129626	-0.161617	-0.0152668	0.0158673
PROPANOATE_METABOLISM	0.151062	0.199392	0.172227	-0.471228	-0.0327495	-0.187385	0.158497	0.271044	0.026319	0.194372	-0.31644	-0.247122	-0.232916	-0.131796	-0.378138	0.0679857	0.120985	-0.025832	-0.399031	-0.118994	0.0867677	-0.193391	-0.133966	0.200867	0.479391	-0.400934	0.00123689	0.175954	-0.141334	-0.319606	0.0291502	-0.160156	0.302761	-0.111112	-0.123729	0.274445	0.316548	-0.166838	0.381812	-0.158121	0.264934	0.204113	0.285456	0.109347	-0.289407	-0.193397	0.100714	0.256066	-0.174874
BUTANOATE_METABOLISM	0.263075	0.358085	-0.0736083	-0.398647	0.0570267	0.0848947	-0.210697	-0.0655791	0.14475	0.330018	-0.246869	-0.258194	-0.0381406	-0.405643	-0.227634	0.199171	0.0845705	0.150998	-0.179558	0.208722	-0.0929658	0.0252362	-0.108514	0.132925	0.470753	-0.269861	-0.0505436	0.116788	-0.254052	-0.211569	0.0286891	-0.0981913	0.272285	-0.106773	-0.373077	-0.0285521	0.344793	0.067368	0.274457	-0.0822126	0.0558943	0.159467	-0.0523552	0.0539177	-0.292662	0.14491	-0.023791	-0.131615	0.0701853
ONE_CARBON_POOL_BY_FOLATE	0.158445	-0.255174	0.254	-0.417049	-0.483646	0.359552	-0.242309	0.290998	-0.0754405	-0.349974	-0.103554	0.00984541	-0.149635	0.567552	-0.137111	0.436358	0.054552	-0.340896	-0.348667	0.286726	-0.111458	-0.0123192	-0.182665	0.0206949	0.215231	-0.0410507	-0.435088	0.0556425	-0.115673	-0.0691553	0.497856	-0.110923	-0.185216	-0.354637	-0.0809342	0.499719	-0.19708	-0.163987	0.271038	-0.0819483	0.442601	0.608418	0.312717	0.345726	-0.157283	0.0652347	0.0943212	0.192043	-0.298234
RIBOFLAVIN_METABOLISM	0.338221	0.23627	-0.128413	-0.129046	0.239583	-0.43705	-0.413902	0.202243	0.58798	-0.384185	0.397465	-0.422649	0.284767	-0.341506	0.0493976	-0.444755	0.371315	0.195722	-0.134557	-0.106967	-0.30841	0.190159	-0.105896	0.277056	0.147413	-0.286169	0.307402	-0.304022	-0.0918055	0.095446	-0.185166	0.0142681	-0.111498	0.45613	-0.00132377	-0.285361	0.198077	0.181206	-0.113247	-0.0528114	-0.135526	-0.221964	-0.241137	0.30738	0.223638	-0.00477036	-0.0292714	-0.175943	0.169127
NICOTINATE_AND_NICOTINAMIDE_METABOLISM	0.298676	0.0164664	-0.37138	-0.0547409	0.0565913	-0.0385449	-0.281711	0.304418	0.404574	-0.161702	0.144972	-0.153461	0.160314	0.0172843	0.16043	0.341143	-0.140687	-0.277534	-0.269166	-0.0833364	-0.179116	0.0440863	0.160127	0.136831	0.229457	-0.275592	-0.164075	0.247596	-0.256285	-0.375984	-0.271942	-0.340319	0.375928	-0.16833	-0.0298103	-0.0587425	-0.0929229	-0.248377	0.0584931	0.131622	-0.0705061	-0.126543	0.00311951	0.353651	0.289368	-0.0416354	0.136989	-0.152134	-0.14028
PANTOTHENATE_AND_COA_BIOSYNTHESIS	0.372826	0.0486317	-0.412255	-0.141053	0.422012	0.0851013	-0.257695	0.0602098	0.451931	-0.304698	0.176357	0.103468	0.544124	0.472604	0.0798185	-0.0513077	0.10415	-0.506478	-0.292843	0.310826	-0.139579	-0.118611	0.24118	0.350911	0.179516	-0.467647	-0.277243	0.285581	-0.196323	-0.304658	0.128658	-0.318564	-0.0629529	-0.342586	0.240661	-0.387598	-0.0283486	0.00140109	-0.140052	0.138949	-0.316743	0.0841415	-0.169306	-0.321294	-0.00592028	-0.0161993	0.229356	0.0280553	-0.458103
FOLATE_BIOSYNTHESIS	-0.30086	0.170102	0.117819	0.236474	0.528575	0.362298	-0.172407	-0.164007	0.401907	-0.0679965	0.0288907	-0.190927	0.345886	0.120329	-0.131081	0.0865919	-0.213873	0.0137517	0.232926	-0.318657	0.163955	0.500662	0.184899	0.157766	0.329587	0.207624	-0.0703225	-0.420378	-0.468515	-0.0802474	-0.00309822	0.31891	-0.512752	-0.237264	-0.356099	-0.260514	0.29475	-0.182002	-0.407558	0.0348249	-0.334436	-0.269391	0.0191272	-0.216014	-0.0473278	-0.314932	0.044036	0.093379	-0.176391
RETINOL_METABOLISM	0.193422	-0.259154	-0.00434105	-0.255999	0.132833	-0.191935	-0.209642	-0.063559	0.349675	0.03541	0.03214	-0.168576	-0.160213	-0.0733142	-0.277298	-0.171354	0.310861	-0.0108154	-0.13752	0.0828015	0.127227	0.304479	0.0433392	0.133215	0.246252	0.0688749	-0.108101	0.244616	0.0662417	-0.0104962	0.173876	-0.1514	-0.0327662	-0.158585	0.00932624	-0.308987	0.21068	-0.158423	-0.312069	0.195128	-0.21777	0.128713	0.162934	-0.0970445	0.133534	0.146103	-0.0749786	-0.0874009	-0.165375
PORPHYRIN_AND_CHLOROPHYLL_METABOLISM	0.322632	-0.130697	-0.199972	-0.248626	-0.31926	0.0549699	0.178492	0.316224	-0.0489633	0.0791308	-0.138011	-0.29193	-0.408729	-0.200128	-0.098367	0.368849	0.14401	-0.255652	-0.056747	0.118241	0.0918123	-0.145835	-0.244051	0.248023	0.396461	-0.376535	-0.160451	0.27967	-0.203871	-0.187685	0.275458	-0.362155	0.102533	-0.216755	-0.136707	0.0236682	0.100065	-0.146756	0.124359	0.381156	-0.202739	0.289296	0.445465	0.22523	-0.279967	-0.104667	-0.162961	-0.20419	0.0436515
TERPENOID_BACKBONE_BIOSYNTHESIS	0.0487372	0.240431	0.604821	-0.152391	-0.513792	0.00785058	0.265899	-0.164768	-0.0352312	0.284954	-0.660579	-0.350097	-0.184244	-0.394718	0.239357	0.102235	0.0437513	0.235185	-0.161924	-0.374357	0.153123	-0.509963	0.261696	0.310338	0.624911	-0.628627	0.370119	0.531764	0.417422	0.14438	-0.38107	-0.626798	-0.0356551	0.197981	-0.142632	-0.145601	0.0871421	-0.00695856	0.313802	-0.114392	0.220471	-0.308227	-0.0438158	-0.295594	-0.0328851	0.668966	0.489478	-0.154677	0.19188
LIMONENE_AND_PINENE_DEGRADATION	0.372556	0.0590615	0.0284071	-0.77227	-0.125766	-0.350987	0.162318	-0.0610278	0.172383	-0.259958	-0.0638815	-0.326026	-0.385933	-0.133639	-0.276842	-0.163849	0.317729	-0.351429	-0.597212	-0.129142	0.366359	-0.268556	0.376811	-0.138599	0.547387	-0.339079	0.136821	0.14735	-0.232259	-0.302077	-0.118244	0.000433578	0.12771	-0.22481	0.159738	0.0625113	0.290743	-0.299419	0.518704	0.0608414	0.222298	0.423425	0.526207	0.0718343	-0.509651	0.358394	-0.340112	0.084711	-0.0399667
NITROGEN_METABOLISM	0.447868	0.0190083	-0.0502276	0.0109182	-0.163673	-0.0183457	-0.179641	0.350553	0.481949	0.128969	0.0749052	-0.198582	0.202209	-0.273584	-0.388263	0.249359	0.130453	-0.134644	-0.38409	0.0148783	-0.167266	0.0662279	-0.247565	0.105081	0.403905	0.085146	0.144344	0.0280045	-0.210292	-0.366084	-0.104503	-0.17908	-0.103212	-0.13319	0.180425	0.23869	-0.0852759	0.255696	0.0920892	0.091118	0.204436	-0.12574	0.137584	0.460923	0.175066	-0.214514	0.0997509	-0.317492	-0.0491601
SULFUR_METABOLISM	0.459594	-0.255367	-0.44902	-0.243126	0.349627	-0.0854233	0.478429	0.353556	0.453587	-0.491017	-0.259762	-0.083619	-0.396648	-0.110842	0.192585	0.236041	0.319795	-0.247029	-0.0128836	-0.475792	0.494798	-0.140121	0.29652	0.0798926	0.541473	0.0149914	0.0614855	0.516302	0.16717	-0.101885	0.015647	-0.407185	0.0734715	-0.105431	-0.0790875	-0.412117	-0.414439	0.192795	0.100055	0.355908	-0.192101	-0.0130232	0.418686	0.170784	-0.248391	-0.298705	-0.248321	0.1621	0.0912175
AMINOACYL_TRNA_BIOSYNTHESIS	0.0748874	-0.00327723	0.160828	-0.487199	-0.432678	0.196622	0.1683	0.507574	0.142966	-0.382483	0.265828	-0.0945844	-0.279035	0.0199641	0.193957	0.298892	-0.00206995	-0.390713	-0.479547	-0.238915	-0.232923	-0.309352	-0.556886	0.13361	0.207299	-0.312733	-0.164984	-0.437587	-0.160198	0.188244	0.0367539	-0.391939	-0.289472	-0.495991	0.16535	0.326656	0.00289409	0.248377	0.566694	0.493402	0.323738	0.529268	0.485609	0.471003	-0.122029	-0.0559246	-0.0569099	-0.345693	-0.275198
METABOLISM_OF_XENOBIOTICS_BY_CYTOCHROME_P450	0.124312	-0.0382476	0.0120728	-0.0547624	0.00335483	0.0239758	-0.144464	0.0238241	0.410044	0.146856	-0.270306	-0.273305	-0.3663	-0.20635	-0.321741	-0.120094	0.274159	-0.12581	-0.01084	0.158298	0.238035	0.448202	0.253339	0.231722	0.383497	0.15637	-0.102675	0.248072	0.0106754	-0.127252	0.0774146	-0.245323	-0.0765352	-0.0311388	-0.0330933	-0.288319	-0.0651566	-0.23828	-0.212417	0.0649379	-0.20651	-0.130519	-0.12463	-0.0325924	0.23525	0.0457614	-0.0165246	-0.0673084	0.0890059
DRUG_METABOLISM_CYTOCHROME_P450	0.130762	0.00507104	-0.00802582	-0.125458	0.100801	0.00148998	-0.156924	0.0729099	0.432969	0.15943	-0.184026	-0.210943	-0.389973	-0.324341	-0.299657	-0.149553	0.226398	-0.0832937	-0.112439	0.0777343	0.275172	0.428381	0.210136	0.18875	0.28544	0.292366	-0.0790657	0.277451	-0.101842	-0.12681	0.0312116	-0.139924	-0.0375044	-0.0951743	0.00852675	-0.293008	-0.00171418	-0.146394	-0.0879607	0.102603	-0.103452	-0.115212	-0.135069	-0.169122	0.116622	0.0816518	-0.151479	-0.0627496	0.0239398
DRUG_METABOLISM_OTHER_ENZYMES	0.144289	0.138107	-0.0600834	-0.354078	-0.212704	0.152412	-0.244825	0.241134	0.277538	-0.144521	0.0551701	0.0546627	-0.180233	0.0368415	-0.00897321	0.0779139	-0.0262185	-0.186776	0.291395	0.519866	-0.0434831	-0.0772361	0.073416	-0.0620686	0.212936	-0.0102342	-0.0479751	0.249077	0.0680468	-0.157826	0.350629	-0.252239	-0.281685	-0.129252	0.127499	-0.0994471	0.009204	-0.28733	-0.083498	-0.0104013	-0.319724	0.0295	0.0233574	0.190274	-0.106722	-0.107271	-0.0822942	0.0139539	-0.120023
BIOSYNTHESIS_OF_UNSATURATED_FATTY_ACIDS	0.20195	0.246618	0.375988	-0.329234	-0.339436	0.258721	0.203078	-0.192492	-0.23312	0.3633	-0.296312	-0.127987	0.0694469	-0.20431	0.163763	-0.138049	-0.200143	0.333699	-0.376022	0.0465937	-0.350665	0.116755	0.258143	-0.140464	0.286793	-0.610073	0.0143327	0.430896	-0.283443	0.29141	-0.173623	-0.188443	0.184386	-0.0159003	-0.0965019	-0.157094	0.189226	-0.0504789	0.295291	0.307297	0.0671464	0.176691	0.0482446	-0.306515	-0.502002	-0.450438	0.0106003	-0.118506	-0.0497999
ABC_TRANSPORTERS	0.11419	0.16097	-0.177545	-0.261947	-0.156418	0.253172	-0.188127	0.409895	0.0211861	-0.193497	-0.296271	0.151223	-0.1187	0.0638385	-0.144388	0.432742	0.0467767	0.050776	-0.336461	0.128723	0.111789	-0.111581	-0.412075	-0.204533	0.15088	-0.30772	-0.117439	-0.0483293	-0.112778	-0.0971071	-0.0828591	0.0575059	-0.0465813	-0.19879	-0.0709291	0.308787	-0.0904753	0.181271	0.268098	0.21729	0.110448	0.288624	-0.0445769	0.230104	0.131363	0.0140501	0.134693	0.0476054	-0.195736
RIBOSOME	0.118782	0.284494	-0.0749488	-0.341934	-0.441358	0.601458	0.128487	0.429947	-0.388814	-0.327071	0.297346	0.023082	-0.521759	0.0535294	0.330888	0.546685	0.245739	-0.134102	-0.407176	0.531901	0.138785	-0.361084	-0.0859367	-0.277847	-0.511621	0.0897302	0.00204618	-0.578611	0.0756212	0.0719161	-0.0940547	0.346475	-0.105032	-0.319938	0.337761	0.456953	-0.323351	-0.253949	0.458382	0.0545367	0.542291	0.424689	0.00586212	0.224633	-0.232942	0.249881	-0.580153	-0.169306	-0.386524
RNA_DEGRADATION	-0.126872	-0.247213	-0.0309577	-0.0467397	-0.247392	-0.0416009	0.22227	0.226875	-0.235278	-0.329989	-0.0506243	0.114751	-0.222021	-0.0359903	0.353882	-0.16651	0.16002	0.141149	-0.220269	-0.109785	0.143091	-0.0919484	0.322932	-0.175664	-0.432825	-0.0171898	0.0130529	-0.390824	0.27728	0.169145	0.0693528	-0.00899435	-0.0733158	-0.329949	0.227947	0.115654	0.0353717	-0.0319118	0.439056	-0.31969	0.239933	0.20933	0.24075	-0.0327216	0.0851581	0.00997918	-0.149763	0.107802	0.114403
RNA_POLYMERASE	-0.271787	0.0680314	0.427392	-0.459493	-0.497707	0.39168	0.200474	0.25093	-0.119913	-0.561305	-0.0845875	-0.0434716	-0.329601	0.246139	0.228728	-0.0350405	-0.277296	-0.143119	0.22027	0.337761	-0.101504	-0.0644628	-0.336905	0.115211	-0.34704	-0.0866515	-0.285977	-0.367045	-0.111967	0.271956	0.279689	-0.503491	0.0672368	0.00145584	0.306995	-0.00596754	0.288329	0.354456	0.266649	-0.0176415	-0.0271093	0.293438	0.111861	0.0378677	0.12765	0.00954346	-0.214508	-0.0231232	0.357554
BASAL_TRANSCRIPTION_FACTORS	-0.305585	-0.0664115	-0.0138632	-0.178773	-0.358482	0.219085	0.313412	-0.145191	-0.278823	-0.228626	-0.251484	-0.149703	0.0392761	-0.111386	0.155096	-0.0419469	-0.21862	0.1948	0.0829212	0.133539	-0.100935	0.157411	0.122114	-0.0535199	-0.382371	-0.0275126	0.299023	-0.197088	0.313536	-0.142312	0.160833	0.105931	0.2411	0.254083	0.360186	-0.00640879	-0.0760254	0.0409008	0.130891	0.0316321	0.313195	0.275711	0.0819866	-0.261927	0.0281089	0.00804024	-0.0683152	-0.0998045	0.250672
DNA_REPLICATION	-0.10675	-0.095572	0.312025	0.0749039	0.166725	0.319463	-0.406761	0.0206706	-0.656414	0.0191305	-0.0839434	0.241198	0.267532	0.23311	0.0729262	0.0741193	-0.203138	0.352189	0.470293	0.424398	0.547136	0.293565	-0.107032	0.328121	-0.523517	0.222216	0.0401928	-0.386039	0.178701	0.252787	-0.0804025	0.421378	0.0025046	0.102055	-0.272756	0.330035	0.488212	0.469508	0.490369	-0.551737	-0.260575	-0.281178	-0.115424	-0.676317	-0.0223118	-0.28537	-0.505198	0.394395	0.0232458
SPLICEOSOME	-0.111583	-0.0185672	0.233251	0.0246561	-0.431761	0.273753	0.108694	-0.261682	-0.375144	-0.333046	-0.215234	0.448195	-0.40499	0.370863	0.312907	-0.171648	0.0639522	0.0864628	0.137962	0.201924	0.120413	-0.169469	0.355172	-0.219044	-0.416517	0.0964935	0.338011	-0.443093	0.259571	0.286116	0.243984	0.201155	0.216276	-0.0043195	0.193092	0.188184	0.215354	0.0197723	0.250864	-0.391468	0.248524	0.0927707	-0.322616	-0.525103	0.309866	0.215021	-0.151687	0.12826	0.285021
PROTEASOME	-0.367935	0.31248	0.157153	-0.325713	-0.389835	-0.0495045	0.103709	-0.150607	0.361083	-0.269899	-0.527864	0.138838	-0.425967	0.376203	0.0799294	-0.183968	0.239244	-0.336067	0.0162294	-0.0674514	0.0488898	-0.13404	0.311241	-0.489484	0.387997	-0.149013	-0.0197442	-0.0749061	-0.137172	0.0517975	0.432185	-0.505624	0.472096	-0.0898243	0.0661203	0.0580368	0.32352	-0.203861	0.0373772	-0.0229985	-0.19256	0.00696831	0.0838506	-0.0663299	0.0536339	-0.202918	-0.107939	0.0782281	0.481291
PROTEIN_EXPORT	-0.252256	-0.0573003	-0.492825	-0.224174	0.2302	-0.226925	0.164627	-0.0977472	0.524966	0.0228158	0.284135	-0.184651	-0.492542	-0.196906	0.200713	-0.229969	-0.0501933	0.0985003	-0.523263	-0.145112	-0.443461	0.138179	-0.00373418	0.383808	0.239398	-0.252284	0.00563554	0.369942	0.0127112	-0.256522	-0.320557	-0.314256	-0.278708	-0.14214	0.632983	0.223905	-0.213114	0.0367497	0.110987	-0.39993	0.21685	0.250997	-0.301482	0.390482	-0.032863	-0.311659	0.182026	-0.496276	0.0857734
PPAR_SIGNALING_PATHWAY	0.0880216	0.116427	-0.13472	0.0204041	0.0923949	-0.0537605	-0.129422	-0.0184221	0.224197	0.231604	-0.111824	0.00897475	0.0628498	0.0347513	-0.0423719	-0.150865	0.16957	-0.255556	0.175939	-0.211728	0.0368746	0.311943	0.032133	0.113874	0.380785	-0.130068	-0.0832865	0.319396	-0.225572	-0.189167	0.0683134	-0.351552	0.0271541	-0.00347706	0.0110887	-0.0557863	0.194324	-0.120319	-0.0271512	-0.0587888	-0.104118	0.0480071	-0.155079	0.0424524	-0.345174	0.0524249	0.112001	0.0194221	-0.130408
BASE_EXCISION_REPAIR	0.18382	-0.280745	0.0240382	-0.0262279	-0.0397658	0.180026	-0.0392217	-0.130539	-0.489548	0.228935	-0.174851	0.2352	0.0165132	0.101778	0.156948	-0.112081	-0.110397	0.226612	0.351466	0.414104	0.0245624	0.167098	-0.0668146	0.096058	-0.278803	0.171499	-0.0505945	-0.148597	0.0401635	0.205614	0.354999	0.124143	-0.153162	0.160587	-0.443182	0.311623	0.190471	0.153965	0.293254	-0.177513	-0.137122	0.00860963	-0.0817923	-0.399426	0.278094	-0.304818	-0.346365	0.117618	0.119904
NUCLEOTIDE_EXCISION_REPAIR	-0.0151233	-0.270037	0.0784621	0.24262	0.120224	0.230606	-0.142211	-0.0206625	-0.503855	0.0229572	-0.205841	0.00654947	0.120933	0.122455	-0.188449	-0.234125	-0.0238765	0.224379	0.0112857	0.143056	0.415768	0.0728333	-0.0215709	0.0335141	-0.50587	-0.0826638	0.0766639	-0.275674	0.384537	-0.00579634	0.0227866	0.196189	-0.0579401	0.0379911	-0.0939738	0.277836	0.153854	0.349254	0.280151	-0.265544	-0.0124044	0.166175	-0.0953292	-0.435633	0.0446171	-0.176731	-0.331694	0.24584	0.109941
MISMATCH_REPAIR	-0.0788322	-0.162393	0.203383	0.172312	0.231363	0.0703341	-0.419864	0.065146	-0.572608	0.250981	0.00611883	0.0338154	0.274349	0.302901	0.0738254	-0.201912	-0.280418	0.353368	0.364268	0.22141	0.413107	0.24965	0.147344	0.378872	-0.559285	0.129718	-0.18633	-0.40867	0.462277	-0.169405	-0.0424254	0.362184	0.303697	0.233932	-0.369406	0.202172	0.26323	0.163837	0.403135	-0.120664	-0.335801	-0.231292	-0.252933	-0.529316	0.00631474	-0.257355	-0.320878	0.320453	0.313537
HOMOLOGOUS_RECOMBINATION	-0.10468	-0.39141	-0.211083	0.0100093	-0.425734	0.0627591	-0.0656789	0.233274	-0.652336	-0.0815343	-0.215373	0.440086	0.456465	0.366572	0.304768	0.104381	-0.0796133	0.393717	0.199792	0.22208	0.428972	-0.159003	0.265072	-0.156907	-0.353408	-0.281023	-0.335223	-0.18525	0.398019	0.105042	0.380746	0.156423	0.0508888	-0.00151866	-0.503513	0.122701	0.171592	0.469366	0.367727	-0.107487	-0.189059	0.11348	0.349167	-0.506528	-0.2571	-0.190259	-0.271043	0.473906	-0.375069
NON_HOMOLOGOUS_END_JOINING	-0.0268853	-0.0423859	0.604919	0.181086	-0.455343	0.18574	0.439196	0.308321	-0.04454	-0.459471	-0.419322	-0.296155	0.12306	-0.27364	0.100058	0.48768	-0.158205	-0.328282	-0.488029	-0.25383	0.239313	-0.0465938	0.146795	0.392024	-0.479563	-0.0113197	0.295524	-0.349583	0.398724	-0.0546733	-0.247915	-0.345864	-0.161592	0.59048	-0.177636	-0.292633	-0.180072	-0.0848539	0.337553	0.188548	-0.229117	-0.0733346	0.204516	0.25221	-0.155936	-0.333514	-0.131173	-0.283957	0.58421
MAPK_SIGNALING_PATHWAY	0.00401827	0.0987956	0.0216514	0.0428747	0.0435138	-0.00668168	-0.0134633	-0.00598347	0.0455096	0.0167626	-0.0386988	-0.0104604	0.00777093	-0.0290267	0.101438	0.0246377	-0.0326117	-0.00841666	-0.011934	0.0197213	0.154569	0.0299951	0.17746	0.0155377	-0.00525694	0.0670149	-0.0724495	0.134959	-0.0979593	-0.126993	-0.0307035	0.0489846	-0.046615	-0.0367224	0.156108	-0.0529438	-0.114161	-0.0403085	-0.160835	0.00358547	-0.0640738	-0.0389816	-0.131829	0.0343489	-0.112913	-0.0508254	-0.118847	0.0542517	-0.0854469
ERBB_SIGNALING_PATHWAY	-0.234068	0.144401	0.0205569	0.00599605	0.008126	-0.0595045	0.0284945	-0.13357	-0.0649107	0.201949	0.000803839	-0.0503994	0.0341535	0.107381	0.16321	-0.0229652	0.203316	-0.00018611	0.129624	0.194652	0.117603	-0.0200756	0.132827	-0.0659293	-0.055578	0.0876348	0.244731	-0.0575336	0.00483679	-0.10805	0.0815702	0.142041	-0.0132412	0.00411975	0.147772	-0.139095	-0.0389518	0.0980245	-0.205132	-0.193396	-0.107573	-0.243374	-0.200259	-0.11624	-0.0816732	0.159349	-0.112743	0.132805	-0.275444
CALCIUM_SIGNALING_PATHWAY	-0.0236385	0.14996	-0.0182624	0.0999285	0.120218	0.0803533	-0.164892	0.0898591	-0.0225874	0.0541208	-0.114229	0.0909852	0.0641818	0.27945	-0.0892914	0.196316	-0.0671661	-0.00649424	-0.0288849	-0.0317534	0.0877304	0.0751008	-0.0501366	0.0849226	0.0398695	0.0481027	-0.113719	0.0919693	-0.214729	-0.0826871	-0.0258502	0.0397846	-0.0110991	-0.0720911	0.0360889	0.147034	-0.0556929	0.0502453	-0.0290131	-0.179516	-0.00571379	-0.205952	-0.0349998	0.0363121	-0.166067	0.0172316	0.211764	0.148698	-0.204153
CYTOKINE_CYTOKINE_RECEPTOR_INTERACTION	0.279482	-0.0514518	-0.124066	-0.0587894	0.128455	-0.124299	-0.213106	0.163995	0.261042	0.158452	-0.0515988	-0.0452556	-0.0427506	-0.00373167	-0.0291547	0.107964	0.206653	-0.128817	-0.116778	0.118003	0.0476053	-0.0687273	-0.230949	0.0863208	0.123119	-0.0512744	-0.0418947	0.207544	-0.0598994	-0.104581	0.0957778	-0.244112	-0.210453	0.0197356	0.128453	-0.198843	0.0400071	-0.0295458	-0.068169	0.0351266	-0.0826837	0.247949	0.108201	0.176615	-0.0744409	0.102032	-0.243922	-0.0254515	-0.0587533
CHEMOKINE_SIGNALING_PATHWAY	0.125653	0.0486887	-0.0352603	0.073157	0.226786	-0.0515236	0.0542057	-0.00969494	0.0346194	0.155924	0.0102679	-0.061501	0.0518642	-0.00657431	0.0257074	0.0124043	0.180723	-0.0860708	0.0133756	0.0840632	0.0401498	0.0341529	-0.00672606	0.151926	-0.118837	0.0644091	-0.0171536	0.114961	-0.177398	-0.233671	0.0508726	0.0170051	0.0505136	-0.0426177	0.101867	0.0196155	0.0558199	-0.0743312	0.0778967	-0.0236537	-0.0733964	0.0938869	-0.0180147	0.103912	-0.0821804	-0.013831	-0.108779	0.0748159	0.0480116
PHOSPHATIDYLINOSITOL_SIGNALING_SYSTEM	-0.122645	-0.129267	0.139967	0.0116232	0.119026	0.0382121	-0.139345	-0.170009	0.0111245	-0.017603	-0.0815728	-0.0908944	0.170598	0.174426	-0.111804	-0.139135	0.0815664	-0.0764597	0.078691	-0.0344952	0.0935998	0.00605378	0.0939377	0.22555	-0.0367355	0.0806717	-0.0310646	0.0417323	-0.151725	-0.0319351	0.169762	0.106439	-0.0115086	0.110068	-0.00206242	-0.126756	0.27159	0.103925	-0.28854	-0.129119	-0.159738	-0.130167	-0.155286	0.0995017	-0.0648799	-0.123864	0.125078	0.0266361	0.0566303
NEUROACTIVE_LIGAND_RECEPTOR_INTERACTION	-0.0336324	0.197726	0.0128067	0.040484	0.043645	0.15985	-0.181687	0.133531	-0.0939159	0.199501	0.0473311	0.197551	0.166706	0.145711	-0.0433751	0.0718552	-0.0766211	0.0327956	0.0524455	0.105265	0.00605607	0.00347712	0.0264292	0.0231429	0.0743593	0.0300555	-0.170807	0.0422522	-0.154106	-0.138493	-0.176812	-0.0334838	0.0347812	-0.170212	0.0464438	0.0753481	-0.00861094	0.107017	0.143162	-0.0780146	0.078026	-0.0233482	0.00988812	0.139326	-0.293837	-0.0589361	-0.0318681	0.0237975	-0.16511
CELL_CYCLE	-0.158006	0.150209	0.0559909	0.253859	0.137896	0.203535	-0.181852	-0.0772111	-0.313907	-0.209381	-0.16736	0.18277	0.203045	0.228058	0.0140384	-0.137743	0.0724838	0.142261	0.115661	0.246568	0.272724	0.00870638	0.352463	0.11716	-0.294069	0.0426453	0.272695	-0.193835	0.0877171	-0.0359112	-0.187987	-0.00958863	-0.0993937	0.0448797	-0.118656	0.0271901	-0.0195106	0.159156	-0.0225279	-0.443108	-0.12909	-0.0346337	-0.0751896	-0.445627	0.264954	0.084671	-0.254484	0.0923969	0.223122
OOCYTE_MEIOSIS	-0.181835	-0.0661244	0.0444489	0.268994	0.215518	0.188268	-0.0648524	-0.281161	-0.185741	-0.094044	-0.234556	0.181915	0.128223	0.143846	-0.165115	-0.00441958	0.133914	0.0457654	-0.00506402	-0.132226	0.166601	0.0569383	0.169845	0.193542	-0.0214164	0.204387	-0.0944918	-0.0869909	0.0668906	0.00725922	-0.0633921	0.216933	-0.00414991	0.0995601	-0.163453	-0.0685157	0.0194953	0.156537	-0.00994735	-0.349585	-0.0803687	-0.209453	0.0221199	-0.246099	-0.00350694	-0.244746	0.154224	0.177685	0.188629
P53_SIGNALING_PATHWAY	0.12675	-0.0175746	-0.198421	0.110792	0.172276	-0.11071	-0.200396	0.0873063	-0.0673951	0.0602024	-0.201675	0.0318043	0.152702	0.125496	-0.0840198	0.0483163	0.24662	-0.291534	0.0277269	0.20672	0.289157	0.0711087	0.181386	0.263041	-0.146052	0.102333	0.130182	0.0792011	-0.0943506	-0.241553	-0.0483135	-0.184516	-0.303847	-0.0313417	0.0561859	-0.311188	-0.0476059	0.198782	-0.235786	-0.0952014	-0.143551	0.175179	-0.0832309	-0.211012	0.0805558	0.0554114	0.0629851	-0.221674	0.272013
UBIQUITIN_MEDIATED_PROTEOLYSIS	-0.0554611	-0.232662	0.0079195	0.144543	-0.0800383	-0.075482	0.170168	-0.286065	-0.269443	-0.152039	0.114234	0.0459834	-0.0208026	-0.0483844	0.0838083	-0.281841	0.134808	0.190233	-0.130703	-0.0322102	0.102625	0.00607282	0.0953832	0.00659107	-0.332811	0.0401048	0.327044	-0.00878513	0.270775	0.0646478	0.124966	0.149105	0.0139761	-0.208968	-0.0106314	0.00106741	0.0258596	0.0377965	-0.120681	-0.16905	0.0279382	0.125646	-0.0251486	-0.241993	0.00151519	-0.0878886	0.0145309	-0.170908	0.250977
SNARE_INTERACTIONS_IN_VESICULAR_TRANSPORT	0.128789	-0.0986841	-0.158911	-0.0467677	-0.177962	-0.368642	0.191773	-0.0529843	0.452467	-0.0021627	0.216065	-0.00970764	-0.000682036	-0.15388	-0.160142	-0.352099	0.194634	-0.0109802	0.226951	-0.12663	-0.126315	0.0245664	-0.158044	0.199525	0.11173	-0.0300907	-0.0797372	0.206192	-0.0580832	-0.197089	-0.0930537	-0.293875	0.0124328	0.196816	0.0742873	-0.296033	-0.127335	-0.173271	-0.132512	0.293386	-0.268694	-0.159854	0.201853	0.00145178	-0.177031	0.0755204	0.331987	-0.268523	0.230607
REGULATION_OF_AUTOPHAGY	0.012508	0.0735496	-0.0896401	-0.217458	0.31294	0.0325966	-0.241781	0.170113	0.315255	0.0851297	0.0652146	0.241937	0.0654129	-0.061218	0.183356	-0.100944	-0.0202151	-0.274645	-0.0390158	-0.135031	-0.23344	-0.206651	0.126678	0.0384456	0.0924043	-0.365605	0.307685	-0.0857457	0.140401	0.151639	0.149131	-0.454414	-0.0810764	0.198459	0.230345	-0.328915	0.0707155	-0.11293	-0.0273362	-0.291181	-0.0756615	-0.312733	-0.243758	0.163466	0.211414	-0.0757117	0.0430718	0.165288	-0.099423
LYSOSOME	0.29366	-0.102997	-0.281255	0.0108295	0.0542881	-0.203765	0.276065	-0.101308	0.341661	-0.208843	-0.180862	-0.252023	-0.151408	-0.202047	-0.0401179	0.0455557	-0.026691	-0.117953	0.141241	0.135404	-0.0478906	-0.115082	-0.236405	-0.2724	0.354526	-0.0131698	-0.0682433	0.468293	-0.339291	-0.229042	-0.12326	-0.207894	-0.0915556	-0.101623	0.04956	-0.196138	-0.291432	-0.0813418	-0.193562	0.334635	-0.217036	-0.0545796	0.374523	0.260986	-0.214094	0.0521687	-0.0682074	-0.227989	0.109804
ENDOCYTOSIS	-0.0769488	-0.00443084	0.153141	0.127857	0.0903326	-0.026971	0.197174	-0.10065	0.128322	0.0132828	-0.183465	-0.223081	0.0867813	-0.0157263	0.057767	0.0409633	0.119446	-0.224548	0.0145596	-0.186459	0.010031	0.0867456	0.0288517	0.100232	0.0655335	-0.0540055	-0.0221015	0.0653581	-0.178735	-0.179757	0.0108991	-0.0780555	-0.00398212	-0.0450096	0.0216153	-0.0170007	0.10287	-0.209963	-0.164902	0.0466851	-0.0654469	-0.058919	0.0940686	0.0862891	-0.0682639	-0.0415868	0.0795983	-0.114146	-0.00825665
PEROXISOME	0.128658	-0.0198804	-0.015793	-0.424031	0.00326032	-0.0291964	0.21961	0.307756	0.329314	-0.264355	-0.24151	-0.308094	-0.148963	-0.340824	-0.0854049	-0.028899	0.326758	0.00845796	-0.0808587	-0.0611867	-0.00879049	-0.161149	-0.227401	-0.310135	0.322406	-0.414052	-0.275022	0.274835	-0.103734	-0.192088	0.131314	-0.386455	0.0563027	0.0920809	-0.159431	-0.0616711	0.181227	-0.0890822	0.178269	0.31835	-0.134486	0.00994633	0.325063	0.274394	0.0215317	0.165284	0.12907	0.0170532	-0.00689341
MTOR_SIGNALING_PATHWAY	0.103757	0.196706	0.024975	0.0157448	0.048194	-0.0205922	0.130002	0.0567472	-0.0661451	0.0793792	0.267471	0.0488304	0.13567	-0.0157413	-0.0912334	0.141015	-0.0365219	0.0809306	-0.271642	-0.313361	0.0728327	-0.10147	-0.000435685	-0.233946	-0.195038	0.114522	-0.0643788	-0.130066	-0.0191616	-0.212764	0.0602722	0.224991	-0.0599513	-0.218889	0.0663726	0.0160664	0.0500036	0.169323	-0.1407	-0.0696214	-0.0134842	-0.199749	-0.183577	0.0395408	0.213715	0.073344	-0.233287	0.0154023	-0.0727042
APOPTOSIS	0.199493	-0.35182	-0.0917012	0.013879	0.0635973	-0.133301	0.123653	0.0512533	0.174783	0.00748424	-0.12503	-0.188032	0.130265	-0.0326871	-0.181827	0.0591667	0.355902	-0.121155	-0.00492453	-0.0944491	0.115321	-0.0951338	-0.139246	0.109264	-0.0177918	0.00287574	0.0851725	0.338113	-0.160164	-0.199256	0.113089	-0.269473	-0.0953555	-0.129461	-0.0700072	-0.366006	0.0750922	-0.0871628	-0.330697	0.177204	-0.146656	0.163206	0.0697765	-0.039819	0.0848491	-0.128713	0.0672122	-0.0554928	0.0655005
CARDIAC_MUSCLE_CONTRACTION	-0.138106	0.114436	-0.0826223	-0.0649596	0.109108	0.13397	0.065968	0.118928	-0.0472043	-0.194818	-0.0799234	0.00196293	-0.212887	0.313815	0.0729961	0.371337	-0.102965	-0.0848075	-0.0531737	-0.107309	0.29386	-0.0133893	0.00652148	0.00292614	0.112746	-0.115901	-0.0316955	-0.160731	0.100219	-0.151612	-0.212494	0.191892	0.037554	0.0616435	-0.241582	0.213477	0.032094	-0.00543061	0.0440787	-0.386294	0.225512	-0.0260122	-0.132176	-0.1293	-0.195359	0.167293	0.0430779	0.0585627	0.00186016
VASCULAR_SMOOTH_MUSCLE_CONTRACTION	0.0749544	-0.0266968	0.0360263	0.168744	0.162001	0.0207788	-0.0586418	-0.00130773	-0.124582	0.0726812	0.0380657	0.00347798	0.0543022	-0.0592144	-0.189697	0.0579707	0.123238	0.0106205	0.050649	0.0292797	0.143712	-0.0348621	0.0482546	0.252081	0.0706006	0.181539	-0.0141345	0.338733	-0.243612	-0.0574831	0.0963497	0.184165	-0.0673095	0.0704274	-0.0104919	0.0688482	0.142781	0.0884474	-0.136979	-0.164552	-0.0820212	-0.12773	-0.128056	-0.179118	-0.212894	-0.134098	-0.102806	-0.0370469	-0.0925095
WNT_SIGNALING_PATHWAY	-0.143514	-0.0362207	0.091992	0.0856997	0.0107596	-0.0226852	0.2063	0.0667233	-0.141827	-0.023697	-0.0499636	0.112559	-0.0847448	0.0827073	0.172994	-0.112513	0.146114	0.200871	0.0270781	0.0675101	0.111764	0.0370316	0.17737	0.0141529	-0.218145	0.130052	0.125701	-0.0391037	-0.0242828	-0.0546905	-0.125301	0.228871	-0.0489774	0.0181963	-0.0374541	-0.00433491	-0.16553	-0.105381	0.0142152	0.0971811	0.0220801	-0.00462937	0.00705049	-0.127001	-0.116921	-0.0657374	-0.0436384	0.018594	-0.117202
DORSO_VENTRAL_AXIS_FORMATION	0.146492	0.214668	0.0692671	0.362597	0.184844	-0.182397	-0.0972005	-0.284066	0.0463412	0.419798	0.221489	-0.0307855	-0.294586	-0.384633	-0.0960286	-0.214606	0.139771	0.052257	0.0802536	-0.44343	-0.000413986	0.195589	0.191717	0.298509	0.122672	0.137989	-0.0127936	0.132378	-0.180588	0.253102	-0.0395611	0.435237	-0.294451	0.0300339	-0.252471	-0.107012	-0.157338	-0.111835	-0.138343	-0.0998971	-0.185859	-0.300953	-0.210524	0.20279	0.0105468	-0.23725	-0.160161	-0.0263805	-0.169204
NOTCH_SIGNALING_PATHWAY	0.131732	0.0685374	0.104403	-0.00476894	-0.141673	-0.0952153	0.138408	-0.21934	-0.162053	0.216953	-0.228822	0.0359639	0.0541435	-0.0141922	0.27197	-0.0956806	-0.011453	-0.149064	0.00519355	0.0142343	-0.10067	-0.206805	-0.270134	-0.122253	0.0545277	0.134008	0.0890399	0.122384	-0.210546	-0.217209	0.172083	0.160845	0.13387	0.104705	-0.216151	-0.118442	0.0192928	-0.210038	0.129918	0.265947	-0.155142	0.192191	0.138009	0.181172	-0.0285404	0.0971676	-0.20422	-0.0599722	0.171816
HEDGEHOG_SIGNALING_PATHWAY	-0.264747	-0.178156	0.0531088	0.18336	-0.241998	-0.0322798	0.339399	0.248499	-0.0771533	-0.0444895	0.187663	-0.00658451	-0.0343828	0.267607	0.154917	0.215754	0.275726	-0.173997	0.151679	0.0461129	0.31232	-0.134556	-0.0702552	-0.277091	-0.127261	0.074698	0.0108654	0.0198626	0.0206095	-0.291648	0.0269417	0.0384225	0.0432262	0.159433	0.000208508	-0.0892851	-0.344018	0.252398	-0.0569645	0.141113	-0.092352	0.142108	0.108278	-0.0210387	-0.0702973	0.121078	-0.119314	0.0722331	-0.357714
TGF_BETA_SIGNALING_PATHWAY	0.0489838	-0.13483	-0.0434238	0.26417	0.0248985	-0.0237524	-0.0525132	0.150616	0.00056567	-0.210184	0.102596	0.359134	0.0204973	-0.0421064	0.043218	-0.12313	0.119429	0.0647781	-0.110887	0.0703099	0.300449	-0.0432744	0.0379158	-0.0171526	-0.251087	0.217666	0.372187	-0.0835075	0.179287	-0.139479	-0.0988323	0.1121	-0.150079	0.114439	0.189676	0.0714785	-0.217149	0.177396	-0.172792	0.142674	0.223397	0.0739515	-0.175006	-0.107671	-0.0526535	-0.0835376	-0.237109	0.056913	-0.0960468
AXON_GUIDANCE	-0.0368942	0.190556	0.0530987	0.0420647	-0.0125981	-0.125883	0.117679	-0.189099	-0.120138	0.250642	0.0178742	0.141946	0.305685	0.0977672	0.0936135	-0.0896241	0.119667	0.0803631	0.120011	0.0321055	0.281758	0.181167	0.100371	-0.0346624	-0.199315	-0.166191	0.0176974	0.0145945	-0.0791612	-0.207418	-0.0594007	0.167159	0.0559657	0.188189	0.0241501	-0.171682	0.108085	0.0396874	-0.0744173	-0.0712902	-0.108718	-0.275333	0.00275773	0.115384	-0.0617924	-0.112341	-0.0393025	0.174013	0.00255134
VEGF_SIGNALING_PATHWAY	-0.0124669	0.0928613	0.0999366	-0.0437944	0.124009	0.0391109	0.0592435	-0.139641	-0.161284	0.166413	0.0337955	-0.238099	0.162032	0.0611946	0.221738	-0.140811	0.0987646	0.115406	0.144108	0.0991809	0.193588	0.0218775	0.100226	0.0569341	-0.0549562	0.0437243	-0.00516232	0.179165	0.0173934	-0.0595528	0.162796	0.0677606	-0.112442	-0.156606	-0.0261253	-0.205413	0.0752552	0.026943	-0.155753	-0.134997	-0.0885304	0.074677	-0.125656	-0.120873	0.00630493	-0.0252006	-0.0879286	-0.13891	0.0607508
FOCAL_ADHESION	0.124375	0.0787399	-0.0537766	0.0185183	0.042119	-0.0791509	0.163202	0.0698087	0.20546	0.186888	-0.10511	-0.0936286	-0.0911233	0.0144202	-0.120179	-0.117294	0.185238	-0.233612	-0.0537715	-0.0732788	0.20506	0.0413677	-0.086374	0.0866375	0.0513207	0.0692176	0.119613	0.399611	-0.2287	-0.152284	0.114899	-0.0266777	0.0373277	-0.0350537	0.10008	0.0237284	-0.0878405	0.0302053	-0.182439	0.129282	0.039456	-0.00687296	0.0693699	-0.00877625	-0.210065	0.0649231	-0.0717547	0.0425868	-0.169887
ECM_RECEPTOR_INTERACTION	0.263616	-0.0254895	-0.0763134	-0.112272	-0.000769836	-0.194522	0.0843595	0.123745	0.360929	0.188277	-0.144894	-0.0328408	-0.207698	-0.0261721	-0.166513	0.052644	0.358221	-0.406999	-0.0956987	-0.0422595	0.273702	0.00398162	-0.156919	0.0891439	0.163214	-0.055863	0.088433	0.448233	-0.226521	-0.156922	-0.0528887	0.01832	0.0644	0.0349749	0.159363	0.050033	-0.0134392	-0.0706362	-0.0461908	0.297669	0.0824861	-0.00650503	0.147111	0.0136875	-0.316863	0.25693	-0.107891	0.0508298	-0.16191
CELL_ADHESION_MOLECULES_CAMS	0.159419	0.115182	-0.0599663	0.0530641	0.25518	-0.0101176	-0.293552	-0.00444691	0.335913	0.25726	-0.0902367	-0.0137785	-0.0513737	0.00651531	-0.155817	0.132339	-0.016897	-0.158206	0.1043	-0.0925672	0.111594	0.035439	-0.0247877	-0.0928461	0.0866084	0.0523144	0.110648	0.105946	-0.0921777	-0.0264965	0.0161222	0.229774	-0.0625129	-0.031306	-0.0330052	-0.0600692	0.0393191	-0.123157	-0.042774	0.0752757	-0.0714718	-0.0107151	0.171148	0.0631059	-0.273959	-0.187063	0.0164929	-0.0512698	0.00910687
ADHERENS_JUNCTION	0.0256705	0.070527	0.0916569	0.175418	0.0471632	-0.118799	0.112135	-0.0764641	-0.236582	-0.15486	0.130061	0.0190449	-0.0692597	0.118497	0.0227481	-0.212673	0.146387	-0.0230331	-0.172401	-0.100683	0.0960244	0.243781	-0.0332177	0.0650275	-0.282505	0.173328	0.206243	3.27e-05	-0.209265	-0.117952	-0.168107	0.247898	-0.184542	-0.0275518	0.157923	-0.0515638	-0.119672	-0.113355	-0.133161	0.147783	0.117105	0.0387598	0.132152	-0.0850258	-0.106604	0.0786868	-0.251623	-0.0663515	-0.143238
TIGHT_JUNCTION	0.0366156	0.177647	0.0587256	0.147092	0.016041	-0.0152134	0.203393	-0.119432	-0.0128011	0.2434	0.0200943	-0.0929362	-0.0581251	-0.0582609	-0.0645125	-0.184298	0.0275397	-0.0983053	-0.0277175	0.0306106	0.0023354	0.0714681	-0.0455461	0.105726	0.0543579	0.0126829	0.225362	0.078651	-0.231708	0.0519743	-0.0311038	0.173664	-0.070425	0.148524	-0.10743	-0.00245999	0.048937	-0.0972164	-0.0454557	0.0725159	0.134038	-0.0448581	0.101947	-0.146987	-0.115465	-0.0719526	-0.253631	-0.0901782	-0.0657395
GAP_JUNCTION	-0.23161	0.0879235	0.170326	0.249823	0.182969	-0.0619812	-0.062032	-0.127636	-0.0134877	0.10894	0.0560331	0.0687522	0.224422	0.172699	-0.0869892	-0.107257	0.082346	-0.129901	-0.000534722	0.0105716	0.0848637	0.188632	0.0911761	0.118644	-0.0345104	0.105366	0.0452479	0.237848	-0.185302	-0.188418	0.0113283	0.0388347	0.127204	0.131803	0.176469	-0.0214594	-0.18783	0.110123	-0.216204	-0.107076	-0.0586255	-0.297726	0.0522228	-0.12031	-0.154594	-0.242485	0.120982	0.0447056	-0.0346453
COMPLEMENT_AND_COAGULATION_CASCADES	0.372774	-0.221324	-0.166483	-0.127551	0.149933	-0.0979283	-0.15138	0.169296	0.452277	-0.100639	-0.174286	-0.33144	-0.230167	-0.192342	-0.281517	-0.0956518	0.18572	-0.0846973	0.0368981	-0.281642	0.0177027	0.384685	-0.0611565	-0.080929	0.307815	0.0382	0.116144	0.38651	-0.0779905	-0.0958521	-0.121735	-0.0812929	-0.17594	-0.00398169	-0.0572262	0.0242574	-0.0332805	-0.195772	-0.125736	0.00791204	-0.0942691	-0.025071	0.141945	0.487692	-0.0923335	0.000585013	-0.242298	-0.121807	0.195124
ANTIGEN_PROCESSING_AND_PRESENTATION	0.160122	-0.208848	-0.170764	-0.208879	0.200665	0.199755	0.0621029	0.205599	0.448272	0.0716742	-0.373831	-0.120664	-0.309781	-0.0433216	-0.194506	0.266464	0.285133	-0.0312558	-0.000650919	-0.176794	-0.135171	-0.306707	-0.0253498	-0.251829	0.368128	-0.325732	-0.0365343	0.412254	-0.28642	-0.00955023	0.0592075	-0.174759	-0.000916382	-0.137942	0.108753	-0.220768	0.283612	-0.0139842	-0.143789	0.144706	-0.284119	0.26022	0.25575	0.262724	-0.214597	-0.186491	0.124551	0.158277	-0.244445
RENIN_ANGIOTENSIN_SYSTEM	0.267606	-0.169856	-0.0625441	-0.21422	-0.456863	0.0830773	0.00265828	0.156683	0.154838	0.00385286	-0.104449	0.175601	0.0731928	0.0287183	-0.278278	0.151508	-0.110581	-0.03213	0.190896	0.011634	-0.325309	-0.131379	-0.454492	-0.260033	0.362433	-0.0687617	-0.376145	0.294621	-0.24686	-0.144473	0.417088	-0.285545	0.248649	0.344555	-0.0310606	-0.441365	0.0864285	0.426928	0.177366	0.510119	-0.451474	-0.10952	0.159426	0.187422	0.197157	0.350096	-0.223973	-0.0338051	0.145107
TOLL_LIKE_RECEPTOR_SIGNALING_PATHWAY	0.0683519	-0.0443046	-0.129025	0.02428	0.313443	-0.0769802	-0.0827209	-0.0723696	0.259032	0.10466	-0.125851	-0.275648	0.0576387	-0.197857	-0.0799354	-0.14717	0.288769	-0.13271	0.161921	0.0850398	-0.173453	-0.240881	-0.146284	-0.186162	0.0694523	-0.0454731	-0.148289	0.24712	-0.183297	0.0355239	0.100771	-0.244628	0.116938	-0.126604	0.0862591	-0.380875	-0.0104653	0.101747	-0.207232	0.102339	-0.332611	0.0537856	-0.0298007	0.215173	-0.137524	0.0380133	-0.0509201	-0.018593	-0.106154
NOD_LIKE_RECEPTOR_SIGNALING_PATHWAY	0.0888048	-0.175707	-0.101993	-0.0852019	0.195177	-0.105432	0.0947582	-0.211225	0.378152	0.262895	-0.163879	-0.157888	0.0731605	-0.193224	-0.0929816	-0.245247	0.242417	-0.166676	0.123138	0.2161	0.0373553	0.0754129	-0.13246	0.0170503	-0.0930617	-0.00499464	0.00856627	0.15562	-0.0171839	-0.137429	-0.0188716	-0.0637993	0.109219	-0.123151	0.108832	-0.331418	0.0457341	0.111644	-0.252331	0.129458	-0.242797	0.221772	-0.0338797	0.270955	-0.0158677	-0.0633229	0.00450073	-0.171206	0.0761437
RIG_I_LIKE_RECEPTOR_SIGNALING_PATHWAY	0.146508	-0.085327	-0.18021	-0.0521383	0.162081	-0.0490442	-0.0548514	0.0589971	0.232604	0.0590062	-0.15328	-0.2825	0.178087	-0.212976	-0.0774058	-0.12551	0.263187	-0.203617	-0.0441773	0.161379	-0.0939347	-0.274188	-0.0814522	-0.0140347	0.0624992	-0.232641	0.0789492	0.306592	-0.0397764	-0.1798	0.0799819	-0.325348	0.0580032	0.0703888	0.0794463	-0.404607	-0.0494646	0.139353	-0.287629	0.146605	-0.191039	0.237344	0.0320021	0.267527	-0.0347927	-0.0741609	0.131837	-0.201917	-0.0900742
CYTOSOLIC_DNA_SENSING_PATHWAY	0.356132	-0.220807	-0.192125	-0.0328053	0.0567714	0.0780941	0.125936	0.303442	0.300969	-0.151883	-0.17438	-0.226254	0.110989	-0.0157412	-0.0576945	-0.0259794	0.240239	-0.124398	0.100923	0.0784691	-0.0629934	-0.347585	-0.305047	0.0293939	0.213329	-0.198865	0.0707921	0.301358	-0.162565	-0.0412389	0.029967	-0.475121	-0.0793883	0.179574	0.392733	-0.439694	0.013261	0.124696	-0.2532	-0.151272	-0.171179	0.106419	-0.154876	0.018579	0.0294496	-0.169873	-0.0512905	0.00958042	0.15623
JAK_STAT_SIGNALING_PATHWAY	0.0498449	0.108098	-0.0890044	0.108108	0.0772073	-0.133857	-0.154572	0.141815	-0.0125404	0.0688615	-0.092922	-0.0392942	-0.0450437	0.165702	-0.0865347	0.00595932	0.114196	-0.118533	0.0126216	0.158066	-0.0379672	-0.0927582	-0.0836347	0.0268925	0.0181729	0.0580686	-0.0134815	0.257604	-0.0386922	-0.108855	-0.0161967	-0.144185	-0.121515	0.0157811	0.267349	-0.188132	-0.0801096	0.00329299	-0.234297	0.0531535	0.0579447	0.012268	0.0353779	0.145543	-0.0367679	0.0590645	-0.190211	0.0505504	-0.124741
HEMATOPOIETIC_CELL_LINEAGE	0.133063	0.15291	-0.0923455	0.0404998	0.0438207	-0.0887833	-0.154182	0.144047	0.29667	0.0477754	-0.101014	-0.232477	-0.222704	0.13278	-0.0679352	0.101433	0.200678	-0.268037	-0.0104261	0.036311	0.0491661	-0.0483921	-0.178481	-0.101433	0.198519	0.00606375	-0.0369268	0.356222	-0.0900193	-0.0332946	0.069321	-0.104851	-0.316354	-0.0405332	0.154544	-0.0165569	0.028074	-0.142021	-0.16234	-0.0369112	0.0105278	0.198995	0.182319	0.070055	-0.299005	0.126491	-0.165385	-0.0322835	-0.10338
NATURAL_KILLER_CELL_MEDIATED_CYTOTOXICITY	0.230442	-0.139083	-0.0243019	-0.0329501	0.182365	-0.0884603	-0.106367	0.0038435	0.0665714	0.149394	-0.0425006	-0.224204	-0.154089	0.00821935	-0.105285	-0.0322559	0.251839	0.0520001	-0.00608334	-0.0680854	0.0742319	-0.059897	-0.0316386	0.111064	0.077449	0.0531942	0.0798161	0.225551	-0.0879549	-0.163186	0.0283627	-0.125593	-0.144258	-0.0281257	0.148618	-0.37717	0.104746	0.0574515	-0.194925	0.0930925	-0.10056	-0.149391	-0.0207777	0.13767	0.00132026	-0.162949	0.120085	0.163965	-0.108348
T_CELL_RECEPTOR_SIGNALING_PATHWAY	-0.00465272	0.00275499	-0.00463105	0.1152	0.20703	-0.0143426	-0.0545214	-0.0791145	0.0157571	0.199723	0.0467773	0.00726972	0.00793655	-0.0196464	0.0537193	-0.189062	0.0658314	-0.0312139	0.175682	0.0649384	0.198073	0.074197	0.149494	0.132352	-0.166298	0.246393	0.0469989	0.0852873	0.0763783	-0.206583	0.0712494	0.0883746	-0.148599	-0.0209118	0.0459966	-0.336206	-0.0446535	-0.00286424	-0.333675	-0.118528	-0.0883525	-0.163796	-0.255543	-0.088908	0.112681	-0.0498499	-0.00234092	-0.0555491	0.0711754
B_CELL_RECEPTOR_SIGNALING_PATHWAY	0.0560126	-0.0483583	0.028562	0.0830077	0.394205	-0.271231	-0.0126131	-0.150241	-0.00754692	0.212633	0.0610045	-0.0513151	0.116159	-0.0364086	-0.0349298	-0.0987142	0.140151	0.0480187	0.146163	0.044658	0.173571	0.16103	0.1197	0.102698	-0.0116263	0.244149	-0.0490416	0.0146754	-0.18022	-0.160154	0.166595	-0.0546604	-0.177668	-0.194568	0.113678	-0.249112	-0.00515198	-0.0732314	-0.370064	-0.11484	-0.201417	0.0641147	-0.26191	-0.0168551	0.0263375	0.081477	0.154548	-0.0167499	0.0626313
FC_EPSILON_RI_SIGNALING_PATHWAY	-0.0745808	0.0778453	0.21659	0.0460789	0.186032	0.0123529	-0.150467	0.0133278	-0.185021	0.226081	0.0470099	-0.16094	-0.0296437	-0.0807905	0.152682	-0.0744092	0.08687	0.216082	0.0713871	0.0787441	0.0720352	0.0144265	0.0200868	0.133911	-0.050454	0.177979	-0.0263851	0.0110438	-0.0109785	-0.238352	0.0776469	0.0453622	-0.0915557	0.0945367	-0.0242299	-0.17134	0.0805091	0.155396	-0.107871	-0.207849	-0.157489	-0.108456	-0.18927	-0.114567	-0.0291069	-0.0927128	-0.165049	-0.0124567	0.0018192
FC_GAMMA_R_MEDIATED_PHAGOCYTOSIS	0.0380042	0.0811777	0.109302	0.159252	0.246195	-0.124603	0.0775644	-0.0360246	-0.0622668	0.0951811	0.0401454	0.0114557	0.0317963	-0.0171806	-0.128885	-0.1276	0.211952	0.0830151	0.0836071	-0.124884	0.2586	-0.00820881	0.0971096	0.0624377	-0.13605	0.00618921	0.0579298	0.149389	-0.143304	-0.223331	0.0878386	0.103714	-0.15557	-0.079004	0.0370539	-0.171544	0.123112	0.148701	-0.172986	0.0307608	0.045837	-0.0373651	-0.1774	-0.149924	-0.0795475	-0.00370831	-0.243978	0.100021	-0.0551963
LEUKOCYTE_TRANSENDOTHELIAL_MIGRATION	0.189405	0.257771	0.0343963	0.0935802	0.110588	0.00574125	0.121574	-0.107927	0.00748031	0.205273	-0.120297	-0.158146	0.0197667	-0.0237792	-0.215628	-0.193176	0.077408	-0.0542784	-0.124236	0.0230979	0.105081	-0.0200245	-0.0782826	0.0757422	0.0403135	0.0354738	0.0773482	0.293464	-0.21994	-0.133019	0.077439	0.0241202	-0.164893	-0.055905	-0.00823501	-0.0116039	-0.00669015	0.114402	-0.126578	0.13161	0.0429366	-0.0164627	0.0247642	0.0204604	-0.0809442	0.0197146	-0.108453	-0.0284976	-0.0465219
INTESTINAL_IMMUNE_NETWORK_FOR_IGA_PRODUCTION	0.181875	-0.0245721	-0.245187	-0.0258737	0.163137	0.170372	-0.254777	0.169235	0.396548	0.327494	-0.122286	0.201178	0.0146635	0.181302	-0.184237	0.148755	0.0638946	-0.216353	-0.0263186	0.0462906	-0.142793	-0.257242	-0.276389	0.0327941	0.142325	0.137967	-0.29756	0.175147	-0.128923	-0.00491397	0.236149	-0.339991	-0.170671	-0.0710153	-0.139978	-0.238248	0.0901745	-0.270664	0.154891	0.0180446	-0.298512	0.358307	0.263044	0.0164113	-0.160267	-0.178278	-0.174341	-0.104939	0.139516
CIRCADIAN_RHYTHM_MAMMAL	0.137649	-0.0830214	0.294061	0.384314	0.54604	0.0913689	0.159755	-0.311334	-0.103252	0.418691	0.0453436	-0.298735	0.567149	-0.182473	-0.370422	0.269082	-0.00217028	0.0844189	-0.115243	-0.389679	0.213258	0.377817	0.390195	-0.370602	-0.357432	0.0835857	-0.29443	0.267029	-0.211529	-0.522726	0.0200838	-0.169331	-0.469011	-0.425707	0.478543	-0.150132	-0.0379867	-0.324407	-0.273752	0.226143	0.0595016	-0.36455	-0.140302	0.374961	0.0576032	-0.134469	0.665532	-0.541553	-0.0693627
LONG_TERM_POTENTIATION	0.0689555	0.0963803	-0.0528659	0.156532	0.222765	-0.086082	-0.0907544	-0.257275	-0.106429	0.119599	0.192547	0.080636	0.237734	0.180911	-0.0750251	-0.0895131	0.0903592	0.0546414	0.0380819	-0.103988	0.175452	0.254662	0.045234	0.288416	0.119049	0.0780953	-0.0437943	-0.177801	-0.288782	0.0546466	0.0630925	0.177939	0.0383436	-0.0403613	0.125309	-0.0690967	-0.0393441	0.172679	-0.0640201	-0.277419	-0.157379	-0.338083	-0.155741	-0.0892564	-0.162525	-0.277978	0.0660945	-0.033463	-0.0510671
NEUROTROPHIN_SIGNALING_PATHWAY	-0.00746255	-0.0467086	-0.0948392	0.237875	0.127721	0.0063702	-0.103536	-0.288718	-0.0887774	0.0902733	0.12899	-0.0374768	0.165644	0.0463731	0.0960603	-0.122468	0.0973208	-0.150265	0.201221	-0.0648647	0.148662	-0.0133454	-0.00668998	0.122284	-0.0620317	0.195406	0.0876702	0.0616804	0.0229958	-0.0994974	0.0351965	-0.0105254	0.0282573	0.00964329	0.058055	-0.245183	-0.0580888	0.0610271	-0.259468	-0.12146	-0.153251	-0.149638	-0.288049	0.0580825	-0.0158805	-0.0181935	0.135202	0.170656	0.0594434
LONG_TERM_DEPRESSION	-0.217	0.205	0.0805808	0.146352	0.146335	0.0134266	-0.0345025	-0.021096	-0.0813833	0.0519231	0.11503	0.0614315	0.229797	-0.0363329	0.00610419	0.00557535	-0.0888372	0.0397597	0.165963	0.075728	0.0786343	0.0458208	0.0726947	0.0210307	0.0460984	0.0767303	0.0571912	0.0788488	-0.236652	-0.100706	0.114097	-0.0165989	0.0176101	0.139457	0.121997	0.0160298	0.0118615	0.257098	-0.037938	-0.250493	-0.0286527	-0.212151	-0.153183	0.0049376	-0.15568	-0.385555	-0.111136	-0.144338	0.0331713
OLFACTORY_TRANSDUCTION	-0.185306	0.0786907	-0.0459069	0.000504471	0.17353	-0.0743828	-0.239233	0.00792881	-0.158438	-0.0436327	0.0618065	-0.0207019	-0.252936	-0.107908	-0.081671	-0.0456799	-0.0996003	-0.0266731	0.00390609	0.0166184	-0.0609018	-0.149543	0.12421	-0.0774536	0.0889799	0.00979377	-0.0503707	0.172739	-0.117171	-0.0790728	0.104163	-0.0213734	0.0819808	-0.0961976	-0.0488417	-0.042379	0.00626302	0.0256684	0.188143	0.0731251	0.0609406	0.115854	0.105853	-0.119006	-0.259719	0.0195983	-0.0126485	0.217954	-0.0839275
TASTE_TRANSDUCTION	0.0188548	-0.0948244	0.0784712	0.290773	0.349241	-0.136358	-0.280205	-0.265321	-0.140587	0.145978	0.0657712	-0.0643626	0.14215	0.104987	0.0175522	-0.0911185	-0.139431	-0.0339595	-0.0331679	0.00600942	-0.0723232	-0.106786	0.178381	0.341167	-0.115958	0.284388	0.0240876	-0.0911547	0.220499	4.97e-07	0.178421	0.343992	-0.0950783	0.0610691	0.095352	0.00436947	0.191737	0.0794825	-0.0641536	-0.442854	0.0290895	-0.404015	0.0774662	-0.0177146	0.0292018	-0.180842	0.252724	0.141103	-0.154344
REGULATION_OF_ACTIN_CYTOSKELETON	-0.0167172	0.165399	-0.00353433	0.124454	0.194299	-0.115501	0.19612	-0.0596294	0.00807841	0.115011	-0.0565829	-0.14255	0.0566744	0.00145747	-0.168802	-0.104288	0.0665477	-0.166465	-0.000528263	-0.175195	0.184635	0.0203996	0.0871177	-0.0335448	-0.0741144	0.115079	0.0690734	0.289092	-0.242163	-0.160559	0.113157	0.0289095	-0.0128537	-0.0716982	0.0444515	-0.0321021	-0.036791	-0.0402031	-0.201013	0.180202	-0.0541378	0.0161812	0.135795	-0.00307376	-0.123579	0.0577924	-0.158354	0.0345346	-0.198361
INSULIN_SIGNALING_PATHWAY	-0.0602755	0.100843	0.00163763	0.101427	-0.0712663	-0.0143852	0.111023	-0.146828	-0.176092	0.17977	-0.0544458	0.0526902	0.139072	-0.0652613	-0.139105	0.111716	-0.0061438	-0.0954799	0.0893215	-0.113265	0.0985764	0.0621426	-0.0321265	-0.102557	0.0142515	0.123409	0.0781799	0.0339435	-0.166653	-0.0746061	0.000525938	0.0466053	-0.0313057	-0.076119	0.0882313	-0.0358181	0.0285545	-0.0917883	-0.0416695	-0.100068	-0.028799	0.0357964	-0.130941	0.108963	-0.0599319	-0.110517	-0.0728511	0.0156119	0.00595319
GNRH_SIGNALING_PATHWAY	-0.0230014	0.0430839	0.201953	0.150396	0.241694	0.0484379	-0.255169	-0.0833589	-0.0860549	0.160164	0.00338487	-0.0963603	0.156512	0.0445399	0.0266443	0.0716977	0.0873149	-0.0550722	0.0609582	0.0354242	0.0936758	-0.0499718	0.154115	0.268974	0.128895	0.223749	-0.00954061	0.071469	-0.110206	-0.132493	0.00287652	0.16379	-0.10578	0.0691241	-0.0067068	-0.0887018	-0.0137664	-0.0030861	-0.136681	-0.231624	-0.170477	-0.147514	-0.109053	0.0521022	-0.14744	-0.114763	-0.0153791	-0.0308659	-0.0978183
PROGESTERONE_MEDIATED_OOCYTE_MATURATION	-0.181701	-0.0959727	-0.0852882	0.0327015	0.216554	0.0672604	0.0422366	-0.273778	-0.183287	-0.020584	-0.125331	0.0930733	0.0983736	-0.0706772	-0.0197711	0.148279	0.0395291	0.00452927	0.0470505	0.0111688	-0.00264477	-0.00860636	0.0981932	0.106076	-0.111208	0.140683	-0.154893	-0.0248234	0.0277924	-0.0937219	0.125546	0.176866	-0.0276785	-0.0867061	-0.288668	-0.125347	0.118239	0.260184	0.0862771	-0.303871	-0.152238	-0.0978588	0.0594075	-0.154878	0.286987	-0.0122654	0.133814	0.10262	0.0461338
MELANOGENESIS	-0.0251126	-0.0803245	-0.025133	0.155391	0.0807461	-0.137438	0.0360209	-0.00716592	-0.165339	0.164437	0.0534466	-0.0147181	0.140464	0.125427	0.0580637	-0.106985	0.195017	-0.0609884	0.0174914	-0.0529452	0.230418	0.0247444	0.0636728	0.132504	-0.0423889	0.118406	0.00944492	0.17691	-0.23887	-0.146592	-0.0311253	0.156102	-0.047257	0.260248	0.00821164	-0.14482	-0.0493673	0.0495569	-0.0296229	-0.0773364	-0.105446	-0.0830211	-0.0988884	-0.083966	-0.140279	-0.0645768	-0.0514304	0.0371896	-0.257728
ADIPOCYTOKINE_SIGNALING_PATHWAY	0.103699	-0.103821	-0.198943	0.206528	0.259615	-0.0830921	-0.0510582	-0.128405	0.270507	0.252164	-0.224068	-0.150588	0.251626	-0.00989203	0.0540572	0.123776	0.153962	0.0184088	0.0762814	-0.215479	0.0214029	-0.00531891	-0.155211	-0.165822	0.164854	-0.023196	0.00917084	0.199723	-0.290143	-0.24056	-0.0342824	-0.201255	-0.0453856	0.0804677	0.0184442	-0.179532	-0.0776264	0.00530816	0.0309014	0.0557561	0.0225726	0.0846234	-0.279621	0.216521	-0.11267	-0.0787707	0.01476	-0.0253361	-0.000439715
TYPE_II_DIABETES_MELLITUS	0.167768	0.111958	-0.0900911	0.240354	0.26204	-0.0474132	-0.025327	-0.307973	-0.101641	0.323179	-0.390962	-0.183158	0.177927	-0.20171	-0.0934126	0.215394	-0.0308218	0.303103	-0.00573884	0.0112744	0.0359839	-0.0496118	-0.264573	-0.0407276	-0.0370163	0.0322266	-0.170939	-0.106385	0.114893	-0.179594	-0.108966	0.184047	-0.0152463	0.159407	0.103877	0.0935647	-0.0731758	0.29736	0.0661999	-0.203407	-0.283713	-0.0880403	-0.317904	0.189692	0.0130463	-0.0241977	0.0772094	0.263511	-0.000677036
TYPE_I_DIABETES_MELLITUS	0.219579	-0.0545908	-0.159667	0.0226974	0.277026	0.142399	-0.374761	0.153162	0.552659	0.318404	-0.133863	0.0950295	-0.260565	-0.111656	-0.181695	0.382629	0.300463	-0.165337	0.153838	-0.191868	-0.0948583	-0.12805	-0.0743747	-0.223816	0.268939	0.107859	-0.187621	0.12217	-0.302693	0.061807	-0.0463683	-0.150222	-0.0233027	-0.315235	0.153225	-0.282929	0.398927	-0.0966048	-0.0619537	0.0428005	-0.354578	0.05507	-0.0294601	0.130346	-0.276466	-0.202071	0.326562	-0.0559814	-0.0724302
MATURITY_ONSET_DIABETES_OF_THE_YOUNG	0.348919	-0.161415	-0.19984	0.239597	0.147664	-0.159744	-0.199102	-0.208951	0.214845	0.308858	0.116833	-0.193828	0.142233	-4.29e-05	-0.0960825	-0.163745	0.175027	0.0629166	0.0883216	0.119432	-0.211518	0.201796	-0.181753	0.372979	0.43695	0.140697	-0.390438	-0.311936	0.141841	0.0248321	-0.208681	-0.300356	-0.442304	-0.110835	0.000930121	-0.184518	0.196181	0.396365	-0.157837	0.0534214	-0.194499	0.121826	-0.0867242	0.151314	0.227771	-0.183262	-0.0937832	0.107033	-0.181745
ALDOSTERONE_REGULATED_SODIUM_REABSORPTION	0.0348589	0.195761	-0.0386201	0.0861216	0.379747	0.0605201	-0.0730272	-0.297458	-0.121109	0.228897	0.231646	-0.137176	-0.250097	-0.175621	0.00479423	0.00184799	0.117899	-0.0833318	0.0781607	0.0241736	0.134618	0.0110262	-0.0716561	0.107446	0.0958798	-0.192096	-0.0719744	-0.0401739	-0.118581	-0.147151	-0.0422617	0.266844	-0.0731857	-0.193719	0.0751202	-0.0198268	-0.208418	0.265403	0.0576713	-0.178056	-0.088933	-0.203388	-0.332496	0.224251	-0.00546792	-0.167922	-0.175161	0.147444	0.0457271
VASOPRESSIN_REGULATED_WATER_REABSORPTION	-0.0739476	-0.0892897	-0.0407926	0.0995746	-0.105534	0.0684684	0.0649874	-0.198412	-0.0392854	-0.30031	0.248591	0.043188	0.00338874	0.0639563	0.188777	-0.07332	0.00889007	-0.254953	-0.0823069	0.0472545	0.00214125	-0.0551218	-0.0114279	0.205649	-0.0881471	-0.0227347	0.137387	0.186927	0.0921989	-0.122962	-0.053504	0.0303636	-0.0623205	0.18925	0.153739	0.0712385	0.0221494	-0.0959548	-0.301997	-0.258993	-0.160181	-0.00192015	0.0785288	0.0918212	-0.247411	0.201207	0.111473	0.0523195	-0.110183
PROXIMAL_TUBULE_BICARBONATE_RECLAMATION	0.168194	0.291283	0.0728743	0.0647388	0.113176	0.218532	-0.119351	0.315666	0.0263567	-0.0639466	-0.0261867	-0.102228	0.269028	0.410512	-0.124238	0.35451	0.338294	-0.120231	-0.0699401	-0.208279	0.0842763	0.160436	-0.299787	0.0593513	0.244858	-0.442852	-0.105786	-0.116264	-0.316089	-0.224328	0.00197395	0.0618636	0.246884	-0.193293	-0.150163	0.100645	-0.111704	-0.184651	0.386904	-0.309435	0.0750191	-0.171685	-0.0411407	0.083006	-0.353823	-0.164228	-0.111302	-0.157936	0.0374374
ALZHEIMERS_DISEASE	-0.166799	-0.0497752	-0.172431	-0.0511968	0.190742	-0.116634	0.070319	-0.0604805	0.179065	0.0164664	-0.110852	-0.0659171	-0.165796	0.278837	0.000677194	0.140493	0.316389	-0.12746	0.0928723	-0.270151	0.175637	0.0581695	-0.00336285	-0.053538	0.281578	-0.0847347	-0.172	-0.0295954	-0.041644	0.0243947	0.0308203	-0.100744	0.136101	0.0139331	-0.0418293	-0.196133	0.263804	0.142166	-0.20568	-0.282341	-0.110312	-0.264917	0.0127975	-0.0255633	-0.110372	0.0174106	0.17435	0.160331	0.237522
PARKINSONS_DISEASE	-0.0633569	0.00965907	-0.134969	-0.238036	0.17518	0.0844239	0.168772	-0.0475403	0.2087	-0.165743	-0.294536	-0.109556	-0.25951	0.281521	-0.0101719	0.33669	0.370945	0.00874888	-0.0200439	-0.188887	0.18369	0.163226	0.0314414	-0.252106	0.19255	-0.271296	-0.264263	-0.23675	0.00112285	-0.0546407	0.18472	-0.203549	0.192122	-0.0703046	-0.193003	-0.0914938	0.19633	0.190943	-0.0753141	-0.322166	0.0259513	-0.287998	0.249098	-0.0862616	-0.0604008	0.0894629	0.378684	0.115755	0.304998
AMYOTROPHIC_LATERAL_SCLEROSIS_ALS	-0.0702675	-0.0375792	0.0296413	-0.246144	0.0754876	0.0176272	-0.0556901	-0.170214	-0.056935	0.256389	-0.0767767	-0.0942695	-0.0115787	0.199958	0.145965	-0.153062	0.127228	-0.262717	0.200929	-0.221504	0.321901	0.1416	-0.212325	0.0285231	0.143956	0.155629	-0.21863	0.0286773	-0.152283	0.0932637	-0.0109119	-0.268524	0.145111	-0.0748025	0.0662293	-0.125887	0.209329	0.0266825	-0.0525354	-0.239928	-0.258964	-0.0280057	-0.174259	0.207188	0.0674203	-0.149696	0.0795277	0.0446835	0.0039515
HUNTINGTONS_DISEASE	-0.175281	0.0217894	0.0197226	-0.0248167	0.0381844	0.120118	0.093361	-0.0733301	0.0954013	-0.219164	-0.252516	-0.0311405	-0.21193	0.204413	0.125365	0.10031	0.252843	-0.0744386	0.00977033	-0.0834464	0.096725	0.104417	0.0233068	-0.121997	0.0568497	-0.0384811	-0.110745	-0.18425	0.0335024	-0.0430929	0.0166575	-0.1728	0.0878426	0.0123787	-0.081808	-0.0186438	0.172637	0.236632	-0.0972386	-0.21183	-0.0485365	-0.191255	0.0450243	-0.146304	-0.0221194	0.0426202	0.0604947	0.0427417	0.32685
PRION_DISEASES	-0.215506	0.310705	0.0295479	0.244226	0.132803	0.119746	-0.0245974	-0.232397	0.154498	-0.341045	0.0652666	-0.085858	-0.0548292	-0.181819	-0.353133	0.0228564	0.0932296	-0.183452	0.236727	-0.359591	0.0894993	0.354202	-0.161346	-0.215181	-0.015058	0.0755035	-0.0654582	0.328059	-0.33749	-0.146706	-0.100465	-0.065523	-0.192288	0.265507	0.309842	0.0528407	-0.0515648	0.0182238	0.125555	-0.192211	-0.0612289	-0.0189124	0.0524198	-0.0455162	-0.31957	-0.132614	-0.0929389	0.0215831	0.00290451
VIBRIO_CHOLERAE_INFECTION	-0.049093	-0.0895231	0.142108	0.168093	0.109366	-0.140507	0.103769	-0.307964	0.139457	0.17081	0.188707	-0.0790522	-0.0356854	-0.0301811	-0.12043	-0.147156	0.0333285	0.0822098	0.207481	-0.344226	-0.134654	0.240318	0.0637694	0.297384	0.0206198	-0.0166059	0.0550715	0.35931	-0.265039	-0.0236206	-0.0303037	0.111246	0.0354579	-0.103755	0.0955618	-0.0753687	0.00406109	0.105498	-0.191356	-0.181962	-0.194567	-0.218296	0.28054	0.0292164	0.022252	-0.0881869	0.135412	-0.199813	0.011059
EPITHELIAL_CELL_SIGNALING_IN_HELICOBACTER_PYLORI_INFECTION	0.192216	-0.258871	0.0713292	0.106111	0.146101	-0.182394	0.0733933	-0.319239	0.283639	0.127502	-0.111607	-0.351731	0.088236	-0.197207	0.0597197	-0.166617	0.16389	0.0910185	-0.05879	-0.167066	-0.0750424	0.121914	-0.113929	-0.0180421	0.105868	0.113634	0.0466574	0.16772	0.0232648	-0.114525	0.0311354	-0.0444115	0.0746475	-0.0894704	0.113979	-0.364842	-0.0379369	-0.0734258	-0.302186	0.125036	-0.312531	-0.318692	0.192695	0.174823	0.0313731	-0.00625511	0.100964	-0.140006	0.109297
PATHOGENIC_ESCHERICHIA_COLI_INFECTION	0.138531	0.336387	-0.0880821	0.371381	0.318682	-0.242699	-0.076269	-0.344061	0.114994	0.251372	0.0419102	0.0582405	-0.0830241	-0.0537428	-0.31428	-0.346618	0.0699169	-0.226219	-0.070167	-0.17555	0.114633	0.31243	0.310524	0.302063	-0.14476	0.153231	0.235656	0.319473	-0.37496	0.029874	-0.145805	0.193893	-0.00384221	0.188483	-0.138097	-0.144316	-0.0180133	0.0583488	-0.447432	-0.234878	-0.0342287	-0.394894	-0.0307625	-0.0565379	-0.10402	0.0844471	0.011214	0.117048	0.0995278
LEISHMANIA_INFECTION	0.13825	0.010603	-0.0562438	-0.164449	0.256736	0.0814253	-0.174189	0.0474612	0.383906	0.0825142	0.106281	-0.0794138	-0.101933	-0.287953	-0.233925	-0.0190088	0.339006	-0.163578	0.183631	0.0470734	0.163898	-0.16091	-0.208555	-0.253624	-0.0898442	-0.11738	-0.0712596	0.222547	-0.160201	-0.0709148	0.175429	-0.318796	0.103006	-0.164651	0.0206228	-0.31368	0.118465	0.0951773	-0.0625071	0.223213	-0.172273	0.256469	0.103762	0.219038	-0.026971	-0.0707622	0.00358167	-0.044907	-0.00333768
PATHWAYS_IN_CANCER	0.0638458	-0.0257662	-0.0615582	0.0785278	0.0613747	-0.0363983	0.0872511	0.0647608	0.017642	0.114247	-0.0710393	-0.0108808	0.0688495	0.00995823	0.0699345	-0.112406	0.270985	-0.141321	-0.00434114	0.069657	0.193171	-0.00179607	-0.0372975	-0.0758386	-0.0132255	0.102173	0.114492	0.22498	-0.122537	-0.224048	0.0495539	0.0163069	-0.119407	0.0281662	0.0558935	-0.0997622	-0.143788	0.0162307	-0.161537	0.0925057	-0.0389872	0.0293395	-0.0393085	0.00452575	-0.0365514	0.0882377	-0.193263	-0.00828588	-0.0867708
COLORECTAL_CANCER	-0.0382114	-0.111857	-0.123464	0.165869	0.2491	-0.121983	0.123597	-0.0767756	-0.228425	0.0975077	0.0152689	-0.0472597	0.0176977	-0.1825	0.319331	-0.0172415	0.103252	0.16279	0.0669945	0.113898	0.220128	-0.029159	-0.148414	0.130599	-0.343552	0.0948371	0.0879846	0.112822	-0.000417974	-0.182851	-0.0992735	0.0613397	0.0385558	-0.00162784	-0.128372	-0.113704	-0.150521	0.0272165	-0.0153583	0.0566221	-0.13155	-0.0243064	-0.134114	0.0129882	0.122325	-0.00404345	-0.204264	0.0852341	-0.0410369
RENAL_CELL_CARCINOMA	-0.0819011	0.0616473	-0.0410816	0.0676331	0.0487369	-0.103714	0.0394857	-0.0554651	-0.204187	0.221438	-0.0621957	0.0591003	0.138034	0.0160481	0.0228958	-0.037585	0.157869	0.218464	-0.0482558	-0.0316704	0.164491	-0.0469581	-0.0686145	-0.146986	-0.129578	0.0231018	-0.0310122	0.247572	-0.137604	-0.120286	0.229093	-0.0223365	-0.0581377	-0.0796041	0.0604883	0.0610476	-0.0260935	0.171156	-0.186328	-0.150889	-0.103826	-0.103268	-0.209498	0.00407968	-0.0343393	0.145659	-0.294485	0.213499	-0.142095
PANCREATIC_CANCER	0.0443526	-0.0100097	-0.0399489	0.0113133	0.142953	0.154741	0.122312	0.0430981	0.0141006	0.0463959	-0.0620726	-0.0658315	0.218506	-0.0544098	0.0268532	-0.0563942	0.113161	-0.00442348	-0.0722311	-0.00529336	0.146635	-0.0101575	-0.159616	-0.218291	-0.2177	0.130891	0.107015	0.308111	-0.0774363	-0.262093	0.0492982	-0.02418	-0.0567935	-0.0871931	0.0594444	-0.195667	-0.0735753	0.0608178	-0.174551	0.120184	-0.0940184	-0.163668	-0.114718	0.0308324	0.132242	0.120811	-0.251408	0.14972	-0.170522
ENDOMETRIAL_CANCER	-0.161283	0.0517535	0.00110432	0.143775	0.126058	-0.195184	0.229856	-0.0436605	-0.276886	0.172974	0.016118	-0.0470945	-0.0399896	-0.105061	0.201715	-0.306296	0.00167808	0.0198333	0.250812	-0.0386263	0.300279	0.175842	0.0433134	0.103756	-0.210547	0.30877	0.191405	0.216027	-0.271643	-0.318385	-0.0972483	0.20485	-0.000979381	0.14346	-0.0571393	-0.0676749	-0.176541	0.019165	-0.18882	0.112032	-0.0599164	-0.13468	-0.0525075	-0.110761	-0.0289835	0.0472351	-0.18667	-0.15622	0.0524052
GLIOMA	-0.120487	0.105056	-0.0114647	0.170202	0.0551861	0.123313	-0.0167713	-0.0575368	-0.177463	0.111573	-0.0886776	-0.0579192	0.0398675	0.128085	0.0995809	-0.0451724	0.0718664	-0.151445	0.171484	0.0608194	0.290778	0.0799458	0.0283307	-0.102725	-0.0855522	0.165592	0.115896	0.130483	-0.213493	-0.156906	0.114714	0.0822845	-0.0447442	0.0641082	0.159658	-0.105085	-0.117056	0.0150394	-0.280295	-0.149219	0.0425093	-0.093263	-0.112026	-0.15477	0.00447325	-0.013626	-0.094959	0.229047	0.0446939
PROSTATE_CANCER	0.0244674	-0.198903	-0.129045	0.0213552	0.0646397	0.0684716	0.14203	-0.0459434	-0.0285475	0.0123631	-0.0647657	0.0793532	0.0498025	-0.00392265	0.0158508	-0.104541	0.210711	-0.0841421	0.144415	0.104781	0.334321	0.0513775	-0.0445809	-0.0480203	-0.0949381	0.270739	0.198215	0.28448	-0.201759	-0.297157	-0.0604713	0.00966032	-0.0845338	0.0956427	0.240042	-0.102705	-0.220532	-0.0484955	-0.281451	-0.138887	-0.0482174	-0.0351757	-0.119989	-0.071156	0.125953	0.153625	-0.216811	0.0534957	0.019928
THYROID_CANCER	0.0191525	0.0894156	-0.019523	0.0534163	0.0148674	0.0260373	0.219433	0.0207001	0.0643281	0.181226	-0.0685102	-0.0512376	0.0761723	-0.201364	0.132925	-0.210468	0.17187	-0.337104	0.218896	-0.0227669	0.208463	0.124095	0.117437	-0.0516151	0.144711	0.128822	0.249587	0.28099	-0.423709	0.0155594	0.202355	-0.00440084	-0.214536	0.208609	0.24708	-0.0557228	-0.0750983	-0.0146734	0.0576399	0.131782	-0.104243	0.104869	0.152402	-0.123728	-0.0113951	-0.0429106	-0.260607	-0.203567	-0.221542
BASAL_CELL_CARCINOMA	-0.145397	-0.11945	-0.126557	0.0757417	-0.280143	-0.0391965	0.299195	0.20781	-0.119792	0.090862	-0.0548291	0.01206	-0.00214192	0.209381	0.243172	0.0113477	0.21265	-0.084388	0.0897992	0.0439773	0.332066	-0.120612	-0.0336387	-0.207457	-0.126975	0.113844	0.0746905	0.0994075	-0.12818	-0.287987	0.0542353	0.169472	0.0701601	0.215634	-0.194944	-0.210796	-0.273672	0.00778067	0.173507	0.321919	-0.0281486	0.179806	0.0861155	-0.0411021	-0.0934629	0.0717306	-0.280587	-0.0157611	-0.402498
MELANOMA	-0.0351815	0.139924	-0.026092	0.139997	0.163057	0.159235	0.118342	0.100933	0.0419035	-0.00210698	-0.0106697	-0.117371	0.13981	-0.20911	0.0882378	0.0329148	0.0263337	-0.168385	0.185392	0.0218375	0.175601	0.0723099	0.0944996	-0.13821	0.0189004	0.0876195	-0.0209727	0.262833	-0.292758	-0.263685	0.0499649	0.132556	-0.173751	-0.0728244	0.278243	0.0146807	-0.0622239	-0.00674417	-0.265203	0.127722	-0.028064	-0.0191815	0.0249669	-0.0440576	0.0264626	0.0375673	-0.180918	0.0363053	-0.035886
BLADDER_CANCER	0.00301415	0.106485	-0.158749	0.0429359	0.0327794	0.252324	0.000213149	-0.124536	-0.179378	0.161733	-0.0835919	0.11365	0.425971	0.0273982	0.260283	0.085525	0.213658	-0.0858218	0.396923	0.0901857	0.264068	0.148268	-0.0956275	-0.219699	0.0834893	0.14183	0.109389	0.154628	-0.365791	-0.184555	0.0878725	0.0949953	-0.371113	0.0674723	0.191882	-0.0826971	-0.188566	-0.100296	-0.348007	-0.0784211	-0.0421746	-0.0812515	-0.224917	-0.190602	0.213626	0.217816	-0.172116	-0.131771	-0.0666542
CHRONIC_MYELOID_LEUKEMIA	-0.0388248	0.142597	-0.08146	0.0994618	0.162363	0.179132	-0.0196573	-0.0850604	-0.158621	-0.0939524	0.0207364	-0.042562	0.124555	0.0573659	0.151716	-0.168874	0.138536	-0.0375733	0.100229	0.231468	0.101365	0.0507896	0.112831	-0.0552527	-0.280104	0.291927	0.302501	0.180335	-0.0929706	-0.0689795	0.0715985	0.0874984	-0.143654	-0.0246002	0.257206	-0.073253	-0.212204	-0.0553945	-0.325741	-0.191557	-0.0404342	-0.0759992	-0.316506	-0.101075	0.195224	0.0538927	-0.37057	0.068539	0.0064341
ACUTE_MYELOID_LEUKEMIA	-0.106595	0.0056516	-0.0164528	0.0904761	0.21583	-0.140425	0.193055	-0.126792	0.0314367	0.0805841	-0.026975	-0.129091	0.179075	-0.00256791	0.194934	-0.102355	0.175133	-0.0978492	0.10582	0.122181	0.116103	0.0120702	0.131739	-0.0597408	-0.16712	0.302434	0.0960032	0.150328	-0.300421	-0.185066	0.0730801	0.230619	-0.0613487	-0.0846404	0.00654729	-0.0432513	-0.152951	0.123427	-0.268636	-0.0913842	0.035539	-0.230873	-0.223762	-0.00982174	0.0963003	-0.0676564	-0.210875	-0.163385	0.0481738
SMALL_CELL_LUNG_CANCER	0.0746679	-0.0685491	-0.139856	0.0185285	0.104642	0.0755003	0.104795	0.14483	0.125598	0.019761	-0.178154	-0.108663	0.0410223	0.0939502	-0.0386335	-0.0965082	0.354469	-0.325192	0.0310986	0.223046	0.209795	-0.067349	-0.106931	-0.0830173	-0.0218513	0.161819	0.284	0.344623	-0.103439	-0.276312	-0.0787815	0.00167532	-0.141462	0.119595	0.0720392	-0.146313	-0.114272	0.0216196	-0.229341	0.0631821	-0.0872545	0.0190814	-0.152118	-0.0925101	-0.045572	0.263323	-0.159307	0.202022	-0.0778452
NON_SMALL_CELL_LUNG_CANCER	-0.290641	0.0537904	0.109539	0.0437412	0.0443784	0.186534	0.0789744	-0.0392321	-0.337107	0.133887	-0.0428618	-0.00223091	0.205553	0.0608362	0.193019	-0.274978	0.075068	0.0523326	0.264499	0.216015	0.267963	0.0220536	-0.0579624	-0.0561933	-0.122819	0.198176	0.0705508	0.165378	-0.208563	-0.291569	-0.0436313	0.116139	-0.0804096	0.100496	0.20398	0.0414952	-0.122355	0.167701	-0.2218	-0.05815	-0.000174917	-0.207273	-0.0513471	-0.157147	0.0704073	0.170537	-0.218272	0.0691207	0.0132602
ASTHMA	-0.0196592	-0.301095	-0.125385	-0.294687	-0.013226	0.351436	-0.335544	0.433493	0.254292	0.213934	0.202251	0.143751	-0.417404	0.0665916	-0.192584	0.253783	0.256275	0.25251	0.0640237	-0.0295304	0.187704	0.035014	-0.272229	-0.373116	-0.0663405	0.0349687	-0.212571	-0.313652	0.00420712	-0.204333	0.121037	-0.0133041	0.115116	0.247636	-0.0469191	-0.229877	0.443725	-0.103286	0.376414	0.186993	-0.32413	0.440753	0.378768	0.156507	-0.19896	-0.202106	-0.161384	-0.150301	-0.0166577
AUTOIMMUNE_THYROID_DISEASE	0.138696	-0.238597	-0.166935	-0.0398261	0.247729	0.290542	-0.321565	0.40022	0.449764	0.195775	-0.187891	0.226499	-0.309349	-0.137618	-0.275588	0.256106	0.25908	-0.0710188	0.238238	-0.160378	0.0290158	-0.345202	-0.198652	-0.0291001	0.191046	-0.0805039	0.0343254	0.291156	-0.209612	-0.0386823	0.116709	-0.274819	-0.0421676	0.0331898	0.0115159	-0.350064	0.281651	-0.233636	0.0590004	0.209087	-0.203387	0.203412	0.243548	0.171146	-0.0709192	-0.199507	0.0408483	-0.0219272	-0.00372084
SYSTEMIC_LUPUS_ERYTHEMATOSUS	0.211154	0.0562351	0.0388348	0.227282	0.0127063	0.0625709	-0.251281	0.190192	0.0514432	-0.0600534	-0.161663	0.175142	-0.0534708	-0.0269611	-0.196658	-0.0274577	0.200102	0.0180055	-0.0642695	0.0976512	0.119978	0.18233	0.00331542	-0.0170168	-0.156114	-0.133953	-0.0492998	0.0483479	-0.199179	-0.0205673	0.111391	-0.123281	0.184321	-0.140667	0.0215418	-0.174977	-0.0856711	0.251443	-0.100027	-0.0866922	-0.20857	0.0822109	0.0579094	-0.289343	0.2375	-0.0620434	-0.1642	-0.117639	0.137836
ALLOGRAFT_REJECTION	0.182924	-0.309556	-0.0658535	-0.00229255	0.271226	0.230034	-0.280088	0.337971	0.518221	0.301225	-0.180914	0.103697	-0.399004	0.0345972	-0.275083	0.366756	0.455673	-0.272485	0.122964	-0.229075	0.055372	-0.19868	-0.374849	-0.167711	0.15051	0.158241	-0.135984	0.278407	-0.260024	-0.0993109	0.0751713	-0.240123	-0.0701998	-0.249325	-0.069036	-0.290875	0.430914	-0.267747	0.232478	0.365486	-0.277844	0.285468	0.304265	0.214067	-0.214671	-0.175698	0.101878	-0.157012	-0.0394118
GRAFT_VERSUS_HOST_DISEASE	0.257247	-0.249641	-0.121573	-0.0718634	0.115751	0.169951	-0.25618	0.279654	0.585471	0.218797	-0.221437	-0.0316897	-0.345424	0.0191096	-0.274534	0.378508	0.44898	-0.186022	0.0865901	-0.351663	-0.06025	-0.228486	-0.223662	-0.183602	0.279248	-0.0846375	-0.0481314	0.366326	-0.246182	0.00463263	-0.0547401	-0.31546	0.0337898	-0.307748	0.110907	-0.367535	0.407843	-0.218984	0.0248521	0.330501	-0.406491	0.245709	0.194288	0.09548	-0.333845	-0.229375	0.271731	0.050175	0.112948
PRIMARY_IMMUNODEFICIENCY	0.00751099	-0.138866	0.279706	-0.0250415	0.247423	0.0752287	0.0232137	0.0714428	0.0821804	0.201216	-0.235018	-0.3505	-0.146249	-0.112389	-0.266776	0.22161	-0.165254	-0.415525	0.203023	0.0576012	0.14102	-0.15551	0.0980468	-0.120844	0.147918	0.194302	-0.0951255	0.0319384	-0.243105	-0.0663127	0.260359	-0.166115	-0.266734	-0.173607	0.0692873	-0.0387974	0.162806	-0.0810542	0.0725039	0.105709	0.227443	0.41578	0.289679	0.0292626	-0.241896	-0.117048	-0.141963	0.0240554	-0.113702
HYPERTROPHIC_CARDIOMYOPATHY_HCM	-0.0444189	0.204622	-0.178789	-0.0742418	-0.0339101	-0.120084	-0.0419329	0.0695357	0.0518298	0.0764574	0.0837273	0.0612981	0.0322737	0.0872493	-0.0240555	0.258581	-0.120875	-0.239291	-0.130638	-0.113612	0.260739	-0.173358	-0.0101266	-0.000512419	-0.0056781	0.0484357	-0.0388784	0.369492	-0.0839131	-0.123207	-0.221714	-0.0836729	0.0755322	0.0612155	0.0513406	0.0550386	0.0756224	0.0279156	0.0264107	-0.0344817	0.0795069	0.0903526	0.0510798	-0.00106661	-0.202078	-0.054872	-0.210594	-0.00211328	-0.200564
ARRHYTHMOGENIC_RIGHT_VENTRICULAR_CARDIOMYOPATHY_ARVC	-0.102698	0.254212	0.0273943	-0.0329418	0.0109496	-0.273072	-0.0903393	-0.0614549	0.00665681	0.0843117	0.0956767	0.0239549	0.0676231	0.0584406	0.0334795	0.0488623	0.0943828	-0.172566	-0.0881416	-0.0410079	0.341129	0.027485	0.168126	0.023162	-0.0761224	0.0607426	0.11262	0.277495	-0.176519	-0.100849	-0.153521	0.0478769	0.0840005	0.154537	-0.0492227	0.0588412	0.00855523	0.0305079	-0.175782	-0.0566919	0.0161517	-0.0434244	0.0359358	-0.00900768	-0.229237	0.0379245	-0.159621	-0.131776	-0.251689
DILATED_CARDIOMYOPATHY	-0.0928667	0.121383	-0.117729	-0.00354339	0.0515605	-0.108179	-0.0720746	0.104815	-0.0436733	0.0841904	0.0270483	0.121582	-0.01439	0.105156	-0.0478371	0.29208	-0.0455054	-0.18444	-0.0979554	-0.148402	0.240572	-0.130428	0.0206054	0.165029	-0.104708	0.085581	-0.0215121	0.313294	-0.121645	-0.0888806	-0.225184	0.0371287	0.0366275	0.103255	-0.00876501	0.146837	0.0388377	0.0134931	0.0493784	-0.117202	0.0425675	0.0556326	0.106869	-0.0384918	-0.251701	-0.0438415	-0.103199	0.117075	-0.315236
VIRAL_MYOCARDITIS	0.0511704	0.0370137	0.0960287	-0.151009	0.183459	0.0642389	-0.18181	0.0735665	0.203129	0.137596	0.120168	-0.08297	-0.281839	0.0561142	-0.21327	0.199765	0.223114	-0.19272	0.0854214	-0.236834	0.0807708	-0.036343	-0.284482	-0.2336	-0.0147708	0.161195	0.0737295	0.254397	-0.225519	0.0339941	0.0402206	-0.125953	-0.144401	-0.0936311	0.150904	-0.139794	0.139294	-0.206312	0.0972382	0.21992	-0.129893	0.223924	0.234335	0.187369	-0.0821948	-0.342542	0.101695	-0.147782	-0.11083
BIOCARTA_RELA_PATHWAY	0.20103	-0.530671	-0.434224	-0.148261	-0.161607	0.249242	0.447519	-0.250287	0.498697	-0.178579	-0.46291	0.0595381	0.139889	-0.10426	-0.0666627	-0.401906	0.497074	0.0229642	0.121172	-0.0613698	0.302027	-0.268324	-0.43372	-0.308709	0.232208	0.127835	0.143739	0.434605	-0.454135	-0.113828	0.199883	-0.506211	0.373236	0.206063	0.0125323	-0.377088	-0.276915	0.0522936	-0.388656	0.438177	-0.315663	0.269937	-0.146567	0.0620352	0.0019978	0.31113	-0.412174	-0.131315	0.212695
BIOCARTA_NO1_PATHWAY	-0.0678615	0.246047	0.326901	0.0203933	0.222594	-0.136668	-0.219034	0.138914	-0.174413	0.0594376	-0.144171	0.344715	0.231528	0.215189	-0.222104	0.334957	-0.290404	0.339056	0.0476827	-0.00592457	0.144592	0.226624	-0.0551975	-0.112015	0.0474514	-0.0379224	-0.331456	0.0448836	-0.30694	0.105537	-0.0310664	0.246908	-0.168968	-0.0396567	0.0140824	0.203088	0.18219	0.0474902	0.0835806	-0.238164	0.13664	-0.218405	-0.0972612	0.0709853	-0.312399	-0.216789	0.0423448	0.367362	0.00104573
BIOCARTA_CSK_PATHWAY	0.199065	0.0100884	0.170243	0.10981	-0.159329	-0.182068	-0.00755109	-0.124097	-0.196736	-0.19013	0.0270847	0.0814496	-0.0777608	0.245645	0.12715	0.0597275	0.0644048	0.0241197	0.27638	-0.0979189	0.262955	-0.139219	0.168937	0.353129	-0.260715	-0.112514	-0.0913756	0.0514558	0.12882	-0.174365	-0.16513	0.11138	-0.0161746	-0.0985919	0.172596	-0.281133	0.121991	-0.422029	-0.252898	0.194987	-0.0843879	0.0965456	0.0236891	0.0346709	0.0901604	-0.262287	0.152208	0.111318	0.380341
BIOCARTA_SRCRPTP_PATHWAY	-0.536361	-0.234601	0.486632	0.515645	0.144979	0.477297	-0.168359	-0.457109	-0.436733	-0.241026	-0.449785	-0.379753	0.61942	0.488138	0.0439112	-0.245699	0.130952	0.120765	-0.0347173	0.0552982	0.231798	0.0401309	0.485802	0.170137	0.286444	-0.0903347	0.0373551	-0.108647	0.0705586	-0.010249	-0.114129	0.0895745	0.104411	0.141671	-0.4211	-0.0658258	0.0352044	0.181598	-0.324228	-0.647301	0.473707	-0.0387308	-0.316932	-0.502307	-0.268997	-0.457424	-0.0860305	-0.399723	0.538713
BIOCARTA_AMI_PATHWAY	0.421256	-0.416468	-0.338882	0.0859811	-0.12067	0.0719948	-0.0562928	0.470479	0.54443	0.119309	-0.271777	-0.170803	-0.0814503	-0.283248	-0.279382	-0.1608	0.370698	-0.23327	-0.203229	-0.0353225	-0.340749	0.392826	-0.247683	0.244986	0.575519	-0.19443	0.233952	0.485051	-0.134446	0.0342373	0.062114	0.108867	-0.2902	-0.015037	0.0134667	0.0743329	-0.301157	0.0893716	-0.475517	0.41032	-0.32321	0.172838	0.0995999	0.44921	-0.0235382	0.205354	0.273535	-0.452064	-0.0133178
BIOCARTA_GRANULOCYTES_PATHWAY	0.531885	0.0445745	0.132122	0.134357	0.345919	-0.00567491	-0.402195	0.0765593	0.414816	-0.402189	-0.389496	-0.315012	-0.387601	-0.125962	-0.00515571	-0.189561	0.275309	-0.21193	0.0288562	-0.510229	0.34507	0.286016	-0.000525463	-0.0601416	0.276585	0.212787	0.304906	0.181486	0.0879118	-0.272566	-0.315	-0.0625539	-0.393244	-0.0982854	0.227611	-0.374654	-0.33173	0.0390992	-0.121856	0.0672882	-0.186738	0.479226	-0.00809535	0.0507268	-0.362976	0.0949409	-0.0796548	0.236269	-0.0117384
BIOCARTA_LYM_PATHWAY	0.513609	0.0769491	0.0850112	-0.0996894	0.0369825	0.0174061	0.0896913	0.253987	0.492102	-0.0223343	-0.167439	-0.213934	-0.445037	-0.259857	-0.368815	-0.257181	0.131125	-0.399089	-0.547134	-0.0598237	0.363909	-0.214651	-0.351216	-0.0994088	0.0668702	0.394794	0.509242	0.524966	0.0517664	-0.442128	-0.0632778	-0.353557	-0.279001	-0.227536	0.318392	-0.332528	-0.289596	0.0775243	-0.182104	0.159217	-0.0414462	0.675387	0.272364	0.287494	-0.232905	-0.0112793	-0.0749899	0.0807167	0.0455323
BIOCARTA_ARAP_PATHWAY	-0.184422	0.158583	0.503134	0.0448098	0.0807069	-0.0407456	0.0918933	-0.0149335	0.041884	-0.0192503	-0.0823566	-0.109526	-0.196836	0.209268	-0.0554756	-0.204923	-0.208852	-0.146076	0.0533613	-0.228776	0.232936	-0.133021	-0.0500896	-0.146223	0.0320189	0.205755	0.14649	0.391748	-0.231983	-0.250594	-0.344567	0.244383	-0.359839	-0.213918	0.308908	-0.112085	-0.254209	-0.319135	0.238745	0.044228	0.230586	-0.12987	0.42711	0.162524	-0.300031	-0.111857	-0.00633459	-0.144452	0.306237
BIOCARTA_AGR_PATHWAY	0.160727	0.0827332	-0.163973	0.124595	-0.0578817	-0.278313	0.0634824	-0.282263	-0.00272388	0.258822	0.0933426	0.0579033	-0.0662628	0.020685	-0.000779389	-0.0712684	0.152211	0.184098	0.0614056	0.0441319	0.132978	0.0972137	0.133234	-0.032389	0.0839433	0.0767207	0.232497	0.147842	-0.0537326	0.170508	0.00695138	0.131178	-0.135449	0.0239736	-0.292622	-0.145716	0.00917109	0.0282955	-0.274955	0.0663735	-0.147917	-0.0951315	-0.266639	-0.0872189	-0.293908	0.145997	-0.0029065	-0.0194877	-0.291669
BIOCARTA_AKAP95_PATHWAY	-0.344625	-0.286864	-0.101648	0.507972	-0.418953	-0.39305	0.429978	-0.306855	-0.338472	-0.448612	-0.353956	0.0645628	0.0688299	0.0550136	-0.224638	0.0129667	0.538343	0.200039	0.194451	0.197778	0.197531	-0.115046	-0.0604867	0.518525	-0.228412	0.0515012	0.0116712	-0.0525461	-0.466585	-0.182426	0.0327565	0.0235076	0.21471	-0.31492	-0.0948409	-0.381525	0.145954	0.146514	0.000287772	-0.164598	0.116912	0.237508	0.173796	-0.638332	-0.0412329	-0.121407	-0.349998	-0.0554338	0.491908
BIOCARTA_AKT_PATHWAY	0.132642	-0.348872	-0.0856416	0.115862	0.265906	0.0560161	-0.0399136	-0.225972	0.20453	-0.0311726	-0.187143	-0.0504928	0.259326	0.0304029	-0.332738	-0.302255	0.28411	0.108038	-0.0427595	-0.104906	0.147294	0.164866	-0.0230847	-0.176833	-0.333634	0.22419	-0.172256	0.232066	-0.245834	-0.185424	-0.446816	-0.0959213	-0.013671	0.213492	0.171211	-0.385738	-0.246718	0.138895	-0.431823	0.120724	0.0475406	-0.409955	-0.212104	0.268081	0.205464	0.00961907	0.130761	0.166419	0.367693
BIOCARTA_ALK_PATHWAY	0.191768	-0.0540651	-0.176113	-0.0138849	0.100871	-0.151648	0.162137	0.304438	0.00444523	-0.04226	0.180803	0.247252	0.117648	-0.0159473	-0.0593697	0.0935749	0.246085	-0.0596689	-0.174299	0.144355	0.285384	-0.126775	-0.41445	0.0544059	-0.217331	-0.0351251	0.248983	0.236917	0.0398206	-0.273952	-0.170486	-0.0818253	-0.0879008	-0.0575193	0.376754	-0.0763518	-0.265774	-0.267381	0.183182	0.127859	0.108988	0.0274374	-0.0206204	0.00816138	0.00933829	-0.141532	-0.160296	0.188322	-0.132695
BIOCARTA_AT1R_PATHWAY	-0.0347668	-0.0766434	0.233383	0.323963	0.374217	-0.055209	-0.217679	-0.218572	-0.0994796	0.321664	0.237204	-0.0948774	0.0434209	-0.0902795	0.00178136	-0.159443	-0.101816	0.156676	0.0547079	-0.15508	0.20321	0.109824	0.211453	-0.101583	0.0716226	0.058055	-0.153138	0.236051	-0.144269	0.0379897	0.112117	0.0852006	-0.12716	0.250709	0.0798981	-0.26202	-0.284969	0.0901064	-0.326111	-0.140555	-0.205171	-0.350713	-0.277566	-0.0495303	-0.225255	-0.0885953	-0.0632666	0.0856038	0.0849307
BIOCARTA_ACE2_PATHWAY	0.249353	-0.515974	-0.191881	-0.0877511	-0.410615	-0.00571556	0.138202	0.450755	0.377893	0.205294	0.08696	0.207855	-0.0291316	-0.368424	-0.26532	-0.124323	0.185781	0.312919	-0.149255	-0.12736	-0.470907	-0.225772	-0.352917	0.150777	0.477738	0.0123696	-0.0027629	0.454046	-0.299202	0.0339604	0.467985	-0.333898	0.169899	0.477611	-0.056091	-0.255241	-0.209093	0.315196	0.00925339	0.338764	-0.483986	0.282868	0.126915	-0.072633	0.156579	0.288692	0.334167	0.376519	-0.140277
BIOCARTA_ASBCELL_PATHWAY	0.128522	-0.571373	-0.103729	0.119264	-0.0445203	0.132365	-0.313545	0.448935	0.285415	0.0156952	-0.295297	0.455239	-0.225549	0.0447044	-0.0476655	0.263344	0.154395	-0.34164	0.229787	-0.0253264	0.247832	-0.321986	-0.435764	0.345294	-0.46538	0.33902	0.0312378	0.317547	0.276676	-0.148791	0.205341	-0.381426	-0.226667	-0.138779	0.310453	-0.549849	0.0258335	-0.443995	0.061381	0.32556	-0.0117327	0.31688	0.400827	0.0155579	-0.243828	0.218438	-0.475026	0.0894375	0.156253
BIOCARTA_DNAFRAGMENT_PATHWAY	0.0562997	-0.396043	-0.223444	0.111688	0.348647	-0.398655	0.0221954	-0.100499	-0.625663	0.086962	-0.441173	0.414494	0.338481	0.0370822	0.459621	0.552943	0.676539	0.00899284	0.0118166	0.320428	0.30133	0.259705	-0.336758	-0.331377	-0.438007	-0.143432	0.398111	0.00751987	-0.0480208	-0.115634	0.113257	0.0346677	-0.119696	0.0468725	-0.538176	-0.0527317	0.322216	-0.329609	-0.136355	-0.422274	0.118541	-0.0574	0.317476	-0.461118	0.464063	-0.218856	0.418117	0.119706	0.0903164
BIOCARTA_CHEMICAL_PATHWAY	-0.0110651	0.00721361	0.30463	0.251935	0.120554	0.151932	-0.170527	-0.263899	-0.245177	0.36921	-0.27736	-0.32868	0.00525247	0.159461	-0.207813	-0.382033	0.335018	-0.21471	0.183675	-0.00231654	0.194554	-0.157375	0.132791	-0.224771	-0.0656565	0.469613	-0.00764168	0.177523	0.088154	0.0526269	0.118571	-0.12991	0.00207504	0.246553	0.00357774	-0.271136	0.0534933	-0.0940858	-0.552213	-0.0670293	0.319005	0.158785	-0.170721	-0.267941	0.296338	-0.0599294	-0.0554164	-0.207941	0.331245
BIOCARTA_SPPA_PATHWAY	0.300777	-0.103523	0.343182	0.00325402	0.390627	-0.156663	-0.0954931	-0.416947	-0.0704697	0.0332374	0.28101	-0.283204	0.251868	0.258588	-0.20012	-0.381005	-0.0065712	0.174848	0.0139623	-0.171704	0.0390528	0.110009	0.115611	-0.270208	0.277151	-0.0943446	-0.0635123	0.400484	-0.224089	0.160758	0.0844361	0.196812	-0.008936	0.0628634	-0.0751107	-0.150743	0.188304	0.0885925	-0.181363	-0.318672	-0.184569	0.00814016	-0.0955525	0.016724	-0.101165	0.0521358	-0.0296108	-0.32104	-0.0275659
BIOCARTA_ATM_PATHWAY	0.15193	-0.079041	-0.208688	0.0571998	0.265007	0.0612113	-0.265357	-0.164089	0.110583	-0.0473331	-0.0386229	0.329811	0.590148	-0.0992391	0.10472	0.0830548	0.0879215	-0.00211712	-0.0658586	0.272502	0.345399	-0.0381297	-0.0736522	-0.115086	-0.254662	0.147946	-0.0387189	-0.288008	-0.016919	0.041024	0.0286155	-0.369198	-0.474784	-0.06419	0.126047	-0.401466	-0.146945	0.379356	-0.224955	0.0659233	-0.23965	-0.156138	-0.274159	-0.0186224	0.171812	0.10222	-0.323536	-0.18825	0.155565
BIOCARTA_AGPCR_PATHWAY	0.296956	-0.0678058	0.481219	-0.0993576	0.0518178	-0.286795	0.302605	-0.230641	-0.0553107	-0.264079	0.165665	-0.182365	0.342536	0.450283	0.00438862	0.050056	-0.0493349	0.591845	-0.0492983	-0.409693	0.0838432	-0.178822	-0.0634508	0.159758	-0.455038	-0.334338	-0.329303	0.127501	-0.119741	-0.0205453	-0.0428726	0.289232	0.0715305	0.0102269	0.0637431	-0.345004	0.173103	-0.00425682	0.00329186	0.0848618	-0.111332	0.158164	0.201051	0.154758	-0.230156	-0.532438	0.474566	0.161383	0.424967
BIOCARTA_BCELLSURVIVAL_PATHWAY	0.0460406	-0.349523	0.0768496	0.230707	0.348108	-0.191005	0.382768	-0.18914	0.0546481	0.00519591	-0.386249	-0.0170692	-0.0639686	0.014772	-0.235907	0.00156004	0.149955	0.0996914	-0.183954	0.0453356	0.251859	0.224233	0.223088	-0.250126	-0.158019	-0.0742632	0.0885308	0.434326	-0.0121981	-0.247944	-0.374622	0.141137	0.296163	-0.113062	-0.0171088	-0.251243	-0.396098	0.0689927	-0.2688	-0.0759801	0.198817	-0.0405999	-0.10967	-0.270486	-0.0936793	-0.0375191	0.21295	0.0875892	0.0986844
BIOCARTA_BLYMPHOCYTE_PATHWAY	0.187705	-0.168239	-0.0392748	-0.104451	0.0279187	0.00431306	-0.120937	0.0701751	0.539866	0.154599	-0.365111	-0.0628682	-0.403831	-0.122038	0.0568826	-0.0611832	0.197784	-0.183822	-0.145127	-0.306241	-0.00962147	-0.534632	-0.523181	-0.153533	0.0417112	-0.16217	0.388019	0.153686	0.455816	-0.509998	0.358193	-0.553138	-0.12118	0.0963451	0.0320502	-0.426818	0.211221	-0.0800776	0.271297	0.461508	-0.217431	0.551688	0.141408	0.077561	-0.26118	-0.0486006	-0.1396	-0.0286417	0.0642733
BIOCARTA_BCR_PATHWAY	-0.074845	0.0506261	0.289251	0.36426	0.339213	0.0505219	-0.190029	-0.295533	-0.333925	0.31368	0.166504	-0.226468	0.201891	-0.129352	-0.113239	-0.0870071	0.0393133	0.302124	0.071884	-0.124735	0.273792	0.25683	0.296861	0.135867	0.133542	0.247485	-0.104442	-0.023274	-0.134985	-0.0184909	0.123373	0.181571	-0.193259	-0.213907	-0.0676705	-0.36882	0.0664526	-0.0406974	-0.362131	-0.404439	0.012675	-0.169677	-0.211978	-0.28162	-0.13186	-0.0666051	0.330516	-0.0812724	0.0801944
BIOCARTA_BIOPEPTIDES_PATHWAY	-0.0817205	0.268268	0.205427	0.0970271	0.268902	0.147636	-0.0281042	-0.33612	-0.185759	0.291385	0.130935	-0.218747	0.289518	0.347912	-0.113592	-0.205734	-0.185996	-0.0238279	0.101011	-0.00973898	0.124634	0.190303	0.257959	-0.058349	0.214141	0.275809	-0.15246	0.203044	-0.179918	-0.12725	0.0193719	0.0338963	0.19952	0.131845	-0.107074	-0.264593	0.0452243	-0.0146959	-0.254477	-0.187877	-0.134286	-0.337755	-0.308249	-0.125173	-0.308179	-0.239071	0.214218	-0.220434	-0.0243477
BIOCARTA_NEUROTRANSMITTERS_PATHWAY	0.761134	0.380784	0.148252	0.414803	0.0603792	0.215006	-0.672899	-0.16264	0.552464	0.7608	0.441152	-0.526049	0.096887	-0.659606	0.137441	-0.165374	-0.603789	-0.502816	-0.216088	-0.111542	-0.0240003	0.488295	0.293029	-0.0902039	0.1575	0.573309	-0.45233	0.0995022	0.418893	0.0446003	0.0572155	0.057975	-0.123987	0.237996	0.511497	-0.0778537	-0.576729	0.126561	-0.491553	-0.219937	-0.505992	-0.0164822	-0.263187	-0.514305	0.679919	-0.416631	-0.344954	-0.306287	0.516408
BIOCARTA_RANKL_PATHWAY	0.576769	-0.189422	-0.530769	0.300236	0.298555	-0.209254	0.103644	-0.421777	0.519624	0.276518	-0.287218	-0.1518	-0.162332	-0.0147045	-0.534033	-0.221274	0.18238	0.0826262	-0.320041	0.238297	-0.0189422	0.0344548	-0.256821	0.0174045	0.0242852	-0.0119912	-0.0389717	0.194222	-0.439248	-0.16234	0.150774	-0.351819	-0.00789866	0.263564	0.498772	-0.584341	-0.338342	-0.126659	-0.533868	0.319689	-0.309095	-0.0339568	0.0820933	0.088584	0.139573	-0.139807	-0.167312	0.554638	0.390723
BIOCARTA_CACAM_PATHWAY	0.00160418	0.374736	-0.00982583	0.440145	0.201328	-0.124523	-0.202555	0.224536	-0.29782	-0.0583594	-0.380236	0.372614	0.248417	0.611673	0.0589565	0.0582451	-0.293952	-0.04602	-0.312051	-0.0936896	0.274355	0.400955	0.151019	0.167537	0.172528	0.417798	0.0600217	-0.31402	0.305686	-0.159458	0.2188	0.241689	0.10493	0.263409	0.00848116	-0.152296	0.125347	-0.501767	-0.203158	-0.36237	0.0617906	-0.507375	-0.548408	-0.320778	-0.563022	-0.422939	0.341483	0.59592	-0.0622881
BIOCARTA_CDMAC_PATHWAY	0.458618	-0.228452	0.0999338	0.431321	0.499377	0.171399	-0.301373	-0.460289	0.261296	-0.0355369	0.100958	-0.408572	0.241933	0.0595874	0.0438728	-0.200936	0.361148	0.260779	0.106258	0.125995	0.455483	0.136147	-0.101318	-0.300264	0.156422	0.0483078	-0.300961	0.169469	-0.431952	-0.151751	-0.245253	-0.200762	0.0761144	0.132372	0.371301	-0.299753	-0.303396	0.240971	-0.445586	-0.152555	-0.173868	-0.391857	-0.358301	0.33468	-0.236384	-0.221064	-0.0310811	-0.166565	-0.216596
BIOCARTA_CARM_ER_PATHWAY	-0.0924888	0.143241	0.0449625	0.0577677	-0.236181	0.32437	0.0162969	-0.0272743	-0.359489	-0.253239	-0.161991	0.291765	-0.110944	0.26075	0.0198423	0.2945	0.106049	-0.135863	0.249556	0.143042	0.193532	0.0812652	0.25266	0.0395298	-0.118884	0.233187	0.266601	-0.336609	-0.362337	-0.214968	0.282516	0.0517433	-0.0280444	0.103737	0.162488	0.444525	-0.336011	-0.055893	-0.00384692	-0.212404	0.329092	0.250431	-0.197732	-0.0467986	0.056363	-0.256627	-0.422209	-0.167136	-0.00981298
BIOCARTA_CASPASE_PATHWAY	0.342704	-0.333949	-0.256495	0.113576	0.355577	-0.218904	-0.220997	-0.203622	-0.175883	0.392496	0.00947605	-0.00302577	-0.103692	0.0789028	-0.401277	0.0722773	0.563485	-0.20799	0.0626884	-0.1281	0.0791109	0.0686079	-0.0796534	-0.0592405	0.13241	0.246385	-0.101744	0.440592	-0.100355	-0.318237	0.316677	-0.42361	0.0907293	-0.106679	-0.29299	-0.44977	0.0565081	-0.311664	-0.257885	0.151042	-0.253259	0.254202	0.329142	-0.321451	0.128775	0.14205	0.373444	-0.198955	-0.0615413
BIOCARTA_CBL_PATHWAY	-0.150088	0.33337	-0.0870541	-0.0452271	0.296937	0.0410765	-0.145924	0.258892	0.124186	0.437837	-0.0968999	-0.333221	0.492284	0.341891	0.111502	-0.425155	0.0891741	0.0166782	-0.0408211	-0.0978038	0.323068	0.134626	0.136934	0.224172	0.114663	-0.0493987	-0.100238	0.469801	-0.187649	-0.194752	-0.0207294	-0.239045	-0.132835	0.197428	-0.115438	0.139726	-0.375563	0.13429	-0.539237	0.250906	0.171152	-0.232916	0.453337	-0.14477	-0.136964	-0.340765	-0.340743	-0.360441	-0.117403
BIOCARTA_CCR3_PATHWAY	0.220146	-0.0623912	0.232054	0.255152	0.440081	-0.283913	-0.072923	-0.479266	-0.115674	0.174787	0.0940356	-0.0496652	0.301067	-0.0373088	-0.013705	-0.518586	-0.0337681	0.22196	0.270186	-0.404086	0.414576	0.102802	0.325401	0.00983875	-0.202183	0.158175	0.0284239	0.142111	-0.329942	-0.166308	-0.170457	0.360283	-0.239727	0.248948	-0.0295821	-0.189492	-0.0104919	-0.134455	-0.223954	0.0636488	-0.0146703	0.0417245	-0.089728	-0.221854	-0.0760592	-0.224852	0.107827	-0.266422	0.345031
BIOCARTA_CD40_PATHWAY	0.205706	-0.46424	-0.382175	0.177203	0.224155	0.175882	0.252403	-0.0571912	0.584139	-0.352713	-0.402247	-0.196585	0.242946	-0.310245	-0.387059	0.0577356	0.463661	0.0584435	-0.170162	0.309431	0.193	-0.311504	-0.486177	-0.0753779	-0.331438	0.0308695	0.153502	0.279925	-0.341615	-0.398811	-0.264371	-0.231561	-0.200628	0.239227	0.340562	-0.378909	-0.394057	-0.29583	-0.179911	0.443981	-0.383782	0.115543	-0.0852431	0.431775	0.177894	-0.07702	-0.275239	-0.108149	0.368278
BIOCARTA_MCM_PATHWAY	-0.263005	0.213853	-0.14223	0.0617706	-0.140504	0.534455	-0.314187	0.337303	-0.626228	0.145182	0.220305	0.134106	-0.127671	0.23271	-0.012465	0.0659259	-0.0173177	-0.182514	0.298192	0.602612	0.432989	0.0605908	0.323903	0.105966	-0.50156	-0.0223903	0.417904	-0.402635	0.112657	0.0565125	0.0485254	-0.0780606	0.177081	0.455629	0.118523	0.473939	0.21425	0.22043	0.398709	-0.513677	-0.44514	-0.248808	0.0969334	-0.709173	0.045921	0.190591	-0.503637	0.371306	-0.118619
BIOCARTA_G1_PATHWAY	-0.0182063	0.302453	-0.0148377	0.39363	0.256804	0.108567	-0.241335	0.293957	-0.258041	-0.288571	0.0674084	0.374074	0.375867	0.0359719	0.300749	0.0608752	0.0668341	0.00773563	0.0600005	0.231579	-0.0508699	0.0232549	0.147854	0.109517	-0.569871	0.033099	0.483595	0.154249	0.0708072	0.0204387	-0.153225	-0.114175	-0.28021	-0.120455	0.0586259	0.110605	0.0180297	-0.0010375	-0.345755	-0.444897	0.147372	0.0486941	-0.386834	-0.418106	0.40534	-0.0192072	-0.375322	-0.0945435	-0.1031
BIOCARTA_G2_PATHWAY	-0.0572959	0.368418	0.257308	0.413253	0.225852	0.255608	-0.524956	-0.340686	-0.304045	-0.0255874	-0.282675	0.136864	0.499899	0.337477	-0.0605735	-0.0440967	-0.0317073	0.301287	0.242363	-0.233523	0.43886	-0.080376	0.470377	0.171626	-0.238413	0.127616	-0.0455757	-0.50828	0.0682784	0.11499	-0.195974	-0.00433682	-0.159188	0.179569	-0.257755	-0.0688844	0.0334644	0.264773	-0.0177898	-0.53441	-0.102886	0.0989473	-0.215156	-0.479072	-0.0864759	-0.256411	-0.450202	-0.270416	0.496421
BIOCARTA_CELL2CELL_PATHWAY	0.0820359	0.233394	0.41031	-0.234533	-0.211605	-0.00379931	0.263047	-0.135731	-0.423299	-0.11507	-0.18565	0.260813	-0.0114516	0.25119	0.429297	-0.287351	0.415473	0.0139845	-0.301149	0.0280481	0.0416531	0.0784011	-0.0416923	-0.180038	0.083019	-0.133605	0.395857	0.37552	-0.305256	-0.219986	0.364725	-0.000651573	-0.167731	-0.456548	0.0857199	0.407474	0.0467176	-0.292579	-0.0845245	-0.0710506	0.392479	0.300065	-0.0990455	-0.433565	-0.272424	0.27142	-0.302238	-0.381044	-0.0169493
BIOCARTA_LAIR_PATHWAY	0.211288	0.164766	-0.173229	0.150306	0.195734	0.0749921	-0.160535	0.0784751	0.426502	-0.10344	-0.415646	-0.175993	-0.158894	-0.183459	-0.263613	-0.102093	0.356301	0.152689	-0.172585	-0.296532	0.277578	0.338163	-0.149234	-0.216015	0.140691	0.211149	0.373286	0.475185	-0.269139	-0.396351	-0.289901	-0.406391	-0.158461	0.333242	0.470931	-0.340759	-0.25864	0.178633	-0.0228578	0.12022	-0.260718	0.388939	-0.0392515	0.1372	-0.414871	-0.0871548	-0.172056	-0.105887	0.183563
BIOCARTA_CERAMIDE_PATHWAY	0.208572	-0.489625	-0.214479	0.0381261	0.023184	0.030421	-0.0220823	-0.32316	0.244796	-0.0524362	0.00788773	-0.212149	0.139048	-0.479884	-0.128904	-0.252747	0.470229	-0.142787	0.384513	-0.196345	0.0970127	-0.328439	-0.335051	-0.08447	0.435791	-0.137494	-0.151805	0.290433	-0.246353	0.130747	0.347348	-0.305888	0.0153829	-0.117759	-0.292388	-0.497388	0.165159	0.05755	-0.269469	0.00109949	-0.281037	0.336181	0.0492557	0.153714	0.00746711	-0.25919	-0.275811	-0.270994	0.245577
BIOCARTA_TID_PATHWAY	0.30907	-0.1395	-0.130373	-0.0711496	-0.017916	-0.122204	0.198463	0.0112447	0.42916	-0.0755239	-0.396357	-0.351042	0.101124	-0.0567343	-0.277391	-0.13182	0.203544	-0.118157	-0.142423	-0.175116	0.480558	-0.0535706	0.136514	0.116194	-0.202292	0.0362561	0.0101038	0.439895	0.198582	0.0021085	-0.314145	-0.34046	-0.130362	0.125096	0.124754	-0.396577	-0.282391	0.0484735	0.0127508	0.336411	-0.268287	-0.177554	-0.251793	0.103157	-0.15699	0.0319902	0.111334	0.13419	0.0521483
BIOCARTA_CLASSIC_PATHWAY	-0.0991187	0.260632	-0.165663	0.17572	0.04616	0.356665	0.0603908	-0.0620067	0.639403	-0.155684	-0.199996	-0.412078	-0.200418	-0.510618	-0.381398	-0.254311	0.365908	-0.306318	0.0189352	-0.0250501	-0.0714534	0.661343	0.0295466	-0.0163031	-0.033503	-0.0578067	0.38162	0.617961	-0.471963	-0.366794	-0.208963	0.0415324	-0.387225	0.417787	-0.0104351	0.247263	-0.314664	-0.408843	-0.101112	-0.0155358	0.246582	-0.345316	0.376185	0.295444	-0.511553	0.0109074	-0.350399	-0.129199	0.430269
BIOCARTA_COMP_PATHWAY	-0.0586535	0.242492	0.0338804	0.104932	0.0121878	0.489834	0.0295957	0.200464	0.469751	-0.103057	-0.208313	-0.480185	-0.261198	-0.304229	-0.235849	-0.355388	0.309005	-0.346134	0.0671698	0.0316725	0.0692691	0.541191	0.109658	-0.112372	-0.0509538	0.114799	-0.0149087	0.403396	-0.311946	-0.522713	-0.263074	0.0278728	-0.293821	0.258308	0.115501	0.398445	-0.330813	-0.27354	-0.0396205	-0.0542126	0.143959	-0.117037	0.262423	0.186677	-0.302525	-0.0958951	-0.332083	-0.165397	0.378865
BIOCARTA_VDR_PATHWAY	-0.158847	-0.453104	0.414372	0.229389	-0.218685	0.2703	0.0216355	-0.44917	-0.632218	-0.0814472	0.118492	0.267297	0.319124	0.376097	0.272859	-0.349916	0.281905	0.155012	0.168514	-0.112757	0.476827	-0.454841	0.181584	-0.317928	-0.181869	0.322636	0.147778	0.281924	-0.486169	0.0640174	0.417486	0.00451488	0.138032	-0.147436	0.00376361	0.319606	-0.257076	-0.454296	-0.14088	-0.13193	0.156067	0.237048	0.0615227	0.0993362	-0.335045	0.111587	-0.645365	-0.232323	-0.0751591
BIOCARTA_HDAC_PATHWAY	-0.175823	0.0610305	0.274112	0.315702	0.346186	0.114053	-0.169046	-0.067438	-0.449217	0.0802678	0.0358103	0.291151	0.127843	0.0774758	-0.30822	0.0394961	-0.0903066	0.16504	0.0351878	-0.12899	0.247928	0.234295	0.0941388	0.105154	0.014735	0.15695	-0.274485	0.207552	-0.0626821	0.150496	-0.0793713	0.313878	-0.0523249	-0.0277247	0.0734566	-0.0598381	-0.0555195	0.0394267	-0.192409	-0.0958061	-0.106683	-0.374204	-0.32507	-0.0398936	-0.427144	-0.192364	0.0597617	0.322142	0.14668
BIOCARTA_GCR_PATHWAY	0.190277	-0.267392	0.339674	0.229522	0.46097	-0.213511	-0.293641	-0.292507	0.051051	-0.0321966	-0.276996	0.225613	0.367781	0.203724	-0.36457	-0.152501	-0.011352	0.322073	0.0155691	-0.0302871	0.172012	0.432968	0.154504	0.122633	-0.280027	-0.141135	-0.229253	0.257916	-0.175892	-0.218886	-0.184081	0.0263274	0.112582	0.242716	0.221716	-0.411302	0.0735283	0.0225817	-0.195429	-0.172363	-0.221819	-0.378015	-0.331292	-0.0667325	0.0645075	-0.188571	0.482009	0.332174	0.326262
BIOCARTA_CTCF_PATHWAY	-0.229087	-0.334127	-0.0948172	0.273104	0.230156	-0.00814938	0.0129423	0.378822	-0.100499	-0.403581	-0.134429	0.027174	0.0263642	0.162089	0.203352	0.26104	0.000230608	-0.143905	-0.214348	0.295388	0.424887	-0.106217	0.164068	-0.221936	-0.279921	-0.215049	0.422314	0.180803	-0.0155942	-0.264336	-0.0997259	0.0646089	-0.0668944	0.00560502	0.399635	-0.0973109	-0.154135	-0.0347699	-0.0529867	-0.108366	0.10302	0.0369472	-0.239442	-0.392801	-0.0524313	-0.119007	-0.128776	0.166882	0.00695669
BIOCARTA_CTL_PATHWAY	0.517149	0.0406176	-0.0722071	0.00074853	0.257189	0.170715	-0.148104	0.45924	0.652467	0.350124	-0.372589	-0.385457	-0.245819	-0.380845	-0.332819	0.20134	0.20447	-0.345461	0.210649	-0.629552	0.0874544	-0.372919	-0.258211	-0.0534641	0.390023	0.386321	0.266648	0.25247	0.091862	-0.240266	-0.127649	-0.264799	-0.121914	-0.418556	0.0928339	-0.300538	-0.370831	-0.290452	-0.471443	0.38792	-0.109929	0.082452	0.00927638	0.478237	-0.362247	-0.438831	0.331394	0.309793	0.132754
BIOCARTA_CXCR4_PATHWAY	0.219129	-0.253175	0.157127	-0.0179636	0.154457	0.124819	0.0274532	-0.377637	-0.204813	0.236297	0.0320402	-0.177433	0.333557	0.169141	-0.0201243	-0.274656	0.0404156	0.413615	0.0349196	0.0345074	0.223532	-0.165759	-0.0204957	-0.128537	-0.236149	-0.13189	-0.161371	0.238685	-0.103207	-0.122883	0.0350518	-0.147245	0.00409697	0.247206	0.149359	-0.251683	-0.221084	0.226288	-0.282034	-0.188553	-0.0651269	0.0020249	-0.393736	-0.184913	0.153905	-0.075845	0.202997	-0.103558	0.126475
BIOCARTA_CELLCYCLE_PATHWAY	-0.102222	0.170616	-0.0214266	0.587974	0.246474	0.294278	-0.293116	0.255773	-0.288793	-0.227204	-0.361431	0.221879	0.432516	0.268978	-0.0190908	-0.0607609	0.181375	-0.144001	0.141856	0.369404	0.187712	-0.0281127	0.211483	0.47048	-0.372159	-0.107281	0.481469	-0.0464905	0.134317	-0.305675	-0.218008	-0.0456358	-0.299468	0.181832	0.115795	0.0353095	0.135416	0.292296	-0.20869	-0.456059	-0.00759219	-0.0533965	-0.416326	-0.460738	0.234154	-0.0674352	-0.0407718	-0.0831032	0.335713
BIOCARTA_CFTR_PATHWAY	-0.100308	-0.0249639	0.487351	0.207124	-0.241322	-0.120981	0.207479	-0.198005	-0.375163	-0.360835	-0.132642	-0.189405	0.163443	0.14611	-0.171129	0.361334	0.406809	0.290651	0.12641	-0.375362	-0.0215098	0.126879	0.00276006	0.0667702	-0.472046	0.00569418	-0.240181	0.215264	-0.259933	-0.102213	-0.264379	0.450808	-0.0731748	-0.0363713	0.11595	-0.0825109	0.0854249	0.0398116	-0.11732	0.0928138	0.0136813	0.130845	0.136632	0.115085	-0.41423	-0.357718	0.111017	0.134846	0.0225986
BIOCARTA_CYTOKINE_PATHWAY	-0.104362	-0.23283	-0.00827007	0.0358728	-0.177497	0.128959	-0.161434	-0.105359	0.22396	0.145692	0.0862785	0.118542	0.00971329	-0.0414164	0.108372	-0.0065469	0.420555	0.0570783	-0.15037	0.233849	0.0516513	-0.136763	-0.220697	0.281126	-0.152879	-0.036726	-0.287511	0.118123	-0.0458509	-0.223941	-0.013997	-0.329242	-0.332509	0.102035	0.371108	-0.319935	0.381783	0.0614754	0.317613	-0.214065	-0.215028	0.342416	-0.0302053	-0.294296	-0.0777482	-0.0512445	-0.224689	0.217858	-0.0142544
BIOCARTA_INFLAM_PATHWAY	0.123904	-0.253929	-0.136626	-0.0421166	-0.249388	0.205342	0.00547942	0.0975266	0.227181	0.0041919	-0.120681	0.056469	-0.197134	0.116459	0.102631	0.331357	0.314784	0.0488182	-0.295875	0.0480519	0.0235027	-0.283348	-0.398328	0.0720196	-0.162385	-0.100251	-0.197252	0.433822	-0.0489936	-0.258252	0.0647825	-0.432356	-0.453885	0.0420444	0.341169	-0.357865	0.237441	0.203513	0.143989	-0.0217937	-0.183931	0.442636	0.272974	-0.0982005	-0.294151	0.22117	-0.451746	0.366554	-0.0757662
BIOCARTA_D4GDI_PATHWAY	0.348549	-0.0939361	-0.0314221	-0.214497	0.540518	-0.412259	-0.485713	-0.234293	-0.033251	0.481846	0.266789	0.230805	-0.22702	-0.0481793	-0.311776	0.386862	0.270234	-0.26395	-0.15366	-0.0500821	-0.0657758	-0.0070574	-0.279549	-0.105107	0.099137	0.372325	-0.5285	0.378337	0.0523321	-0.0541459	-0.301387	-0.42546	0.353286	-0.401503	-0.122463	-0.330851	-0.282589	-0.386238	-0.0496716	0.0917673	-0.256871	0.0110242	0.05148	-0.184204	0.0570481	0.443159	0.355511	-0.0930303	-0.198736
BIOCARTA_DC_PATHWAY	-0.0280149	-0.239342	3.2e-05	0.119503	0.00198927	0.0226026	-0.178141	0.39475	0.0254197	-0.107381	0.017315	0.17164	-0.22476	-0.170347	-0.169725	0.247359	0.07612	-0.110862	-0.13381	0.276179	-0.0265183	-0.0224173	-0.34813	0.024124	-0.058509	0.17173	-0.310547	0.243431	-0.181035	-0.194785	0.186292	-0.177266	-0.444676	0.227514	-0.204714	-0.0989773	0.131378	0.00853788	0.408954	0.121582	0.112434	0.122388	0.342263	0.282868	-0.298542	-0.0197104	-0.501958	0.133804	-0.173791
BIOCARTA_P35ALZHEIMERS_PATHWAY	-0.43136	0.293183	-0.126937	-0.0243024	-0.2916	-0.136193	0.286328	0.0125348	0.112739	0.261348	0.556655	-0.0198444	0.198408	0.539171	0.487598	-0.34552	-0.19497	-0.122897	0.0412643	0.100175	0.108384	-0.254153	0.545659	0.56812	0.0350006	-0.0668139	-0.344299	-0.113212	-0.0327537	-0.224187	-0.0357305	-0.288886	0.00202055	0.0645124	-0.230869	-0.469791	0.0694138	-0.102778	-0.321861	0.112231	-0.469689	-0.335376	-0.134411	-0.455326	-0.0804927	-0.109977	0.502233	0.339475	-0.310935
BIOCARTA_RNA_PATHWAY	0.443171	-0.532962	-0.318982	0.254723	0.28519	0.123669	-0.204143	0.145314	0.291545	-0.0631446	-0.491545	-0.18699	0.5917	0.0707527	-0.279938	-0.0161601	0.308466	0.273207	0.0396895	0.0412862	0.161539	-0.438063	0.0439818	-0.312384	-0.363266	0.309518	-0.0825289	0.299577	-0.484144	-0.0934653	0.171058	-0.0361346	-0.387584	0.246436	0.419649	-0.276472	-0.400691	-0.432549	-0.420848	0.155369	0.189015	0.00516886	-0.270964	0.207401	0.0691698	-0.406798	-0.425937	0.312912	0.364192
BIOCARTA_MTA3_PATHWAY	0.0734267	0.539015	0.102425	0.204764	-0.0203925	0.0666404	-0.315262	-0.332023	-0.0386322	0.428549	-0.0834852	-0.0070072	-0.347286	0.270358	0.405863	0.127281	-0.320485	-0.48412	0.29839	-0.117767	0.156405	0.374966	0.337501	0.3652	0.303557	0.40251	-0.304648	-0.148353	-0.499026	0.138505	0.0242481	0.320487	-0.422848	-0.35281	0.0405607	0.236332	0.190448	0.0584488	-0.258393	-0.515113	0.104318	-0.211262	-0.320556	-0.391545	0.494008	-0.0418693	-0.163603	0.217765	0.164359
BIOCARTA_SKP2E2F_PATHWAY	-0.399213	0.0629805	0.392195	0.64398	0.121188	0.388501	-0.648228	0.119514	-0.498414	-0.287201	0.0101177	0.49041	0.386104	0.424544	-0.00922316	-0.0109695	-0.0339016	0.14252	0.442481	0.0951479	-0.163561	0.224822	0.0827328	0.369045	-0.52657	0.00011323	0.34256	-0.471888	0.0839933	-0.0910299	-0.132708	0.146065	-0.0723019	0.240248	-0.221125	0.0780526	0.0755152	0.428251	-0.250595	-0.527295	0.127924	0.00603582	-0.565867	-0.619011	0.341538	-0.21388	0.0830438	0.246547	0.231001
BIOCARTA_CALCINEURIN_PATHWAY	-0.279779	0.176044	0.338181	0.341173	0.36633	0.0837717	-0.21714	-0.171087	-0.567681	-0.0457767	-0.00566091	0.105052	0.423349	0.44667	-0.114264	-0.316821	-0.140851	0.388065	0.017093	-0.0044173	0.433059	0.0850072	0.532504	-0.0784269	-0.330601	0.00155071	-0.0260968	0.10609	0.27862	0.0441331	0.00718159	0.346828	0.0590898	0.0435278	-0.125609	-0.35558	0.00262789	-0.107581	-0.500281	-0.469124	0.26183	-0.240997	-0.256408	-0.526639	-0.147472	-0.37416	0.390396	0.219239	0.357876
BIOCARTA_EGF_PATHWAY	-0.305828	0.0682522	0.215773	0.0545271	0.010067	-0.00888613	0.126692	-0.260806	0.0129404	0.243887	0.203046	-0.290587	-0.0711424	-0.222645	-0.193898	-0.181247	0.0774748	-0.138042	0.0099157	0.080722	0.147732	0.100675	0.183727	-0.207744	0.276307	-0.00427854	0.07577	0.291391	-0.181734	-0.308121	0.138495	-0.126194	0.189035	-0.0458375	0.219653	-0.191109	-0.205478	0.0612506	-0.286179	-0.0597142	0.0335678	-0.389211	-0.165409	0.144121	-0.160916	-0.0244682	-0.206126	-0.292889	0.0343731
BIOCARTA_ETC_PATHWAY	0.0928024	0.289974	-0.406828	-0.101915	0.611583	-0.0762702	0.159145	0.412796	0.17413	-0.0848619	-0.277676	-0.0459777	-0.0280626	0.360642	-0.313889	0.556749	0.651546	0.203772	-0.115304	0.136262	0.36302	-0.227406	-0.17885	-0.366718	0.00768166	-0.0540941	0.0839431	-0.339152	-0.18895	-0.19413	-0.421505	-0.337146	-0.000233059	-0.327312	-0.134893	0.0888265	0.197532	-0.0875992	-0.121209	-0.299024	0.379904	-0.303417	0.204709	-0.541634	-0.129393	-0.234117	0.230802	0.0531271	0.294392
BIOCARTA_NDKDYNAMIN_PATHWAY	-0.376825	0.1998	0.0536151	0.489607	0.253803	-0.235508	-0.188627	-0.313984	-0.25055	0.18282	-0.0784815	-0.0270124	0.457705	0.451002	-0.274485	-0.140635	-0.159529	0.416935	-0.162577	-0.240415	0.199964	0.274662	-0.0752326	0.198803	0.0289516	0.0620666	-0.105942	0.19533	-0.0848443	-0.187278	0.122289	0.392686	0.108779	-0.307948	0.159644	-0.189616	0.0316682	-0.0930781	0.1153	-0.563501	0.309449	-0.234003	-0.414204	-0.200165	-0.556709	-0.614283	0.27616	0.313275	0.16442
BIOCARTA_EPHA4_PATHWAY	0.21624	0.377558	-0.423843	0.204743	0.271173	-0.445848	-0.26575	0.349129	0.190042	0.188925	0.157994	-0.000466207	0.458811	-0.159796	-0.0953304	-0.180566	0.0868902	-0.375711	0.285174	-0.318963	-0.399662	0.314638	0.109473	0.630884	0.0336536	0.0783947	0.431637	0.139873	0.18502	0.0985054	0.0366903	-0.00601097	0.0442824	0.219132	-0.0155175	0.0298045	-0.0764769	-0.184767	-0.0796296	-0.155896	-0.380185	-0.426639	-0.579634	-0.122948	0.0659162	-0.424865	0.0491008	0.173602	0.319306
BIOCARTA_EPO_PATHWAY	-0.349293	0.223979	0.156866	0.0482998	0.123287	-0.113709	0.0554021	-0.438755	0.0291344	0.111257	0.37261	-0.373729	0.106918	0.0990271	0.344159	0.0690086	-0.196715	-0.0201542	0.272531	0.164636	0.0125856	0.211726	-0.0436655	-0.0494121	0.215022	0.291306	0.0237266	-0.269883	-0.283749	-0.283111	-0.0189217	0.133447	0.261477	0.0801907	0.00996415	-0.159156	-0.221764	-0.163712	-0.280681	0.0556787	0.131843	-0.431176	-0.148461	-0.0106017	-0.0313374	-0.151152	0.179114	-0.350728	-0.0956907
BIOCARTA_ECM_PATHWAY	0.336666	0.122399	-0.169628	0.395493	0.410035	-0.222251	0.000679455	-0.378324	-0.0688967	-0.0109459	0.0847232	-0.304412	0.0194934	-0.0963601	-0.103745	-0.49682	-0.134528	-0.156747	-0.00632799	-0.0944368	0.182438	0.0412326	0.0751684	-0.0869935	0.142091	0.285128	0.311026	0.509198	-0.316231	0.0169028	-0.118647	0.0964746	-0.144868	0.355791	-0.0193278	-0.155411	-0.226994	-0.029827	-0.350607	-0.170131	-0.179367	-0.229417	-0.151586	-0.196233	-0.134864	-0.0236017	-0.194508	-0.00245614	-0.27225
BIOCARTA_ERK_PATHWAY	0.198405	0.0922815	-0.135358	0.219072	0.191311	-0.000774429	-0.20288	-0.366488	-0.120391	0.18727	0.168982	-0.141656	0.219882	0.15903	0.138587	-0.0469314	-0.168609	-0.210028	0.211662	0.130648	0.24539	0.269134	0.237919	-0.279646	0.0757336	0.144121	0.0933551	0.183357	-0.261365	-0.334496	0.0626301	0.142652	-0.130741	0.198616	-0.070559	-0.0853088	-0.21923	-0.170391	-0.209941	0.0146034	-0.169921	-0.243198	-0.0737953	0.0153395	-0.106741	0.106783	0.0438729	-0.126368	-0.0602685
BIOCARTA_ERYTH_PATHWAY	0.259849	-0.0885753	0.0676891	0.225457	-0.414349	0.0846325	-0.203159	0.416928	0.601127	-0.503173	0.146553	0.0273325	0.0319685	-0.167486	0.246728	0.482341	-0.181893	-0.088094	-0.43611	-0.126841	-0.0367141	-0.0557959	-0.443832	-0.274984	-0.282956	-0.196952	-0.080848	0.475965	-0.256763	-0.120005	0.10001	-0.589475	-0.661712	-0.00230728	0.508942	-0.132892	-0.162601	0.345487	-0.218581	0.158873	0.0193397	0.298541	0.361248	-0.230148	0.0276753	0.260159	-0.122403	-0.056506	0.0572308
BIOCARTA_EPONFKB_PATHWAY	0.146798	-0.150616	-0.335022	0.125341	0.236356	-0.480311	-0.210981	-0.0390996	0.281469	-0.331472	-0.547149	-0.199589	0.310733	0.134199	-0.31931	-0.184219	0.435482	-0.0565734	0.401509	-0.260151	0.22057	-0.227008	-0.498859	-0.296506	0.34167	0.379527	0.336936	0.207138	-0.359417	-0.193492	-0.228978	0.136051	-0.296601	0.245776	0.248458	-0.288393	-0.456554	0.000711969	-0.213849	0.614713	0.0817268	-0.157799	-0.224589	0.210056	-0.246261	-0.196317	0.137786	-0.0501395	0.138368
BIOCARTA_EIF_PATHWAY	0.636725	-0.234749	0.0286885	0.0462834	0.0733706	0.310558	-0.381921	0.558488	-0.476953	-0.420392	0.247241	0.298664	0.0265267	0.166828	-0.00795185	0.500694	0.0573384	0.393762	-0.651392	0.494526	0.264195	-0.00895838	-0.282777	0.131217	-0.531698	-0.239678	-0.0983961	-0.359943	-0.254812	-0.18497	-0.0902306	0.443241	-0.185805	-0.396147	0.503519	0.529522	-0.122384	-0.274019	0.0870528	-0.33919	0.578172	0.234846	-0.490242	-0.405857	-0.169087	0.151044	-0.272887	0.00767467	0.260786
BIOCARTA_EXTRINSIC_PATHWAY	0.574462	-0.306277	-0.3058	-0.2114	0.131547	-0.0162747	-0.265814	0.169099	0.522284	0.175219	-0.15923	-0.402371	-0.0287237	-0.373321	-0.379708	-0.0425725	0.139378	-0.275675	0.0102521	-0.0703891	-0.449232	0.549407	-0.132326	0.0619585	0.723127	-0.279439	0.0947054	0.512536	-0.311127	0.168945	0.0573894	0.0456397	-0.269137	-0.379948	-0.251085	-0.0729873	0.00712309	-0.133159	-0.314317	0.42676	-0.118305	-0.140863	0.0485263	0.698351	0.199655	0.132132	-0.113389	-0.502992	0.0945433
BIOCARTA_FAS_PATHWAY	0.0680558	-0.213694	-0.222474	0.0516491	0.0589536	-0.293487	-0.0603677	0.0800127	-0.065451	0.159579	-0.297334	-0.0107769	0.0535355	0.00176852	-0.0107813	0.0394151	0.264711	-0.265904	-0.0598724	0.192884	0.200934	-0.041644	0.0653067	0.00676707	-0.0921573	0.125692	0.279522	0.349152	-0.0960631	0.178153	0.24411	-0.287903	-0.13807	-0.111567	-0.0230109	-0.447297	-0.0719743	-0.0465073	-0.0943231	0.155617	-0.260955	0.195969	-0.0231933	-0.252448	0.107409	0.0397434	0.0160759	-0.196663	-0.159259
BIOCARTA_FCER1_PATHWAY	-0.269315	0.0287454	0.254286	0.182147	0.270261	-0.0234092	-0.175856	-0.260825	-0.306481	0.200523	0.194765	-0.1938	-0.0303482	-0.0371298	-0.110905	-0.197187	0.102751	0.310291	0.0964205	0.0419453	0.170994	0.128912	0.250499	-0.0295623	-0.0963917	0.157145	0.0367071	-0.0272688	-0.1788	-0.00728775	0.068328	0.255562	0.0138485	0.103845	-0.103661	-0.258573	0.0214971	0.077162	-0.165176	-0.322439	0.0390734	-0.185096	-0.277279	-0.268443	-0.126611	0.0239226	0.0714166	0.0716456	0.0450918
BIOCARTA_FEEDER_PATHWAY	0.0573091	0.113634	0.225623	-0.271662	0.044136	0.360655	-0.00766968	-0.0689787	0.297799	0.148362	-0.320776	-0.0432631	-0.304465	0.315095	-0.0227945	0.749734	-0.0590953	-0.0754677	0.288275	-0.274674	-0.264023	-0.0748073	-0.23741	0.425407	0.37702	-0.264559	-0.397464	-0.255154	-0.305156	0.210919	-0.104522	-0.255901	0.534188	-0.180793	0.235884	0.458376	0.302215	-0.378506	0.256867	-0.206369	-0.328313	0.146693	0.183492	-0.223971	-0.227837	-0.409003	-0.135868	0.472801	0.114558
BIOCARTA_FIBRINOLYSIS_PATHWAY	0.572897	-0.433328	-0.25847	-0.464454	-0.176061	-0.0984005	0.0130837	0.170028	0.581541	-0.52769	-0.404149	0.0562826	-0.0970476	0.16083	-0.251201	-0.517454	0.0234692	0.189331	-0.00824172	-0.498524	0.130067	0.462849	0.0831423	0.0854321	0.517546	0.133127	0.229816	0.653631	0.101343	0.154233	-0.0441569	0.144797	-0.245551	-0.45384	0.270505	-0.0588876	-0.335657	-0.203923	-0.241555	0.52251	-0.28267	0.0409565	-0.225483	0.531977	-0.0232734	-0.0980555	-0.0767426	-0.171686	0.102687
BIOCARTA_FMLP_PATHWAY	0.148109	-0.0867754	-0.0396958	0.197549	0.301927	-0.00265229	-0.113059	-0.247899	-0.228736	0.150018	-0.0486651	0.0714643	0.189687	0.0785772	-0.139863	-0.346306	0.126333	0.257538	0.177986	-0.157158	0.333166	0.0747317	0.225605	-0.0943987	0.00468131	0.263594	0.0161889	0.267709	-0.225229	-0.0602683	0.243088	0.199868	-0.193146	-0.0158852	0.0870334	-0.347088	0.0745067	-0.154628	-0.267295	-0.225063	-0.345992	-0.322397	-0.354342	-0.158386	-0.185403	-0.0711044	0.128405	0.129317	0.0681811
BIOCARTA_FREE_PATHWAY	-0.0297143	-0.241427	0.348688	-0.34114	0.271558	-0.196112	-0.0927832	-0.0549925	0.006509	-0.616868	-0.630465	-0.155775	-0.210851	-0.00918745	-0.0579106	-0.113197	0.468959	0.0670103	0.323878	-0.0587561	0.611607	0.258777	-0.0116889	-0.332274	0.485054	-0.0273532	-0.519521	0.206089	-0.386934	-0.209689	0.23231	-0.336656	0.0396261	0.182414	0.337491	-0.341481	0.201192	0.0563813	0.158344	-0.0104224	-0.0788341	0.0902038	-0.18106	0.332328	-0.383063	-0.164095	0.00266206	-0.102987	-0.346437
BIOCARTA_GABA_PATHWAY	0.0189625	0.184138	-0.0571954	0.153159	-0.0378648	-0.0669637	-0.51796	0.0829245	-0.0545539	0.170158	0.453138	0.576258	0.235212	0.11069	0.603713	-0.0314246	-0.29073	0.333206	0.337278	0.340248	-0.410834	0.225832	-0.211094	-0.450824	0.300627	-0.0232375	-0.234546	-0.433214	0.271553	0.194902	0.0403543	0.64469	-0.222962	-0.406419	0.442789	0.612143	0.0543399	-0.681091	0.430337	-0.548445	0.0678619	-0.145664	-0.628949	-0.0704753	-0.168091	-0.563905	0.285963	0.41218	0.204358
BIOCARTA_GATA3_PATHWAY	0.108667	0.087724	0.16531	-0.087984	-0.0924036	-0.0720281	-0.0974123	-0.034701	-0.401859	-0.119307	-0.134243	-0.155472	-0.307954	0.203851	-0.0442768	-0.0192412	0.347193	0.444491	0.160693	-0.108568	0.185696	0.128246	-0.267847	0.245414	0.0396988	-0.0211406	-0.0104255	-0.228886	-0.127049	-0.0175301	0.0404202	0.336502	-0.176751	0.0551289	0.0175548	-0.434035	0.1019	-0.147165	-0.0574185	0.0486379	-0.131049	0.0847388	0.214549	0.209511	-0.199889	-0.192633	-0.25959	0.11839	0.182937
BIOCARTA_GLYCOLYSIS_PATHWAY	0.522984	0.682323	0.431784	-0.0975945	0.213053	0.479817	-0.1712	-0.188571	0.3687	0.63505	-0.753879	-0.333655	-0.183214	0.476534	-0.579006	0.49731	-0.198752	0.437221	0.453629	-0.292103	0.204435	0.0760484	0.633668	0.286358	0.0508582	0.3622	-0.57102	-0.570704	-0.423365	-0.236856	-0.0945398	0.116566	-0.110367	0.0313174	0.222912	0.625082	0.142829	-0.0497916	-0.471341	-0.497726	-0.0262716	-0.235984	-0.196993	-0.458511	0.710621	-0.545392	0.0435424	0.247569	-0.526895
BIOCARTA_SET_PATHWAY	-0.0183728	-0.171201	-0.144956	-0.10877	0.0612756	0.169688	-0.2634	0.160752	-0.719736	0.23237	0.0959962	0.697367	0.0100963	0.150691	0.0779055	0.473095	0.268602	0.0251041	0.348867	-0.0546527	0.316089	0.135837	-0.361384	-0.326574	-0.310054	0.47317	-0.154682	0.0980415	-0.257582	-0.0424398	0.0329772	-0.0165843	-0.146187	-0.548745	-0.256281	0.43547	0.108146	0.128654	0.467981	-0.242628	0.074765	0.123258	0.0516011	-0.391182	0.247722	0.165371	0.0847213	0.153494	-0.328304
BIOCARTA_GH_PATHWAY	-0.221391	0.202843	0.221347	0.0537355	0.16825	0.175914	-0.0271333	-0.426707	-0.0184246	0.231472	0.18928	-0.35288	-0.0575342	-0.0941094	-0.0557937	-0.0460441	0.00553562	0.0831381	0.273779	0.102586	0.0101792	0.06536	0.0653754	-0.280717	0.0271388	0.0382658	-0.140723	0.0852664	-0.191722	-0.128602	0.0314766	-0.038073	0.219489	-0.00933813	0.176365	-0.0545571	-0.0445974	0.147253	-0.162648	-0.0927585	0.218826	-0.128159	-0.164613	0.123022	-0.171632	-0.181547	-0.0667606	-0.183321	-0.0834496
BIOCARTA_AHSP_PATHWAY	0.0943805	-0.293718	-0.123914	-0.337141	-0.317882	0.05952	0.346865	0.432728	-0.0220163	-0.0893174	-0.372644	-0.109692	-0.278057	-0.431222	0.32019	0.422289	0.601487	-0.408972	0.00999018	-0.062444	0.216376	-0.128525	-0.264756	0.0684293	0.293312	-0.468246	0.027714	0.290496	0.260891	-0.119289	0.0848118	-0.261953	-0.331903	-0.0312102	-0.0280542	0.297547	-0.00102055	0.24865	-0.0985154	0.131365	0.215577	0.462037	0.577201	-0.131805	-0.3825	-0.256862	-0.476238	-0.17389	0.0714524
BIOCARTA_TCAPOPTOSIS_PATHWAY	0.438659	0.236951	-0.350444	0.469488	-0.0492015	-0.0510358	-0.192948	0.519844	0.506332	-0.296751	-0.541055	-0.286844	-0.423221	-0.344597	-0.0877906	0.123644	-0.0319439	-0.161177	0.217885	-0.23562	0.340272	0.0822513	0.312251	0.295258	-0.284493	0.166757	0.576659	0.0677241	0.366638	-0.137096	0.0620709	-0.316688	-0.346118	-0.238006	0.713743	-0.417469	-0.51937	-0.407426	-0.640105	0.508221	0.354368	0.0787054	-0.289591	0.0995396	-0.236975	-0.224515	-0.162303	0.0590732	0.418649
BIOCARTA_HIVNEF_PATHWAY	0.0724705	-0.338657	-0.238838	0.129927	0.0569116	-0.160907	-0.0955672	-0.254325	0.135223	0.151382	-0.217711	-0.00907511	0.0776423	0.0179665	-0.0322223	-0.188682	0.392081	-0.221435	0.0480338	-0.0511103	0.175639	-0.0668074	-0.0920487	-0.0959878	0.021745	0.123584	0.252997	0.298413	-0.175759	-0.234396	0.308853	-0.267938	0.0337758	0.250271	-0.0410386	-0.394887	-0.100054	-0.114858	-0.343981	0.113871	-0.245352	0.224414	-0.0223391	-0.109176	0.306989	0.0839141	0.025824	-0.204073	0.0159419
BIOCARTA_SALMONELLA_PATHWAY	0.153245	0.224102	0.158308	-0.050422	0.371524	-0.434515	-0.027252	0.0260068	-0.0233599	0.588749	0.469831	0.139562	0.0518678	0.126158	-0.463841	-0.436612	-0.23247	0.109319	-0.47634	-0.525029	0.524477	0.451067	-0.191334	0.320374	-0.307925	-0.457273	0.145491	0.504679	-0.384509	-0.180555	0.243406	-0.237055	0.379303	-0.00642733	-0.0728487	-0.591859	0.264399	-0.450775	-0.360702	0.495914	-0.488641	-0.301504	0.418655	0.0346669	-0.475581	-0.0706923	0.239367	0.509097	0.241007
BIOCARTA_MPR_PATHWAY	-0.0760583	0.310152	0.15363	0.00187279	0.157909	-0.294162	-0.0961973	-0.27989	-0.282986	0.110351	0.224283	0.0586521	0.202665	0.386043	-0.25281	-0.219291	0.271551	0.147379	0.136469	-0.261563	0.363125	0.155334	0.110801	0.0744621	-0.185282	-0.18607	-0.163103	0.0672532	0.0635828	-0.0610579	-0.10193	-0.059246	0.105802	0.297777	-0.364044	-0.488046	0.271397	-0.213705	-0.223065	0.0176494	-0.32636	-0.21917	-0.0164395	-0.322722	-0.0585165	-0.4112	0.194411	0.100567	0.246719
BIOCARTA_HCMV_PATHWAY	-0.00128194	0.0400225	0.325972	0.239286	0.13781	0.0785273	0.105185	-0.0393148	-0.106704	-0.0109776	-0.0290662	-0.159041	0.062736	-0.290238	-0.336048	-0.208765	-0.0430256	0.214586	0.0822137	-0.0202431	0.156455	-0.190213	0.284342	-0.294024	-0.0981215	0.122702	-0.0931157	0.236426	-0.0100936	0.239708	-0.182419	0.240912	-0.191101	-0.0528212	0.343039	-0.0549673	-0.180537	-0.00627611	-0.323058	-0.33495	-0.327568	-0.310242	-0.471506	-0.102425	0.0143947	0.0166603	-0.268453	0.0211293	-0.225119
BIOCARTA_P53HYPOXIA_PATHWAY	0.0138802	-0.0565771	-0.160357	0.0653008	-0.32189	0.110144	-0.0557816	-0.0894708	0.213126	0.156832	-0.525864	-0.0160592	0.307584	0.172998	0.204763	0.147961	-0.137387	-0.136083	0.0592646	-0.151427	0.206599	0.0227139	0.31126	-0.223197	0.164766	0.0495387	0.116474	-0.0146966	-0.00196048	-0.132793	0.113993	-0.219072	-0.336288	0.0571964	0.189312	-0.150195	-0.0853794	0.126392	-0.352591	0.0312202	-0.0585491	0.171999	-0.325113	0.0821222	0.237329	-0.153872	-0.212315	-0.0988016	0.322824
BIOCARTA_HIF_PATHWAY	0.47673	0.101552	0.0602699	-0.0991776	0.0588283	-0.0516436	-0.0933959	0.105282	0.0682964	0.0668464	-0.13207	0.278862	-0.0174934	0.3595	0.1061	0.182592	0.0589119	0.216532	-0.460438	0.273871	-0.0851067	0.212803	-0.126699	-0.344765	0.288985	0.12525	0.103694	-0.0268532	-0.214097	0.0872774	-0.516377	0.250897	-0.530868	-0.0970804	0.0668688	0.325294	-0.316036	0.148176	0.185975	-0.25912	0.0776862	0.00583791	-0.118348	0.479577	-0.250911	-0.0831033	0.208092	-0.0496882	-0.339563
BIOCARTA_IGF1_PATHWAY	-0.373279	-0.210803	0.175175	0.0586632	0.0754125	-0.0487392	0.159223	-0.321427	0.019436	-0.221677	0.32017	-0.065726	-0.251192	-0.321129	0.032199	-0.102543	-0.121194	0.106289	-0.00768577	0.148294	0.149726	0.313768	-0.169476	-0.121547	0.116852	0.178391	-0.084347	-0.0709527	-0.219727	-0.326623	0.0505322	-0.0163741	0.152855	0.0307422	0.409142	-0.131664	-0.1112	0.138056	0.000121848	0.15084	0.0131807	-0.351069	-0.17505	0.1599	-0.0246971	-0.108896	-0.0745751	0.00676186	0.109076
BIOCARTA_IL17_PATHWAY	-0.183853	0.413723	-0.204965	0.467543	0.0190243	0.236883	0.150126	0.411645	0.263872	-0.354223	-0.0546242	-0.453438	-0.248274	-0.077887	-0.219074	0.2573	-0.0849495	-0.269292	0.202923	0.0301474	0.199704	0.118807	0.0466213	-0.0587918	-0.20092	-0.235243	0.307103	0.275563	0.154233	-0.336372	0.0341531	0.0889084	-0.319836	-0.251002	0.605385	-0.272	-0.408931	-0.333321	-0.522012	0.0191028	0.337314	0.0716118	0.0783123	0.0451747	-0.304529	-0.175004	0.06616	-0.0440899	0.240137
BIOCARTA_IL2_PATHWAY	-0.0664755	-0.00190901	0.118911	-0.0542396	0.298108	-0.213304	0.0879199	-0.395239	-0.0318756	0.371428	0.304215	-0.122045	-0.187355	-0.156519	0.148921	0.0476303	-0.179122	-0.0489595	0.100095	0.139558	-0.0610352	0.0990828	0.115491	-0.120835	0.274017	0.4053	-0.257718	-0.112766	-0.361252	-0.21342	0.0871677	0.210456	0.0454949	-0.112118	-0.0850847	-0.22642	0.0643497	-0.184619	-0.24851	-0.165957	0.0662781	-0.31388	-0.0939204	0.236014	0.11602	-0.130479	-0.142026	-0.301795	-0.33214
BIOCARTA_IL3_PATHWAY	-0.287694	0.100705	0.266852	0.230742	-0.117327	-0.265414	-0.0760984	-0.249547	0.00380452	0.119095	0.272355	-0.481997	-0.253525	0.100787	0.157697	0.0251436	0.0531274	-0.15588	0.342853	0.193554	-0.0782208	0.336613	0.0500248	-0.175179	0.311646	0.266603	0.273333	0.0570592	-0.0563311	-0.282886	0.14534	0.0768502	0.196837	0.143665	-0.201235	-0.122467	0.0504522	-0.266779	-0.328115	-0.0317789	-0.0714276	-0.381507	0.298934	0.186346	0.110368	-0.317829	-0.0236026	-0.398862	-0.038195
BIOCARTA_IL4_PATHWAY	-0.0201344	0.137764	0.320176	-0.100589	-0.140362	-0.338639	0.136876	0.339628	-0.19223	0.0277211	-0.547723	0.249814	-0.29145	0.0960046	-0.342294	-0.392613	0.0654563	-0.589612	0.196688	-0.147179	-0.0350954	-0.485807	0.4207	-0.170943	0.430574	0.263937	0.140161	0.243587	-0.466517	-0.555276	0.384563	0.00981067	-0.0137727	-0.0150726	0.225652	0.0104682	-0.0586354	-0.351662	-0.242472	0.552477	0.281428	0.348207	0.265308	-0.187301	-0.109404	-0.326189	-0.490395	0.0809989	-0.31736
BIOCARTA_IL5_PATHWAY	0.00247947	0.360367	-0.430762	0.255966	0.279499	0.0272873	-0.189085	-0.186301	0.216479	0.206707	-0.00813333	0.277266	-0.203613	-0.342043	-0.144852	-0.11624	0.226772	-0.0172826	0.143935	-0.128852	0.211095	-0.0560711	-0.476099	0.128001	-0.0698602	0.150664	-0.00907398	0.00983517	0.165522	-0.432894	0.0153214	0.0892603	-0.442744	0.19152	0.373463	-0.440787	-0.0586916	-0.332618	-0.151349	0.113684	-0.256754	0.516908	0.120562	-0.279303	-0.632047	0.2585	-0.147889	0.109662	0.33843
BIOCARTA_IL6_PATHWAY	-0.0803615	0.0318965	-0.0250337	0.00181326	0.0273013	-0.183782	0.0474325	-0.0062041	0.0897293	-0.0132914	0.192932	-0.338926	-0.153542	-0.20344	-0.119664	-0.0870351	-0.0810618	-0.126824	0.0152587	0.116178	0.218522	0.184982	-0.336353	-0.268616	0.357555	0.229853	-0.127171	0.177808	-0.44258	-0.38246	0.276081	-0.154034	-0.0579514	0.011667	0.411914	-0.275855	-0.0200336	-0.268079	-0.331931	0.217187	-0.149909	-0.0495832	-0.0210372	0.212963	-0.235218	0.111978	0.0990089	-0.0711269	-0.0831963
BIOCARTA_IL10_PATHWAY	0.279045	0.277434	-0.0797291	-0.145233	-0.0398634	0.0417306	0.112712	-0.126603	0.435777	0.459377	-0.208302	-0.457175	-0.221927	0.328741	-0.512288	-0.04425	0.273491	-0.575396	-0.0404884	0.0141961	-0.0762955	-0.0419077	0.399399	-0.503256	0.493554	-0.0217182	0.0243426	0.5675	-0.444665	-0.230969	0.108275	-0.403727	0.0213502	-0.161701	0.381599	0.0760464	0.0914426	-0.314599	-0.265342	0.159697	-0.259041	0.0980461	-0.0123336	0.2976	-0.429618	0.0403028	-0.00798031	-0.353743	-0.217975
BIOCARTA_IL12_PATHWAY	0.0801903	0.320174	-0.0747639	0.316732	-0.202294	0.248	-0.0843546	0.25637	0.204028	-0.0154653	-0.172688	-0.136062	-0.191786	-0.142429	-0.0813975	0.1523	0.109638	-0.144115	0.0579054	0.223217	0.238639	-0.196462	0.177212	0.0528718	0.0288802	-0.113938	0.107233	0.0693964	0.109812	0.167044	0.0224494	-0.0876675	-0.288055	-0.454501	0.474236	-0.360635	-0.249061	-0.309329	-0.134671	0.160781	0.0821744	-0.205433	-0.426333	0.0225756	-0.292543	-0.110561	0.116849	0.175451	-0.161512
BIOCARTA_IL2RB_PATHWAY	0.0305732	0.136024	0.00572154	0.183488	0.348342	-0.102559	-0.242171	-0.205401	-0.147932	0.25184	-0.134176	-0.16508	-0.0362122	0.200812	0.0459906	-0.246168	0.100333	-0.166589	0.187392	0.193518	-0.00234974	0.0091869	0.161083	-0.0616701	-0.000786043	0.182154	-0.0217296	0.0609863	-0.284423	-0.0209971	0.0193062	0.0837725	0.110781	0.0631688	-0.0101481	-0.13121	-0.0121344	0.0665029	-0.361221	-0.0593058	0.086223	-0.0602783	-0.334674	-0.0178232	-0.108444	-0.14227	-0.266668	-0.0382453	-0.19723
BIOCARTA_IL22BP_PATHWAY	0.247629	0.449083	0.272517	-0.115563	-0.133965	-0.354666	-0.200075	-0.187946	0.0428031	0.44987	-0.407089	-0.24505	-0.018275	0.440173	-0.214649	0.0328083	0.0575602	-0.4799	0.420011	0.372329	-0.189277	-0.403833	0.398773	-0.476099	0.428644	0.0239135	0.0686478	0.326731	-0.285289	-0.103528	0.191452	-0.175993	0.256145	-0.213503	-0.0136117	-0.278797	0.233416	-0.289742	-0.291097	0.198798	-0.150301	-0.216801	0.0247572	0.0830845	-0.398055	-0.0339891	-0.0200733	-0.265849	-0.468201
BIOCARTA_IL7_PATHWAY	0.155692	-0.0867927	0.235679	-0.0249839	0.284533	-0.417224	-0.242417	-0.415587	0.10358	0.310685	-0.109227	-0.0235036	-0.0489932	0.286275	-0.258149	-0.0798061	-0.0342743	-0.171649	0.0595415	0.115934	0.15135	-0.317941	0.352421	0.0356809	-0.104631	0.147991	-0.0770629	0.458705	-0.305599	-0.0809507	0.234827	0.0448146	0.265644	0.000267801	0.0645672	-0.0980325	0.073535	0.252453	-0.205876	0.150029	-0.200356	-0.235047	-0.330765	-0.0381639	-0.124305	-0.119044	-0.399922	-0.118146	-0.231246
BIOCARTA_GSK3_PATHWAY	0.333717	-0.210003	0.161569	0.144202	0.162684	-0.0155876	0.249539	0.127503	0.157658	0.054111	0.17837	0.0738745	0.284506	-0.144012	-0.31783	-0.218209	0.0216353	0.0538065	0.420038	-0.142172	-0.0178791	0.0892694	0.0220182	0.0693994	-0.161242	-0.154772	0.0151177	0.373212	-0.482559	-0.503234	0.000263252	-0.250025	0.414854	-0.112327	0.168157	-0.245304	-0.266303	0.0393781	-0.337744	-0.0148807	-0.0669607	-0.00688356	-0.184435	0.0390081	-0.229084	-0.171929	-0.133441	-0.266111	0.0698785
BIOCARTA_DEATH_PATHWAY	0.429823	-0.365151	-0.169755	-0.0222029	0.196846	-0.0712866	-0.110963	-0.174772	0.342806	0.182866	-0.101312	-0.302292	0.0819021	-0.0596176	-0.24491	-0.187084	0.47262	-0.136855	-0.146663	-0.0485473	-0.0100378	-0.109696	-0.2655	-0.0627127	0.23792	0.098004	0.0777103	0.400449	-0.298698	-0.373512	0.375758	-0.502778	-0.0718646	0.0916944	-0.0254359	-0.538441	0.152152	-0.33549	-0.478188	0.337392	-0.19969	0.217558	0.182263	-0.0780687	0.336983	0.10823	0.311708	-0.389066	0.0163705
BIOCARTA_RACCYCD_PATHWAY	0.336089	-0.245745	-0.128443	0.429947	0.308574	0.0370665	-0.0186469	-0.112368	-0.144126	-0.0304904	-0.101725	0.109462	0.364873	-0.0694512	-0.188798	-0.385755	0.251528	0.251472	0.19046	0.187666	0.196177	0.127575	0.193673	-0.0206618	-0.470715	0.250655	0.366877	0.355034	-0.232016	-0.198973	0.0720105	0.159302	-0.198854	0.252014	0.13487	-0.168113	-0.122135	0.233107	-0.586712	-0.357668	-0.0987284	-0.18666	-0.467943	-0.366299	0.047924	0.0131581	-0.227015	-0.0712994	0.0613296
BIOCARTA_GLEEVEC_PATHWAY	-0.381673	0.0536197	0.118065	0.351635	0.232734	-0.192143	-0.142774	-0.372271	-0.140729	0.211243	0.158631	-0.258968	0.144665	-0.00798093	0.123835	-0.103443	0.200464	0.12338	0.103696	0.238857	0.152384	-0.0629401	0.256956	-0.158349	0.0279156	0.0253097	-0.140206	-0.0579538	0.00612045	-0.0763362	-0.162617	0.155964	0.259023	0.192074	0.0668544	-0.10049	-0.168342	0.0618175	-0.182037	-0.080403	-0.138727	-0.459678	-0.365562	0.0409426	-0.0829664	-0.223632	-0.104855	0.0623642	0.0522612
BIOCARTA_INSULIN_PATHWAY	-0.393591	-0.190686	0.198606	0.201017	0.224052	-0.0323052	0.239853	-0.319871	-0.0324118	-0.106946	0.241174	-0.203944	-0.193607	-0.380154	-0.0144776	-0.197745	-0.07183	0.145869	0.0572784	0.16641	0.00629529	0.315564	-0.148939	-0.0520693	0.109418	0.256715	0.00606288	-0.131249	-0.278743	-0.251676	-0.0264858	0.0446373	0.152383	0.0915644	0.330891	-0.135706	-0.115565	0.0361241	-0.100772	0.218544	0.0398886	-0.287455	-0.387757	0.102909	-0.0931721	-0.0595606	-0.139827	-0.0784639	0.0593958
BIOCARTA_INTEGRIN_PATHWAY	0.078502	0.132548	-0.0658626	0.142421	-0.0800128	-0.0944488	0.176202	-0.313686	-0.265725	0.200765	0.101724	-0.0135878	0.195739	0.0805195	-0.0449252	-0.221431	0.181173	-0.107875	-0.0483003	0.0725106	0.125183	0.14964	-0.0172541	-0.176917	0.17376	0.137504	0.240826	0.349729	-0.383816	0.144278	0.240255	-0.00180921	-0.357651	-0.0938508	-0.0139525	-0.0324462	-0.0191992	-0.248363	-0.216408	-0.0052543	-0.0369747	-0.011673	-0.00231375	-0.286474	-0.13844	0.175595	-0.101356	-0.185542	-0.175194
BIOCARTA_INTRINSIC_PATHWAY	0.348651	-0.341222	-0.268936	-0.0711105	-0.0357125	-0.131121	-0.0413995	0.384534	0.432639	0.00469674	-0.267643	-0.23405	0.0687562	-0.130218	-0.357741	0.0907004	0.303448	-0.127935	-0.0322566	-0.195662	-0.301947	0.391719	-0.162338	0.11447	0.529008	0.12928	0.177452	0.30271	-0.157047	-0.0600056	-0.0620091	-0.130942	-0.208747	0.196282	-0.231258	0.0820808	-0.0895223	0.0730521	-0.343126	0.352611	-0.346338	0.102858	0.28639	0.481716	-0.0765817	0.112824	0.256152	-0.263843	-0.0255962
BIOCARTA_KERATINOCYTE_PATHWAY	0.0659695	-0.289338	-0.119192	0.122721	0.280494	0.189186	-0.176516	-0.164262	0.212018	0.169939	0.0568695	-0.279615	-0.0160156	-0.0761606	0.174659	-0.0073773	0.353996	0.0896204	0.171989	-0.00320543	0.307945	-0.173684	-0.241401	0.102936	0.313117	0.219264	-0.040166	0.13723	-0.413437	0.030972	0.0129232	-0.246046	-0.235139	0.0996193	0.0153038	-0.338325	-0.166096	0.210071	-0.319874	-0.0278068	-0.339926	-0.281871	-0.334338	0.189109	0.104744	-0.0269938	-0.187867	-0.219034	-0.094534
BIOCARTA_TCRA_PATHWAY	0.102578	0.394504	-0.170439	0.223624	0.0702936	0.0836167	-0.343814	0.315061	0.0622549	0.158567	0.121212	0.000865472	-0.270783	-0.100728	0.00940755	0.156759	-0.0973691	-0.502909	0.327479	-0.00052852	0.329387	-0.200946	0.190784	0.357386	-0.0375833	-0.0936225	0.318576	0.0321772	0.634138	-0.0192389	-0.238463	-0.12697	-0.166368	-0.231311	0.495903	-0.348733	-0.172777	-0.29566	-0.59359	-0.0568268	0.0107289	0.223514	-0.164085	0.127661	0.135561	-0.339878	-0.00346522	0.121928	0.264167
BIOCARTA_LECTIN_PATHWAY	0.0832766	0.0292104	0.147358	0.193864	0.0875751	0.550543	-0.0200903	0.506596	0.26466	-0.455524	-0.349821	-0.442666	-0.0617886	-0.323636	-0.409371	-0.480304	0.454091	-0.183076	-0.255598	-0.0989148	0.181681	0.468864	0.263326	-0.390884	-0.205482	0.0539326	-0.0136343	0.361637	-0.152957	-0.532229	-0.367015	-0.532436	-0.0696654	0.511567	0.441213	0.505742	-0.320608	-0.289043	0.10101	-0.240285	0.0837782	0.163475	0.241876	0.269862	-0.229571	-0.282669	0.0561546	-0.397491	0.37065
BIOCARTA_PYK2_PATHWAY	-0.226977	-0.0138095	0.219875	0.247901	0.205522	0.189037	-0.3473	-0.346956	-0.368868	0.293436	0.219408	-0.0790416	0.204065	0.11027	0.193642	-0.221918	-0.0202893	0.199242	0.122305	0.0455152	0.017243	-0.042994	0.229245	-0.203958	0.0463238	0.0700542	-0.154364	0.0746974	0.0113233	0.122898	0.182532	0.115455	-0.0407441	0.0504332	0.109366	-0.243455	-0.221094	0.134064	-0.337633	-0.354571	-0.147485	-0.399675	-0.306511	-0.184364	-0.222387	-0.248292	0.0431579	-0.05221	0.020496
BIOCARTA_EGFR_SMRTE_PATHWAY	-0.27266	-0.018546	0.192475	0.181785	0.29949	0.453924	-0.0389545	-0.0213347	-0.421528	0.292922	-0.00926784	0.0140096	0.307818	-0.360526	0.117315	0.256288	0.161083	-0.0886898	0.166247	-0.157746	0.422512	0.345593	0.353459	-0.287916	-0.0523981	-0.296532	0.0623143	0.72765	-0.172219	-0.319168	-0.0529805	-0.121843	-0.171733	-0.343639	0.223966	0.00536498	-0.443885	0.29955	0.25603	-0.34009	-0.267701	-0.163746	-0.354989	0.248532	-0.35266	0.123418	-0.323449	-0.0449441	-0.328398
BIOCARTA_MAPK_PATHWAY	0.0650522	0.0845266	-0.0465025	0.0560333	0.137754	-0.0475203	0.0160093	-0.0596404	0.0884735	-0.0398855	0.0485249	0.0720568	-0.029205	-0.0856359	0.0877457	0.0233918	-0.0141462	-0.16826	0.0730197	0.0758782	0.0304778	-0.0839411	0.00360714	-0.227922	0.0150183	0.0819613	-0.0142761	0.182817	-0.194305	-0.195282	0.178519	0.0455089	0.0677463	0.0583157	0.0750192	-0.182919	-0.238204	-0.0548059	-0.226802	0.15333	-0.189492	-0.267584	-0.0545256	-0.0463854	0.0250514	-0.0628989	-0.206707	0.05482	-0.048564
BIOCARTA_MCALPAIN_PATHWAY	0.243206	0.200824	-0.0627148	0.184149	-0.180561	-0.428552	0.195803	-0.15089	-0.176033	0.017215	0.139593	-0.291193	-0.0783105	0.181706	-0.404151	-0.344892	0.241845	0.10816	0.236687	-0.0508227	0.337768	-0.198034	-0.0669883	0.22505	-0.0544513	0.115294	0.146376	0.45208	-0.234255	0.19855	0.0125394	0.0913155	-0.170124	0.209916	-0.14461	-0.211956	-0.103109	-0.236814	-0.255115	0.255968	-0.254901	-0.288062	-0.0233181	-0.153804	0.0308987	-0.0251204	-0.0322146	0.149432	-0.199799
BIOCARTA_PPARA_PATHWAY	-0.122933	0.0518915	0.173313	0.0879676	0.0552095	-0.0763049	0.107434	-0.0859505	0.091444	-0.182457	-0.130937	0.0658336	-0.0313178	0.171918	0.0260061	0.00403657	0.0923563	0.148641	0.125746	0.0751628	0.125559	0.0315228	0.0584785	-0.278228	-0.00346371	-0.139048	-0.200682	0.304339	-0.20747	0.0206092	-0.126428	-0.151329	0.0900542	0.111548	0.211835	0.166991	-0.131081	0.314364	-0.209402	-0.127295	-0.0872659	-0.149064	-0.321608	0.279663	-0.261423	-0.136966	0.0167628	0.0916041	0.0120113
BIOCARTA_ETS_PATHWAY	-0.32122	-0.0479539	0.00384082	0.285017	0.20859	0.23245	0.0284248	-0.139916	-0.152632	-0.32788	0.498417	0.0997923	-0.0594077	0.273935	0.407501	0.171939	-0.371522	0.279703	0.379521	0.381724	0.410453	-0.0353727	-0.242183	-0.170471	-0.323971	0.127359	0.371579	-0.188719	-0.0362718	0.111662	-0.362203	-0.0356644	-0.309628	-0.0972533	-0.131956	0.229359	-0.0845094	-0.218407	0.152479	-0.390905	0.278251	-0.308568	-0.341077	-0.064909	0.143995	0.0484776	-0.0620868	-0.145588	0.162768
BIOCARTA_MONOCYTE_PATHWAY	0.51516	0.00445801	-0.15383	-0.0479178	0.417039	-0.0730327	0.29405	0.307177	0.539277	0.132589	-0.327906	-0.3936	-0.25287	-0.100022	-0.333534	-0.348259	0.370111	-0.176241	-0.232865	0.060913	0.192823	-0.147218	-0.389178	-0.340048	0.117097	0.205257	0.373745	0.509709	0.0230763	-0.409707	-0.134873	-0.237927	-0.301581	-0.242493	0.282377	-0.180547	-0.138914	-0.298297	-0.238045	0.106711	0.00864791	0.372359	0.423906	0.258023	-0.316857	0.148427	-0.0391242	0.232659	-0.20952
BIOCARTA_MTOR_PATHWAY	0.164227	-0.149596	-0.193165	0.296459	-0.315886	0.0834639	0.406435	0.150587	-0.0935629	0.00197985	0.273814	0.21518	-0.215263	0.342058	0.120835	-0.0166549	-0.182637	0.14206	-0.468358	0.0772289	0.235556	-0.35301	-0.154168	-0.174783	-0.334005	0.0691364	0.20834	-0.0349424	-0.149495	-0.17436	-0.212162	0.37141	0.0997596	-0.0520823	0.216083	0.259174	-0.28505	0.170939	-0.140508	0.272834	0.476499	0.11628	-0.27354	-0.471192	0.11959	0.229794	-0.199212	-0.057324	0.0986155
BIOCARTA_IGF1R_PATHWAY	-0.0108807	0.0567146	0.213021	0.248253	0.0528071	-0.117813	-0.0485416	-0.506646	-0.390606	-0.108813	0.242014	-0.108878	-0.00226526	0.0846457	0.0128611	-0.321372	0.0637099	0.20915	0.307547	-0.17139	0.142468	0.039563	0.0555593	-0.0777483	-0.201531	0.203603	-0.213598	-0.062473	-0.0621548	-0.0864661	-0.265533	0.275767	0.170474	0.296954	0.0268121	-0.208707	-0.0187921	0.196518	-0.176992	0.0622692	-0.140319	-0.238758	-0.157722	0.0329419	-0.0763367	-0.207242	-0.00219999	0.126548	0.0743407
BIOCARTA_PITX2_PATHWAY	0.334959	-0.263825	0.202398	-0.134592	-0.428907	0.124904	0.260216	-0.0913816	-0.406427	0.00728333	-0.0280604	0.521888	0.0723507	0.436907	0.456678	0.0163245	0.317115	0.0831231	0.402899	0.307217	0.322822	-0.125854	-0.138031	-0.113773	-0.374798	-0.0643275	0.295783	0.135288	-0.64869	-0.370711	0.306058	-0.144785	0.0883524	-0.0800529	-0.0184688	0.0831441	-0.460178	-0.41717	0.148254	-0.309815	0.406758	0.0712501	0.125799	-0.1834	-0.24196	-0.0285197	-0.610782	-0.142947	0.0645253
BIOCARTA_NGF_PATHWAY	-0.367363	-0.286375	0.186528	-0.0160341	0.0678144	-0.0361732	0.102786	-0.402615	-0.0252901	0.0952726	0.28064	-0.2962	0.108398	-0.00543305	0.31113	0.0396314	-0.074449	0.0642153	0.11197	0.14579	0.294398	0.235201	0.120483	0.0452228	-0.115506	0.0621306	0.0109885	-0.137935	-0.271476	-0.318163	-0.184926	0.156609	0.31002	0.333087	0.168731	-0.170162	-0.0127059	0.0367569	-0.14971	-0.261536	0.0921206	-0.431677	-0.368991	-0.0883782	-0.16142	0.0173426	0.210718	-0.0749748	-0.0963628
BIOCARTA_VIP_PATHWAY	-0.0167146	-0.232145	0.0172626	0.260592	0.176319	-0.161309	0.00217255	-0.193916	-0.189575	-0.263359	-0.118164	-0.0214856	0.363115	0.218475	-0.266838	-0.296197	0.320845	0.364299	-0.0028496	-0.114617	0.465356	-0.157888	0.0720753	0.0763824	-0.363646	-0.256933	0.0710886	0.157627	-0.0942144	-0.174629	0.149586	-0.153908	-0.0923537	-0.0110248	0.219271	-0.501299	-0.00450867	-0.157911	-0.307055	-0.0638174	-0.121108	-0.0116747	-0.185567	0.0515706	-0.0514801	-0.347792	0.218071	0.238569	0.282813
BIOCARTA_NFAT_PATHWAY	-0.189697	0.140743	0.0295479	0.172372	-0.000338959	-0.0689239	-0.0044771	-0.0318419	-0.3217	-0.0167257	0.0837811	-0.0977257	0.0943992	0.113397	-0.0479999	-0.00464084	0.0822142	0.341051	0.0177723	0.0811796	0.172678	0.117627	0.0746918	0.0347502	0.0258755	-0.0842699	-0.0238534	0.165312	-0.206212	0.00175869	0.168405	0.31548	-0.00729169	-0.235456	0.105904	-0.18587	0.134509	0.0735327	-0.28075	-0.112352	-0.184907	-0.0647511	-0.129239	-0.0789855	-0.0994413	-0.196318	0.0897155	0.14603	-0.00188171
BIOCARTA_NTHI_PATHWAY	0.0849223	-0.157417	-0.0846862	-0.0396528	0.0900813	0.285256	0.116661	0.0236939	0.30844	-0.148532	-0.376103	-0.0143283	-0.0634502	-0.024699	-0.0680576	-0.147007	0.372649	0.0249299	-0.179509	0.228477	0.176373	-0.33319	-0.0787077	-0.219178	-0.261701	0.0102655	0.0799475	0.395125	-0.153701	-0.17056	0.0183592	-0.0533113	-0.00872737	-0.113559	0.368283	-0.289455	-0.302769	-0.053971	-0.377992	0.286821	-0.410253	0.0716581	-0.149314	0.37809	-0.119649	0.174019	-0.282982	-0.0394055	-0.156442
BIOCARTA_NFKB_PATHWAY	0.312122	-0.549915	-0.298191	0.0359613	0.0869406	0.0103236	0.236664	-0.175738	0.570632	-0.198981	-0.209395	-0.150903	-0.00264795	-0.279772	-0.269107	-0.0525814	0.549935	-0.0639544	0.126672	-0.305917	-0.00167403	-0.290986	-0.316842	-0.125182	0.116786	-0.17513	0.109808	0.462833	-0.23678	-0.177624	0.115581	-0.401502	0.00190737	-0.070405	0.00156625	-0.36195	-0.167262	0.117312	-0.362301	0.373031	-0.401123	0.32209	-0.0779022	0.146158	-0.023784	0.0521614	-0.10027	-0.229253	0.0837312
BIOCARTA_NOS1_PATHWAY	-0.231192	0.182859	0.241454	0.254041	0.244621	-0.0496113	-0.0845275	-0.22682	-0.300406	0.0128413	-0.0893785	0.143374	0.303509	0.51756	-0.128268	-0.151952	0.0127958	0.427053	-0.0388198	-0.439501	0.120178	0.164491	-0.0555023	0.250077	-0.202519	-0.133117	-0.284011	-0.163085	-0.255071	0.192605	-0.160859	0.26907	-0.0250092	-0.188804	0.0858923	-0.197671	0.0180296	0.204143	-0.0193003	-0.378479	0.140712	-0.123302	-0.167566	0.0429178	-0.341287	-0.361964	0.223108	0.369324	0.247749
BIOCARTA_NO2IL12_PATHWAY	-0.106385	0.580332	-0.20616	0.411556	-0.162319	0.387883	-0.0687337	0.373614	0.143562	-0.39306	-0.226748	-0.40083	-0.268661	-0.0308629	-0.0836267	0.296286	0.100963	-0.354095	0.441163	0.232238	0.240188	-0.116816	0.249586	-0.0414085	-0.350319	-0.223828	0.146582	0.155342	0.325388	-0.111253	-0.0998016	-0.081796	-0.422569	-0.515647	0.523927	-0.210243	-0.263574	-0.174379	-0.176735	0.103517	0.570128	-0.260498	-0.213656	-0.020866	-0.461926	-0.0951317	0.0612582	0.247311	-0.0557541
BIOCARTA_RARRXR_PATHWAY	-0.499067	-0.00928275	0.264549	0.0498454	-0.12627	0.235768	0.123715	-0.0145473	-0.418075	-0.277045	-0.274606	-0.210561	-0.255855	-0.081139	-0.0356373	-0.285361	-0.10139	-0.108204	0.210919	-0.0503643	0.336889	0.0106928	0.313219	-0.344394	-0.295283	0.286753	0.567257	0.307156	-0.454868	-0.15399	0.462901	-0.212152	-0.0597842	0.195925	0.440275	0.198562	-0.0612415	-0.409041	0.0758703	-0.069014	0.137712	0.520843	-0.0246919	0.0513194	-0.40074	0.111514	-0.478905	-0.16735	-0.307993
BIOCARTA_NUCLEARRS_PATHWAY	0.463976	0.294985	-0.116517	-0.115997	0.121234	-0.289695	-0.0574635	0.0629781	0.555612	0.328652	-0.415722	-0.0878551	-0.304492	-0.196594	0.0577919	0.045776	-0.272075	-0.124547	0.232778	-0.462284	0.0183739	0.184971	0.105223	-0.112276	0.386637	-0.00563844	-0.345509	0.536049	-0.264744	-0.0737517	-0.196293	-0.041086	-0.42394	0.176424	0.272214	0.0484197	-0.0728885	-0.306201	-0.367465	0.0844385	0.091616	0.218114	-0.322916	0.252393	0.0859134	-0.315403	-0.196614	-0.389454	-0.294825
BIOCARTA_ARENRF2_PATHWAY	0.149292	0.176839	0.430233	0.338784	0.556264	0.274776	-0.453782	-0.384438	-0.0546916	0.415155	0.379925	-0.00565443	0.00877297	0.139644	-0.140743	-0.0232858	-0.116099	0.155833	-0.306888	0.280464	-0.129823	0.113092	0.0345684	-0.455508	0.00558852	0.299758	-0.301268	-0.188524	-0.151805	0.191121	0.233689	0.0562164	-0.136104	0.0100677	0.270003	-0.303991	-0.56227	0.336692	-0.511495	-0.116307	-0.128464	-0.40943	-0.304566	0.292129	-0.295785	-0.225555	-0.104686	-0.154998	-0.20379
BIOCARTA_P38MAPK_PATHWAY	0.151606	0.0673637	0.0905433	0.0480325	0.0412202	0.107682	0.0215351	0.17627	-0.0639089	0.0387159	-0.0327291	0.115685	-0.0926285	-0.121098	-0.0340722	0.0581812	-0.200625	-0.242045	-0.117932	-0.0561838	0.199039	-0.135794	-0.00747699	-0.168071	0.0302819	-0.0384161	0.249843	0.411431	-0.146054	-0.126719	0.298301	-0.0789067	0.0675125	0.152168	0.204472	-0.0959401	-0.265566	-0.185977	-0.0982241	0.0348126	-0.163913	-0.166953	-0.0659443	-0.0226236	-0.0542234	-0.0563863	-0.269409	0.28424	-0.0287619
BIOCARTA_P53_PATHWAY	-0.0344837	0.0866223	0.348019	0.307499	0.184344	0.113756	-0.32831	0.0461008	-0.000106592	-0.0745317	0.00648982	0.193513	0.333933	0.168934	0.158765	-0.0956562	0.06924	-0.287735	0.281352	0.204752	0.21379	0.182334	0.32786	0.139467	-0.406939	0.398749	0.26934	0.0882644	-0.209996	0.00740478	0.0262213	-0.179686	-0.258987	0.382242	0.0459948	-0.00360886	0.216148	0.135022	-0.35172	-0.526075	0.204154	0.247508	-0.492735	-0.3349	0.221118	-0.0260219	-0.295334	-0.318143	0.335579
BIOCARTA_PDGF_PATHWAY	-0.248779	0.0396819	0.229399	0.0275671	0.0863472	-0.103316	0.126603	-0.171399	0.0533949	0.259197	0.160395	-0.303959	-0.0258303	-0.195199	-0.154079	-0.17478	0.0689665	-0.0938514	0.0402556	0.102151	0.0953203	0.0574842	0.0672001	-0.172192	0.233938	0.058313	-0.0466711	0.292346	-0.221137	-0.302048	0.1793	-0.130316	0.18926	-0.00547121	0.209195	-0.135911	-0.0653871	0.0592363	-0.269023	-0.00703132	-0.0468414	-0.250543	-0.111029	0.0922027	-0.2346	-0.124991	-0.109254	-0.136513	-0.0019795
BIOCARTA_CCR5_PATHWAY	-0.168724	0.0774957	0.290915	0.265065	0.43665	0.340654	-0.350098	-0.197804	-0.167621	0.582632	-0.153109	-0.352848	0.41755	-0.0151628	-0.147698	0.0353275	-0.0866001	0.276573	-0.339889	0.22972	0.226138	0.137895	0.0881181	0.128231	-0.28977	-0.0674221	-0.181987	-0.0268169	0.169584	0.0021211	0.0179734	-0.0615949	0.0829977	0.193805	0.131851	-0.431634	-0.247521	0.38067	-0.480117	-0.171925	0.0406712	-0.480955	-0.548421	-0.185305	-0.12917	-0.338502	0.42604	0.216086	0.345418
BIOCARTA_PTDINS_PATHWAY	-0.0930478	0.219699	0.105851	0.403224	-0.0147942	-0.366255	0.219686	-0.0575603	-0.30396	0.326182	0.235978	-0.291508	0.00727644	-0.00839511	0.0254463	-0.15996	0.0187921	0.0117131	0.109996	-0.144927	0.212179	-0.307858	-0.160539	0.248801	-0.0485801	0.112301	-0.119835	0.282572	-0.257734	-0.274491	0.0495087	0.109812	-0.00361387	0.0427405	0.169029	-0.0645367	0.198979	-0.155939	-0.373279	-0.258923	-0.0935658	-0.138084	-0.22485	-0.127665	0.0488333	-0.225187	0.168854	0.0615331	-0.0124235
BIOCARTA_PLCE_PATHWAY	0.0111758	0.438347	0.249293	0.223373	-0.0239804	-0.438947	-0.109311	0.0863113	-0.404031	-0.587552	0.132583	0.0637695	0.237815	0.293586	0.0149577	-0.0893551	0.442129	0.20073	0.364468	-0.142935	0.187409	0.242675	-0.0868353	0.252373	-0.475216	-0.270025	-0.130214	0.259397	-0.259566	-0.164039	-0.347148	0.57861	-0.247947	0.00255612	0.230061	-0.291411	0.0646618	0.0669005	-0.0975041	-0.0231629	-0.0713371	-0.192189	0.222473	-0.226606	-0.141814	-0.455284	0.290934	-0.0141759	0.0221387
BIOCARTA_EDG1_PATHWAY	0.26109	0.0359709	0.263194	0.0727292	0.475205	-0.236794	0.0993065	-0.0247103	-0.0463317	0.100982	0.188851	-0.164641	0.252863	0.160215	-0.145156	-0.300594	0.15459	0.341936	-0.0737155	-0.156197	0.137352	0.031579	0.174526	-0.208547	-0.197574	0.135275	-0.151792	0.460327	-0.232048	-0.000211478	-0.0585147	0.124477	-0.0027261	0.298957	0.00565323	-0.233908	-0.278101	0.12387	-0.122664	0.219842	-0.350547	-0.0275339	0.0477134	-0.135134	-0.254396	-0.204643	-0.0519578	-0.133707	0.130927
BIOCARTA_CDK5_PATHWAY	-0.2723	-0.255546	-0.194435	0.345667	0.101815	0.257448	-0.109015	-0.476752	-0.280764	0.0789731	0.38403	0.0638399	0.219609	0.224854	0.367703	-0.184719	0.0501518	0.198993	0.580595	-0.180339	0.494295	0.0402531	0.202118	-0.493045	-0.190293	0.0711284	-0.1187	-0.269331	-0.399421	0.0921639	-0.0907339	0.0900239	0.0704314	0.358878	-0.143862	0.140533	0.163146	0.354888	-0.210342	-0.273387	-0.0519039	-0.226839	-0.253335	-0.00917301	-0.319094	-0.0754539	0.199926	-0.139015	-0.26246
BIOCARTA_MYOSIN_PATHWAY	0.198267	0.159065	0.256638	0.266315	0.248506	-0.381633	-0.0589739	0.0993153	-0.105153	0.246953	0.331156	-0.075497	0.392707	0.231136	-0.205189	-0.176279	-0.164242	0.315761	-0.0250208	-0.201709	0.263139	0.00248845	0.0113269	-0.16136	-0.396505	0.136281	0.132147	0.291198	0.0441556	-0.0918967	-0.0134494	0.275951	-0.0976427	0.185376	-0.280576	-0.0578151	0.157658	-0.0502128	-0.161018	-0.125944	-0.0921405	-0.464748	-0.163262	-0.244405	-0.161792	-0.137943	0.321134	-0.109292	0.0198774
BIOCARTA_PLATELETAPP_PATHWAY	0.346292	-0.521144	-0.381091	-0.0249106	-0.334543	-0.0981002	0.0712572	0.507623	0.638738	-0.185843	-0.0576641	-0.0155007	-0.0651253	0.00882989	-0.237341	-0.0993676	0.246728	0.278321	-0.361165	-0.151461	-0.103097	0.127958	-0.18959	0.298715	0.500132	0.234321	0.420103	0.479642	0.035376	-0.0737175	-0.0688955	-0.0814813	-0.243461	0.307542	0.329132	0.114208	-0.510213	0.111212	-0.526522	0.254199	-0.440923	0.381238	0.0608789	0.352234	-0.247082	-0.008951	0.359976	0.0826057	-0.22101
BIOCARTA_PS1_PATHWAY	0.402702	-0.0577141	0.0404213	-0.283042	-0.254903	-0.136727	0.449245	-0.0943017	-0.293333	0.258774	0.00707479	0.274553	-0.232027	-0.35232	0.135501	-0.390357	0.265138	-0.0130234	0.286065	-0.0603849	0.0983387	0.171656	-0.169345	-0.0500465	-0.1781	-0.0954083	0.307913	0.201073	-0.310728	-0.330162	-0.0151164	0.213064	0.0752003	0.214764	0.157346	0.130499	-0.290585	-0.504733	0.416046	-0.204028	0.0916053	0.149495	0.0273981	0.275969	-0.178822	-0.0910235	-0.456876	-0.0064958	0.209296
BIOCARTA_PROTEASOME_PATHWAY	-0.495857	0.179323	-0.341426	-0.272295	-0.493825	-0.125602	0.0861458	-0.183091	0.249336	-0.121195	-0.3372	0.112208	-0.322278	0.357348	-0.0523575	-0.323401	0.254009	-0.120933	0.215402	0.32376	0.108734	0.105377	0.413004	-0.267394	-0.0218368	-0.274974	0.104835	-0.0803301	0.134403	-0.0849345	0.436349	-0.489712	0.398498	0.136802	0.400768	0.174226	0.228632	-0.185662	-0.00324108	-0.248562	-0.256683	-0.0204104	0.183949	-0.196504	0.0359145	0.0598039	-0.400818	-0.181517	0.374503
BIOCARTA_AKAPCENTROSOME_PATHWAY	-0.0836389	-0.0827213	0.0987087	0.454927	-0.117948	-0.384696	0.355527	0.0327336	-0.420489	-0.233605	-0.169478	0.0544007	0.388331	0.305304	-0.27449	-0.147261	0.393533	0.249176	0.291861	0.00319378	0.0898239	0.309846	-0.137181	0.411799	-0.425228	0.344597	-0.307387	-0.112593	-0.297385	-0.376795	-0.345851	0.377786	0.0668641	0.0431691	0.0630472	-0.0309082	0.090439	-0.166036	0.0386459	0.0693246	-0.0591779	-0.144111	-0.110456	-0.462327	-0.166966	-0.516516	-0.285962	-0.0543915	0.338883
BIOCARTA_PTEN_PATHWAY	0.00508909	-0.0195074	0.114818	0.335299	0.16261	-0.0467393	0.182576	-0.0552771	-0.280105	0.179952	0.0754747	0.052542	-0.305194	-0.024501	-0.0965181	-0.481359	-0.24616	-0.115709	-0.086052	-0.0973954	0.0932105	0.217827	0.149517	-0.0728358	-0.136619	0.342982	-0.0668267	0.302432	-0.177442	0.037772	-0.209527	0.221354	0.225527	0.295032	-0.150924	0.0339163	-0.133118	0.109432	-0.522592	-0.150129	-0.066101	-0.191622	0.0225986	-0.280418	-0.126795	0.177816	-0.138513	0.175484	0.0957125
BIOCARTA_RAB_PATHWAY	-0.190891	0.100622	-0.306617	0.116502	0.235821	-0.21207	0.0382314	-0.306808	0.136008	0.253666	0.689564	-0.281039	0.344788	-0.375832	-0.0839178	-0.39411	0.0692972	-0.0832457	-0.0930154	-0.330477	-0.546456	0.516539	-0.0145077	0.48047	0.154149	0.108171	0.0716181	0.364296	-0.250841	0.164075	0.141924	0.0451097	-0.126587	-0.297591	0.226561	-0.0414359	0.142054	-0.185177	-0.288617	-0.286669	-0.579785	-0.130981	-0.240151	0.249698	-0.163147	-0.00532549	0.445241	-0.491866	0.153305
BIOCARTA_RAC1_PATHWAY	-0.0462494	0.145369	0.248826	0.16156	0.281218	-0.213312	-0.16192	0.188208	0.301925	0.134099	0.139972	0.110435	0.0780886	0.0236201	-0.17708	-0.361305	0.0862023	0.0421216	-0.155435	-0.229218	0.141994	-0.0859622	0.334187	0.0757617	-0.283781	0.138756	0.0875555	0.360715	-0.175684	-0.214359	-0.121609	0.259481	0.0205215	0.15874	0.170902	-0.00796647	0.00527287	0.15625	-0.185067	0.230724	-0.057134	-0.600293	-0.26491	-0.320694	-0.307545	-0.141746	-0.0543012	0.0692196	0.0201883
BIOCARTA_RAS_PATHWAY	0.104293	-0.0869061	0.137088	0.290212	0.346521	0.0389332	0.168166	-0.332738	0.0274341	0.137699	0.00777739	-0.448387	0.212082	-0.200895	-0.0203963	-0.293914	0.098958	-0.0154776	0.0690805	-0.174874	0.24254	0.327248	-0.0602679	-0.0408419	-0.133922	0.337002	0.0959358	0.233039	-0.452133	-0.339363	-0.0500251	0.186744	-0.0690457	0.291487	0.135728	-0.251719	-0.0741622	0.102973	-0.276008	0.010169	0.0642709	-0.444274	-0.304958	-0.0621186	0.237107	-0.327964	0.0598832	-0.232681	-0.0189005
BIOCARTA_NKCELLS_PATHWAY	0.431198	-0.307063	0.0138464	0.200068	0.330077	-0.158853	-0.133291	-0.175641	0.357933	0.412681	0.197706	-0.498915	-0.153553	-0.458432	-0.363788	-0.126593	0.214688	0.244516	0.0263052	-0.146486	-0.387079	-0.0308846	0.518952	0.373922	0.220014	0.0141826	0.0349972	0.213747	-0.385788	0.0343524	-0.231353	-0.150969	-0.133813	0.0871296	-0.0176619	-0.53193	-0.05266	0.409358	-0.504385	0.150168	-0.439948	-0.429521	-0.104184	0.392828	-0.0698522	-0.161018	0.156361	-0.264778	-0.216149
BIOCARTA_RB_PATHWAY	-0.206013	0.103025	0.435005	0.471352	0.309222	0.235574	-0.39889	-0.204385	-0.531875	0.0552339	-0.326961	-0.0361207	0.530321	-0.05566	-0.265186	-0.0850559	-0.112744	0.20586	0.331004	-0.0550341	0.411331	-0.012468	0.554781	0.0828002	-0.313548	0.312208	0.238937	-0.315652	0.1603	0.557947	-0.127613	0.221556	-0.184341	0.146522	-0.323955	-0.35977	0.106861	0.418612	-0.423082	-0.422264	-0.198636	0.134407	-0.427367	-0.661949	-0.164736	-0.173956	-0.505124	-0.324117	0.3428
BIOCARTA_CHREBP2_PATHWAY	-0.325141	0.21048	0.240551	0.247934	-0.0367505	-0.101975	0.194284	-0.137524	-0.226351	-0.187354	-0.345944	0.285638	0.033041	0.185954	-0.0708805	-0.0472933	0.252807	0.109642	-0.0675447	-0.190709	0.303874	-0.00740165	0.261686	0.023794	0.0247489	0.137995	-0.212248	0.169454	-0.0201834	0.0701622	-0.138089	0.0429127	-0.148025	-0.0304267	0.137331	-0.0912588	-0.0819456	0.194246	-0.123283	-0.0409666	0.059006	-0.0881109	0.0132285	-0.0806329	-0.305694	-0.139592	-0.183486	0.215524	0.156496
BIOCARTA_BAD_PATHWAY	-0.066761	0.0602945	0.266605	0.265409	-0.00641421	-0.175593	-0.294037	-0.251062	-0.255833	-0.0650453	0.0802293	-0.110184	-0.0319484	0.233961	-0.0293659	-0.147555	0.0966641	0.0736168	0.313341	0.0585628	0.196686	0.14622	0.12675	-0.000582792	-0.246711	0.201049	-0.264321	0.156453	0.178651	0.0859405	-0.139676	0.173427	-0.0196436	0.198729	-0.0847841	-0.223005	0.0753382	0.32599	-0.354687	-0.0493077	-0.217291	-0.303926	-0.176085	-0.0476427	-0.0296079	-0.0909095	-0.194801	-0.0102691	0.268836
BIOCARTA_CK1_PATHWAY	-0.174533	0.22145	0.482068	0.102401	-0.205792	-0.452542	-0.121202	-0.155558	0.068128	-0.519579	0.149771	0.277828	0.222468	0.191202	0.101469	-0.207773	0.0411806	0.223317	0.184348	-0.204261	0.203088	0.052393	0.311495	0.25303	-0.383352	-0.0403462	-0.351396	-0.290826	0.0197504	-0.141226	0.00392865	-0.031701	0.307006	0.164816	0.172082	-0.330756	0.163302	0.45939	-0.121747	-0.0097842	-0.236524	-0.280743	-0.159978	-0.0645929	-0.424936	-0.447373	0.174821	0.182929	0.341745
BIOCARTA_EIF2_PATHWAY	0.578247	-0.115579	0.236887	-0.33371	0.112301	0.30557	-0.104906	0.411502	-0.413147	-0.101264	0.123111	0.0422698	0.0504609	-0.21723	-0.38746	0.151634	-0.14726	0.160683	0.00930687	0.0791685	0.0693552	-0.0467182	-0.45866	0.282831	-0.369061	-0.0940364	0.111837	0.0678715	-0.395247	0.367684	-0.153515	0.479418	-0.313292	-0.12094	0.145032	0.404288	0.00309371	-0.38262	0.0118905	-0.406727	-0.0533531	-0.185149	-0.202884	-0.230167	-0.352083	-0.0845399	-0.26802	0.264238	0.334057
BIOCARTA_EIF4_PATHWAY	-0.0236112	0.0534869	-0.093335	0.294356	0.0982017	0.0975289	0.31122	-0.119338	-0.310995	0.0644037	0.336999	-0.0506024	0.0056308	0.17727	-0.0394613	-0.0405151	-0.17456	0.236552	-0.29612	0.0635702	0.204257	-0.274878	-0.0823058	-0.224181	-0.35715	-0.124445	-0.0404891	0.319611	0.0422858	-0.196674	0.0704171	0.342615	0.319957	-0.0324359	0.324614	0.0357175	-0.346555	0.348796	-0.258433	-0.0149489	0.301079	-0.353559	-0.205374	-0.356006	-0.149494	-0.202169	0.167809	-0.0933291	0.129125
BIOCARTA_STEM_PATHWAY	0.249228	-0.179224	0.0999921	0.268065	-0.188976	-0.00287047	0.0403834	0.150545	0.38436	-0.306945	0.327687	-0.143217	-0.0805014	0.318488	-0.121532	0.274799	0.143094	-0.0040364	-0.276264	-0.0941527	-0.112598	0.104413	-0.4914	-0.113599	-0.118955	0.131425	0.0238715	0.289769	0.0256059	-0.50052	0.228447	-0.195837	-0.473823	0.170327	0.185178	-0.294573	-0.157538	0.0881701	-0.216302	-0.0776233	0.0953411	0.4224	0.335557	-0.125349	-0.373126	0.272862	0.0429145	-0.0959471	0.252344
BIOCARTA_P27_PATHWAY	-0.186966	-0.0920736	0.288711	0.552317	0.315972	0.380382	-0.419564	0.0486555	-0.591724	-0.438604	-0.283803	0.608342	0.325697	0.590525	0.0367066	-0.121897	0.13096	0.0264913	0.392365	0.293456	0.297919	0.0694867	0.338498	0.268826	-0.605795	-0.0155687	0.37138	-0.335235	0.262608	0.0581306	-0.301296	0.423466	0.206057	0.186494	-0.189155	0.169467	0.352575	0.422827	-0.298801	-0.666314	0.278584	-0.0371608	-0.636273	-0.755769	0.339777	-0.0553175	-0.112838	0.589457	0.171154
BIOCARTA_PGC1A_PATHWAY	0.0622981	0.175604	0.0324477	0.487293	0.445278	0.136005	-0.175555	0.0666346	-0.308506	-0.200872	0.024887	0.15981	0.205155	0.326662	-0.273947	0.248299	0.0144787	-0.076878	-0.175894	-0.418989	0.326769	0.268101	0.0481622	0.131047	0.220753	0.219625	-0.0833179	0.135662	-0.246236	-0.260557	-0.0281605	0.202346	-0.118415	-0.0279736	0.0627764	-0.222319	-0.13289	-0.0916689	-0.354406	-0.390856	0.0983116	-0.307654	-0.489876	0.134969	-0.491377	-0.356004	0.301353	0.458041	0.0894207
BIOCARTA_PML_PATHWAY	0.0490993	-0.390261	0.00137001	-0.0913299	-0.31365	0.256227	0.285631	0.294179	0.151027	0.16893	-0.49756	0.0507127	0.180231	0.397479	0.154619	-0.0137871	0.15823	-0.321033	0.200308	-0.31107	0.24815	-0.295064	-0.0189487	0.0478988	-0.126296	0.212491	0.329612	0.252944	-0.365699	0.262743	0.0753431	-0.349253	0.383915	0.00332868	0.309292	-0.259629	0.275075	-0.11436	-0.0902321	0.107419	-0.22566	0.105037	-0.14782	-0.0947559	-0.189953	0.109645	-0.434393	0.155816	-0.383444
BIOCARTA_DREAM_PATHWAY	-0.014095	0.265966	-0.0216818	-0.141655	-0.191829	-0.448005	0.0550292	-0.183036	0.131793	-0.312049	0.193049	0.148329	0.0614463	0.327515	-0.0551167	0.269329	0.343842	0.346307	-0.0130284	-0.112105	0.0410102	-0.0417454	-0.00551568	-0.163135	-0.248363	0.0458564	-0.143607	-0.160341	0.111883	0.0987762	-0.24846	0.287564	0.0147432	-0.0486472	0.0514228	-0.326172	-0.2213	-0.195339	-0.0125809	0.213072	-0.198191	0.086687	-0.0229058	0.403047	-0.00897723	-0.289773	0.00279072	0.492897	-0.161803
BIOCARTA_LEPTIN_PATHWAY	0.378181	0.219432	-0.0498513	0.0224102	0.355767	-0.527408	0.166949	0.0551807	0.451512	0.215508	-0.226383	0.056023	0.19004	-0.0490933	-0.494291	-0.0225526	-0.0963208	-0.419309	-0.267649	-0.197876	0.338331	-0.302852	-0.332483	-0.221692	0.101618	-0.13119	-0.260408	0.349658	-0.0278258	-0.294524	-0.00908334	-0.256626	0.207638	0.0159024	0.335427	-0.51469	0.325147	-0.235391	-0.0379947	0.292316	0.108344	0.0764871	-0.209774	0.26471	-0.042623	-0.249306	-0.353872	-0.130565	0.203526
BIOCARTA_RHO_PATHWAY	0.299175	0.255446	0.319616	0.327924	0.231456	-0.375304	0.186923	0.0393249	0.0138797	0.210294	0.0922192	-0.0101736	-0.0369368	0.00778696	-0.330613	-0.325114	0.02484	-0.422157	-0.161178	-0.377187	0.381187	0.0194638	-0.0346159	-0.0904025	0.169241	-0.0890394	0.20477	0.541917	-0.376116	-0.232888	0.116436	-0.233549	0.00894448	0.225643	-0.121495	-0.310798	0.13011	-0.347595	-0.308507	0.361553	-0.253003	-0.202004	0.396489	-0.149394	-0.345972	0.0224763	-0.244452	0.140896	-0.127152
BIOCARTA_AKAP13_PATHWAY	-0.00879843	-0.286499	0.0590199	0.250973	-0.0710544	-0.33432	0.557901	0.291363	-0.484361	-0.338724	0.266643	0.203454	-0.0804625	-0.186108	-0.446127	0.0139912	0.548344	0.215143	0.0335837	-0.0937016	0.0428475	0.250907	-0.251313	0.194014	-0.558472	-0.0441887	-0.0659682	0.496754	-0.520957	-0.388387	-0.122178	0.0460502	0.169832	-0.0634015	0.114042	-0.191822	-0.139485	-0.182454	0.224537	0.0455542	0.269712	0.115451	0.373865	-0.143577	-0.276229	-0.17112	-0.263684	-0.00704143	0.0583305
BIOCARTA_ATRBRCA_PATHWAY	-0.0340127	-0.320098	0.0745	0.122756	-0.28888	0.0423056	-0.0879522	0.252238	-0.472013	-0.348868	0.0726427	0.128878	0.411604	-0.171068	-0.341068	0.0310994	0.233105	-0.0858902	-0.0498577	-0.110114	0.152917	-0.29466	-0.0661307	0.327465	-0.364475	-0.094602	-0.154674	-0.0943408	0.356679	-0.0288648	-0.0223774	-0.426855	-0.218248	-0.0214746	-0.215175	0.0418984	0.292658	0.444215	0.164763	-0.0473459	-0.0889534	-0.0241344	-0.158881	-0.407442	0.316164	0.266146	-0.241344	-0.190161	0.394127
BIOCARTA_CARDIACEGF_PATHWAY	0.394364	-0.0396195	0.00378065	0.123724	0.167222	0.239204	0.00745467	0.0720377	0.427534	0.0166775	-0.276861	-0.0830208	0.34031	0.00572383	-0.29615	0.144104	0.463701	0.313724	-0.0776601	0.0543248	0.277405	-0.0520879	-0.225926	0.024642	0.188197	-0.41254	-0.133431	0.603065	-0.433	-0.308608	-0.0104436	-0.367852	-0.143647	-0.0617874	0.3498	-0.347267	-0.377838	0.0350539	-0.264766	0.259276	0.341784	-0.211439	-0.289542	0.250313	-0.162677	0.125462	-0.0321012	-0.175265	-0.117733
BIOCARTA_HER2_PATHWAY	0.0915732	0.146613	0.0331068	0.105408	0.0188018	0.0764927	0.0198758	-0.101298	-0.0545136	0.0972172	-0.114696	-0.260382	-0.166513	-0.00534496	0.0432176	-0.336668	0.207834	0.0215387	-0.123151	-0.0905831	0.221512	0.198477	0.134625	-0.0738346	0.0480245	-0.184862	0.194829	0.145394	-0.135211	-0.180327	0.0402633	-0.193843	0.0590659	0.210774	0.315876	-0.199998	-0.25734	0.212703	-0.511451	0.191859	-0.160442	-0.201688	-0.160543	0.15809	-0.130179	-0.0160656	-0.124265	0.0269744	-0.00367148
BIOCARTA_ERK5_PATHWAY	-0.12068	0.0574652	0.324878	0.0415337	-0.0218536	0.0600118	-0.218001	-0.237091	-0.372885	-0.111726	0.0892362	0.132136	-0.0205837	0.277737	-0.0939786	0.0926148	-0.184571	0.0200536	0.243513	0.096109	0.337718	0.109222	0.25018	-0.150426	-0.0900136	-0.0578401	-0.177592	0.286246	-0.130747	-0.250051	-0.276678	-0.0130497	0.350645	0.304798	0.335333	-0.116878	-0.214681	0.103121	-0.260597	-0.108042	0.136416	-0.392165	-0.236573	-0.0851437	-0.025194	-0.0780366	0.066223	0.340711	-0.0637085
BIOCARTA_MAL_PATHWAY	0.151692	-0.216304	-0.027391	0.316427	0.212383	-0.0632462	0.177671	-0.401582	-0.290218	0.395178	0.101614	-0.121578	0.176654	-0.131085	-0.0716909	-0.105081	-0.039902	-0.120391	0.0768109	-0.0788516	0.111456	0.123162	-0.0134935	-0.0692781	0.291546	0.395207	-0.0984935	0.0160935	-0.393272	0.048138	0.376073	-0.0604158	-0.317724	0.198367	-0.103503	-0.0860869	-0.0359037	0.241256	-0.169884	-0.243801	-0.332361	-0.142766	-0.00981585	-0.302254	0.0578485	-0.184722	-0.097898	-0.376814	0.0916964
BIOCARTA_MEF2D_PATHWAY	0.156213	0.210735	0.345136	0.306761	0.490172	0.0253254	-0.139474	-0.51569	-0.362022	0.0805835	-0.0202298	0.112256	0.249333	0.511536	-0.404291	-0.411688	0.12765	0.357118	0.129214	-0.353093	0.221433	0.241287	0.360996	0.00162378	-0.0280811	0.199081	-0.0379239	0.025494	-0.223585	0.231421	0.0994053	0.188253	-0.22421	0.0253367	-0.130291	-0.252572	-0.139424	0.00556031	-0.39071	-0.144373	0.0855139	-0.233174	-0.0952777	-0.35396	-0.0591127	-0.227223	-0.0381973	0.140441	0.26431
BIOCARTA_MITOCHONDRIA_PATHWAY	0.394159	-0.25173	0.0550941	-0.0570186	-0.0412378	-0.221446	-0.13825	-0.268861	0.424645	0.272277	0.0423334	-0.296763	0.0719011	-0.10112	-0.30153	-0.128338	0.416755	-0.476782	0.064655	-0.0549324	-0.249809	0.123194	-0.0410253	-0.140991	0.333389	0.113352	0.209641	-0.0846042	-0.0854296	-0.207544	0.592634	-0.620989	-0.15384	-0.0418059	-0.0870793	-0.44401	0.239747	-0.235717	-0.326064	0.146337	-0.140408	0.376133	0.257651	-0.173915	0.364609	-0.0316345	0.265717	-0.405075	0.329594
BIOCARTA_ACH_PATHWAY	0.143755	-0.315952	0.11748	0.205007	0.469959	0.0640292	-0.167675	0.0185485	-0.0339366	0.110279	-0.155653	-0.282257	0.165757	0.178889	0.0313846	-0.316984	-0.0295821	-0.162799	-0.0739071	0.0504995	-0.217628	0.146562	0.331347	0.0300098	-0.320985	0.350393	-0.299472	0.306019	0.151715	0.264967	-0.38823	0.066797	0.0719159	0.285769	-0.274493	-0.0668851	-0.0685109	0.285719	-0.356844	0.197801	-0.104433	-0.0409437	-0.25498	-0.0936135	-0.187591	0.134655	0.0768421	0.0839265	0.0363559
BIOCARTA_PARKIN_PATHWAY	0.202523	0.371452	-0.461249	-0.425448	-0.0961091	0.0725965	-0.373067	-0.287057	-0.0177621	-0.206368	0.218975	0.303735	-0.1323	0.22744	0.00517864	-0.558598	0.161524	-0.0743543	-0.0497071	0.0623806	0.25262	0.11082	0.120998	-0.111739	-0.295542	-0.0725269	0.0470928	0.133313	0.457937	0.0524834	0.386218	-0.130137	0.285243	0.287832	0.400564	0.0933976	-0.229946	0.121764	0.35761	-0.537081	-0.118926	-0.443835	-0.0291542	-0.21727	-0.496409	-0.539779	0.0349248	0.423855	0.0179149
BIOCARTA_CDC42RAC_PATHWAY	0.270884	0.183499	-0.174188	0.15399	0.514661	-0.552359	0.148983	0.187697	0.328054	0.637829	0.434477	-0.269955	0.068971	-0.245683	-0.602611	-0.556916	-0.0124742	0.210862	-0.455296	-0.490982	0.344397	0.235373	0.336126	0.221381	-0.369689	-0.329594	0.0835607	0.60797	-0.456659	-0.300803	0.114492	-0.149831	0.279879	-0.0554236	0.262852	-0.549294	-0.14384	0.0717105	-0.454149	0.583031	-0.395543	-0.337389	0.351936	0.0638181	-0.554557	0.00506677	-0.17081	0.387687	0.0205798
BIOCARTA_RANMS_PATHWAY	-0.355954	0.25532	0.0806001	0.0588657	-0.0873974	0.242343	-0.549842	-0.332657	-0.648525	-0.363556	-0.358002	0.672606	0.394852	0.673009	0.385436	-0.109746	0.521915	0.484782	0.335782	0.477233	0.597578	-0.513983	0.196142	-0.0120406	-0.513094	0.192213	0.000735795	-0.48293	0.0768266	0.00423394	0.00707491	0.0810196	-0.0965824	-0.0130453	-0.433867	-0.0514254	0.321992	0.351544	0.182566	-0.759222	-0.0051362	0.223513	-0.405788	-0.702235	-0.076019	-0.388493	-0.0508043	0.0683011	0.301688
BIOCARTA_BARR_MAPK_PATHWAY	0.0939619	-0.261677	0.00718947	0.394021	0.425379	-0.159932	-0.14274	-0.485461	-0.232427	0.176313	0.37146	0.041022	0.45595	0.30873	0.271198	-0.119931	0.00552932	0.375757	0.409567	-0.391843	0.178976	0.260294	0.115623	-0.0915325	-0.196655	0.372083	-0.288076	-0.158986	-0.434135	-0.0419401	-0.0527031	0.284095	-0.327402	0.330138	-0.203754	0.158757	0.171392	-0.252315	0.300713	-0.190098	-0.454148	-0.323404	-0.287277	0.312751	-0.00910686	-0.465939	0.239235	-0.388556	-0.0105706
BIOCARTA_TOB1_PATHWAY	0.109095	-0.0955462	0.0371366	0.301232	0.144559	0.324447	-0.0338687	0.545035	0.160677	-0.34253	-0.29077	0.209673	-0.359858	-0.240612	-0.00831848	0.0193878	0.014934	-0.28517	0.0070044	-0.161085	0.311203	0.0939205	0.141307	-0.0436953	-0.201401	-0.0255555	0.126772	0.44633	0.161496	-0.218682	-0.183854	-0.0212815	-0.273563	-0.338841	0.388759	-0.0656512	-0.18881	-0.214273	-0.075602	-0.152828	0.157194	0.101426	-0.0562487	-0.0486472	-0.0175695	-0.147409	-0.492275	0.0117307	-0.0122977
BIOCARTA_BARRESTIN_SRC_PATHWAY	0.0594645	-0.228902	0.165322	0.412871	0.443637	-0.185271	-0.337105	-0.483953	-0.25325	0.103433	0.369452	0.0310768	0.510919	0.407356	0.328123	-0.194101	0.132198	0.266331	0.40894	-0.247328	0.0606176	0.425587	0.0975486	0.0351373	-0.198654	0.29199	-0.132821	-0.300891	-0.294377	-0.0612133	-0.0746068	0.258395	-0.22878	0.318286	-0.175476	0.0380962	0.255931	-0.249821	0.0089619	-0.314265	-0.354485	-0.338647	-0.378343	-0.0454449	0.016468	-0.266266	0.285411	-0.401507	0.0145353
BIOCARTA_NKT_PATHWAY	0.181645	0.0896291	-0.0658461	0.222274	-0.160782	0.137715	-0.328849	0.380243	0.241328	-0.236648	-0.136136	0.290682	-0.248571	0.0435724	-0.248114	0.340022	0.18823	-0.139166	-0.120829	0.00242607	0.0122549	-0.13199	-0.302704	0.163499	-0.161592	0.12166	0.101952	0.383516	0.29744	-0.266295	-0.120328	-0.304882	-0.600908	0.0848263	0.205102	-0.124613	-0.148184	-0.158394	0.286922	0.126086	0.282147	0.326995	-0.13512	0.0999875	-0.375234	0.136835	-0.36669	0.239965	-0.110408
BIOCARTA_IL1R_PATHWAY	0.339319	-0.278271	-0.107201	-0.0252795	0.0531601	0.20652	0.112562	-0.130079	0.403761	-0.0845361	-0.205774	-0.131891	0.147711	-0.169784	-0.049628	0.260571	0.327874	0.132203	-0.138174	-0.0289922	-0.0296044	-0.379593	-0.223874	-0.202396	0.0471157	-0.21274	-0.117337	0.365655	-0.225259	-0.027945	-0.0099717	-0.355088	-0.287026	-0.171844	0.424354	-0.323447	-0.0715831	-0.15333	-0.305834	0.168041	-0.437491	0.119944	-0.169333	0.111538	0.0362924	0.00214573	0.00153098	-0.0240964	0.0947871
BIOCARTA_MET_PATHWAY	-0.0751696	-0.131005	-0.131749	0.173018	0.0747963	-0.160912	0.267531	-0.0854256	-0.128636	-0.0650373	0.29678	-0.199386	0.0776827	-0.0433536	0.0484425	-0.227924	0.188734	-0.0148224	-0.0588167	0.186305	0.148376	0.131702	-0.0447482	-0.326269	0.0425313	0.0618492	0.192163	0.283804	-0.219072	0.0108664	0.254778	0.059541	-0.0532315	0.134871	0.165694	-0.199503	-0.200509	0.21616	-0.244514	0.0293031	-0.155953	-0.135088	-0.198606	-0.0707462	-0.172985	-0.00320893	-0.0998885	-0.0606773	0.0579854
BIOCARTA_GPCR_PATHWAY	0.0160465	-0.0156436	0.18636	0.18021	0.282784	-0.150658	0.00359267	-0.332106	-0.266435	-0.029405	0.256521	0.0345818	0.385874	0.22506	-0.048207	-0.132434	0.00176971	0.479318	0.114674	-0.1077	0.30974	0.256245	0.193914	0.0196972	-0.257126	-0.130674	-0.0697238	0.0573298	-0.0435729	-0.0680563	-0.117486	0.288017	0.0378534	0.184523	-0.0899693	-0.414158	0.062633	-0.0935237	-0.293573	-0.278744	-0.120604	-0.366367	-0.335478	-0.146848	0.00775247	-0.313045	0.397532	0.137082	0.245444
BIOCARTA_IGF1MTOR_PATHWAY	0.0701255	-0.0708287	0.0286315	0.297312	-0.100897	0.206553	0.0268783	0.327056	-0.238225	-0.220963	0.232855	0.337896	-0.0525992	-0.0121749	0.0409909	0.233879	-0.291489	0.298714	-0.322332	0.342006	0.102527	0.0583549	-0.269791	0.0347581	-0.424793	0.186527	0.171415	-0.159637	-0.109955	-0.481165	-0.368934	0.436676	0.16137	-0.0755727	0.236394	0.320955	-0.352616	0.28995	-0.0127601	-0.126617	0.39175	-0.156029	-0.229826	-0.226811	0.0854447	0.00812026	-0.109819	0.0163438	-0.00570679
BIOCARTA_SODD_PATHWAY	0.0238522	-0.299636	-0.426254	-0.24571	0.275263	0.059533	0.142788	-0.276328	0.568256	0.163665	-0.0326727	-0.391817	-0.0514615	-0.389291	-0.00658733	-0.3157	0.326714	-0.438387	0.409001	-0.341483	0.0209198	-0.014738	-0.338667	-0.0160852	0.537435	-0.182779	0.000242228	0.404231	-0.368958	-0.0143592	0.166021	-0.449705	0.295292	0.207728	-0.509384	-0.357457	0.170264	0.266667	-0.257718	0.280983	-0.556553	0.533543	0.109984	0.294133	0.0983219	0.380196	-0.435088	-0.627961	-0.214995
BIOCARTA_SHH_PATHWAY	-0.350019	-0.00528155	0.16501	0.00205675	-0.496206	-0.370684	0.57647	0.0772685	-0.492917	-0.202308	0.127942	0.233392	-0.0059258	0.477111	0.201069	0.325334	0.369959	0.164427	0.0587444	0.0752552	0.424312	-0.230737	-0.0982023	-0.24415	-0.260383	-0.0540462	0.0267968	0.112662	-0.138356	0.0285383	0.173014	0.379803	0.131693	0.103331	-0.0596064	-0.138952	-0.140581	-0.160205	-0.0405166	0.276372	0.0224339	0.101362	0.11312	-0.138963	0.00636111	0.236533	-0.279585	0.145544	0.168837
BIOCARTA_PTC1_PATHWAY	-0.609554	-0.252057	-0.194307	0.499339	-0.238563	0.265424	0.157721	0.155166	-0.376392	-0.215557	-0.482376	-0.0257444	0.462827	0.142126	-0.30957	0.337406	0.34411	0.0239653	-0.336597	-0.0812014	0.556595	-0.551571	0.305086	-0.053554	-0.161847	-0.4033	-0.0294135	-0.57112	0.22437	-0.43445	-0.305538	0.0521667	0.466337	0.16169	-0.363362	-0.382866	0.124296	0.502613	0.376525	-0.210381	0.303878	0.453451	-0.0603549	-0.411613	0.148901	-0.0096633	-0.418307	-0.243449	0.630239
BIOCARTA_SPRY_PATHWAY	0.0378436	-0.285536	-0.137753	0.146123	0.0839489	-0.068799	-0.261934	-0.305163	-0.246845	-0.194878	0.0626357	-0.191335	-0.0932352	-0.0225178	0.282645	-0.515453	0.376698	0.108127	0.240277	0.0757285	0.114201	-0.0173566	0.0601196	-0.165599	0.17585	-0.183439	0.277759	0.235906	-0.0312954	-0.066032	0.0103375	0.0370494	-0.130114	0.208711	0.193956	-0.257906	-0.0619326	-0.204841	-0.39686	0.168639	-0.079858	-0.0780742	0.349384	0.22905	0.0830193	-0.00950446	-0.215698	-0.277275	-0.133741
BIOCARTA_BARRESTIN_PATHWAY	0.196596	-0.404428	0.357302	0.215595	0.306596	-0.544838	-0.296899	-0.204054	0.155057	0.116976	0.0910922	-0.153117	0.494352	0.655093	-0.0644756	0.0120878	-0.338028	0.143018	0.347928	-0.323775	0.311487	0.302279	0.305388	0.460312	0.0516078	0.189209	-0.348053	-0.0799311	-0.36914	-0.147625	0.0487402	0.157073	-0.136715	0.336869	-0.272644	0.0874036	0.375356	-0.619952	0.236148	-0.147219	-0.366347	-0.157655	-0.190969	0.393485	-0.17528	-0.620084	0.556522	-0.240889	0.00619401
BIOCARTA_STATHMIN_PATHWAY	0.0720188	0.310325	0.0182494	0.358533	-0.0788684	-0.0545832	-0.0280196	0.299223	-0.0643222	-0.389963	-0.445875	-0.146296	-0.0102487	0.259263	-0.19899	0.104013	0.213075	0.155354	0.298905	-0.166953	0.222296	-0.145876	0.351767	0.322879	0.150623	-0.101089	0.257236	-0.154069	0.289385	-0.210531	-0.218401	0.332154	-0.0184185	-0.18615	0.030209	-0.411559	-0.211148	-0.0613519	-0.403449	-0.301672	-0.0897672	-0.228304	-0.38507	-0.193954	-0.277127	-0.433049	0.171244	0.231995	0.344179
BIOCARTA_HSP27_PATHWAY	0.0616631	-0.381781	0.24884	0.0575442	-0.0879848	-0.269356	-0.315934	-0.143722	0.0464447	0.236794	-0.112886	0.0829811	-0.183833	0.107119	0.111195	0.282693	0.443675	-0.46829	0.0434253	-0.22502	0.161414	0.13136	-0.395145	0.179023	0.0763446	0.331749	0.201386	0.243413	-0.159523	0.235734	-0.0188114	-0.327312	0.103022	0.27396	0.153763	-0.250321	0.342848	-0.183327	-0.25473	0.395046	-0.454573	0.219294	-0.0434244	-0.211718	-0.0449393	0.3423	0.236829	-0.306977	0.173049
BIOCARTA_TCR_PATHWAY	-0.0798646	-0.0200955	0.234121	0.172761	0.298491	0.037332	-0.177221	-0.217358	-0.147279	0.133163	0.0507352	-0.177863	0.0772707	-0.123511	-0.0724226	-0.261326	0.136355	0.239597	0.147463	-0.0210329	0.333356	0.170604	0.26839	0.0769773	-0.124351	0.107967	0.0779945	0.162412	0.0767902	-0.129919	-0.114523	0.151207	0.0162841	0.0131228	0.105295	-0.350602	-0.158494	-0.081604	-0.454632	-0.182081	0.0216876	-0.388632	-0.31853	-0.0307944	-0.0236423	-0.283059	0.194743	0.0161242	0.268719
BIOCARTA_TCYTOTOXIC_PATHWAY	0.236518	0.390192	0.309368	0.32187	-0.0969002	0.226767	-0.18696	0.370948	0.364689	-0.0353903	-0.582209	-0.285226	-0.283052	-0.0671411	-0.0178264	-0.233726	-0.36002	-0.220844	0.427406	-0.34961	0.483945	-0.0956041	-0.0521207	-0.0323637	0.156868	0.0228585	0.527037	0.068309	0.206272	-0.420162	-0.0586497	0.123154	-0.213069	-0.384198	0.483028	-0.307941	-0.333058	-0.41693	-0.572784	0.0652111	0.0772938	-0.105428	-0.291929	0.169315	-0.171317	-0.456807	0.255218	-0.0148708	0.382439
BIOCARTA_THELPER_PATHWAY	0.194015	0.379971	0.296172	0.338781	0.0408517	0.223385	-0.171669	0.370589	0.297061	-0.350938	-0.56053	-0.268862	-0.453964	-0.136959	-0.113297	-0.0961742	-0.362943	-0.220096	0.445145	-0.306514	0.425968	-0.108442	-0.0493189	0.0702346	0.0462215	0.148614	0.495156	0.0678713	0.419066	-0.386807	-0.184926	-0.0374111	-0.468025	-0.370705	0.596818	-0.408341	-0.441297	-0.307254	-0.57659	0.0589962	0.118714	0.0294473	-0.294002	0.18735	-0.243816	-0.31211	-0.017612	0.0757082	0.426423
BIOCARTA_TALL1_PATHWAY	-0.0277878	-0.266978	-0.063408	0.14269	0.0648561	0.123781	0.331501	-0.484889	0.219255	0.208443	-0.0885218	-0.160938	0.421957	0.100556	0.0790331	0.0957072	0.152989	0.11967	-0.156516	0.126892	-0.337312	-0.370441	-0.282884	0.0355273	0.135241	0.217869	-0.305491	0.260759	-0.378149	0.0326251	0.302822	-0.254389	-0.357229	-0.0183014	-0.0130842	-0.47055	-0.196179	0.130918	-0.167102	0.0532065	-0.21561	0.241744	-0.173175	0.113798	-0.00597459	-0.0929037	-0.0472929	-0.0672088	0.113282
BIOCARTA_TEL_PATHWAY	0.242224	0.18464	0.432786	0.278811	0.00259191	-0.0278098	-0.0977652	-0.225624	-0.0118128	0.129637	-0.548517	-0.14949	0.0993946	0.220874	0.0597869	-0.0324553	0.126622	-0.0604829	-0.101487	-0.209889	0.411438	0.181887	0.367234	-0.243524	0.0403916	-0.0495301	0.0763416	-0.152249	-0.171656	0.463782	0.179608	0.116688	-0.310493	-0.0110476	0.164466	0.048424	-0.434176	-0.0335798	-0.266827	0.0839359	-0.0296792	0.175115	-0.246913	0.271328	0.187365	-0.249275	-0.370649	0.366966	-0.232074
BIOCARTA_TGFB_PATHWAY	0.133131	-0.137454	-0.00221403	0.248721	0.182375	-0.00448363	-0.0806177	-0.152391	0.0317702	-0.0786966	0.425987	0.302537	-0.167921	-0.0487857	0.159951	0.06876	-0.137123	0.0975555	-0.0583468	-0.24995	0.100546	0.0515058	-0.084587	-0.0948471	-0.40225	-0.238863	0.195022	0.319354	0.230043	0.0972792	-0.0725617	0.102598	0.174887	-0.214933	0.172177	-0.017371	-0.234831	0.25495	-0.268083	-0.101562	0.058483	0.254979	0.011958	0.316619	0.187552	0.244916	-0.522026	-0.0563495	-0.507524
BIOCARTA_TH1TH2_PATHWAY	-0.0306853	-0.0273813	0.0201061	0.0565985	-0.203371	0.0974265	-0.303196	0.318069	0.25482	-0.137189	-0.231943	0.354748	-0.336392	0.0843666	0.0344812	0.0268221	0.3012	-0.363997	-0.14679	0.163867	0.281857	-0.109804	-0.166721	0.19436	-0.0764956	0.184831	0.0753818	0.349538	0.16144	0.00379076	-0.108239	-0.159488	-0.461714	0.0021093	0.126525	-0.208285	-0.0409999	-0.313601	0.300498	-0.000859205	0.0221882	0.278993	-0.192203	0.212972	-0.276237	0.126157	-0.377405	-0.0421473	0.096749
BIOCARTA_41BB_PATHWAY	0.257893	-0.519478	-0.241415	0.242493	0.421026	0.0354893	-0.252382	-0.191412	0.442839	0.143344	-0.244532	0.185616	0.341427	-0.174952	-0.239953	-0.262545	0.313897	0.0493903	-0.115633	-0.0280903	0.400278	-0.187439	-0.173964	0.110616	0.0971575	0.241357	0.0257035	0.293341	0.124779	-0.249415	0.0525716	-0.136676	-0.1281	0.0367306	0.123857	-0.45836	-0.414084	-0.151595	-0.100306	-0.311135	-0.403819	-0.146918	-0.445677	0.180999	0.229726	-0.0131536	-0.0283105	0.152058	0.314344
BIOCARTA_KREB_PATHWAY	0.473688	0.400872	0.510765	-0.355362	0.595414	-0.148961	-0.443932	-0.186071	0.409644	-0.146226	-0.00410971	-0.378189	-0.18121	0.519743	-0.425076	0.594753	0.374399	-0.351018	-0.175613	-0.458253	0.423203	-0.256698	-0.304225	0.186694	0.45833	-0.534712	-0.476691	0.178191	-0.476469	0.398803	0.348547	-0.412094	-0.20321	-0.195722	-0.510941	0.513032	0.270394	0.408026	0.0762738	-0.677717	-0.283267	-0.283323	-0.0939644	0.29658	-0.211653	0.0980299	-0.233885	0.17321	0.550435
BIOCARTA_CTLA4_PATHWAY	0.0747583	0.0833194	0.0330725	0.411117	-0.0136292	0.214035	-0.0364265	0.346547	0.448625	0.0707319	-0.330991	-0.158001	-0.405186	-0.292156	-0.00813312	-0.375903	-0.257365	-0.222811	0.135589	0.0674746	0.1454	-0.331867	0.403276	0.145161	0.0823955	0.369513	0.131	0.243186	0.211034	-0.148855	0.0476833	0.0366677	-0.0052528	0.0260056	0.427488	-0.123164	-0.326908	-0.018529	-0.322112	0.0286962	-0.144633	-0.0640058	0.031291	0.0829721	-0.063452	-0.382649	-0.352197	-0.432378	0.413589
BIOCARTA_LONGEVITY_PATHWAY	-0.390827	-0.0766962	0.58591	0.160559	0.221792	0.0630844	-0.635538	-0.0069291	0.233608	-0.428475	-0.206626	-0.353113	-0.210656	-0.0952358	-0.512003	0.188873	0.137893	-0.245965	0.268049	-0.110795	0.125239	0.492861	0.0966782	-0.230587	-0.307503	0.0816065	-0.118594	0.413316	-0.329407	-0.384956	-0.198183	-0.12286	0.0447466	0.0687016	0.232199	0.0554336	0.139218	0.244825	0.0473419	-0.0252738	0.319199	-0.158166	0.1248	0.21663	-0.278078	0.283642	-0.00163637	0.143714	0.126881
BIOCARTA_SARS_PATHWAY	-0.357894	0.194011	0.198095	0.100583	-0.177011	0.248044	0.250783	0.192777	-0.206381	0.251135	0.162477	-0.389875	0.0282731	-0.333475	0.454763	0.38586	-0.114542	0.258863	-0.540379	0.454718	-0.317005	0.0550672	-0.0866051	0.0707622	0.07552	-0.079319	-0.158795	-0.440586	0.168321	-0.10569	0.278399	-0.113632	0.116298	-0.34397	-0.010456	0.141815	0.453843	0.154131	0.439131	-0.206729	-0.033212	-0.122116	-0.401025	0.0511778	0.492396	0.219688	-0.058506	-0.090623	-0.093104
BIOCARTA_PAR1_PATHWAY	0.11488	-0.0411459	0.39015	0.121907	0.221694	-0.308177	0.00593632	-0.00615005	-0.196376	0.246248	0.289779	-0.327709	0.306456	0.126108	-0.199144	-0.164371	0.0888833	0.236044	-0.153998	-0.195417	0.267211	0.134076	0.128708	-0.116322	-0.337214	-0.0130258	0.145098	0.296906	0.0120549	0.0121261	-0.0275952	0.297545	-0.0621718	0.130137	-0.233218	-0.202032	0.152678	0.144959	-0.171497	-0.0553543	-0.134746	-0.276865	-0.165689	-0.0155966	-0.135284	-0.115806	0.275259	-0.226736	0.0208714
BIOCARTA_STRESS_PATHWAY	0.186638	-0.334976	-0.208396	-0.00250061	0.207877	0.427392	-0.155539	-0.0745008	0.338792	0.101106	-0.173117	-0.213452	0.11173	-0.322827	-0.0165978	0.118625	0.375665	-0.118393	-0.201609	0.189697	-0.0406643	-0.349027	-0.220912	0.013614	0.254628	0.111549	-0.239164	0.226367	-0.167657	-0.0641342	0.177706	-0.30334	-0.0441473	-0.194287	0.267839	-0.534389	-0.140984	-0.223587	-0.29497	0.0845595	-0.496889	0.033739	-0.0193154	0.153981	0.143957	0.0298754	-0.0928153	-0.023852	-0.0543044
BIOCARTA_TNFR1_PATHWAY	-0.175951	-0.158606	-0.0729707	0.107636	0.0215261	-0.103362	-0.136228	-0.208664	-0.0450202	0.0656843	-0.246694	0.135341	-0.0366147	0.0623154	0.10157	-0.0234729	0.225819	-0.0432629	0.194474	0.111093	0.207513	-0.175748	0.0697166	-0.146851	-0.066238	0.0292529	0.0360979	0.0728329	-0.0805293	0.171026	0.148281	-0.0200087	0.0696314	0.077154	-0.0178591	-0.37726	-0.267263	0.0447809	-0.100736	-0.0223031	-0.287721	0.147393	0.0650191	-0.0596271	0.112356	0.0570486	-0.0108699	-0.25701	-0.025668
BIOCARTA_TNFR2_PATHWAY	0.219813	-0.352763	-0.562887	-0.0414062	0.168965	0.0995313	-0.0602649	-0.144661	0.579418	-0.041848	-0.235325	-0.320632	0.345432	-0.126054	-0.177515	-0.0518724	0.549879	0.110649	-0.132163	0.132641	0.0309564	-0.410548	-0.336481	0.154752	0.0407211	0.0705017	0.102495	0.441171	-0.419623	-0.355277	-0.291199	-0.295642	-0.370886	0.0564237	-0.0173224	-0.389184	-0.28128	-0.126025	-0.366822	0.263138	-0.404863	0.232395	-0.232493	0.321813	0.156588	0.000107805	-0.0317336	-0.14618	0.0590501
BIOCARTA_TOLL_PATHWAY	0.092689	-0.216946	-0.0123883	0.031715	0.345143	-0.0440904	-0.067684	-0.0806686	0.354	-0.0441511	-0.0369041	-0.350464	0.0423089	-0.31576	-0.210418	0.0644744	0.286094	0.109133	0.092829	0.0905097	-0.0564597	-0.265626	-0.15574	-0.107845	0.11607	0.133238	0.069805	0.217749	-0.352606	0.13523	0.0772113	-0.24925	0.122164	-0.129289	0.187043	-0.326263	-0.149254	-0.11801	-0.266653	0.258561	-0.31196	0.00745434	-0.149497	0.110575	-0.0141977	-0.10836	-0.109048	-0.109151	-0.0291587
BIOCARTA_TPO_PATHWAY	-0.306137	0.140354	0.221091	0.105098	0.203048	-0.0151848	-0.0247692	-0.243771	-0.0308045	-0.00208874	0.351639	-0.281129	-0.0779122	-0.0646667	-0.172216	-0.322097	0.0998635	0.0532888	0.0721387	0.192176	0.111466	0.139651	0.0853945	-0.185754	0.123375	-0.300348	-0.13216	0.0770226	-0.0693831	-0.292437	-0.02594	0.0456426	0.269035	0.0776628	0.291729	-0.0383251	-0.31373	0.148644	-0.296036	0.0216099	0.169784	-0.49894	-0.313479	0.248584	-0.277336	-0.17205	0.0735137	-0.270224	0.169555
BIOCARTA_CREB_PATHWAY	-0.00967273	0.294826	0.328774	0.328217	0.259124	-0.160037	-0.099959	-0.308889	-0.376532	0.163643	0.12876	-0.136183	0.163782	0.203538	-0.0198851	-0.243066	0.0309215	0.366984	0.0451985	-0.146519	0.222931	0.231984	0.273899	0.0688934	-0.227478	0.358059	-0.247999	-0.111325	0.0898062	0.0853093	-0.244047	0.453326	0.0279722	0.216298	0.0860164	-0.242644	-0.10582	0.144671	-0.467642	-0.319676	-0.154776	-0.407375	-0.342636	-0.244336	-0.153429	-0.218194	0.124046	0.169451	0.0556104
BIOCARTA_CARM1_PATHWAY	-0.118466	-0.0957286	0.482131	-0.350895	-0.475601	-0.108625	0.368779	-0.065066	-0.528129	-0.338115	-0.367227	0.350622	0.0832378	0.39023	0.127235	-0.148697	0.17101	0.546696	-0.0330521	-0.202211	0.487332	-0.155985	0.29263	-0.253389	-0.440715	-0.20599	0.10438	0.186581	-0.11492	-0.114133	0.194603	0.329062	0.226037	-0.123715	0.36113	0.0558037	-0.0349019	-0.251094	-0.195532	0.071734	0.0234826	0.295705	0.130512	-0.101766	-0.369051	0.234285	-0.382641	0.291175	-0.113292
BIOCARTA_TFF_PATHWAY	-0.148833	0.0592896	0.120185	0.220552	0.286882	-0.314096	0.0625334	-0.45547	-0.283673	0.128556	-0.0149889	-0.191727	0.000208286	-0.220397	-0.310307	-0.498332	0.324046	-0.172189	0.0550596	0.104337	0.339003	0.137452	0.195514	-0.273109	-0.208733	0.291416	0.0418002	0.388544	-0.342065	-0.17666	-0.330315	0.273451	0.0928776	0.426251	-0.0644652	-0.270291	0.032525	-0.059858	-0.437241	0.0773587	-0.0296302	-0.18588	0.0188075	-0.144658	-0.00910478	0.0861565	-0.161219	-0.214037	0.219273
BIOCARTA_TRKA_PATHWAY	-0.472222	0.0998696	0.265372	0.227752	-0.146507	0.184506	-0.192477	0.0330489	-0.233963	0.374242	0.169514	-0.292557	0.0962241	0.197196	-0.0677723	-0.177374	-0.211777	0.112004	0.0233866	0.0964081	0.243212	0.264767	0.421277	0.190792	-0.40146	0.0399061	-0.0212075	0.238574	0.122378	-0.200798	-0.355325	0.300381	0.524458	0.238858	0.153943	0.0663379	-0.345498	0.314673	-0.457167	-0.447655	0.488346	-0.416211	-0.330223	-0.367344	-0.46895	0.0526409	0.377716	0.128971	0.27329
BIOCARTA_ARF_PATHWAY	-0.104529	0.099557	0.0276746	-0.300319	0.139214	0.309194	0.109674	0.424955	-0.258159	-0.343158	-0.133182	0.0427764	0.110083	0.271687	0.180786	-0.0161907	-0.0676898	0.0333909	0.126226	0.159932	0.513306	-0.348358	-0.0227776	0.281228	-0.477418	-0.197479	0.359805	0.210066	-0.282259	0.012802	0.204372	-0.211885	-0.147661	0.0829414	0.424371	0.0165652	-0.408885	0.286118	0.12495	-0.111646	0.104926	-0.348775	-0.176575	-0.128804	0.00863569	0.0581655	-0.363019	-0.137536	-0.148623
BIOCARTA_UCALPAIN_PATHWAY	0.341103	0.326794	0.0244493	0.297076	0.0207487	-0.324988	0.342903	-0.44598	-0.415456	0.231353	-0.188303	-0.443016	0.368856	0.0675524	-0.2669	-0.49979	0.214318	0.1978	-0.0353804	-0.0350166	0.0548317	-0.0100759	0.167113	0.275448	-0.190152	0.301148	0.462265	0.627964	-0.496351	0.253959	0.30122	0.239601	-0.450444	0.173082	-0.192101	-0.123921	-0.161097	-0.356536	-0.402794	0.220334	-0.125568	-0.0518626	0.0023015	-0.322928	-0.0509507	0.322939	-0.193249	-0.266265	-0.437196
BIOCARTA_VEGF_PATHWAY	0.12845	-0.0329151	0.319239	-0.203182	0.108249	0.196248	-0.20565	0.325754	-0.305335	-0.0315683	0.0904351	-0.0867254	0.0667495	0.269055	-0.0421815	0.280215	-0.252629	0.168364	-0.0663272	0.269366	0.162441	-0.036443	-0.226508	-0.291093	-0.1213	-0.358691	-0.135133	0.0800453	-0.318626	-0.192809	0.125999	0.0945525	0.149511	0.0108673	0.132705	0.146369	0.115304	0.247177	0.26367	-0.357395	0.443024	0.114117	-0.131267	-0.142227	-0.390504	-0.0525396	0.0491303	0.132828	0.115642
BIOCARTA_VITCB_PATHWAY	-0.0894373	-0.286498	-0.153131	0.147736	-0.225066	0.2372	-0.291955	0.450005	0.260469	-0.123344	-0.140669	-0.0484953	-0.0134118	-0.221257	-0.345207	-0.046415	0.175181	0.124649	-0.196944	0.138958	-0.272852	0.184575	-0.269528	0.234742	0.512839	0.117929	0.463536	0.296695	-0.271254	-0.204377	0.0532209	-0.109065	-0.57015	0.335622	-0.0319465	0.457429	-0.350109	0.12886	-0.0166264	0.0656272	-0.257839	0.339457	0.0176947	0.232026	-0.404674	0.0546115	0.406927	-0.23655	-0.314986
BIOCARTA_WNT_PATHWAY	-0.0486417	-0.0441256	0.231778	-0.172081	-0.332659	0.142728	0.418328	0.109503	-0.0652221	-0.183262	0.0273198	0.471299	-0.166308	-0.150179	0.321317	-0.00520868	0.102388	-0.0498568	0.187365	0.0115513	-0.0161427	0.0699971	0.187806	0.0161391	-0.422825	-0.291966	-0.00376405	-0.0840154	-0.258064	-0.140173	0.116556	-0.196417	0.0727015	-0.20239	0.0651136	-0.0313577	-0.188492	-0.0887619	0.362879	0.175085	0.350839	0.280619	0.138105	0.0152919	-0.0181537	-0.0346322	-0.191814	-0.280904	-0.11722
BIOCARTA_ACTINY_PATHWAY	0.186713	0.358676	0.0296094	-0.00463522	0.121323	-0.0995259	-0.0239744	0.205889	-0.065628	0.454541	0.389973	0.265004	0.0483969	0.321767	-0.346948	-0.112984	-0.0695185	-0.0226834	-0.309582	-0.378723	0.226366	0.396458	-0.205746	-0.0221401	-0.333135	-0.295212	-0.083172	0.3678	-0.491828	-0.268154	0.243575	-0.0334941	0.271308	-0.0790663	0.0618371	-0.389952	0.13165	-0.485958	-0.0808121	0.396437	-0.345419	-0.451347	0.386407	0.0172312	-0.428618	0.0431918	0.114351	0.384216	-0.0648048
ST_INTERFERON_GAMMA_PATHWAY	0.111308	0.452271	-0.257117	0.0378453	-0.103558	-0.454192	-0.0194275	0.444668	0.0884926	0.283138	-0.350158	-0.273478	-0.372805	-0.148822	-0.70777	0.18306	0.132188	-0.470889	-0.551606	-0.295071	0.244088	0.23755	0.233495	-0.390726	0.0633861	-0.52776	-0.191607	0.413507	-0.241887	-0.132915	0.0550104	-0.418847	0.251064	-0.113636	0.244184	0.044926	-0.089665	-0.0578635	0.173413	0.313313	-0.00397402	0.125991	0.0214234	0.444043	-0.410106	-0.560168	0.163119	0.537149	0.303429
ST_WNT_CA2_CYCLIC_GMP_PATHWAY	0.255676	-0.026011	-0.291105	0.331266	0.445947	0.137395	0.031232	-0.231638	0.253721	0.445534	-0.224409	-0.0553983	-0.1366	0.130761	-0.0433774	-0.1588	0.227231	-0.325719	0.0312964	-0.287874	0.218218	0.124721	0.13565	0.218173	-0.00781834	0.288673	-0.145807	-0.0964299	-0.227035	-0.334403	-0.0340026	0.0376239	-0.222844	0.104036	0.0270826	0.161648	-0.301932	-0.345532	0.19468	0.251374	0.0920628	-0.001643	0.102485	0.00961073	-0.222982	-0.484563	0.155929	-0.018238	-0.249104
ST_DIFFERENTIATION_PATHWAY_IN_PC12_CELLS	-0.0508616	-0.102309	-0.111587	0.2271	0.156216	-0.170648	-0.10161	-0.318721	-0.141703	0.0932178	0.297624	0.14668	0.0800765	-0.0928201	0.227523	-0.212105	-0.249075	0.0868704	0.011013	-0.177149	0.318578	-0.133692	0.0652996	0.0503936	-0.232202	0.152233	0.0792545	0.0576797	0.0404799	-0.0474417	-0.046767	-0.117764	0.256875	0.014831	0.243462	-0.146553	-0.453257	0.0389809	-0.147067	-0.0250613	-0.132365	0.117264	0.0493739	0.104829	0.0616553	-0.0641589	-0.0425209	0.21496	0.0143006
ST_TUMOR_NECROSIS_FACTOR_PATHWAY	0.00135058	-0.187522	-0.246784	-0.153625	0.120049	-0.0516552	0.110557	-0.192576	0.365006	0.108382	-0.16328	-0.361413	0.0409071	-0.251315	0.0450986	-0.204322	0.504309	-0.426246	0.0375448	-0.119223	0.048891	0.0140926	-0.214468	0.0610716	0.194182	0.0938158	0.12851	0.231983	-0.228453	0.0379474	0.199789	-0.296147	0.182033	0.108472	-0.156521	-0.42949	-0.160747	0.119888	-0.238374	0.351465	-0.436697	0.240347	0.0480687	0.182402	-0.0327083	0.142851	-0.0250687	-0.462899	-0.225911
SA_B_CELL_RECEPTOR_COMPLEXES	0.387727	0.235839	-0.046154	0.377802	0.48128	-0.287807	-0.279265	-0.170586	0.0619052	0.369037	0.471891	0.148533	-0.109719	-0.195206	-0.152415	0.24428	0.0014638	0.0661485	0.0923468	-0.0112817	0.257292	-0.0508051	0.127215	0.0849735	0.209162	0.264644	-0.191791	-0.16813	0.0187269	-0.258559	-0.209746	-0.102508	-0.0678418	0.0177221	0.0341408	-0.290168	-0.186916	0.00521757	-0.20472	-0.128185	-0.342596	-0.336841	-0.216941	-0.0255135	-0.0443844	-0.108433	-0.0091381	-0.163308	-0.227981
ST_ERK1_ERK2_MAPK_PATHWAY	0.322592	0.0990499	-0.137572	0.0389391	0.166352	-0.121352	-0.0756716	-0.247666	0.196516	0.22488	0.00515659	-0.147097	0.00348548	-0.195077	-0.30193	-0.0331996	0.140951	0.0130562	-0.0595322	-0.00202588	0.127557	0.158583	-0.112924	0.0214548	0.192721	0.145091	-0.165948	0.172207	-0.13235	-0.298869	-0.0420686	0.0677374	0.228165	-0.0982682	0.284353	-0.0530245	-0.171901	-0.280842	-0.0509558	0.159452	-0.316813	0.0473606	-0.0466032	0.0994843	-0.0672401	0.0959792	-0.308128	-0.158851	-0.247858
SIG_CD40PATHWAYMAP	0.0594111	0.000972074	-0.305382	-0.133655	0.192179	0.161701	0.104664	-0.3228	0.157336	0.177715	0.181962	-0.187393	0.171379	-0.151293	0.292333	-0.104929	0.0531286	-0.367896	0.295054	0.0961186	-0.0707096	-0.302086	-0.203933	-0.0469923	-0.208439	0.20333	-0.168138	-0.0475622	0.0657985	-0.0642563	-0.0246492	-0.156973	0.249517	-0.0586966	-0.133429	-0.378234	-0.311531	0.287991	-0.193594	0.206299	-0.317817	0.0970475	-0.0690223	0.275591	0.0122954	-0.174638	-0.106764	-0.113891	-0.160277
SIG_PIP3_SIGNALING_IN_CARDIAC_MYOCTES	-0.129653	0.177975	-0.0107583	0.295699	0.0658134	-0.165274	-0.0661973	-0.17044	-0.157961	0.0833594	-0.110297	0.0226803	0.00352895	0.118797	0.130749	-0.275271	-0.0415842	-0.0543974	0.0783942	0.0680156	0.243099	0.0388046	0.213356	0.126118	-0.129723	0.224202	0.241485	0.0686204	0.00728928	-0.132887	-0.224886	0.318712	0.0405012	0.15233	-0.0665053	-0.0661744	-0.00486519	0.098642	-0.382129	-0.140778	-0.0269595	-0.256342	-0.246044	-0.069006	-0.0264636	0.0290951	-0.0643924	0.121829	0.172179
SA_CASPASE_CASCADE	0.356171	-0.378654	-0.229316	0.0258766	0.31916	-0.312124	-0.17341	-0.0276676	-0.00192749	0.415292	-0.024635	0.0835156	-0.103826	-0.0804815	-0.204297	0.288648	0.477157	-0.18442	-0.162815	-0.337921	0.151004	-0.156384	-0.193234	0.15131	0.187269	-0.00967048	-0.135102	0.402826	-0.164116	-0.298963	0.207502	-0.514274	0.101872	-0.186496	-0.258036	-0.283465	0.186255	-0.37615	-0.129531	0.318743	0.0945591	0.361131	0.46296	-0.227038	-0.0180082	-0.0223093	0.224369	-0.0985896	-0.269963
ST_GA12_PATHWAY	0.0618883	-0.207542	-0.0652307	-0.248955	-0.149753	0.195294	-0.0959248	-0.472945	-0.1301	0.15346	0.112024	-0.0581972	0.0100196	0.307074	0.269247	-0.166423	0.122805	-0.0382873	0.039158	0.101558	0.0297026	0.0395619	0.0846904	-0.242032	0.085527	-0.0819283	-0.230924	0.159782	0.0585394	0.246801	-0.0318965	0.195284	-0.0980022	-0.318516	0.111098	-0.0357653	0.285291	-0.0704124	-0.30167	0.359751	-0.0559911	0.0257904	0.103987	0.235654	-0.288549	0.281517	-0.127393	-0.14749	-0.187922
ST_G_ALPHA_S_PATHWAY	0.443588	-0.00550511	-0.324209	-0.346035	-0.0350873	-0.340585	-0.2778	0.247049	-0.239795	0.278845	0.218585	0.247144	0.0266823	0.109759	0.0781158	-0.633056	-0.191132	0.455574	-0.100206	-0.420675	0.311257	-0.120477	0.066975	-0.123729	-0.167283	-0.303505	0.0953995	0.453985	-0.0522934	0.281692	0.141391	0.109119	-0.200882	-0.123215	0.341045	0.0313873	-0.481172	0.0826222	-0.0393622	-0.0714944	-0.206735	0.054394	0.257119	0.105586	-0.294106	0.0898655	-0.246832	0.338874	-0.305357
ST_G_ALPHA_I_PATHWAY	-0.121555	-0.0062154	0.0325986	0.0450278	0.137679	-0.0960036	-0.190985	-0.0720179	-0.233382	0.245028	0.0621766	0.0438056	0.196376	0.239492	0.0472317	-0.153545	0.00848098	0.0061362	-0.0785439	0.182101	0.268515	0.0868919	0.163251	0.0565828	0.0904121	0.175693	0.0238686	0.300693	-0.329408	-0.143466	0.17376	0.315397	-0.0394946	-0.0535368	-0.00475068	0.183856	-0.0892616	0.0767997	-0.249095	0.0390854	-0.0385475	0.0466658	-0.0917307	0.189488	-0.418082	-0.149678	-0.413231	-0.0371505	-0.15907
SIG_CHEMOTAXIS	-0.226337	0.172447	-0.00672642	0.274494	0.111983	-0.217094	0.0514915	-0.068179	-0.0371531	0.142809	-0.0232553	-0.0408968	0.138578	0.0789969	-0.303134	-0.114401	-0.202205	0.160348	-0.0201704	0.0789337	0.179583	0.110121	0.163279	0.218501	-0.280371	0.11289	0.137942	0.205223	-0.322191	-0.160994	0.0545659	0.195221	0.149625	0.241447	-0.121146	-0.0985803	0.100913	0.0320753	-0.290911	-0.0389008	0.00833127	-0.277112	-0.276673	-0.0449144	-0.0385	-0.0666414	-0.151036	0.38239	0.0393951
ST_IL_13_PATHWAY	0.119797	-0.238429	-0.29805	-0.0569355	-0.314374	-0.608658	-0.129352	0.228562	-0.42007	-0.0501331	0.197422	0.0994545	0.437793	0.0384673	-0.405007	-0.158004	0.677926	0.053057	0.0200743	0.094241	-0.375701	-0.538409	-0.0401224	-0.56695	0.149919	-0.0172495	0.0820611	0.203212	-0.501043	-0.229824	0.54983	-0.197416	-0.0323614	-0.172451	0.555054	-0.333278	0.55901	-0.330058	-0.454814	0.607355	-0.296577	0.105882	0.353139	0.241303	-0.0177459	0.619982	0.0805288	0.658491	-0.479521
ST_P38_MAPK_PATHWAY	0.093541	0.228207	-0.12968	-0.140267	0.339665	0.0358844	-0.0472629	0.0599382	0.145258	0.0324266	0.199094	-0.0168541	-0.0354205	-0.271373	-0.00517276	0.0842604	0.177399	-0.122223	-0.163162	-0.0846392	0.221239	-0.0369581	0.17569	-0.0949976	-0.0856218	-0.109845	-0.0528253	0.18141	0.177763	0.0286336	0.0725143	0.0920608	0.0140477	-0.301141	0.126063	-0.285206	-0.229085	0.156165	-0.196777	-0.02434	-0.110165	0.13519	-0.0291082	0.273366	-0.0584918	0.104076	-0.343053	0.0542266	-0.135644
SIG_IL4RECEPTOR_IN_B_LYPHOCYTES	-0.0929226	0.126346	-0.0769393	0.0840778	-0.015982	-0.21547	-0.0399212	-0.198658	-0.345664	0.428574	0.0379763	0.143692	-0.071949	0.187543	0.0271906	-0.405973	-0.0333188	-0.148836	0.248818	-0.0490332	0.275854	-0.072235	0.173553	0.0265292	-0.0848678	0.199429	0.0928108	0.126752	-0.269374	-0.297656	-0.116899	0.323986	0.204352	0.240652	-0.0654054	-0.188471	0.169085	-0.0182274	-0.430225	-0.0941936	-0.0336811	-0.0272666	-0.339466	0.153339	-0.0491943	0.0342568	-0.199274	0.238928	0.0979831
WNT_SIGNALING	-0.151202	0.0902843	0.0767823	0.0367263	-0.138385	0.261564	0.223943	0.110363	0.146787	-0.0692985	-0.048545	0.169811	0.013935	0.115012	0.136442	0.0806198	0.249145	-0.0717477	0.0969745	0.086249	0.167613	-0.0926144	0.125408	-0.205512	-0.188343	-0.00194348	0.132858	-0.0105563	-0.232884	-0.248336	-0.0584683	-0.0178966	-0.0124359	-0.0614558	-0.079159	0.0395383	-0.168686	-0.0584839	0.151343	0.166158	0.0255191	0.0662175	0.118975	-0.0412129	-0.0315121	-0.119605	-0.0631168	0.00983069	-0.287124
ST_JAK_STAT_PATHWAY	0.0635711	0.0280232	-0.00338811	0.112893	0.0442577	-0.412232	0.541957	-0.0517178	-0.0666136	0.0378393	-0.261923	-0.441357	-0.42781	0.0750123	-0.626279	0.192999	0.430007	-0.344578	-0.0382642	-0.237634	0.111662	-0.214015	-0.103718	-0.589584	0.0210811	-0.129725	-0.242017	0.432502	-0.186074	-0.186024	0.0333405	-0.229195	0.485838	-0.141762	0.480148	-0.405893	0.363756	0.190158	0.0407005	0.276882	0.0178244	0.0417864	0.387157	0.420645	-0.463836	-0.132188	0.346876	0.381152	-0.202972
SIG_REGULATION_OF_THE_ACTIN_CYTOSKELETON_BY_RHO_GTPASES	-0.185684	0.449356	-0.106896	0.101901	-0.0406151	-0.421504	0.156738	0.0256032	0.0186122	0.0985879	-0.0515454	-0.028024	0.0840054	0.118515	-0.27073	-0.11349	-0.111055	-0.176949	0.121132	-0.0153712	0.114458	0.119955	0.235956	0.148259	-0.276943	0.145679	0.257866	0.294862	-0.273619	0.0886928	0.317501	-0.0158124	0.148631	0.185688	-0.0887113	0.106644	0.0661711	-0.083528	-0.210428	0.0382712	-0.166219	-0.265717	-0.110194	-0.218015	0.126425	-0.258095	-0.375638	0.458985	-0.140312
ST_GRANULE_CELL_SURVIVAL_PATHWAY	0.17515	-0.231859	-0.0561058	0.219095	0.288744	-0.0335714	-0.224891	-0.377564	-0.124641	0.248617	0.222829	0.215367	0.0370798	0.233034	0.35204	0.0892778	0.071334	0.185434	0.145575	0.101794	0.291104	-0.345889	0.161589	-0.30239	-0.355057	0.251447	0.128287	0.00630311	0.0766166	0.184974	-0.274468	-0.104471	0.027757	0.302644	0.301802	-0.249007	-0.477415	0.105569	-0.308431	0.0176772	-0.14081	0.191934	-0.188356	0.316388	-0.23692	-0.113744	-0.175098	0.228421	-0.336266
ST_ADRENERGIC	-0.0578222	0.00118457	-0.209233	0.00780722	0.151249	0.166437	-0.149687	-0.107697	-0.380294	0.461233	-0.0896912	0.158274	0.295099	-0.109269	-0.112888	-0.173538	0.10428	0.281931	0.321149	0.0718673	0.272734	0.193909	-0.104434	-0.0525652	-0.186852	0.00162	-0.015262	0.405445	-0.30037	-0.162486	-0.113829	0.240808	-0.0128784	-0.113543	-0.0139876	-0.174524	-0.19961	0.172638	-0.270879	0.0894483	-0.104231	-0.034713	-0.179468	0.0175879	-0.163253	-0.0973452	-0.253363	-0.0737513	-0.101097
ST_INTEGRIN_SIGNALING_PATHWAY	-0.244423	0.257069	-0.04486	0.0120529	0.0899191	-0.184618	0.0421928	-0.0220859	-0.106408	0.185663	-0.0165515	-0.0145167	-0.0576311	0.195704	0.0143834	-0.21137	-0.14898	0.0464472	-0.111103	0.11656	0.215401	-0.123779	0.173385	-0.0843827	-0.206283	0.209107	0.206107	0.311019	-0.134667	0.0982051	0.0932778	0.226489	-0.0393591	0.102349	0.0724147	0.0699969	-0.159575	-0.0456393	-0.132097	-0.180847	0.118836	-0.150748	-0.0995667	-0.0840072	-0.175965	-0.0989004	-0.136005	0.305814	-0.204889
ST_GAQ_PATHWAY	0.0127012	-0.338809	-0.284898	0.227851	0.122887	0.268336	0.0694034	-0.144504	0.233826	0.201064	-0.127058	-0.206454	0.108208	-0.172824	-0.0792267	-0.110192	0.36835	-0.371395	0.225309	-0.0574783	0.218324	-0.0596522	0.0235861	0.0832005	-0.052596	0.13286	-0.00194645	0.430171	-0.323621	-0.332549	0.0642621	-0.0218819	-0.138768	0.0407548	0.0131451	-0.141003	-0.161349	0.0348547	-0.358649	0.176596	0.0533294	0.138311	-0.0772924	0.215474	-0.165758	-0.0200823	0.0850243	-0.124698	-0.151589
ST_GA13_PATHWAY	-0.262098	-0.156652	-0.189896	0.104867	0.143464	-0.059872	0.246498	-0.111856	0.0934242	0.0885586	-0.0396403	-0.19868	0.198832	-0.00848242	-0.137945	-0.0762147	0.11722	-0.168651	-0.177665	-0.0130081	0.111481	-0.132741	-0.0502939	0.181513	-0.165105	0.260241	-0.129604	0.187064	-0.226539	-0.0330567	0.00954609	0.0595016	-0.107217	0.0553338	-0.121298	-0.0467276	-0.110796	-0.048536	-0.229336	0.111139	-0.0518712	-0.0643823	-0.0721847	0.0209277	0.0978247	0.139112	-0.165137	0.126114	0.0525292
ST_STAT3_PATHWAY	0.0948349	0.341995	-0.237581	-0.0804373	-0.110828	-0.399384	0.0704129	0.0934913	0.139435	0.232596	-0.475835	-0.341432	-0.304257	0.215838	-0.497117	-0.167882	0.277993	-0.313633	-0.440194	-0.0155815	-0.0720565	-0.0958062	-0.112373	-0.487326	0.42976	-0.100016	0.0103133	0.373527	-0.185221	-0.390585	0.410683	-0.204581	0.293003	-0.064607	0.539767	-0.337822	0.0189152	-0.0392294	-0.176064	0.279832	-0.00291057	0.224977	0.0439199	0.361635	-0.2833	-0.281362	0.249892	0.187643	-0.00170085
SA_FAS_SIGNALING	0.455239	-0.140129	0.0275172	0.253238	0.505335	-0.644258	-0.421717	-0.323228	0.500094	0.531654	-0.503354	-0.238703	0.150958	-0.172765	-0.273972	0.0321193	0.592704	-0.66678	0.161745	-0.481712	-0.149869	0.491922	0.0791278	0.290204	0.292319	0.356904	-0.0325483	0.127256	-0.299773	0.281244	0.116207	-0.483711	0.256478	0.168318	-0.317063	-0.736205	0.472102	-0.431929	-0.704521	0.0627452	-0.179903	0.15841	-0.19507	0.129208	-0.0106647	0.0822728	0.211725	0.136641	-0.00440019
SA_G1_AND_S_PHASES	0.0418695	0.311675	-0.293766	0.341791	0.114113	0.172657	-0.338852	-0.167539	-0.365077	-0.228948	0.109391	0.317073	0.228096	0.33415	0.488048	-0.0719238	-0.150563	-0.47989	0.516391	0.509025	0.167069	0.360345	0.33499	0.335286	-0.350735	0.611476	0.489412	0.0866118	-0.229564	-0.0739197	-0.17161	0.151625	-0.462488	0.500136	-0.128411	-0.081219	-0.29609	-0.0638175	-0.492779	-0.47722	-0.12229	-0.0286702	-0.495705	-0.506022	0.572344	0.0401899	-0.245105	-0.503257	-0.0158672
SIG_INSULIN_RECEPTOR_PATHWAY_IN_CARDIAC_MYOCYTES	-0.0799734	-0.0553711	-0.099842	0.248747	0.201099	0.0510618	0.198949	-0.327475	-0.189515	0.0198516	-0.0613254	-0.114174	0.0898172	0.145138	-0.0945244	-0.309445	0.00364543	0.0211475	0.10254	-0.215746	0.13562	-0.0927805	0.165613	0.144189	-0.0118796	0.319103	0.211669	0.124922	-0.0390658	-0.108336	-0.240523	0.304052	0.0532924	0.0898635	-0.0930693	-0.198654	-0.168367	-0.0669721	-0.388444	0.019381	-0.122233	-0.166089	-0.145122	0.0511515	-0.113044	-0.166006	-0.134436	-0.0299818	0.186441
ST_T_CELL_SIGNAL_TRANSDUCTION	0.0357567	-0.0845339	-0.0474925	0.00978088	0.0699716	-0.0124947	-0.0787008	-0.270627	-0.181369	0.230804	-0.162156	0.0540217	-0.150306	-0.056213	0.20537	-0.311668	0.223213	-0.0463135	0.356101	0.203193	0.185847	0.0641084	0.238294	-0.0967614	-0.043879	0.125016	0.0938975	-0.132802	-0.107788	-0.25426	0.385249	0.150129	-0.113326	-0.01421	0.110616	-0.0885024	0.183555	-0.0344076	-0.428088	0.20875	-0.0376747	0.0569192	-0.168819	-0.153167	-0.0159231	0.000455195	0.00512649	-0.123654	-0.0856531
ST_TYPE_I_INTERFERON_PATHWAY	0.350793	0.0131832	-0.466118	0.279253	-0.151181	-0.567999	-0.00441166	0.0274747	-0.189636	0.129654	-0.464553	-0.305658	-0.48913	0.346649	-0.728881	0.274459	0.230928	-0.430301	-0.167822	0.295878	-0.209454	0.0423783	0.0837437	-0.677134	0.419378	0.161702	-0.286922	0.669024	-0.705594	-0.0839857	0.0847282	-0.573637	0.295369	0.451595	0.150813	0.105402	0.329214	-0.182921	-0.308664	0.0556653	-0.366343	-0.117279	-0.0179471	0.184767	-0.470844	-0.115414	0.302477	0.591693	0.0251541
ST_PAC1_RECEPTOR_PATHWAY	0.718888	-0.416012	-0.428436	0.62003	0.182358	-0.291416	-0.177448	-0.487769	-0.669571	0.449581	-0.204021	0.337326	0.135441	-0.286915	0.310639	-0.267102	0.386837	0.0966012	0.476765	-0.474761	0.496712	-0.327538	0.373544	-0.0523093	0.1328	-0.267825	-0.0525348	0.569218	-0.465017	-0.138978	-0.0548553	-0.119743	-0.601147	0.127045	0.0628918	-0.177628	-0.182187	-0.00133623	-0.491913	0.253039	0.256086	0.674202	-0.0832425	-0.0583903	-0.176765	-0.027161	-0.440315	-0.24613	-0.274348
SIG_PIP3_SIGNALING_IN_B_LYMPHOCYTES	0.115085	0.150034	0.144178	0.309822	0.321552	-0.0437104	-0.158428	0.275521	-0.192088	0.226662	-0.127389	0.259835	-0.0795761	-0.169815	-0.188947	-0.228755	0.110854	-0.261487	0.0677729	0.0462278	-0.105148	-0.276759	-0.0728591	0.279345	0.0974097	0.179557	0.0549777	0.0815079	-0.0725118	-0.173999	-0.0430869	0.176433	-0.231556	0.162953	-0.267326	0.116171	0.177302	0.0892797	-0.26491	-0.0391643	0.133834	0.0353996	-0.112908	-0.10239	0.0194398	0.048089	-0.0194856	0.00283219	0.0219675
SIG_BCR_SIGNALING_PATHWAY	-0.0447368	-0.00896574	0.157653	0.339784	0.328823	-0.227205	-0.0342948	-0.322131	-0.291535	0.255143	0.0453771	-0.0293421	0.0302171	-0.0898137	-0.143349	-0.413053	0.182972	-0.0754335	0.317184	-0.159273	0.12887	0.108376	0.283425	0.23107	0.048193	0.299536	-0.148435	0.0240569	-0.239727	-0.11001	0.0704705	0.221832	-0.0850932	0.0879704	-0.0851071	-0.123531	0.239758	-0.117847	-0.392933	-0.131608	-0.0551401	0.0915195	-0.208964	-0.111382	0.0422343	0.0132666	0.0421375	-0.128608	0.0627539
SA_G2_AND_M_PHASES	-0.304326	-0.512749	0.482515	0.597318	0.229328	-0.108053	-0.132326	-0.24975	-0.419712	-0.0275665	-0.48921	-0.157963	0.58976	0.14531	-0.292747	-0.380165	0.295625	0.201559	0.153222	0.220945	0.45978	-0.243675	0.277642	0.265089	-0.332994	-0.0306713	0.0492592	-0.564865	0.281826	-0.0345238	-0.044572	-0.196822	0.283247	0.111449	-0.0685319	-0.510291	0.507241	0.0918497	0.349474	-0.444645	0.00939314	0.447876	-0.546477	-0.318466	-0.245275	-0.00372128	-0.418887	-0.28296	0.387393
ST_B_CELL_ANTIGEN_RECEPTOR	0.0530922	-0.0477027	-0.10074	0.222745	0.224762	-0.0187684	0.172189	-0.319736	-0.127558	0.20265	-0.0722574	-0.0749738	-0.021801	-0.0983255	-0.016431	-0.288946	0.166715	-0.135226	0.163943	0.0259875	0.115433	0.125923	0.157152	-0.051368	-0.118745	0.362502	-0.196294	0.00752171	-0.289099	-0.262857	0.0478974	0.140527	-0.135755	-0.0220472	0.147122	-0.0483511	0.0275085	-0.0369592	-0.374632	0.114726	-0.00266337	0.246489	-0.116201	-0.0997172	0.0406868	0.249517	-0.026799	-0.100947	-0.054064
ST_INTERLEUKIN_4_PATHWAY	-0.193738	0.132259	0.20289	0.0531615	0.140407	-0.363108	-0.151847	0.239779	-0.297818	0.0870207	-0.248224	0.0575807	-0.0675475	0.175441	-0.244936	-0.334337	0.154226	-0.300343	-0.0317248	0.158206	0.0790044	0.108908	0.41508	-0.030921	0.0998889	0.290154	-0.116424	-0.120834	-0.290916	-0.292471	-0.136129	0.36516	-0.026579	-0.0145074	-0.0711997	0.144209	-0.016336	-0.230975	-0.360315	0.216955	0.215749	0.230627	-0.254142	-0.0358769	-0.157196	0.195599	-0.238824	0.0226424	-0.099668
ST_WNT_BETA_CATENIN_PATHWAY	-0.172223	0.285021	-0.117871	0.0340418	0.134326	-0.0591878	0.229671	0.0409235	-0.235585	0.0937562	-0.0283193	0.143013	-0.298444	-0.0250025	0.0764204	-0.361557	0.0866441	-0.0523536	0.277579	0.105392	-0.349618	0.0375418	-0.21446	0.0925204	-0.112197	0.184362	0.333641	0.203292	-0.0598528	-0.0243032	-0.263643	0.429969	0.328883	0.145324	-0.305437	0.287368	-0.0982042	0.0559116	-0.137351	0.0818452	0.275634	-0.251422	-0.27183	-0.226559	0.0655491	-0.198859	0.0319718	0.116069	0.118447
SA_MMP_CYTOKINE_CONNECTION	0.0194526	-0.109907	-0.309887	0.0527958	-0.0508113	-0.0369642	0.153005	0.154177	0.519576	0.357211	0.0737621	-0.201761	-0.0926472	-0.129753	0.318408	0.202471	0.166943	-0.0657598	-0.216219	-0.00215382	0.238516	-0.198668	-0.48227	-0.36814	0.252012	-0.244389	-0.230714	0.472186	-0.170428	-0.075863	0.341629	-0.529939	-0.142613	-0.0545031	-0.0143567	-0.374152	0.341304	0.163787	0.157301	0.104703	-0.189573	0.463816	0.0321949	0.197501	-0.0672792	0.43701	-0.228441	0.0275521	-0.42526
ST_JNK_MAPK_PATHWAY	-0.26818	0.0327452	0.177803	0.288017	0.281365	-0.249058	-0.208296	-0.223425	0.069825	0.0247744	0.136447	-0.0767609	0.206386	0.0536034	0.0694472	0.12764	0.00938554	-0.105913	-0.0789138	-0.213578	0.109833	-0.220729	0.186668	0.219972	-0.187157	0.164361	0.0395208	-0.0432148	0.167557	0.0302919	-0.31159	0.152848	0.229159	-0.0106097	-0.0644494	-0.126489	-0.321754	0.00488086	-0.15707	-0.0887669	-0.263671	-0.147996	-0.0847225	0.0143641	-0.0312599	-0.0598726	0.0553598	0.262253	0.127539
SA_PROGRAMMED_CELL_DEATH	-0.104222	-0.234996	0.278555	-0.118771	0.11275	0.102585	-0.230417	-0.373766	0.114708	0.351182	0.251245	-0.229186	0.092216	0.314323	-0.156107	-0.748339	0.139453	-0.63815	0.44163	-0.418306	0.0695582	0.207335	0.0796886	-0.0630869	0.0246364	0.617586	-0.0244007	-0.135379	0.0670152	0.352589	0.373847	-0.162235	-0.196651	0.0166935	0.189118	-0.468332	-0.0634343	-0.367983	-0.639491	-0.27032	0.0770497	-0.155699	-0.185991	-0.23116	0.510283	0.14242	-0.203343	-0.383142	0.396746
ST_FAS_SIGNALING_PATHWAY	0.0305633	-0.0721853	-0.27483	0.00976904	0.102348	0.00445325	-0.0454005	-0.0602599	-0.0839784	-0.0166873	-0.00767058	-0.0948605	0.215433	0.101744	0.226854	-0.156519	0.0154001	-0.320495	0.249484	-0.0946573	0.189227	-0.125281	-0.013917	0.116001	0.0429706	0.196662	0.19773	0.0915133	-0.116585	0.0730687	0.164718	-0.220427	0.000322134	-0.0059864	0.0139258	-0.106258	-0.347054	0.159289	-0.172671	0.0797047	-0.311648	0.182533	0.0295597	-0.0262838	-0.00440656	-0.165783	-0.0739925	-0.24827	-0.0768312
ST_MYOCYTE_AD_PATHWAY	0.103235	-0.16577	0.10357	0.270085	0.123128	-0.24941	-0.178012	0.156034	-0.351276	0.385103	-0.342814	0.27064	0.263348	0.238627	0.0525481	-0.161353	0.073455	0.387632	0.325866	-0.118855	0.435564	0.124806	-0.190014	-0.00255456	0.219443	-0.0195449	-0.388429	0.429357	-0.35104	-0.324822	0.0698985	0.274649	0.0151665	0.0521709	-0.0648761	-0.128916	0.0402607	0.194072	-0.309966	0.0860658	-0.0623444	0.00531356	-0.279925	0.0455688	-0.241792	-0.204672	-0.246439	-0.0827143	-0.115419
SA_PTEN_PATHWAY	-0.13998	-0.00315576	0.165065	0.159425	-0.0409614	0.0228147	0.357805	-0.0368773	-0.143817	-0.0589151	0.284164	-0.260666	-0.40311	-0.0585458	0.175692	-0.388547	-0.152646	-0.159367	0.0491965	-0.039276	-0.0848092	-0.259028	0.137405	0.177991	-0.13138	0.304433	0.0370563	0.247732	-0.0316738	-0.0967164	-0.0758448	0.293956	0.256443	0.317909	-0.346985	0.0404856	-0.227658	-0.0617921	-0.539458	-0.276858	-0.0780898	0.0969335	0.153496	-0.286262	0.194037	0.0371533	-0.00178299	-0.00819671	-0.0511756
SA_REG_CASCADE_OF_CYCLIN_EXPR	-0.118143	-0.292484	-0.278895	0.432107	0.220746	0.267914	-0.313305	0.11669	-0.578737	-0.148986	0.129594	0.575294	0.276997	0.413898	0.413106	-0.0898552	0.0286066	-0.144363	0.405348	0.659995	-0.0266193	0.196414	0.116874	0.332191	-0.52309	0.343075	0.642991	-0.0658443	0.194905	-0.0523755	-0.353568	-0.00622088	-0.13184	0.410674	-0.40371	0.0548335	-0.165408	-0.00036387	-0.445685	-0.649665	-0.237042	-0.272802	-0.564467	-0.672846	0.618393	-0.0725145	0.0316936	-0.272996	0.383517
SA_TRKA_RECEPTOR	-0.369007	0.131338	-0.173433	0.294267	-0.116714	0.134585	0.244464	0.0291394	-0.289386	0.0596236	0.10245	-0.0346842	0.180134	0.000765782	0.109138	-0.0600458	-0.262813	-0.323542	0.341092	-0.115127	0.105758	0.154142	0.343954	0.101023	-0.321125	0.384978	0.192155	0.0142546	-0.318943	-0.197117	-0.490918	0.38243	0.155106	0.280583	-0.0766776	0.200996	-0.196232	-0.186946	-0.306779	-0.337758	0.373197	-0.0719166	-0.286672	-0.267652	-0.174628	0.15408	0.195843	0.181305	-0.0926761
ST_PHOSPHOINOSITIDE_3_KINASE_PATHWAY	-0.218788	0.0613983	-0.0819013	0.293487	0.164781	-0.195231	-0.0530921	-0.0742541	-0.25438	0.0206704	0.0743137	0.0371688	0.0509047	0.303907	-0.0268031	-0.4843	-0.0920055	-0.21445	-0.0135779	-0.0318279	0.32611	0.10773	0.228936	0.243868	-0.148929	0.207998	0.0611848	-0.0120907	-0.0247209	-0.0516488	-0.364396	0.312454	0.0436796	0.224545	-0.0766754	-0.136315	-0.104113	-0.0864476	-0.339099	-0.10982	0.122197	-0.0507446	-0.30091	0.0391593	-0.0931244	-0.0768524	-0.0962306	0.0155117	0.312247
PID_FANCONI_PATHWAY	-0.212002	-0.32558	0.0105026	0.325761	-0.0551721	-0.0186015	-0.193089	0.0989702	-0.577035	-0.301842	0.102082	0.329143	0.306067	0.185309	0.0347208	0.178929	0.0203669	0.331164	-0.0908448	0.319381	0.223391	-0.0918496	-0.0141739	0.213157	-0.448226	-0.191331	0.0913661	-0.343399	0.43596	0.251515	-0.0933959	0.195328	-0.0261761	0.170903	-0.162731	0.187094	0.386248	0.402982	0.135234	-0.390729	0.00977392	-0.0735999	-0.288501	-0.521552	0.162213	0.100675	-0.0130046	0.0277543	0.363348
PID_SMAD2_3NUCLEAR_PATHWAY	0.1053	-0.149102	-0.00226019	0.149269	-0.0104794	-0.0450819	-0.0984562	-0.0461177	-0.19024	-0.0348741	-0.0541742	0.195156	-0.0830867	0.108125	0.164934	0.0581091	0.188807	-0.0568157	-0.0375938	0.282067	0.265273	0.0118378	-0.118799	-0.111292	-0.183242	0.182659	0.159423	0.271608	0.0250031	-0.0736998	-0.0461412	-0.0394652	-0.219992	-0.0682446	0.133166	-0.20147	-0.0608545	-0.163267	-0.174891	-0.0129955	0.00604213	0.0868061	-0.114411	-0.18671	0.156455	0.187785	-0.173459	0.0136998	0.109766
PID_FCER1_PATHWAY	-0.161494	0.0629597	0.0185661	0.154656	0.117011	-0.0304582	-0.0244271	-0.125881	0.0356869	-0.0708075	0.159682	-0.196539	-0.0317861	-0.15586	-0.123346	-0.244043	0.210273	0.119383	0.0237064	0.178421	0.103581	-0.0801285	0.177656	-0.0807125	-0.0840269	0.266235	0.173171	-0.0082001	-0.0391862	-0.228077	-0.0294415	0.1382	-0.0455295	0.240389	0.200101	-0.296785	-0.15999	0.0179612	-0.158635	0.0850049	-0.0818269	0.0978953	-0.304409	0.15333	-0.0358697	0.0395921	-0.0951492	-0.200935	0.021462
PID_ENDOTHELIN_PATHWAY	0.105788	-0.16652	0.0116501	0.226321	0.243431	-0.0829237	0.134446	-0.164216	-0.125596	0.297983	0.101969	0.0480055	0.335524	0.222032	0.0386509	0.0579064	0.274836	0.136971	-0.00226239	-0.0731892	0.0785466	-0.0836176	-0.147195	0.0294219	0.064865	-0.0219809	-0.0265392	0.221984	-0.259744	-0.0499206	-0.0129669	0.168677	0.0957204	0.120084	0.0138633	-0.0155603	0.0222013	0.0383048	-0.0730589	-0.163914	-0.259054	-0.180047	-0.186128	-0.00907877	-0.120059	-0.155566	0.142854	-0.0101343	-0.139324
PID_BCR_5PATHWAY	0.0796583	-0.167127	0.148077	0.294681	0.353299	-0.244586	0.069818	-0.253363	-0.0179718	0.152613	0.175082	-0.10667	-0.00622302	-0.130881	-0.183664	-0.20673	-0.0187954	-0.118443	0.051556	-0.211782	0.178704	0.167455	0.157824	0.243597	0.0629328	0.280421	0.0232513	-0.0467315	-0.0660629	-0.193077	0.0848696	0.0191335	-0.0885874	-0.116432	0.158866	-0.321854	-0.106566	-0.0690564	-0.330593	0.0083423	-0.212333	0.0939731	-0.159998	0.0029127	-0.0354087	-0.0945419	-0.071884	-0.0927825	0.118816
PID_PRL_SIGNALING_EVENTS_PATHWAY	0.424464	-0.192334	-0.0852008	0.444227	0.43636	-0.0911872	-0.247498	-0.0769567	-0.280286	0.0894296	0.121301	0.0450398	-0.0393914	0.155304	-0.0494299	-0.252122	0.35298	-0.0673132	0.0338672	0.169217	0.0922257	0.3249	0.171156	0.0369989	0.207561	0.271467	0.0267722	0.32455	-0.250564	0.0780299	-0.0272347	0.144689	-0.342589	0.126389	-0.257515	-0.242371	-0.264747	-0.140694	-0.398378	-0.277372	-0.0792072	-0.125657	-0.196579	-0.0559166	-0.0517415	-0.118818	-0.000990513	-0.130608	-0.190133
PID_RHOA_PATHWAY	0.0922158	0.294883	0.0841183	0.161469	0.188647	-0.305516	0.0990626	-0.0927244	-0.0646292	0.0621461	0.0360361	-0.162254	-0.0131898	0.0851057	-0.215655	0.0602467	0.111762	-0.21339	-0.18431	0.015383	0.181341	-0.161937	0.0374292	-0.252757	0.141994	0.159455	0.22723	-0.0485402	-0.20983	0.00883198	0.00936045	0.27814	-0.0401276	-0.16015	-0.10254	-0.0648377	-0.156833	-0.220437	-0.152314	0.199676	-0.263538	-0.203147	0.231409	-0.0620735	-0.00890241	-0.1221	-0.257565	0.129953	0.0574184
PID_ERBB4_PATHWAY	-0.0757621	0.0707648	0.102543	-0.0052689	-0.00442414	0.128236	0.0548647	-0.0480107	0.176099	-0.0209084	-0.00390425	-0.132519	0.0899041	0.0172968	-0.0854587	-0.0185109	-0.0528753	0.0734687	-0.219533	0.240117	0.149388	-0.0614445	0.0271475	0.0334652	-0.179803	-0.141599	0.204944	0.231858	0.0698611	-0.122871	-0.262054	-0.093692	0.0413881	-0.194173	0.244319	0.0605361	-0.223426	0.185679	-0.188769	0.035379	-0.124577	-0.0823586	0.346933	0.256811	-0.196736	0.0306598	-0.0306127	-0.141435	-0.298536
PID_AURORA_B_PATHWAY	-0.255428	-0.0582428	-0.0689151	0.195173	-0.0753027	0.0382556	0.19101	-0.230653	-0.338481	-0.362398	-0.509942	0.359342	0.224682	0.482694	-0.29217	0.227852	0.254421	0.286723	-0.102441	0.288299	0.0531829	-0.152881	0.013231	0.19932	-0.203739	0.0472116	0.264011	-0.0556889	0.017217	0.314723	-0.161837	0.219534	-0.144126	0.0450398	-0.546968	-0.106516	0.281432	0.0464845	0.204608	-0.468942	-0.323583	-0.129269	0.102645	-0.612018	0.0555712	-0.294729	-0.281237	0.245802	0.392011
PID_LYSOPHOSPHOLIPID_PATHWAY	0.0670892	-0.0748254	-0.160291	0.148529	0.162619	-0.107991	-0.0419598	0.0477603	-0.196842	0.347786	-0.0137765	0.19215	0.309968	0.319596	0.0248808	-0.0187461	0.218776	0.0331273	-0.0442078	-0.000931821	0.15447	-0.0774514	-0.0797098	0.102016	-0.220449	-0.094003	0.0274428	0.197965	-0.174327	-0.120798	-0.1516	0.112712	-0.0748295	0.200355	0.0235512	-0.208734	-0.0882525	-0.0657286	-0.145787	-0.10373	-0.243586	-0.134657	-0.272312	-0.0682268	0.0510146	0.00243745	0.206264	0.237934	-0.179367
PID_INSULIN_PATHWAY	-0.314795	0.133038	0.167063	-0.092153	-0.107974	0.0018373	0.220407	0.0733352	-0.0214501	0.157661	0.089758	0.00652108	0.171857	-0.1538	-0.186263	-0.246004	-0.101895	-0.293531	0.0644758	0.0607636	-0.0946139	0.0646132	0.106496	0.163071	-0.11812	0.296425	0.109569	-0.0963545	0.093057	-0.330422	-0.202344	0.147569	0.150604	-0.0202523	0.262312	-0.161559	-0.0861514	-0.215244	-0.129444	0.21415	-0.0781131	-0.318852	-0.0199694	0.338317	-0.0649443	3.68e-05	-0.169397	0.0182748	0.13388
PID_NOTCH_PATHWAY	0.0794915	-0.0319019	0.0306615	0.15977	0.150762	-0.118309	0.00998254	-0.312748	-0.0195983	0.1425	0.0173054	0.144936	0.129504	0.154642	0.25151	-0.198834	0.0985625	-0.0179514	0.0671242	-0.0649196	0.024776	0.0843559	-0.121262	0.0410749	-0.0666067	0.115832	0.260325	0.0128318	-0.0274207	-0.0473849	-0.0501436	0.317652	-0.0814193	-0.193757	-0.137052	0.0495344	-0.0225626	-0.0422587	-0.0836493	-0.057184	0.0673685	0.125619	-0.0605925	0.0551771	0.0814788	0.0546381	-0.142154	-0.0707519	0.0864849
PID_INTEGRIN1_PATHWAY	0.309849	-0.105166	0.00157371	-0.115041	0.0164788	-0.171693	0.183018	0.239318	0.488268	0.207666	-0.204842	-0.0156059	-0.110583	-0.0881231	-0.289969	-0.0749019	0.433423	-0.340824	-0.0482877	0.0283241	0.231989	0.0496299	-0.199529	-0.0114904	0.148358	0.0142616	0.151765	0.531134	-0.238251	-0.165995	-0.0765813	0.0598437	0.109696	0.0984572	0.244608	0.106844	-0.0730466	0.0958389	-0.214935	0.277952	-0.0292175	-0.0958927	-0.0432191	0.167252	-0.282059	0.0994271	0.154827	-0.0121358	-0.173961
PID_P73PATHWAY	0.0525994	0.106964	0.0831231	0.120101	0.0662431	0.136936	-0.0336434	-0.03908	-0.201438	-0.0777263	-0.294901	0.151692	0.0708526	0.1765	0.0694395	-0.0262394	0.252548	-0.222221	0.201695	0.113164	0.297322	-0.0632562	0.205193	0.0825876	0.106295	-0.0800977	0.153048	0.0754908	-0.0477302	-0.107423	-0.0575362	0.00529358	-0.325395	-0.264314	0.0889351	-0.0754391	0.126324	0.0782191	-0.0945078	-0.130912	-0.122244	-0.0945812	-0.000300377	-0.179331	0.00617786	0.0454984	-0.0502047	0.0415827	-0.0788023
PID_P38_MKK3_6PATHWAY	-0.190297	0.24341	-0.184064	0.151791	0.325792	0.0580576	-0.0992786	-0.146558	-0.200807	0.262445	0.322	0.0984771	0.255278	-0.103514	-0.225144	-0.251008	-0.100225	0.0081139	-0.064887	-0.285645	0.14904	-0.0390925	0.0809616	-0.00151189	-0.323923	-0.084102	0.123554	0.0837554	-0.190798	-0.00470494	-0.0355187	0.261063	-0.115467	-0.0220873	-0.143253	-0.22233	-0.129092	0.050287	-0.382745	-0.116655	-0.187414	-0.126294	-0.103652	0.414759	-0.122588	0.116279	-0.0234932	0.00202199	-0.126954
PID_GMCSF_PATHWAY	-0.0222112	0.180025	0.02629	0.187645	0.294091	-0.155926	0.0903492	-0.157675	-0.0345629	0.041257	0.0250478	-0.152817	-0.053307	-0.0802976	-0.292279	-0.0779256	0.0324489	-0.0477508	0.0751146	-0.0605442	-0.0247838	0.142822	0.0742083	-0.114162	0.242381	0.336145	0.0783549	0.0846094	-0.276009	-0.271636	0.0696943	0.124632	0.0464597	-0.0249771	0.14582	-0.128161	-0.306819	0.117543	-0.286242	0.125991	-0.0170708	-0.193687	-0.183564	0.127569	0.0788484	-0.0284661	-0.226363	-0.0864309	0.28306
PID_WNT_NONCANONICAL_PATHWAY	-0.0944339	0.0431324	-0.198192	0.0598011	-0.0128736	-0.314959	0.218559	0.049628	-0.177391	0.114479	-0.239596	-0.227406	0.13143	-0.0650504	0.280077	-0.180274	-0.0210839	0.194806	-0.137759	0.056992	-0.125985	-0.182254	0.127127	-0.0754716	0.106771	0.0764824	0.17086	0.0500926	-0.176883	-0.185372	0.0463067	0.391268	0.272386	0.049475	-0.0329286	-0.218172	-0.0435962	-0.199533	0.096743	-0.0359196	-0.224627	-0.00942691	-0.0390314	0.111951	-0.239369	0.0618696	0.156989	0.0554029	-0.0402427
PID_NFKAPPAB_ATYPICAL_PATHWAY	0.125941	-0.269212	-0.222769	-0.143985	0.391704	0.252053	0.0276411	0.105077	0.0861699	-0.00050938	-0.0534246	-0.105428	-0.033516	-0.177806	0.0397469	-0.298334	-0.15796	0.327745	-0.0962639	0.207454	-0.103231	0.209745	0.151188	-0.0421549	-0.108365	0.235767	0.387826	-0.0544199	0.176765	-0.149207	0.0455513	0.21004	-0.239077	-0.217595	0.232617	-0.0371242	-0.497686	-0.0786235	-0.277675	-0.148322	0.097183	-0.214231	-0.265492	0.122505	-0.120231	0.241038	-0.240234	-0.241702	0.136436
PID_IL4_2PATHWAY	0.073612	0.167982	0.0377647	0.0212463	0.18029	-0.094534	-0.16915	0.170084	-0.110975	0.12402	-0.195562	0.0202204	-0.0244058	0.0344661	-0.100885	-0.00330863	0.0661112	-0.28401	0.124278	0.107052	-0.0990521	0.043864	0.0616309	0.0128014	-0.00497841	0.345034	0.13955	-0.0698148	-0.278782	-0.163382	0.0820487	0.105605	-0.303028	-0.176692	-0.00110281	0.0206244	0.080935	-0.175804	-0.1493	0.204344	-0.102326	0.10968	0.121807	0.179263	-0.0273131	-0.0387552	-0.325255	-0.127298	-0.0811649
PID_HDAC_CLASSII_PATHWAY	-0.160974	0.0417636	-0.148327	0.297997	-0.0442647	0.0633324	-0.0124686	-0.0808224	-0.251689	-0.116626	0.071023	0.346843	0.103739	0.379654	-0.245573	0.00247008	0.0222819	-0.113916	0.192297	0.0538999	0.243791	0.25663	0.25479	0.267096	-0.25122	0.222523	0.116751	-0.0465934	0.0640198	-0.0805764	-0.0463981	0.0271889	-0.0165626	0.0108831	0.0206788	-0.0584164	0.0101863	-0.0561769	-0.0465028	-0.466867	-0.0807331	-0.117094	-0.329904	-0.113331	0.113272	-0.173695	-0.199887	0.417746	0.234151
PID_BETA_CATENIN_DEG_PATHWAY	-0.190473	0.0145366	-0.157475	0.135565	-0.339697	0.0965824	0.229002	0.0699917	-0.266404	-0.205034	-0.0910389	0.287138	-0.218573	0.0894399	0.535538	-0.309402	0.21266	-0.175745	0.125914	0.241764	-0.00986943	-0.361675	0.055241	0.0682304	-0.304424	-0.129902	0.547674	-0.238467	-0.225053	-0.169345	-0.0614586	0.218549	-0.00833396	-0.166897	-0.0810088	-0.0636276	-0.138017	-0.264	0.402618	0.204357	0.0610204	0.0461899	-0.191596	-0.338713	-0.202528	-0.0859008	-0.237477	-0.0745065	0.188289
PID_HDAC_CLASSIII_PATHWAY	0.11444	-0.0335634	0.277174	0.136831	0.0818903	0.322512	-0.032141	-0.242144	-0.271679	0.180652	-0.330616	0.0851052	-0.0122062	0.375591	-0.399507	-0.17694	0.381821	-0.383648	0.18398	-0.184905	0.178844	-0.270431	0.152173	0.0114731	0.16831	-0.00538645	0.190137	0.200839	-0.353489	-0.217984	-0.0136576	-0.283918	-0.130744	0.366802	0.0550856	0.219764	-0.0677678	-0.260926	-0.172075	-0.073001	0.231781	-0.0966386	-0.0474887	0.105951	-0.193238	-0.145536	-0.325096	0.408529	0.269843
PID_GLYPICAN_1PATHWAY	0.197319	0.237574	-0.141032	0.191276	0.198482	-0.00849995	-0.0216473	0.480384	0.142364	0.0273391	0.00932976	0.100965	0.249983	-0.0595038	-0.0154605	0.148711	0.0137354	0.223871	-0.341082	-0.285889	-0.172769	0.262231	-0.179498	0.244948	0.0215239	-0.267815	0.157891	0.366942	-0.0587311	-0.306504	-0.225264	0.195563	-0.351974	0.00472688	0.303115	0.0294811	-0.192126	-0.274651	-0.0764449	0.119262	-0.195813	0.290715	0.316029	-0.0540162	-0.119375	0.0410678	-0.186247	0.199102	-0.0922947
PID_TCR_PATHWAY	0.038451	0.0680567	0.188381	0.209632	0.157595	-0.0358762	0.0188988	-0.136716	0.0637408	0.159437	-0.056689	-0.00632585	-0.151906	0.0313197	-0.0319929	-0.172189	0.078036	-0.264742	0.171326	-0.0987667	0.215708	0.0633217	0.130236	0.203596	-0.133579	0.124088	0.0491388	0.0708093	-0.107371	-0.194502	0.0926307	-0.053831	-0.0171946	0.00044959	0.178967	-0.270148	0.0949529	-0.125196	-0.298286	0.0726637	0.0178671	0.0267846	-0.0352258	-0.11678	0.0553672	-0.131908	-0.148369	0.0487772	0.268238
PID_IL27_PATHWAY	-0.194476	0.231072	-0.202729	0.189698	-0.160541	-0.0288441	0.0758113	-0.116749	0.248113	0.27712	-0.243752	-0.0486947	0.198716	0.0854085	-0.0885371	0.0471443	0.284774	-0.380099	-0.0089059	-0.0311799	0.1114	0.0896921	-0.00854711	-0.32752	0.265168	-0.158824	-0.0777952	0.377468	-0.315905	-0.229357	0.159431	-0.231118	-0.283812	-0.20706	0.338146	-0.0947764	0.240752	-0.175279	-0.142972	0.159832	0.037871	0.162071	0.0837077	0.293333	-0.446875	0.0309006	-0.0841265	0.0948384	-0.129719
PID_NFKAPPAB_CANONICAL_PATHWAY	0.143951	-0.491625	-0.147419	0.221855	0.171803	0.0523179	0.254707	-0.0274894	0.582012	-0.0671755	-0.216535	0.151456	0.00730628	-0.181911	-0.161147	-0.159699	0.412565	-0.0105674	-0.291905	-0.00579463	0.195331	0.00887502	-0.326131	-0.0712256	-0.339904	-0.251296	0.240937	0.229124	0.119171	-0.184937	0.080853	0.0291557	-0.021741	-0.020257	0.345829	-0.539713	-0.180667	-0.101033	-0.338803	0.332446	-0.0330435	0.272969	-0.139418	-0.203698	-0.184187	0.00258612	-0.205155	-0.267076	0.220513
PID_E2F_PATHWAY	-0.058712	-0.179655	0.108946	0.173985	0.0790833	0.358625	-0.0778946	-0.00485429	-0.431613	-0.271379	-0.17121	0.427089	0.252097	0.298572	0.225999	0.126548	-0.0678779	0.0244972	0.182355	0.380518	0.254636	-0.0856084	0.00932369	0.178493	-0.295502	0.144076	0.368919	-0.113757	-0.0175135	0.00665061	-0.05594	-0.0611859	0.0321545	0.199708	-0.131749	0.0701884	0.000641295	-0.00817824	-0.151895	-0.365394	-0.0760231	-0.0871942	-0.0809512	-0.479657	0.206156	-0.0175175	-0.33305	0.165352	0.261062
PID_ER_NONGENOMIC_PATHWAY	-0.104969	0.148988	0.172538	0.122786	0.12042	-0.252183	0.108236	-0.0793057	-0.115638	0.097671	0.0752843	0.0309973	0.313946	0.227189	-0.0144867	-0.104467	-0.174328	-0.240053	0.068872	-0.0949826	0.0863683	0.20593	0.303357	0.0169148	-0.134686	-0.0284468	-0.0961663	0.0558818	-0.218175	-0.215796	-0.195467	0.137641	0.304833	0.0599916	0.233488	-0.074086	-0.0613058	-0.077207	-0.122785	-0.178823	-0.0690407	-0.262755	-0.0992814	0.0784768	0.16573	-0.211898	0.0832953	0.106521	0.0802504
PID_DNA_PK_PATHWAY	-0.130442	-0.122723	0.100188	-0.324376	-0.353147	0.419226	0.219161	0.313001	-0.136514	-0.189218	-0.128444	-0.206421	-0.157001	0.0148213	-0.13973	0.013698	-0.218327	-0.326045	-0.0648153	-0.245206	0.023705	0.0186795	0.0438109	0.389489	-0.423352	0.0835564	0.451928	-0.289097	0.441995	-0.0270505	0.028573	-0.294835	-0.244816	0.333828	-0.126698	-0.117852	-0.157615	-0.102598	0.42991	0.242989	-0.119847	0.164064	0.344574	-0.0709107	-0.167447	-0.350967	-0.173585	-0.271061	0.306801
PID_HIF2PATHWAY	0.0713616	0.0426231	0.134262	0.0145579	-0.0203321	0.164864	0.177614	0.290743	-0.163528	-0.0617842	-0.316543	-0.0200161	0.0547835	-0.0059783	-0.189278	0.137917	0.0121787	0.175931	-0.149729	0.00476282	0.306895	0.0736836	-0.218341	-0.0725974	-0.0549241	0.224929	-0.00120603	0.345198	-0.45064	-0.220661	-0.0787693	-0.0345658	-0.385594	-0.187256	0.0805755	0.41344	0.0724937	-0.0563481	0.238475	-0.0130199	0.260744	0.0625677	-0.0788642	0.249551	-0.0556407	0.112674	-0.338576	-0.212746	-0.263879
PID_CD40_PATHWAY	-0.00298888	-0.229505	-0.12218	0.045427	0.190251	0.172769	-0.0451093	-0.0826826	0.29499	0.300287	-0.28889	-0.0312025	0.242722	-0.168879	-0.252507	-0.192015	0.212167	-0.0148306	0.00317792	0.0512958	0.00284742	-0.0210384	-0.166415	0.299091	-0.0143008	-0.109713	-0.109505	0.143724	0.0172637	-0.11843	-0.0552798	-0.204162	0.0304286	0.0150387	-0.108422	-0.410198	-0.302065	-0.0181799	-0.0672719	0.31184	-0.323551	-0.16612	-0.0539024	0.147428	0.0779407	-0.182274	-0.142284	-0.0959937	-0.0864925
PID_ATR_PATHWAY	-0.382211	-0.226474	-0.089088	0.146178	-0.127358	0.41794	-0.0637809	-0.191673	-0.457279	-0.349708	0.0658939	-0.00328518	0.294415	0.2793	0.0336651	-0.128097	0.0952214	0.161527	0.316781	0.244588	0.380038	-0.101843	0.0601461	0.395371	-0.158217	-0.0529988	-0.0196896	-0.233504	0.00691923	-0.0270625	0.0187431	-0.172489	-0.15797	0.178472	-0.0110818	-0.164523	0.505123	0.260229	0.24137	-0.423965	-0.170754	-0.14062	-0.243387	-0.540271	0.023393	-0.108203	-0.207012	0.0177882	0.323956
PID_INTEGRIN_CS_PATHWAY	0.127079	0.169876	0.123836	-0.258524	0.232013	-0.29136	0.0325103	0.0714624	0.366281	0.0212931	-0.159661	-0.28291	-0.100746	0.0131677	-0.129466	-0.0193277	0.324962	-0.507824	-0.297558	-0.125985	0.275785	-0.266432	-0.0640303	-0.195612	0.121464	0.178505	-0.239732	0.445154	-0.288507	-0.026185	0.116525	-0.309357	-0.0492036	0.0854119	0.130468	-0.255816	-0.0284613	0.06689	-0.209703	0.240271	-0.266337	-0.0784653	0.134648	0.170089	-0.202487	0.1277	-0.340506	0.0642816	-0.145145
PID_MET_PATHWAY	-0.0454438	0.0804619	-0.00649173	0.113975	-0.0918646	-0.0229246	0.0632339	-0.013156	-0.161479	-0.00686384	0.0615571	-0.0458691	0.172724	-0.00159735	0.178591	-0.274321	0.0129148	-0.055883	-0.106727	0.0877031	0.0599734	-0.174741	0.0277602	-0.0502742	0.0370513	0.196796	0.0718198	0.0172669	-0.205921	-0.247238	0.111248	0.253932	-0.0399121	0.0644732	0.0996783	-0.00884193	0.0077805	-0.0216372	-0.196909	-0.185997	-0.0611088	-0.156136	-0.232007	0.0125873	0.122607	-0.0308074	-0.0730663	-0.163161	0.138473
PID_PTP1B_PATHWAY	0.138922	0.387417	0.0887871	0.240634	-0.000721642	0.049249	-0.125956	0.0927639	0.0968606	0.133179	-0.101155	-0.149441	0.247598	0.0675838	-0.129124	-0.0185493	0.105639	-0.133176	-0.00549433	0.0943054	0.09796	0.0583268	0.299648	-0.168475	0.214523	-0.0425842	0.286974	0.235347	-0.189912	-0.0946976	-0.0452724	-0.132651	-0.0173154	-0.253522	0.172422	0.101859	-0.256778	-0.265585	-0.323471	-0.0457121	0.216875	-0.113044	-0.00487984	0.127413	-0.140302	0.0796082	-0.181667	-0.209711	-0.226146
PID_INTEGRIN3_PATHWAY	0.341766	0.19159	-0.0292593	-0.0665053	0.193527	0.00472981	-0.1874	0.378575	0.474794	0.0541202	-0.117156	-0.0834312	-0.0140447	-0.252659	-0.372346	-0.139967	0.434478	-0.36445	-0.0746621	0.0402857	0.166352	0.325773	-0.198156	0.030674	0.179741	0.0249603	0.259531	0.545242	-0.309351	-0.222158	-0.114844	-0.0715094	-0.0739453	-0.0839322	0.381222	-0.110603	-0.192748	0.0483785	-0.311896	0.275172	-0.15538	-0.113192	-0.0943852	0.344461	-0.235029	-0.0329727	0.0646138	0.0732564	0.0989893
PID_IL12_2PATHWAY	0.22919	0.119304	-0.233349	-0.145675	0.0244817	0.0467227	-0.0107252	0.177674	0.277086	0.231292	-0.132283	-0.108049	0.0276424	-0.00532915	-0.0885272	0.0303493	0.169528	-0.254704	0.140387	0.00632475	0.0523858	-0.126066	0.101123	-0.284585	0.198809	-0.12411	0.0126659	0.366113	-0.0925943	-0.107623	0.136404	-0.204132	-0.218739	-0.461497	0.274985	-0.303555	0.0280355	-0.237627	-0.267031	0.103271	0.0430343	0.0368789	-0.0151143	0.125212	-0.21341	-0.0848102	0.0656536	0.0597615	-0.260645
PID_S1P_S1P3_PATHWAY	0.0783763	0.231033	0.0655289	0.335686	0.343856	-0.0582372	0.108637	-0.0827212	-0.403324	0.134961	0.163428	0.220512	0.443259	0.100783	-0.278995	-0.120084	-0.241403	0.278098	0.0440608	-0.388366	0.0746749	0.205257	0.0341357	-0.111855	-0.246072	0.153197	0.0585426	0.347982	-0.139606	0.049531	-0.454354	0.25271	0.0973233	0.199034	0.11395	-0.155846	-0.27596	-0.0305274	-0.417017	-0.00583874	-0.0762668	0.0161144	-0.256866	-0.102582	0.104021	-0.153046	-0.0218184	-0.00902516	-0.116958
PID_LPA4_PATHWAY	-0.0980892	-0.455459	-0.296363	0.130144	0.206631	-0.244151	-0.184711	0.402409	-0.231562	0.471214	-0.00934455	0.317211	-0.0066233	-0.000878224	0.154209	0.132352	-0.00590024	-0.0391626	-0.374196	-0.0603725	-0.296095	-0.348709	-0.217582	0.363696	-0.105568	0.364417	0.13825	-0.0542584	0.400415	0.0708742	-0.00105411	0.459726	-0.201677	0.384419	-0.0969847	0.328534	0.0497614	-0.0743002	0.299751	-0.371886	-0.32955	-0.0514679	0.113619	-0.00238714	-0.113526	-0.0613875	0.29834	0.546823	-0.0922998
PID_AR_PATHWAY	0.0833511	0.12704	0.0406398	0.173305	-0.115061	0.160834	0.170656	0.0648357	-0.289254	-0.145963	0.114399	0.208853	0.0179031	-0.105514	0.0235009	-0.1201	0.30106	-0.102485	-0.129757	0.125043	0.16051	-0.0888726	-0.224492	0.118077	-0.111135	0.219691	0.382644	0.00285931	-0.0658801	-0.0782006	0.0775762	0.150408	-0.33045	-0.181705	0.109858	-0.014549	-0.0550971	-0.0262889	0.0237928	-0.0971192	0.255733	0.138925	-0.18005	-0.254426	-0.0738601	0.240228	-0.438706	-0.372675	-0.0663864
PID_NFAT_TFPATHWAY	0.217343	-0.0225815	-0.00476662	0.237258	0.207541	-0.0273769	-0.203422	0.0181587	0.188969	-0.10199	0.13457	0.00150161	-0.0472106	0.0347491	-0.00352388	0.00944144	0.137862	-0.34422	-0.0450358	0.00909797	0.325547	0.131775	-0.162806	0.0367251	-0.179484	0.118054	0.257442	0.149624	0.0237767	-0.397417	-0.105914	-0.144132	-0.22609	0.100312	0.263384	-0.11202	-0.262473	-0.195885	-0.145143	0.00470035	-0.0478608	0.136024	0.124076	0.137028	-0.0477685	0.0434803	-0.211742	-0.228419	-0.101028
PID_EPHB_FWD_PATHWAY	-0.0497821	0.086507	-0.107001	0.0890537	-0.00599353	-0.321527	0.172883	-0.282444	-0.07554	0.211768	0.134034	0.0246582	0.135521	0.0732204	0.230833	-0.195685	-0.211157	0.106179	-0.0462227	0.081178	0.144319	0.125698	0.340539	-0.0657536	-0.165367	-0.13708	0.341985	0.071649	0.0264988	-0.22505	-0.0943405	0.108317	0.157904	0.185416	0.221349	-0.204995	-0.169671	0.0726069	-0.0388385	-0.232377	-0.0379112	-0.204758	-0.0497819	0.038389	-0.149017	-0.176281	-0.206416	0.20548	0.147023
PID_AVB3_OPN_PATHWAY	0.39652	-0.318217	-0.166805	0.314792	0.414741	-0.313231	0.111113	-0.050667	0.29779	0.222543	0.172104	-0.0711305	0.246932	-0.0621961	-0.283618	0.00831096	0.200177	0.118752	-0.153389	-0.181935	0.186907	-0.190097	-0.0259982	-0.0892595	-0.043112	0.140965	0.0356863	0.333379	-0.229923	-0.265234	-0.225259	-0.0129976	-0.23435	0.128383	0.315154	-0.359174	-0.370437	0.0757537	-0.367342	0.147495	-0.297988	-0.364515	-0.210004	0.0919484	0.113247	-0.0119848	0.183732	0.261792	0.0854363
PID_S1P_S1P4_PATHWAY	-0.056639	0.00239851	0.0320247	0.0606234	0.150141	-0.234011	0.548837	-0.512329	-0.495349	0.159343	0.231601	0.0781838	0.440208	0.224939	-0.193896	0.0360863	-0.0207238	0.331043	0.221371	-0.204745	0.420192	0.00385783	-0.0750655	-0.251342	-0.485433	-0.0332783	-0.116745	0.378989	-0.177583	-0.313582	-0.042907	-0.0831658	0.386457	0.365878	-0.138772	0.0101666	-0.0506774	0.190339	0.00654367	-0.164921	0.218424	-0.0737437	-0.188249	-0.259487	-0.152932	-0.427782	0.160324	-0.0525981	-0.0920764
PID_FRA_PATHWAY	0.210137	0.0302748	-0.228499	0.222027	-0.00508646	0.143832	-0.0865949	0.248502	0.102229	0.0990019	-0.0714328	0.00230403	0.0133459	0.381455	0.28144	0.00552208	0.178297	-0.0767323	0.176217	0.28664	0.283925	0.263776	0.0816103	0.1123	-0.170054	0.0149657	0.334105	-0.0500025	-0.185019	-0.223821	-0.296542	0.0677533	-0.113547	-0.26173	0.337888	-0.0261243	-0.325489	0.0654355	-0.248062	0.0142179	-0.17262	0.0467652	0.0639848	-0.0269313	-0.1462	0.198282	0.1145	-0.10604	-0.00485015
PID_MYC_ACTIV_PATHWAY	-0.128692	0.311233	0.121322	-0.363448	-0.293641	0.320194	-0.0656162	0.223823	-0.147449	-0.28808	-0.150104	0.308405	-0.226783	0.254104	0.376195	0.245279	-0.178967	-0.157942	0.0804145	0.416541	0.153	-0.0475919	0.153472	0.0195907	-0.261234	-0.135287	-0.0796426	-0.313674	0.00475925	-0.0540431	0.180507	-0.16434	0.0492762	-0.313649	0.155947	0.370097	-0.0518345	0.125614	0.300184	-0.333702	0.259924	0.0891773	-0.137758	-0.197186	0.17029	-0.131348	-0.242119	0.10731	0.0437682
PID_ARF6_TRAFFICKING_PATHWAY	-0.0428049	0.226461	-0.0995672	0.00231712	0.0136565	-0.167531	0.167532	-0.152824	0.115823	0.0662144	-0.117739	-0.0474545	0.00254865	-0.192449	-0.208115	-0.051112	0.127884	-0.293635	-0.320738	-0.127985	0.201862	-0.140824	0.22898	-0.124025	-0.0798363	0.207557	-0.0103938	0.550866	-0.381132	0.104601	0.0109921	0.0660088	-0.0348418	0.200406	0.168151	0.0150641	-0.107529	0.078205	-0.172812	0.210531	-0.111254	-0.375592	-0.0367166	0.252907	-0.273162	-0.179385	-0.195497	0.069378	0.143096
PID_RHOA_REG_PATHWAY	0.121572	0.262721	0.323287	0.0271135	-0.00753828	-0.124722	-0.231196	-0.0521651	-0.0702099	0.212962	0.0023425	0.249922	0.114401	0.0740083	0.0595503	-0.04574	0.193736	0.107627	0.140201	0.110624	0.0122466	0.107314	-0.0727786	-0.019891	-0.184633	0.101482	0.102732	0.15244	-0.283005	0.0568771	0.104227	0.0822898	-0.197459	-0.135413	-0.317038	-0.11306	0.356805	-0.0205042	-0.366194	-0.264223	0.0667042	-0.17689	-0.209679	-0.0204136	-0.153764	0.0570328	-0.100175	0.10513	-0.10144
PID_REELIN_PATHWAY	-0.419199	0.305691	0.206006	0.118496	0.164408	0.312426	-0.0203516	-0.15894	-0.156577	0.380461	0.243215	0.238863	0.277961	0.417028	0.129203	0.0806063	-0.113699	0.073807	0.0524317	-0.0533636	0.125426	-0.281352	0.258945	0.162463	-0.285495	0.0709247	0.029851	-0.0623067	-0.136339	-0.205531	-0.154051	0.248837	0.0042265	0.0601142	0.255323	-0.121176	-0.0895221	-0.0941199	-0.0178597	-0.402671	-0.0189955	-0.387236	-0.511429	-0.183157	-0.325753	0.190654	0.142013	0.363685	-0.219753
PID_PS1_PATHWAY	-0.0693566	-0.193386	0.0102773	-0.205796	-0.17488	0.106835	0.449411	-0.138967	0.0587961	-0.0117964	0.0581263	0.239241	-0.271462	-0.16056	0.266221	-0.0407148	0.0755355	-0.0198752	0.0904733	-0.154137	-0.0947787	-0.141625	-0.0579584	-0.104843	-0.032822	-0.106527	-0.0704442	0.0654303	-0.26792	-0.0393835	-0.0252795	0.0912073	0.0402721	-0.0797591	-0.0662643	0.167942	-0.0171269	-0.097721	0.114382	0.255987	0.0843146	0.132757	0.176536	0.0107116	-0.0646369	0.0955925	-0.217168	-0.145759	-0.0544528
PID_ILK_PATHWAY	0.132293	0.278774	0.125513	0.129993	0.0123395	-0.114267	-0.0309078	-0.142098	-0.0425006	0.0460408	-0.253886	0.266304	-0.289109	0.0799038	-0.149886	0.00723887	-0.152356	-0.121791	0.0399831	-0.130326	0.324692	0.105723	0.0801457	-0.00678379	-0.0621474	-0.0637578	0.249607	0.170111	-0.151773	0.0366725	0.111609	0.208224	-0.0634057	-0.0777366	0.0923351	0.117426	0.0802756	-0.253707	-0.0786071	-0.0348238	0.0507733	-0.00270212	-0.0410781	-0.243243	-0.0277205	-0.227299	-0.27013	0.159059	0.0577458
PID_NECTIN_PATHWAY	0.223254	0.0918278	-0.0140436	0.118653	-0.0231813	-0.0952016	0.232436	-0.292434	0.18367	-0.151757	-0.0758217	-0.277702	-0.035231	-0.0864349	-0.323089	-0.408848	0.192782	-0.288389	-0.309132	-0.0800734	0.155947	0.0354667	0.284836	0.0180229	0.160644	0.0287966	0.372148	0.308632	-0.33114	0.136645	0.173438	0.141809	-0.262237	0.124725	0.300762	-0.165596	-0.155416	-0.195977	-0.33722	0.0287007	0.214538	-0.073398	-0.0259364	0.0721582	-0.0282865	0.134251	-0.34209	-0.25254	0.151882
PID_P38_ALPHA_BETA_PATHWAY	-0.0645568	0.362625	0.193735	-0.0488672	0.158813	-0.0536827	-0.0390035	0.041192	0.0817129	0.0667064	0.17687	-0.156849	-0.0350081	-0.0273867	-0.0397367	0.0850766	-0.117986	-0.201118	-0.220794	0.0915466	-0.178806	-0.123322	0.374841	-0.0660157	-0.159307	-0.144151	0.055245	0.0421786	-0.0584453	0.195551	0.0598091	-0.0733146	0.000707025	-0.157102	0.317475	-0.328155	-0.228378	0.0510541	-0.267295	0.242513	-0.0233294	-0.0624572	0.00687948	-0.0010646	-0.325298	-0.0979366	-0.121305	0.172931	0.039268
PID_WNT_SIGNALING_PATHWAY	-0.006951	-0.0861759	-0.241269	0.130957	0.201298	0.107519	0.484574	0.225356	0.154766	0.168864	-0.383196	-0.0365988	-0.0716842	-0.206594	-0.102675	-0.14197	0.289029	-0.069099	-0.158208	-0.110973	-0.0194175	0.278593	0.0701599	-0.142443	-0.104494	0.0498678	0.0212996	0.333016	-0.392767	-0.45539	-0.175522	0.397803	-0.155416	0.315895	-0.00286943	0.00450448	-0.217009	-0.115686	0.0946895	0.132977	0.15361	0.0317817	-0.00512779	0.0682691	-0.0784546	0.0541854	-0.12467	0.0443782	-0.388234
PID_TRAIL_PATHWAY	0.187765	-0.293862	-0.322724	-0.196662	-0.00166667	-0.0944976	0.175189	-0.0186758	0.19168	0.127344	-0.0293344	-0.369228	0.0785366	-0.386206	-0.229884	-0.0745818	0.360072	-0.217109	-0.0388294	-0.0512156	0.0380381	-0.343651	-0.151422	0.149114	0.313618	-0.0776133	0.174655	0.416405	-0.379126	-0.215548	0.258626	-0.434573	0.0348098	-0.176117	-0.201393	-0.425114	-0.0327403	0.181104	-0.235937	0.156733	-0.424594	0.12875	0.327065	0.0492872	0.153532	0.0243121	-0.223077	-0.125269	0.0549921
PID_CDC42_PATHWAY	-0.102205	0.0840821	-0.0507928	0.158877	0.134833	-0.20075	0.0026791	-0.168371	-0.172156	0.333266	0.201212	0.0709192	-0.124858	-0.0112335	0.016029	-0.244645	-0.00342721	-0.0178506	-0.0291536	-0.0512791	0.147853	-0.0562652	0.206455	-0.1608	-0.0439054	0.136737	0.217662	0.130428	-0.0706985	-0.0866815	0.0596721	0.212714	-0.0108342	0.107183	0.00390621	-0.252847	-0.0692618	-0.104239	-0.293345	0.0991224	-0.220994	-0.355199	-0.0775068	-0.172242	-0.0454463	-0.0685887	-0.0600466	0.144685	-0.0136263
PID_RET_PATHWAY	0.0467945	0.121543	0.0384027	0.17513	0.0902315	-0.196258	0.0261105	-0.21743	-0.156522	0.117386	0.0970714	0.0949446	0.169619	0.0155544	0.149304	-0.212971	5.58e-05	-0.219567	-0.0920119	-0.123533	-0.0334539	-0.0100531	-0.0819935	-0.0634056	0.0168274	0.224798	0.16898	0.0898634	0.151852	-0.069256	-0.0109916	0.0725272	-0.0262243	0.125519	0.195795	-0.226476	-0.269275	0.000399693	-0.276039	-0.0871857	-0.0211429	0.0355101	-0.27312	0.105587	-0.029265	0.0350113	-0.170411	0.196595	0.14017
PID_CDC42_REG_PATHWAY	0.00516543	0.274395	0.253403	-0.0195145	-0.258777	0.0805125	0.0147438	0.0445353	-0.177735	0.132531	-0.141093	0.11161	-0.0043155	0.274678	-0.254399	0.298639	-0.0563235	0.337834	-0.194624	0.0542556	0.00376485	-0.14794	0.337017	0.041878	-0.265419	0.0744435	0.142447	0.0503585	0.0660888	-0.0341739	-0.0372103	-0.0400339	0.27337	-0.00683077	-0.0152222	-0.0955566	-0.0237278	0.0151787	-0.139949	-0.0754999	0.11312	-0.136193	-0.058576	-0.158761	-0.173095	-0.334221	0.197474	0.398995	-0.267777
PID_ATM_PATHWAY	-0.151681	-0.237741	0.218155	0.245182	-0.106826	0.189593	-0.0780199	-0.175198	-0.334411	-0.491362	-0.0748453	0.232142	0.316882	-0.0247575	0.191928	-0.169288	0.0842727	-0.146981	-0.0686425	-0.00880073	0.0114079	0.0768815	0.266832	0.288366	-0.325258	0.160837	0.250961	-0.371571	0.17761	0.105802	0.0320439	-0.0301001	0.00751051	0.0581945	-0.0468343	0.0523718	0.289938	0.293334	0.0705643	-0.338476	0.121462	0.0773976	-0.129929	-0.294492	0.173099	-0.228333	-0.0485468	-0.331154	0.339204
PID_ARF6_PATHWAY	0.309545	0.0359144	-0.136579	0.141012	0.149909	-0.069124	0.0713299	0.115208	-0.015116	0.2212	-0.272885	-0.232367	0.305469	0.103185	-0.144967	-0.323565	0.301327	-0.142463	-0.222076	-0.115739	0.0635128	0.100837	0.0660716	-0.0310221	0.188654	-0.0531806	0.0578815	0.217828	-0.308365	-0.0518512	-0.0708571	-0.258961	-0.0649328	-0.0792077	-0.058368	-0.140699	-0.187173	0.0949337	-0.266921	0.161388	-0.175553	-0.0684694	-0.0237475	0.0175157	-0.0429101	0.0235968	0.158879	0.0565253	0.0138213
PID_LKB1_PATHWAY	-0.0572709	0.176291	0.113629	0.267231	-0.231208	-0.0291374	0.0364758	-0.224113	-0.219942	0.0180054	-0.189018	0.159537	0.101479	0.409634	0.188492	-0.253671	-0.129074	-0.274352	0.296173	-0.166007	0.244011	0.00564297	0.301446	-0.159616	-0.0254116	0.178454	-0.095202	-0.141515	0.00827803	-0.0747688	-0.199922	-0.0709948	-0.0249935	0.138583	0.167659	-0.0305819	-0.120508	0.0282962	-0.183558	0.0117766	0.0694751	-0.0474433	0.00254556	0.0153438	-0.024912	0.0462817	-0.0569493	-0.0704061	-0.0226604
PID_CD8_TCR_PATHWAY	0.0582903	0.0891454	0.251272	0.171827	0.261813	-0.00550822	-0.0147827	-0.0471986	0.106324	0.349718	-0.0333163	-0.086046	0.0277658	0.0261636	-0.0623981	-0.14622	0.0821802	-0.319635	0.233025	-0.248156	0.123408	0.138262	0.100422	0.054387	0.00650239	0.0880745	0.117303	0.175947	-0.142098	-0.221679	-0.0179658	-0.0909202	0.0213815	-0.162158	0.179247	-0.257796	-0.00268372	-0.253988	-0.291983	0.111831	0.0484458	-0.132385	-0.0151371	-0.172706	0.0882027	-0.359056	0.12517	0.00598571	0.163567
PID_WNT_CANONICAL_PATHWAY	0.161164	0.0676469	0.10173	0.225362	-0.0798104	-0.147348	0.543045	-0.0401527	-0.152949	-0.065512	0.0831499	0.00532776	-0.381441	2.64e-05	0.262773	-0.412848	0.388644	-0.209889	0.16944	0.100526	0.090313	0.0283897	0.285022	-0.0578968	-0.0193037	-0.0776752	0.570124	0.0657699	-0.300043	-0.0713846	-0.067526	0.0977463	-0.0393316	0.00474882	-0.102291	-0.225821	-0.0275441	-0.221815	0.236829	0.134583	-0.0740598	0.0741049	-0.225257	-0.198034	-0.0703375	-0.137283	-0.299507	-0.266435	-0.0252876
PID_TCPTP_PATHWAY	-0.0414747	0.352117	-0.0253275	-0.267367	0.0505209	-0.138654	0.280618	0.264875	0.149304	0.205218	0.0318696	-0.207409	-0.213969	-0.150708	-0.0540351	-0.00981219	-0.0582949	-0.227134	-0.324063	0.0903628	0.133067	0.213871	0.224921	-0.146458	0.030446	0.123671	0.126702	0.281889	-0.190607	-0.214123	0.188583	-0.0276236	-0.0534686	-0.254737	0.108959	0.0333454	-0.239766	-0.244966	-0.243616	-0.0282075	0.00723858	-0.147459	0.138096	0.0537406	-0.0491504	0.175388	-0.298957	-0.198263	-0.100211
PID_ANGIOPOIETIN_RECEPTOR_PATHWAY	0.0530209	-0.00574911	-0.0312914	-0.0202387	0.0978456	-0.165006	0.0886837	0.00214239	0.191718	0.0923741	-0.0683274	-0.0398129	-0.0123488	-0.157449	-0.0910025	-0.229276	0.0559133	0.030551	-0.184878	-0.0223911	0.0893147	-0.0116708	0.140726	-0.100555	0.250885	0.202263	0.129074	0.358434	-0.172996	0.0986289	0.104268	-0.0224318	-0.172656	-0.0668959	0.289204	-0.24109	-0.126991	0.180566	-0.280658	0.238209	0.00173091	-0.0573992	-0.0637577	0.0682519	-0.16507	-0.0578673	-0.163605	-0.0221399	-0.246731
PID_FAS_PATHWAY	-0.066104	-0.119053	-0.233266	0.0849892	0.292455	-0.159996	0.0751423	-0.119366	0.0699054	0.0885484	0.115571	-0.269908	0.130934	-0.153979	-0.0760733	-0.0705232	0.0972698	-0.10244	-0.0491301	-0.108307	-0.122377	-0.0991842	0.164502	0.273889	-0.0092673	0.245682	0.0129371	0.200615	0.0202382	-0.163387	0.206285	-0.115726	0.130661	-0.289798	0.00221812	-0.450727	-0.130071	0.108798	-0.481398	0.134986	-0.244993	-0.0634832	-0.167	-0.182928	0.155483	0.0609543	0.0332854	-0.0346798	0.00464766
PID_CIRCADIAN_PATHWAY	-0.0599465	0.0690655	0.380054	0.382392	0.535102	0.249978	-0.226112	-0.121195	-0.370507	0.480481	0.165216	-0.264956	0.451685	-0.133867	-0.120815	0.0795635	-0.205225	0.28671	0.0709006	0.00373872	-0.193572	0.367122	0.201704	-0.225474	-0.470555	0.136037	-0.064766	-0.0408119	-0.127805	-0.305808	-0.0734303	0.0569816	-0.432585	-0.351316	0.0729037	0.305097	-0.0636094	-0.106238	-0.0667551	-0.126417	0.208739	-0.0882453	-0.180376	0.0475836	0.0933231	0.0980597	0.146655	-0.462931	-0.151126
PID_TXA2PATHWAY	0.153395	0.0907757	0.236372	0.327753	0.387013	-0.00735186	0.00971465	-0.169564	-0.147034	0.253613	-0.0378523	-0.0599476	0.270425	0.0285025	-0.101923	-0.0206512	0.333153	-0.0794862	0.103166	-0.112983	0.149884	0.0569789	0.173962	0.256553	0.152052	-0.0468503	-0.116258	0.286579	-0.2955	-0.175889	-0.248961	0.226092	-0.187466	-0.0289055	-0.126676	0.00674517	-0.0611545	-0.108192	-0.160187	-0.189952	-0.118977	-0.129323	-0.0843156	0.149501	-0.003042	-0.202593	-0.0519144	-0.135811	-0.0308557
PID_SHP2_PATHWAY	-0.0752133	0.0277997	-0.0632974	0.0872473	0.0285411	-0.114439	0.0243697	0.0759618	0.0328901	0.0940426	0.0652215	-0.0819718	0.048723	-0.237818	-0.206985	-0.230906	-0.0362344	-0.249427	-0.128689	-0.105335	0.188132	0.133744	-0.0637446	-0.187256	-0.175457	-0.00468659	0.139907	0.389516	-0.150081	-0.116245	0.255123	-0.0676353	-0.0111058	0.130998	0.359714	-0.276692	-0.18673	-0.0250841	0.0199007	0.178618	0.177858	0.0291351	-0.118385	0.204141	-0.0616304	-0.15252	-0.0344737	-0.00228871	0.104991
PID_HDAC_CLASSI_PATHWAY	0.0315534	-0.122609	0.117262	0.269216	-0.139175	0.256213	-0.0118718	-0.296702	-0.243384	-0.278886	-0.134957	0.256056	-0.0706871	0.205517	0.144174	-0.162922	0.236934	-0.0250319	0.268252	0.300923	0.207845	-0.222486	-0.141235	-0.128277	-0.21862	0.28167	0.284157	-0.020647	0.0184757	0.0231091	0.0699044	0.0906046	-0.0212184	-0.00448467	0.131754	0.0619862	0.131723	-0.0684989	-0.0998639	-0.217157	0.00406747	0.246005	-0.344686	-0.232477	0.10323	0.0864404	-0.357043	0.149898	0.0161971
PID_S1P_S1P1_PATHWAY	0.107328	0.421703	0.176621	-0.00689431	0.187627	-0.0232445	0.361004	-0.201492	-0.224479	0.269038	0.235832	-0.109434	0.219151	0.0385501	-0.173991	-0.14594	-0.17781	0.105211	0.199203	-0.158017	0.404839	-0.115231	0.0362663	-0.274335	-0.356303	0.0384167	-0.098378	0.350996	-0.334409	-0.208569	0.0817262	0.0122055	0.105544	-0.0308185	0.177651	-0.00451427	-0.18985	-0.216727	-0.0707041	0.0667457	0.200782	0.22304	0.0574295	-0.0838744	-0.123947	-0.0709012	-0.323555	-0.361711	-0.342661
PID_TELOMERASE_PATHWAY	-0.0603075	-0.0295113	0.0646459	0.269424	-0.110319	0.0375183	0.079311	-0.125073	-0.296502	-0.2978	-0.141083	0.347727	-0.00254284	0.167559	0.0888796	0.183672	0.0745537	0.079275	-0.0639817	0.283537	0.274212	-0.0342208	0.0833012	-0.152885	-0.221864	0.16468	0.118603	-0.00420748	0.228308	0.0515968	-0.0282807	0.0563637	-0.188503	-0.032865	0.0206513	0.132119	-0.0243675	-0.0253046	0.0591761	-0.182912	-0.0619438	-0.0550381	-0.3581	-0.0746751	0.234395	-0.144664	-0.0810629	-0.0183173	0.0744827
PID_HNF3B_PATHWAY	0.359199	0.0982319	-0.0657421	0.0665491	0.2906	-0.233055	-0.232535	-0.21772	0.136959	0.262584	-0.211602	0.0105496	0.0712164	-0.112924	-0.0505666	-0.279599	-0.0461751	0.0293065	-0.0930573	-0.0635274	-0.0263228	0.430845	-0.00868101	0.277774	0.35407	0.153504	-0.0998006	-0.172334	0.280474	-0.00696515	-0.0123449	0.0992489	-0.420377	0.139845	-0.0361368	-0.06421	0.235883	0.128518	0.0440642	-0.276886	-0.1287	-0.0523454	-0.314699	-0.0387894	0.134585	0.0465565	-0.106173	-0.166762	-0.0279719
PID_NETRIN_PATHWAY	-0.100702	0.316952	-0.330369	0.172055	0.0516091	-0.0120449	0.0724299	-0.0692244	-0.262608	0.0698051	0.282282	0.0395378	0.353305	0.280177	0.0749455	-0.0456553	-0.284003	0.117939	0.0817483	-0.145451	-0.171947	0.222054	0.134562	0.0316646	-0.0189004	-0.0532091	-0.0192567	0.148262	-0.266841	-0.110678	-0.215783	0.277313	-0.0209428	-0.0562003	0.281098	-0.102642	-0.360686	0.193561	-0.00694982	-0.0545909	0.0346795	-0.227131	-0.291329	-0.0919022	-0.218611	-0.114029	-0.23252	-0.142771	-0.204816
PID_IL1_PATHWAY	0.321292	-0.245267	-0.0304909	0.0201906	0.127402	0.107377	0.259114	-0.299627	0.431281	-0.121513	0.00305513	-0.122496	0.0451342	-0.183533	-0.0681582	-0.143518	0.199635	-0.0427565	-0.0590404	-0.0460305	0.046785	-0.169371	0.0898504	0.0565963	0.0797577	0.0465601	0.0799386	0.323578	-0.207543	-0.140543	0.000746632	-0.0836052	0.151347	-0.1238	0.345725	-0.414528	-0.243777	-0.127611	-0.387849	0.0625106	-0.357652	0.0707158	-0.16498	0.029183	0.122003	0.103216	0.0492462	-0.252558	0.312474
PID_NFAT_3PATHWAY	-0.21196	-0.0434103	0.164349	0.318818	0.137317	0.25554	-0.12062	-0.410307	-0.336065	0.252911	-0.0459046	-0.0277422	0.132751	0.130097	0.341897	-0.271999	0.138463	0.135934	0.167021	-0.0955903	0.27062	0.0467638	0.276627	0.218107	0.124309	0.0720658	0.0629327	-0.0261778	0.0532664	-0.0522351	-0.0760033	0.18438	-0.158826	0.11523	-0.154591	-0.192524	-0.0206131	0.25854	-0.307703	-0.337326	-0.180408	-0.2579	-0.231478	-0.25815	-0.0315552	-0.10152	-0.058444	0.00547574	0.371793
PID_REG_GR_PATHWAY	0.0899463	0.105018	0.0730275	0.200583	0.202968	-0.00701506	-0.174751	-0.279806	-0.136597	0.1174	-0.0963102	0.172427	0.0692087	0.218582	0.0211625	-0.148099	0.143047	-0.0381834	0.110191	0.0789395	0.225542	-0.0275647	0.115787	0.0993642	-0.0697447	0.246057	-0.0199833	-0.0247364	-0.131978	-0.0561448	-0.12467	0.0530307	-0.079997	-0.0278004	0.173177	-0.22099	-0.175398	-0.0571878	-0.05284	-0.136906	-0.0793992	0.0378923	-0.0288964	0.054906	0.04739	-0.0688536	-0.125545	0.0252958	0.155137
PID_CONE_PATHWAY	-0.206832	-0.105928	-0.251826	-0.0514494	0.303831	-0.19041	-0.408272	-0.0715044	-0.01997	0.114017	0.135675	0.132568	-0.159229	-0.0861154	-0.0475276	-0.177096	0.0922849	-0.151462	-0.194328	0.0696387	0.101504	-0.0156967	-0.288187	0.304585	-0.0764566	0.227634	-0.172835	0.331798	-0.029176	-0.316001	-0.100007	0.207737	0.0494617	-0.179966	-0.200498	0.0886904	0.169982	-0.196242	0.724874	-0.0588563	-0.429605	-0.0756885	0.099428	-0.213887	-0.145155	0.0830246	0.270742	0.179212	0.478192
PID_INTEGRIN_A9B1_PATHWAY	0.46474	-0.187204	-0.330876	-0.0332449	0.137851	-0.209951	0.101939	0.101223	0.153527	0.0171	-0.04868	-0.0952553	0.0526273	-0.0920982	0.0543311	-0.0225026	0.235644	0.0141335	-0.252187	-0.291714	-0.0573133	0.0173205	-0.142816	-0.298688	0.388274	0.215534	0.120732	0.610639	-0.342912	-0.158135	-0.0184853	-0.0360797	-0.304275	-0.0542404	0.0848328	-0.181316	-0.0896435	-0.0758809	-0.0589523	0.256523	0.0706053	-0.0428674	0.141901	0.281636	-0.17701	0.0561694	-0.0857305	-0.0179943	-0.347406
PID_ERB_GENOMIC_PATHWAY	0.0345009	0.0431916	0.103342	0.16387	0.0766066	-0.0409264	-0.0457389	-0.13646	-0.226504	-0.368211	0.131586	0.120088	0.00688476	0.22024	0.259124	-0.389802	0.0755062	0.394972	0.0166039	0.41507	0.53316	0.153457	0.0806375	0.172486	-0.133223	0.222947	0.0144753	-0.153163	0.0660779	0.202262	0.284207	0.0961362	-0.266666	0.101916	-0.130579	0.164744	-0.264475	-0.0155341	-0.256205	-0.182284	-0.00775009	0.139236	-0.0820458	-0.432467	-0.131593	0.232735	-0.469513	-0.379237	0.525352
PID_ARF6_DOWNSTREAM_PATHWAY	0.354733	-0.0881263	-0.200315	0.00854378	0.0264736	0.0434703	-0.112723	-0.212876	-0.400146	0.353743	0.238216	-0.184062	-0.234123	-0.273248	0.227235	-0.294212	0.349793	0.113672	0.367324	-0.124244	0.307979	-0.340143	0.353672	0.0887438	-0.0175851	0.0993916	0.0494279	0.409219	-0.273614	0.2583	-0.121524	0.280655	-0.397956	0.0934906	-0.0940454	-0.212218	-0.136143	0.336368	-0.289193	-0.0745144	-0.416444	-0.311828	0.0200886	0.0832074	-0.343061	-0.0278877	-0.224283	0.0397992	0.0354581
PID_MTOR_4PATHWAY	0.115631	0.115607	-0.156883	0.268899	-0.0633956	0.113263	-0.0194148	-0.109693	-0.172395	-0.0485731	0.114943	-0.0368202	-0.00489205	-0.0643806	0.135182	-0.167261	0.0174401	0.0363283	-0.109147	-0.175839	0.30361	-0.0449145	0.031913	-0.0868143	0.00788387	0.055452	0.0641175	0.10644	-0.24819	-0.0610901	-0.1053	0.182336	-0.201136	0.0614197	0.0947644	0.0611431	-0.212582	0.241159	-0.27291	-0.000543288	-0.0835376	-0.138145	-0.0830903	0.0229658	0.0565458	-0.0588967	-0.10826	-0.168308	0.00669352
PID_IL2_1PATHWAY	-0.0385818	0.0913864	0.0577319	0.117497	0.307811	-0.187568	-0.0238683	-0.194253	-0.110016	0.258133	0.0212772	-0.0450843	-0.211058	-0.137526	-0.00553974	0.0472317	0.0151862	-0.232236	-0.0936384	-0.0116561	-0.0736399	0.0419658	0.112306	0.00931164	0.212636	0.224333	-0.0302887	0.118588	-0.250575	-0.0620718	0.0901326	0.00858081	0.0283584	0.0771716	0.0868414	-0.30438	-0.0821637	0.0945522	-0.212346	-0.0440964	0.00207502	-0.0567515	-0.167295	0.151475	-0.0219438	-0.134486	-0.166408	-0.0978653	-0.0101236
PID_CXCR4_PATHWAY	0.175879	0.100719	0.0502878	0.168198	0.128514	-0.222335	0.197525	-0.113068	-0.0256287	0.0756963	-0.091125	-0.0887522	0.164799	0.133528	-0.028456	0.0484923	-0.00317611	-0.260384	0.011839	-0.0748649	0.0806847	-0.0724843	0.142563	-0.00598833	0.00262579	0.0683805	0.0373027	0.213822	-0.109162	-0.156703	0.0722035	-0.0923614	-0.0226187	0.0376047	0.207652	-0.0171602	-0.140982	-0.0681005	-0.291051	-0.043317	-0.0284483	-0.0433961	-0.108344	0.0216532	-0.00178927	-0.255261	-0.0332631	0.0112236	0.0806744
PID_IGF1_PATHWAY	-0.0941153	0.0637668	0.0226679	0.0530645	-0.246353	0.000881228	-0.0245769	-0.235738	-0.194184	0.0479604	-0.162077	-0.0336915	-0.0140784	0.189167	0.178967	-0.230733	-0.11252	-0.124947	-0.0624582	-0.00630612	0.126643	-0.254957	-0.00145711	-0.0531344	0.122686	0.24376	0.124027	-0.0461635	-0.0398768	-0.16159	0.0839242	0.158664	0.00405875	0.191609	0.164439	-0.0109911	-0.0333615	0.0473325	-0.283375	-0.180616	0.0743216	-0.101104	-0.303051	0.173383	0.136212	-0.0583251	-0.0494311	0.179416	0.262522
PID_ERBB1_RECEPTOR_PROXIMAL_PATHWAY	-0.271654	0.265362	-0.125027	-0.124841	0.0199738	-0.156727	0.248697	-0.0684959	0.0824777	0.103629	0.106624	-0.251241	0.0855413	-0.0227743	-0.210903	-0.365399	0.00844931	-0.150615	-0.0201331	0.169674	0.277941	0.0863975	0.230123	-0.216565	-0.091738	0.0838529	0.263694	0.288259	-0.116834	-0.275528	0.135428	-0.0504256	0.135591	0.215484	0.225088	-0.28835	-0.155301	-0.0713777	-0.376508	0.133003	-0.0745012	-0.366067	0.0192214	-0.133707	0.143134	0.13007	-0.370903	0.0184219	-0.0498083
PID_TNF_PATHWAY	0.0791733	0.0378172	-0.24765	-0.158788	0.0899569	0.0210214	0.17871	0.0340077	0.379017	-0.137342	-0.0746385	-0.213039	-0.00130206	-0.169899	-0.107125	-0.21854	0.401814	-0.1168	-0.0799716	-0.120292	0.156982	-0.0529785	-0.125407	-0.170288	0.228009	-0.0926756	0.220053	0.32579	-0.120065	-0.243345	0.0922029	-0.155619	0.137558	0.0269094	-0.0759206	-0.27415	-0.155674	-0.178557	-0.353006	0.237399	-0.202983	0.0118367	0.0789732	0.152121	0.00214912	0.0279946	-0.00486138	-0.216197	0.147827
PID_PLK1_PATHWAY	-0.376449	-0.118305	-0.259758	0.433617	0.232498	0.00391917	0.0537682	-0.492572	-0.350218	-0.059917	-0.284922	0.0891685	0.530788	0.334128	-0.232879	-0.0868363	0.155809	0.35257	-0.0828496	0.136462	0.143679	-0.290515	0.388182	0.170899	-0.233217	-0.146355	0.18162	-0.127871	-0.100844	0.236201	-0.0646831	0.11199	-0.0428076	0.132177	-0.580162	-0.290927	0.17997	0.260295	-0.245846	-0.502926	-0.0740492	-0.234536	-0.0163637	-0.621568	0.328963	-0.328285	-0.154527	0.0373238	0.461362
PID_TCR_RAS_PATHWAY	0.208173	0.00319176	0.141173	-0.0831359	0.3558	0.00108364	0.150744	-0.382246	0.111952	0.319971	0.312225	-0.346166	-0.0772117	-0.425381	0.203971	-0.151868	0.210778	-0.0129477	0.312773	-0.338722	0.249269	0.145953	-0.387902	-0.178462	0.320397	-0.167376	0.144362	0.412861	-0.551444	-0.0699217	0.259956	-0.123401	-0.0421701	0.19813	0.241945	-0.227874	-0.216184	0.220432	-0.324109	0.0981013	-0.234559	-0.19608	0.229973	0.090407	0.108242	-0.430286	-0.178493	0.060725	0.196627
PID_IL5_PATHWAY	-0.468225	0.483271	0.267824	0.432647	0.336122	-0.214061	0.164271	-0.375067	0.190959	0.254244	-0.0649526	-0.196168	0.0437966	-0.126531	-0.351664	0.0210461	-0.419697	-0.18773	-0.225291	-0.102518	-0.242928	0.447822	0.0671619	-0.0168682	0.258056	0.344683	0.20242	0.192769	-0.0734954	-0.457007	-0.336012	0.332325	0.179125	-0.222149	0.255061	0.0263547	-0.305543	0.35819	-0.238219	0.350166	0.187292	-0.360628	-0.14631	0.043829	-0.439867	-0.308983	-0.0818607	-0.162748	-0.0848012
PID_FOXO_PATHWAY	-0.109929	-0.130043	-0.0238151	0.199138	0.109613	0.00554478	-0.112528	-0.0368118	-0.0194173	-0.199179	-0.151573	-0.0209697	0.0406173	-0.0809928	0.00307208	-0.267434	0.313886	-0.0486345	-0.119254	-0.118465	0.321516	0.0455924	0.218683	-0.0248036	-0.184771	0.0777671	0.282761	0.0880451	-0.0750957	-0.0646079	-0.0286704	0.0301	-0.265519	0.000724508	-0.0904121	-0.146251	-0.136807	0.146718	-0.0546566	-0.184718	0.0157624	-0.215787	-0.0653229	-0.0296711	-0.0350849	0.22283	-0.198847	0.0613695	0.226701
PID_VEGF_VEGFR_PATHWAY	-0.0922729	0.0745156	-0.149677	0.251151	0.442143	0.17797	-0.359251	0.107334	0.0841671	0.49257	-0.0598915	0.0940625	0.47729	0.477488	0.0766343	0.261916	-0.219517	0.193678	0.0676407	-0.29962	0.261031	0.184127	0.189643	-0.244059	0.0987867	0.0309884	-0.277106	0.360175	-0.151264	-0.179942	0.170334	0.249663	0.159536	-0.101433	-0.49398	-0.129096	0.140522	-0.166628	0.0972386	-0.476973	0.0702421	-0.314253	-0.326088	0.203804	-0.243721	-0.294588	0.217038	-0.029612	-0.362004
PID_THROMBIN_PAR4_PATHWAY	0.272992	0.431353	-0.0606488	0.151539	0.307413	-0.321983	-0.20035	-0.161847	-0.394277	0.070201	0.22907	0.236431	0.547706	0.174559	-0.161168	-0.289811	-0.309716	0.0134895	-0.195517	-0.060887	-0.0134425	0.192562	0.226745	0.0400719	0.132079	0.180218	0.103359	0.118563	-0.326347	-0.0228005	-0.265898	0.532495	0.00663012	0.055325	-0.108748	-0.147166	0.0794959	-0.143165	-0.441077	-0.147802	-0.357048	-0.351019	-0.286649	0.128982	0.294209	-0.0245358	0.0982014	-0.15726	0.388548
PID_MYC_PATHWAY	-0.0728349	0.410535	0.0657948	-0.422016	-0.432212	0.23153	0.263991	0.275564	-0.458997	0.0553675	0.119158	0.295948	-0.286028	-0.0643499	0.488852	-0.15001	-0.279093	-0.22302	0.37909	0.317378	0.0463987	-0.190462	0.219318	-0.119551	-0.041188	-0.070722	-0.107905	0.0921232	-0.261114	-0.26818	0.366511	-0.222637	0.184707	-0.0286938	-0.017268	0.250944	0.0231684	-0.41292	0.215205	-0.200032	0.122402	-0.246103	-0.174828	-0.187063	0.22848	0.274482	0.00588061	-0.19688	0.0880327
PID_RANBP2_PATHWAY	0.318192	0.302385	-0.0111002	0.231692	-0.121196	0.0344178	-0.0211952	-0.531022	-0.186088	-0.208874	0.683773	0.449149	-0.176611	0.456417	-0.0217943	-0.498771	-0.301531	-0.0728303	-0.127076	0.157699	0.0783962	0.45555	0.257136	0.287739	-0.538966	0.418136	0.366628	-0.643721	0.522552	0.592159	0.0736156	-0.139785	0.267877	0.0372756	0.0714043	-0.594875	0.143106	-0.0564485	-0.00363733	-0.5433	-0.382035	0.232124	-0.297127	-0.528438	0.187749	0.109192	-0.639611	0.155936	0.532108
PID_PI3KCI_PATHWAY	0.239957	0.0325792	0.15184	0.182829	0.217144	-0.21015	-0.0575163	0.198638	-0.088253	0.25496	0.0113117	-0.0359233	-0.101009	-0.119004	0.0692828	-0.175038	0.0436067	-0.0843526	-0.111011	-0.0127968	0.150772	0.0996823	0.202223	0.341744	-0.169188	0.136689	0.0388271	0.202703	-0.258433	-0.0590012	0.164044	0.0863773	-0.323384	0.0526593	0.0208337	-0.228996	-0.0211797	0.00513014	-0.308094	0.00405188	-0.170438	-0.0375691	-0.0877125	-0.223545	0.260524	0.0699205	-0.0809603	0.0602026	0.172557
PID_AJDISS_2PATHWAY	0.200007	-0.0378853	0.0738533	0.28978	0.332887	-0.145247	-0.173281	-0.262318	-0.14419	-0.134735	0.111257	-0.0547811	0.173573	-0.158591	0.108389	-0.278258	0.00258594	0.0292967	0.0439306	-0.136062	0.265461	0.328591	0.0332301	0.0216133	-0.078405	0.183818	0.313638	0.204502	-0.208054	-0.11351	-0.102405	-0.133275	-0.0430042	0.165126	0.0747835	-0.0447238	-0.0683297	0.248558	-0.458536	-0.225067	-0.00807579	-0.385349	-0.068162	0.00537072	0.0361499	0.118098	0.0689994	-0.242116	0.0950723
PID_IL2_PI3K_PATHWAY	0.0818231	0.0432491	0.315367	0.0639038	0.180855	-0.117249	-0.00629992	-0.112063	0.0739115	-0.0332601	-0.145975	-0.212242	-0.0450498	-0.0523132	-0.0558534	-0.215368	-0.0450633	-0.123463	-0.163373	0.0692937	0.0166509	-0.133265	0.278243	-0.148221	-0.00985084	0.398927	-0.165906	0.061555	-0.416351	-0.057417	0.0760451	0.204174	-0.0887225	0.0318277	0.200722	-0.162693	-0.0731734	-0.00895854	-0.376674	0.064808	0.0902229	-0.0715215	-0.196227	0.12655	0.200286	-0.0101631	-0.145093	-0.148398	-0.0676069
PID_CERAMIDE_PATHWAY	0.176316	-0.166404	-0.113779	-0.0430269	-0.0343464	0.0831073	-0.186225	-0.161738	0.326944	0.177986	-0.137779	-0.0853225	0.0584976	-0.118347	0.01166	-0.074045	0.373564	-0.152494	0.319227	0.0920192	0.185737	-0.179975	-0.123987	-0.103683	0.277744	-0.0883534	-0.19527	0.208172	-0.195378	-0.0435709	0.281677	-0.340773	0.00100208	-0.0952707	-0.121252	-0.2625	0.00299895	-0.0865095	-0.232549	-0.0806164	-0.251302	0.199104	-0.13362	0.071422	0.0573653	-0.150878	-0.190105	-0.112496	0.00105915
PID_P53_DOWNSTREAM_PATHWAY	0.237457	-0.139912	-0.0609191	-0.079028	-0.214855	-0.0242291	-0.154005	-0.00448484	-0.101232	0.211923	-0.241441	0.0470315	0.103032	0.0891525	0.00967264	-0.0446324	0.190756	-0.200363	0.0540444	0.247594	0.364431	-0.0238136	-0.179134	0.0342228	0.185046	-0.0359897	0.164489	0.0766721	-0.245479	-0.154893	-0.00659037	-0.25462	-0.137969	-0.111826	0.174881	-0.118225	0.00247579	0.0404248	-0.251071	-0.00165285	0.0193767	0.10798	-0.122137	-0.039568	-0.0244286	0.111558	0.05881	0.0871572	0.141373
PID_AR_TF_PATHWAY	-0.0357005	-0.0742056	0.121807	0.163777	-0.0803854	0.03411	0.0452862	-0.248564	-0.286095	-0.00546427	-0.165005	0.35842	-0.0151584	0.0917101	0.173627	-0.202488	0.135674	-0.0394689	0.123688	0.112081	0.171395	0.0401954	0.178697	-0.136184	-0.060255	0.301997	0.172555	-0.0408821	-0.177969	0.10129	0.20074	0.338567	-0.352163	-0.148736	0.143035	-0.114392	-0.217649	-0.202611	0.0308542	-0.184487	-0.156315	0.0437815	-0.22996	-0.192749	-0.0663673	0.174785	-0.179526	-0.0377847	0.194055
PID_P75_NTR_PATHWAY	0.0375996	-0.267007	-0.0721228	0.1884	0.0852382	-0.0600027	0.151614	-0.162345	0.201171	0.16586	0.0815983	-0.249977	0.0784814	-0.133109	-0.14101	-0.107177	-0.079423	-0.229562	0.0606408	-0.193541	-0.0463555	-0.0169733	0.0678023	-0.0205831	-0.0942075	0.177561	0.217979	0.300407	-0.0274188	-0.294719	-0.169852	-0.119854	0.252191	0.181384	0.0413602	-0.166078	0.0497474	-0.164758	-0.271884	0.166162	-0.0721082	-0.156107	-0.0551465	0.0469822	0.00810614	-0.138946	0.293833	0.127017	0.0568635
PID_S1P_META_PATHWAY	-0.254444	0.187145	0.0422414	0.113492	0.0550555	-0.108802	0.352569	-0.199242	-0.312181	-0.121141	0.226646	0.207349	0.270792	0.3238	-0.139564	0.0456806	-0.182481	0.0727099	0.243031	-0.395739	0.186215	0.085948	-0.231626	-0.238055	-0.303503	0.0786434	0.216119	0.32783	-0.342805	0.105153	-0.309814	0.150178	0.317012	0.0626638	0.0523907	-0.0944134	-0.267052	0.117665	-0.0557429	0.202373	-0.0631921	0.0102168	-0.254603	-0.216275	0.0848531	-0.222977	0.0986856	0.00492778	-0.0719647
PID_ECADHERIN_NASCENT_AJ_PATHWAY	-0.081463	-0.0746061	0.0497178	0.143583	-0.00935093	0.00626229	0.155825	-0.255293	-0.156712	-0.039205	0.0949853	-0.214049	0.0429639	0.0983227	-0.0581652	-0.409371	0.064459	-0.221238	-0.0122646	-0.191134	0.212491	0.174038	0.204484	-0.041545	-0.0769244	0.0951483	0.368897	0.224298	-0.291715	0.010307	0.170976	0.089776	-0.078287	-0.0199773	0.142485	-0.0263774	-0.202636	-0.227095	-0.176399	0.0351241	0.191763	0.021913	-0.11508	-0.20009	-0.244542	0.174001	-0.312732	-0.212907	-0.0256064
PID_INTEGRIN4_PATHWAY	0.320492	-0.14691	-0.166714	-0.0762147	-0.0254735	-0.348576	0.0466265	0.280457	0.511234	0.0382853	0.0196601	-0.337165	-0.256879	-0.126802	-0.221457	0.0552603	0.644531	-0.721323	-0.282802	-0.246369	0.60256	0.00674542	-0.635768	-0.0980941	0.436963	-0.0412314	0.244329	0.455421	-0.0826559	-0.62497	0.00721671	-0.164738	0.219482	-0.116775	-0.0313463	0.124227	-0.137403	0.214258	0.231651	0.239113	0.0896106	-0.201439	0.416932	0.104403	-0.393426	0.28754	-0.0882185	0.513343	-0.536799
PID_AMB2_NEUTROPHILS_PATHWAY	0.386102	0.0701389	-0.0758428	0.172663	0.14772	-0.285396	-0.182566	0.225389	0.209117	-0.00854452	-0.123977	-0.202566	0.0142037	0.0738258	0.0187985	-0.149831	0.268867	-0.179705	0.016553	0.157927	-0.20448	0.171563	-0.0526944	0.117881	0.214062	0.1901	0.210293	0.268323	-0.129187	-0.0444963	-0.21984	0.256017	-0.338101	0.105421	0.285819	-0.00415339	0.137006	-0.330514	-0.177533	-0.0951318	-0.101999	0.0667133	-0.151262	-0.0474313	0.0919856	-0.161792	-0.206824	0.155065	-0.061442
PID_AVB3_INTEGRIN_PATHWAY	0.15071	0.156347	-0.0476549	-0.0569042	0.168328	-0.200058	0.114142	0.109652	0.0782742	0.259301	-0.0182425	0.220683	-0.121088	0.0665518	-0.241846	-0.134576	0.254025	-0.197552	-0.047864	0.0327262	0.244131	-0.082338	-0.0754437	-0.142509	0.0742584	0.044113	0.236998	0.403022	-0.173692	-0.114764	0.0326532	0.0574243	-0.0638821	0.0664372	0.204057	0.168572	-0.00907388	0.0982412	-0.234008	0.0454582	-0.0761339	0.190846	-0.0132482	-0.092384	-0.16401	0.0206925	0.0918612	0.00901678	-0.229737
PID_IFNG_PATHWAY	0.286901	0.0526516	-0.0171182	0.101122	0.131845	0.0779703	-0.109404	-0.126674	-0.0806685	0.0412339	0.00751158	0.0198622	0.258004	0.219499	-0.166739	-0.177567	0.215361	-0.273692	0.117183	-0.223692	0.249297	-0.00561359	0.0877031	-0.211544	0.273759	0.142921	0.0664996	0.1789	-0.249711	-0.266879	0.070986	-0.0362424	-0.137412	0.0144806	0.255111	0.0399163	-0.144297	-0.101794	-0.361909	-0.200916	-0.223661	-0.125723	-0.347349	-0.00783996	-0.144607	-0.20629	-0.237643	0.0162974	-0.179096
PID_RXR_VDR_PATHWAY	-0.28381	0.0532377	0.273896	0.113594	0.171386	-0.0493452	-0.0128403	-0.0797037	-0.10413	0.0164222	-0.210175	0.0676136	0.0676575	0.100361	0.334497	-0.0869321	-0.00896575	-0.2759	0.17362	-0.275224	0.411685	0.132204	0.268308	-0.183772	0.129706	-0.081225	-0.0313773	0.374953	-0.445556	-0.0392585	0.147887	0.0622228	-0.308311	-0.147763	0.151675	0.154367	-0.100596	0.242897	-0.0795957	0.211103	-0.0818901	0.292523	0.0969891	-0.00618775	-0.422631	0.16895	-0.35271	0.245976	-0.343622
PID_LIS1_PATHWAY	-0.346723	0.201771	0.0283701	0.248752	0.03116	-0.114002	0.0432993	-0.400302	-0.258995	0.075864	0.0909961	-0.0279396	0.1812	0.329779	0.203724	-0.122149	0.0256585	0.261271	-0.0299757	-0.195037	0.265513	-0.122465	0.192114	0.244934	-0.155703	-0.0639468	0.313662	-0.0266805	-0.033306	-0.161353	-0.0660492	0.0986106	-0.0437733	0.221056	0.147036	-0.129974	-0.0129536	0.0775703	0.0695654	-0.187322	-0.0446753	-0.273023	-0.187716	-0.00419456	-0.309105	-0.0654771	0.165709	0.238822	0.157486
PID_ERBB1_DOWNSTREAM_PATHWAY	0.0688091	0.174957	-0.085864	0.201286	0.253764	-0.203463	0.0298814	-0.117675	-0.00803697	0.182934	0.209205	-0.223685	0.092074	-0.0863617	-0.0296222	-0.142073	0.0459923	-0.112722	-0.154795	-0.178804	0.360254	0.0576071	0.0288768	-0.0988022	0.0508873	-0.0388144	0.106671	0.171595	-0.168216	-0.207141	0.073406	-0.13597	0.0707977	-0.0784576	0.132103	-0.275715	-0.17429	-0.0237401	-0.320639	0.109564	-0.270097	-0.214579	0.0523623	0.107623	0.0998436	-0.0610022	-0.207918	-0.0421064	0.0467417
PID_SYNDECAN_4_PATHWAY	0.335079	0.193224	-0.260568	0.133038	0.279611	0.147271	0.331763	0.0981328	0.268724	0.24933	-0.255757	-0.0553864	0.337475	-0.20357	-0.0961626	-0.377872	0.104496	-0.053108	0.250428	-0.210692	-0.110637	0.200205	0.0845009	0.25085	0.388836	0.0778132	0.0653761	0.521568	-0.153593	-0.224212	-0.153179	0.0367741	-0.488977	-0.0787439	0.267622	-0.0932657	-0.294278	0.162281	-0.417365	0.190046	-0.0974991	0.160443	-0.165261	-0.156441	-0.119014	0.176095	-0.360983	-0.143814	-0.427738
PID_ATF2_PATHWAY	0.153858	0.0227071	-0.0342754	0.126057	0.171419	-0.0792207	-0.335739	0.0754381	0.2338	0.0881256	0.0274965	0.0819873	0.264591	0.150886	0.220091	0.182707	0.0464002	-0.16867	-0.0871525	0.0870738	0.093327	0.213917	-0.00292309	-0.098259	-0.03522	0.136513	-0.106046	0.0785602	0.101571	0.0440345	-0.0279598	-0.138526	-0.237862	-0.18074	0.2601	-0.35282	-0.147127	0.230835	-0.251447	-0.218569	-0.201635	-0.0665429	-0.196863	0.0462046	0.0315972	-0.0265119	0.0422105	0.0189398	0.0310921
PID_AP1_PATHWAY	0.308387	-0.119442	-0.0123396	0.290301	0.261191	-0.142104	-0.100478	0.108135	0.239025	0.119182	-0.0803519	0.152147	0.0693341	0.182801	0.0197603	0.0159029	0.12747	-0.178065	-0.0831749	0.0668762	0.273496	0.195438	0.0737779	-0.035046	-0.00953486	0.10834	0.250696	0.164335	-0.105249	-0.282493	-0.146037	-0.148192	-0.221553	-0.0824846	0.19508	-0.266219	-0.319543	-0.109053	-0.238642	-0.00140587	-0.189083	0.133782	-0.144738	0.164245	0.0973658	0.0858169	0.0261341	0.0166327	0.0390518
PID_INTEGRIN2_PATHWAY	0.253802	-0.0700665	0.128144	-0.22706	0.202219	-0.158387	-0.170299	0.185953	0.537688	-0.0489319	-0.192405	-0.225074	-0.293602	-0.194199	0.0128432	-0.0523054	0.0617045	-0.0668307	-0.114831	0.201973	0.225358	0.289187	-0.0764836	0.146984	0.256487	0.173126	0.141511	0.128358	0.00167661	-0.244995	-0.00987633	0.0205551	-0.271552	-0.182743	-0.0541834	-0.388886	-0.0717685	0.0612273	-0.19066	0.0818989	-0.261245	-0.06983	0.144511	0.571938	-0.0639236	0.0603147	-0.256814	-0.193648	0.174342
PID_UPA_UPAR_PATHWAY	0.3198	-0.234495	0.0136106	-0.0646237	0.00541705	0.0733816	0.01211	0.219148	0.280736	-0.0575453	-0.287118	-0.11446	0.0259366	-0.0851003	0.0150426	-0.208307	0.144184	-0.14999	-0.103255	-0.154985	-0.08909	0.101089	0.0529884	-0.0901507	0.277125	0.104429	0.00451719	0.310003	-0.139607	-0.281158	-0.0989174	-0.164346	-0.140422	-0.0898462	0.388735	-0.247232	-0.340188	-0.321914	-0.130343	0.382548	-0.0503253	0.136142	0.0990665	0.459305	0.100761	-0.00976317	0.00924173	0.128378	-0.0643564
PID_ERBB2_ERBB3_PATHWAY	-0.216651	-0.032585	0.0512365	0.0454208	-0.0213507	-0.193146	0.196125	-0.371973	-0.101914	0.0315807	0.153728	-0.19899	0.108662	0.161852	0.23318	-0.0206363	-0.032403	0.108021	-0.0341642	0.0959672	0.213544	-0.146326	-0.0353895	-0.0357388	-0.122045	0.156147	0.0958532	0.0778318	0.000589815	-0.109487	-0.103132	-0.0351071	0.00107011	0.0122645	0.142566	-0.30889	-0.293236	0.0478755	-0.334122	0.0339972	-0.138096	-0.00359654	0.0661008	-0.0113681	0.0785425	0.0201808	-0.0391351	0.174079	0.0885189
PID_FOXM1_PATHWAY	-0.0898714	0.0710832	0.0855733	0.431729	0.115804	0.30275	-0.0500563	-0.016087	-0.377351	-0.343776	-0.323087	0.301929	0.323063	0.419237	-0.100167	0.14907	0.21873	0.0669327	0.262796	0.0840115	0.352982	-0.0842334	0.282635	0.29878	-0.16412	-0.135404	0.294819	0.173936	0.0235631	-0.0130156	-0.0969523	-0.0501171	-0.0596611	-0.0645921	-0.378842	-0.128201	-0.103707	0.293591	0.0224931	-0.527947	0.0249759	-0.0122733	-0.21589	-0.430987	0.182387	-0.195153	-0.363617	0.256098	0.0952556
PID_EPHA_FWDPATHWAY	0.241434	0.347716	0.20299	-0.0258955	-0.105996	0.195103	-0.0524639	0.335725	-0.0306125	-0.121066	-0.0823626	0.309221	0.448086	0.0550071	0.113053	-0.185089	0.373762	-0.0709981	-0.0195192	0.0239967	-0.00370216	-0.074355	-0.0303295	0.0936632	-0.171984	-0.210021	0.136688	-0.132549	-0.00250165	-0.137845	0.110433	-0.133349	-0.235509	0.12906	0.166355	0.0426353	0.133013	-0.0890132	0.0815817	-0.0450137	-0.175116	0.0906522	-0.0348894	0.0858968	-0.235961	0.0208658	-0.0936193	0.0684508	-0.206817
PID_HIF1A_PATHWAY	0.226597	0.0435825	-0.159704	-0.142015	-0.0348774	0.369151	0.242551	0.119545	-0.160782	0.0532563	-0.637969	0.104502	-0.19752	-0.153017	0.0705001	0.139325	0.266882	0.0424012	-0.100888	-0.0481833	0.163394	-0.546581	-0.0772409	-0.391226	-0.0681395	0.241156	0.0124537	0.399814	0.0687022	0.135735	0.146372	0.121082	-0.448523	0.15963	-0.0261783	0.242167	-0.128984	0.0282454	-0.12544	0.082379	-0.0404618	-0.217956	0.231533	0.0970432	-0.0122788	-0.0775405	-0.451275	0.460099	-0.198969
PID_BMP_PATHWAY	-0.0909346	-0.295252	-0.162387	0.481022	0.164198	-0.358449	-0.0957681	-0.0634091	-0.266492	0.011685	0.234801	0.211749	0.170124	-0.0180463	0.0548586	-0.332122	0.40447	0.131843	0.0439189	0.114354	0.267937	0.104378	0.0397099	-0.010259	-0.261531	0.160377	0.397663	0.0449033	0.238995	0.0508094	-0.154983	0.0511914	-0.0455944	-0.0200391	0.22927	-0.225022	-0.199775	0.233966	-0.373861	0.0372032	0.27374	0.142966	-0.194523	-0.186303	-0.184083	0.0935307	-0.134272	-0.140768	0.0642507
PID_IL3_PATHWAY	-0.28375	0.153544	0.285101	0.21459	0.0266986	-0.00381765	-0.15722	-0.221296	0.04828	-0.175708	0.123701	-0.217796	-0.0755916	0.299656	-0.297719	-0.113511	-0.302658	-0.268129	0.0544466	0.0268402	-0.0946439	0.321535	0.294467	-0.00425573	0.108767	0.512723	0.0937024	0.112141	-0.326805	-0.00812178	-0.0552707	0.282605	-0.0867222	-0.0762416	0.338665	-0.238608	-0.257943	0.0866236	-0.337047	-0.0676678	0.0686587	-0.248879	-0.176905	0.2283	-0.040569	-0.178304	-0.167349	-0.203364	0.278867
PID_IL6_7_PATHWAY	0.0621215	0.08731	-0.0015725	0.175989	0.321667	-0.164306	-0.15632	0.150892	0.0696555	0.223326	0.172199	-0.277923	-0.232531	-0.178237	-0.217636	-0.332836	0.169656	-0.303613	-0.260883	0.219174	0.0735424	0.0827707	-0.194669	-0.156526	0.161875	0.0418633	0.085358	0.314293	-0.277418	-0.296197	0.0533255	-0.0439552	0.0777226	0.0586607	0.367237	-0.413412	-0.167795	-0.00596984	-0.403363	0.169796	-0.322651	-0.0904531	-0.188887	0.330278	-0.163743	0.0234349	-0.150161	-0.088407	0.103004
PID_ECADHERIN_KERATINOCYTE_PATHWAY	-0.0521343	0.1785	0.0121286	0.177389	0.182438	-0.120316	-0.0396932	-0.157094	-0.253335	0.247934	-0.0812163	-0.0365966	0.0773257	-0.0454754	-0.0273039	-0.544462	0.163293	-0.312831	0.0255318	-0.2279	0.392929	0.0922164	0.22775	0.0609423	-0.152954	0.0273602	0.480521	0.41586	-0.218178	-0.125214	-0.0243109	0.291414	-0.206706	0.172934	-0.247381	-0.302037	-0.0572264	0.0903802	-0.426953	0.000915566	0.300884	-0.375906	-0.340886	-0.0881273	-0.253602	0.125969	-0.383216	-0.33498	0.220315
PID_ALK1_PATHWAY	0.186441	-0.367267	-0.328707	0.221702	-0.0555649	0.0168083	-0.200862	-0.0820381	-0.120737	-0.00411649	-0.243048	0.344061	0.210242	-0.0221657	-0.120317	-0.183338	0.11342	0.0468083	0.0269527	0.25324	0.181983	-0.00843905	-0.208711	0.0315619	-0.10028	0.282827	0.317528	-0.0130858	0.242311	0.264821	-0.267673	0.0109365	0.131802	0.172497	0.114449	-0.0760363	-0.389009	0.218526	0.00660964	-0.143962	-0.15439	-0.00103462	-0.0450325	0.209197	0.15531	-0.274598	-0.375996	0.18287	0.0146303
PID_PDGFRB_PATHWAY	-0.105869	0.270866	0.0670423	0.176428	0.159367	-0.0440843	0.177184	-0.0592574	0.0479912	0.153412	0.0212541	-0.125048	0.0604369	-0.0383983	-0.0532896	-0.070972	0.0891672	-0.218003	-0.058111	-0.1287	0.173511	0.0816182	0.119138	-0.0516012	0.0859083	0.056649	0.0443404	0.27399	-0.342868	-0.198026	0.119096	-0.0678716	-0.0271127	-0.0164703	0.197741	-0.168735	-0.115212	-0.147236	-0.23936	0.0235846	-0.0459508	-0.103008	-0.06127	-0.027193	-0.140122	-0.0990892	-0.225536	0.0302495	0.00956839
PID_TRKR_PATHWAY	-0.14002	0.137822	-0.0360772	0.0747491	-0.0374399	0.0205813	0.157638	-0.116234	-0.130372	0.117059	0.199269	-0.0382835	0.0754607	-0.0608482	0.217694	-0.098422	0.170806	-0.0698566	0.12138	-0.132626	-0.056578	0.172905	0.15733	0.189835	-0.0922556	0.00360783	0.292819	0.0531146	-0.121777	-0.055841	-0.0319347	0.0166693	0.0663934	0.0911472	0.0976765	-0.0943096	-0.0567849	0.0827644	-0.0892977	-0.19857	-0.0670116	-0.18098	-0.217281	0.109919	-0.108082	-0.0473478	-0.0182677	-0.0185225	-0.0951695
PID_TCR_JNK_PATHWAY	0.0140542	-0.388319	0.523553	-0.307735	0.0451673	0.0271346	-0.239798	-0.394436	0.00870604	0.49137	0.0913915	0.239081	-0.0248991	-0.211234	0.084578	-0.158865	0.491981	0.0749245	0.106975	-0.161442	0.223928	-0.403365	0.00400906	-0.178932	0.00100419	0.136775	-0.0883339	-0.250548	0.0623398	0.504523	0.111517	-0.000321124	-0.0818972	0.260631	0.226813	-0.353828	-0.136234	-0.0729176	0.0389323	-0.209725	-0.384863	-0.222791	-0.0721165	0.213709	-0.0471895	-0.211393	-0.207572	0.118947	0.201728
PID_NEPHRIN_NEPH1_PATHWAY	-0.321907	0.0633321	0.067468	-0.0823878	0.265795	0.0108805	0.013688	-0.0589153	0.0782087	0.251183	-0.0280784	-0.231586	0.258136	-0.0759408	0.125053	-0.00591958	-0.0452335	0.074081	0.0633903	0.000741645	-0.0411525	0.148612	0.29234	0.115144	-0.353391	0.294415	-0.0561586	-0.00224904	0.176413	-0.180007	-0.248831	0.243643	0.104582	-0.00929705	-0.0480155	-0.250876	-0.143127	0.0164405	-0.386032	-0.00301401	-0.227587	-0.53526	-0.0355174	0.123411	-0.0687145	-0.199922	0.199402	0.100876	-0.113911
PID_CMYB_PATHWAY	0.0372266	0.0204	0.123433	0.232385	0.0549972	-0.0582374	-0.240661	-0.0694119	-0.0915494	-0.0516728	0.124677	-0.0165949	-0.200284	0.0729193	0.237325	0.01718	0.115919	-0.133345	0.0369254	0.187769	0.235596	0.114493	0.0379856	0.25063	-0.0309621	0.0916778	0.214725	0.0208581	-0.224162	-0.117398	-0.098814	0.167427	-0.0624191	-0.0614914	0.0995496	-0.014454	-0.0741893	-0.000580098	-0.225173	-0.126691	-0.122826	0.119947	-0.117044	-0.113155	0.0176671	0.0141466	-0.282591	-0.17757	0.133557
PID_IL23_PATHWAY	0.10484	0.115488	-0.200472	0.129961	0.293149	-0.131102	-0.252945	-0.231985	0.328396	0.171321	-0.131507	-0.172838	0.161316	0.0946833	-0.0223156	0.059367	0.25107	-0.206086	0.249826	0.259972	0.225369	-0.0670669	-0.0743244	-0.220149	0.149908	0.0876348	-0.152907	0.231675	-0.014022	-0.173739	0.0587369	-0.165416	-0.045155	-0.269966	0.193419	-0.370521	0.0224696	0.102368	-0.227889	-0.121193	-0.0782553	-0.0407552	-0.325203	0.226878	-0.32551	0.192092	-0.0296186	-0.140974	-0.28096
PID_HIV_NEF_PATHWAY	0.188915	-0.401302	-0.285606	0.0214631	0.117702	0.109069	-0.0730857	-0.164615	0.326346	0.0768842	-0.194626	-0.134816	-0.0264461	-0.0551997	-0.0770367	-0.11071	0.451697	-0.307746	0.0694023	-0.147178	0.0868354	-0.115442	-0.265345	0.0647398	0.223838	0.233608	0.0438961	0.238046	-0.294255	-0.226783	0.365432	-0.450689	0.103295	0.0307151	0.00207544	-0.496237	-0.0235795	-0.239371	-0.432249	0.302567	-0.385314	0.162272	0.09781	-0.000365759	0.413785	0.0779147	0.0806884	-0.306157	-0.105277
PID_SYNDECAN_1_PATHWAY	0.175298	0.26547	-0.0192545	-0.0710947	0.024954	-0.225868	0.221166	0.0642172	0.224315	0.340091	-0.0704422	0.260066	-0.0150021	-0.117947	-0.164566	-0.0298182	0.38427	-0.204365	0.121925	-0.0888429	0.247029	0.0369967	-0.141695	-0.0137532	0.162465	-0.139797	-0.0111919	0.425303	-0.239779	-0.3879	-0.101948	-0.003245	0.0408891	0.0264131	0.250248	0.0544969	-0.00336081	0.0628056	-0.19921	0.137427	0.0353597	0.101541	0.27238	0.264286	-0.26386	-0.00353986	0.265059	-0.0468452	-0.376925
PID_P38_MK2_PATHWAY	-0.0821892	0.35617	0.0498444	0.194484	-0.175347	0.0942166	-0.165381	-0.340227	-0.316895	0.0753141	-0.286651	0.177899	0.0979821	0.133948	0.390474	-0.548495	-0.154477	0.0348702	0.143247	0.009833	0.486747	0.0795026	0.144278	-0.0854455	0.110549	0.0961362	-0.275178	0.164889	-0.110214	0.233878	0.196779	-0.00264709	-0.0765279	0.0437546	0.0265958	-0.279584	-0.175446	0.201665	-0.374402	-0.22991	-0.0493587	-0.0522007	0.000175182	-0.0882099	-0.254529	0.314884	-0.251553	-0.0705912	0.508395
PID_ERA_GENOMIC_PATHWAY	0.0799093	0.212943	0.204501	0.269331	-0.0171745	0.0239577	-0.225679	-0.0792038	-0.0650859	-0.086663	0.149215	0.249241	0.103405	0.33829	0.186651	-0.00208265	0.0274761	0.0591879	0.0202134	0.0984992	0.243654	0.302446	0.0429437	0.0350709	0.0220999	0.0787991	-0.0101613	-0.384483	-0.11624	0.112693	-0.131308	0.0555408	-0.235372	0.179637	-0.039199	0.253193	-0.253115	0.171925	-0.113206	-0.333715	0.306119	0.0470359	-0.319005	0.010489	-0.0618233	-0.120976	-0.351545	-0.106991	0.217981
PID_ERBB_NETWORK_PATHWAY	0.42911	-0.327735	0.380857	-0.306706	-0.564926	0.0737359	-0.11019	0.242564	0.437229	0.226719	-0.594766	0.243937	-0.13729	0.025756	-0.261661	0.380574	0.422213	-0.0836771	-0.224572	0.158162	0.0767586	-0.124464	-0.42247	-0.101325	0.146315	-0.561579	0.32031	0.0342441	0.228172	0.0683938	0.0634777	-0.460357	-0.191875	0.0719365	0.290041	-0.383558	0.110778	0.292729	-0.211886	0.199532	-0.646819	-0.11308	0.460471	0.355906	-0.214804	0.557274	-0.0939454	0.08491	-0.336839
PID_ALK2_PATHWAY	-0.154449	-0.188114	-0.457891	0.277024	0.322282	-0.302156	-0.274451	-0.0429591	-0.0453456	0.0790093	0.40277	0.299298	-0.0646556	-0.139759	-0.0398183	-0.208561	0.00304975	0.136938	-0.516695	0.523233	0.213936	0.0288662	0.0740273	-0.174762	0.088199	0.62467	0.341318	-0.40114	0.275936	0.433339	-0.344768	0.11224	0.0946344	0.106699	0.1889	-0.0358343	-0.255574	0.238347	0.165019	-0.0347631	0.107167	-0.162884	-0.283538	-0.0714667	0.155714	-0.0259886	-0.273769	-0.0314246	-0.00869826
PID_RHODOPSIN_PATHWAY	0.225857	-0.264059	-0.184621	-0.309268	-0.0421274	-0.136201	-0.257894	-0.0630615	-0.00591652	0.0306797	0.326932	-0.0673998	0.118896	0.246701	0.123443	-0.21696	-0.0781123	-0.100434	-0.345972	0.296449	0.0522022	-0.194741	-0.193821	0.158084	0.00943907	-0.0743874	-0.0715622	-0.0415235	0.133253	-0.110541	-0.167182	0.0420417	0.137503	0.154822	-0.289201	-0.189767	0.160787	-0.302711	0.55553	0.117785	-0.538826	-0.0551676	0.251567	0.0470575	0.0857541	0.109108	0.416023	0.501761	0.308399
PID_PDGFRA_PATHWAY	-0.365384	0.115408	0.211433	-0.281874	-0.115545	0.121662	0.144239	0.242544	0.0582231	-0.247828	0.0302254	0.154663	0.0379486	0.0743521	-0.103575	0.0239071	-0.133592	-0.246883	-0.0226964	0.0668796	0.314013	0.0744567	0.0758081	-0.138387	0.092575	0.116897	0.110354	0.216348	-0.0410646	-0.17788	0.161133	-0.199189	0.220785	-0.3123	0.489712	-0.11032	-0.137251	-0.0769094	-0.154483	0.263354	0.176705	-0.152733	0.117167	0.0138305	-0.520213	-0.09941	-0.154429	0.32069	-0.227477
PID_RETINOIC_ACID_PATHWAY	-0.240211	-0.0418845	0.138827	0.402211	-0.0213069	0.409737	0.316109	-0.268605	-0.495299	0.131754	-0.262928	-0.00787488	0.198456	-0.0179004	-0.157417	-0.204405	0.21913	-0.17185	0.131883	0.0842555	0.411501	-0.239595	0.354541	-0.160268	-0.117688	0.125357	0.0614543	0.244774	-0.481827	-0.0418715	0.157783	0.247683	-0.38114	-0.115251	0.136611	0.050895	-0.270962	0.270932	-0.0331567	-0.129084	0.132765	0.134548	0.0701702	-0.313378	-0.158759	-0.100543	-0.359365	-0.146542	-0.055877
PID_P38_GAMMA_DELTA_PATHWAY	0.0174334	0.660946	0.401794	-0.459	-0.00922579	0.436934	-0.15674	0.178653	-0.300236	0.0683273	-0.0895083	0.341229	0.0549325	0.454808	0.183581	0.310282	-0.311664	-0.140843	0.333266	0.241267	-0.190118	0.182782	0.131622	0.130048	0.0235905	-0.14553	-0.696366	-0.334527	-0.376785	-0.442033	0.215777	0.0435397	-0.0600774	-0.142534	-0.33787	0.453501	0.436541	-0.0420336	0.0486272	-0.287802	0.0737359	-0.146307	-0.296083	0.0539865	0.273821	-0.0287527	0.0129497	0.242058	-0.40453
PID_IL8_CXCR2_PATHWAY	0.0446416	0.164063	0.421718	0.366963	0.140336	-0.0529538	0.0648182	-0.146341	0.06613	0.172239	0.0442797	-0.119713	0.266803	0.173817	0.138468	-0.232737	0.298621	-0.211752	0.24137	-0.287683	-0.140214	0.250033	0.295886	0.342226	-0.0324783	0.039153	-0.125497	-0.0449181	-0.429245	-0.213905	-0.152396	0.102592	0.0201143	-0.214219	-0.0213266	0.286869	0.40869	0.097478	-0.03223	-0.260138	-0.103122	-0.0492026	-0.045598	0.111777	-0.0978413	-0.261845	-0.0810281	-0.17956	0.0821686
PID_HEDGEHOG_2PATHWAY	-0.265998	-0.229607	-0.151382	0.0414369	-0.0996859	-0.222862	0.45203	0.352999	0.0862701	0.207614	-0.125679	0.389178	0.208577	0.056302	0.0819428	0.42917	0.367041	-0.177842	0.125999	-0.193146	0.146472	-0.349195	0.203474	-0.463825	-0.137944	-0.0994722	0.175082	0.0744676	0.065715	-0.198111	-0.0989697	0.307014	0.260807	0.0232416	-0.143795	0.151902	-0.45577	-0.0244079	0.0561175	-0.134379	-0.0642927	0.106098	0.0765292	-0.272717	0.143261	0.258746	-0.256583	0.0935113	0.0378644
PID_INTEGRIN5_PATHWAY	0.32617	-0.0201406	-0.0740138	-0.188682	0.169297	-0.237899	-0.137983	0.131395	0.502002	-0.152415	0.041788	-0.106557	-0.235538	0.0943082	-0.524471	-0.371504	0.547274	-0.452669	-0.372751	0.360508	0.290509	0.201417	0.154171	-0.0857755	-0.100532	-0.186668	0.248856	0.602659	-0.333891	-0.272434	-0.281758	-0.273937	0.346229	0.12312	0.518271	-0.203707	-0.299497	-0.353546	0.0162404	0.29747	-0.198059	0.0528983	0.0918215	0.350251	0.0292482	-0.0801066	-0.106597	0.062549	0.0948426
PID_AR_NONGENOMIC_PATHWAY	-0.184068	0.120426	0.305362	0.237519	0.299068	-0.173207	0.0842844	-0.428209	-0.312268	0.27169	-0.00772043	-0.0174562	0.330864	0.400127	0.0584944	-0.290544	0.017869	0.210037	0.258576	-0.0537947	0.304849	0.220747	0.380255	-0.207585	-0.219621	0.18864	-0.132025	-0.104363	-0.0327781	-0.164673	-0.0284496	0.274673	0.225573	0.140437	0.0571863	-0.149993	-0.14961	0.054886	-0.164654	-0.345153	0.015162	-0.246187	-0.307791	-0.182024	0.0369283	-0.158891	-0.035409	0.0123061	-0.0324999
PID_ERBB1_INTERNALIZATION_PATHWAY	-0.0980165	-0.0351576	-0.0450316	-0.0266138	0.0385393	-0.32634	0.12934	-0.109715	-0.0977826	-0.0212043	0.0260586	-0.285848	0.127042	0.0599727	0.28669	-0.0532099	-0.0819541	-0.0113527	-0.121942	0.0906668	0.180614	0.0302319	0.149503	-0.0233879	-0.284259	-0.0446909	0.272596	0.116427	-0.150161	-0.200065	-0.207499	0.143792	-0.0151314	0.17851	0.253002	-0.029796	-0.23822	-0.187104	-0.00481022	-0.140813	0.216088	-0.10911	0.00228778	0.0679728	0.0622552	-0.164787	-0.0681473	0.176647	-0.0662478
PID_HEDGEHOG_GLI_PATHWAY	-0.236643	-0.177773	0.195975	0.280765	-0.125467	0.158483	0.342065	-0.139419	-0.323933	-0.114517	0.130944	0.169746	0.158284	0.379255	0.156139	0.323322	-0.0087924	-0.0138779	0.16772	0.0230512	0.202508	0.0381978	-0.0350702	-0.195274	-0.422029	0.0689721	-0.00592032	0.0100037	-0.050857	-0.105784	-0.112829	0.101931	0.1531	0.151597	-0.102914	-0.0473415	-0.06008	-0.0681602	0.0787017	-0.0462765	-0.0789555	-0.0367861	-0.161093	-0.264265	0.26979	-0.132208	-0.101419	0.0416892	-0.0656464
PID_CASPASE_PATHWAY	0.172607	-0.138703	-0.183407	0.140196	0.235998	-0.0660383	-0.194914	-0.187438	0.029663	0.217922	-0.114764	-0.0713162	0.147088	0.113894	-0.173992	-0.0417369	0.451832	-0.188937	0.0356711	-0.157938	0.233877	-0.043665	-0.0900974	-0.026459	0.0792719	0.095946	-0.00210093	0.318398	-0.0562224	-0.18246	0.153138	-0.252478	-0.0524163	0.0183141	-0.108963	-0.359365	-0.0166982	-0.12739	-0.279918	0.000133801	-0.230169	0.148872	0.0866056	-0.175475	0.0587789	0.0875531	0.164726	-0.18569	-0.0463401
PID_CXCR3_PATHWAY	0.0398562	0.141282	-0.239531	0.0034791	0.27756	-0.162404	0.132781	-0.214784	0.0461512	0.276894	0.327884	0.0808319	0.167814	-0.0254036	0.244503	0.0114398	-0.330319	0.0720163	0.219909	-0.0419552	-0.0123658	0.16739	-0.145711	-0.25172	-0.231781	0.000865357	-0.1184	-0.0237068	-0.0619348	-0.238519	0.139407	0.0280724	0.0768335	-0.116444	0.0971182	-0.198639	-0.0733558	-0.0169866	-0.112055	-0.208738	-0.216337	-0.165508	-0.0537905	-0.00403137	0.260262	-0.337954	-0.113254	0.106686	0.0187833
PID_BETA_CATENIN_NUC_PATHWAY	-0.0909186	0.0254243	-0.117255	0.140449	0.0112029	-0.0278599	0.0125134	0.0127694	-0.190441	-0.209436	-0.0282241	0.279527	0.179863	-0.066619	0.217145	-0.196847	0.343086	0.158053	0.0758667	0.20726	0.311518	0.065525	0.103446	0.0392984	-0.212499	0.162668	0.178334	0.0242989	-0.0845051	-0.145192	-0.0779699	0.153364	-0.0684836	0.00209946	-0.103592	0.114024	-0.215238	-0.00764155	0.0213515	0.0183432	0.0645768	-0.0766082	-0.119978	-0.285157	0.034695	0.0778973	-0.0241708	-0.00191061	0.253454
PID_VEGFR1_PATHWAY	-0.0494114	0.240651	0.183384	0.444399	0.139288	0.280054	-0.133753	-0.23622	-0.149578	0.292047	0.120555	-0.0531994	0.215697	0.0234605	-0.366572	-0.245229	-0.204875	0.249193	-0.00650521	-0.253705	0.177281	0.221622	0.303534	-0.151448	-0.264822	0.148666	-0.272066	0.176782	0.0662968	-0.113307	-0.0524586	0.422639	0.0349404	0.304935	0.205283	-0.0384252	-0.248769	0.603528	-0.4464	-0.292056	-0.0298482	-0.139897	-0.320387	0.0271389	-0.00257393	-0.199146	-0.0697959	-0.000570219	0.000661548
PID_SMAD2_3PATHWAY	-0.036779	-0.209621	-0.186106	0.439719	0.511603	0.33456	-0.284812	-0.0355231	-0.426031	-0.145147	0.349288	0.302027	-0.344087	-0.318706	0.0678071	-0.455618	-0.0464908	0.0197239	0.0975655	0.404071	0.583212	-0.160814	-0.00962956	0.0929142	-0.105516	0.247273	0.257041	-0.110846	0.211514	0.224349	-0.221187	0.23063	-0.197363	0.0412583	-0.274123	0.190561	-0.375097	0.198127	-0.295532	-0.377872	0.244121	-0.0592984	-0.367051	-0.47959	0.100844	0.152985	-0.605545	-0.148437	0.0146041
PID_P38_ALPHA_BETA_DOWNSTREAM_PATHWAY	0.266002	0.160085	-0.0154537	0.0752553	0.208121	-0.113986	0.108668	0.087988	0.132937	0.0164687	0.228362	-0.210336	0.110088	-0.168843	0.0684989	0.00679408	-0.0505765	-0.36229	-0.136412	-0.0134616	0.131056	0.198799	-0.0213273	-0.162301	-0.160868	-0.0419596	0.1432	0.138116	0.0926208	-0.274222	0.0983916	0.0977989	-0.234942	-0.100802	0.412258	-0.241237	-0.193371	-0.1258	-0.0674684	0.183722	-0.00714458	-0.123145	-0.200322	0.0431611	-0.0125974	0.054258	-0.141904	-0.228391	0.215596
PID_KIT_PATHWAY	-0.0809665	0.253382	0.0502324	0.239641	0.217011	-0.29565	0.0162653	-0.184842	-0.0859466	0.178752	0.304023	-0.0247508	-0.00218353	-0.0324805	0.0976814	-0.327358	0.0873144	-0.154173	0.157297	-0.0735802	-0.0632292	0.0503482	0.194552	-0.00873415	-0.00511773	0.232565	-0.0505178	0.0685582	-0.248804	-0.405528	-0.060811	0.0681594	0.112422	0.0601271	0.0115974	-0.1232	-0.0497656	0.092224	-0.382541	0.0918482	-0.00629999	-0.0329123	-0.11517	0.0683556	-0.177137	0.0420821	-0.0796738	-0.19968	0.190406
PID_ECADHERIN_STABILIZATION_PATHWAY	0.344226	0.177706	-0.0859412	0.103238	0.072662	-0.294765	-0.116179	-0.0528122	0.201247	0.00880665	-0.216047	-0.0438559	-0.0974846	-0.33618	-0.173195	-0.359055	0.222188	-0.363032	-0.22603	-0.0503684	0.42215	0.213565	-0.132237	-0.149604	0.443748	0.257184	0.309439	0.196851	-0.44903	-0.0740163	0.124755	-0.00635363	-0.384581	0.0055201	-0.00213512	-0.0628638	-0.1613	-0.0565572	-0.207678	0.178493	-0.232356	-0.360123	0.2557	0.046594	-0.27486	0.356219	-0.452391	-0.247562	0.0631734
PID_EPO_PATHWAY	-0.135424	0.156585	0.212933	0.126567	0.192663	-0.0839528	-0.112492	-0.289486	-0.0525118	0.0664852	-0.0247683	-0.24131	0.0225372	0.120235	-0.0725031	-0.0434878	-0.0596974	-0.311341	0.0476877	0.0831449	-0.0198052	0.118571	0.154186	0.023006	0.164779	0.218791	0.125199	0.0290564	-0.0654856	-0.167054	0.339808	0.0051967	0.0877569	-0.175947	0.141332	-0.19961	0.064538	-0.0946914	-0.248896	0.124075	-0.0546707	-0.0101685	-0.138882	-0.029482	-0.134483	-0.0320249	0.0575642	-0.375831	-0.00117573
PID_IL2_STAT5_PATHWAY	-0.0584869	0.152356	0.299567	-0.0663646	0.236705	0.0762627	-0.0810804	0.0158099	0.167727	0.14105	0.0267074	-0.207806	-0.334237	0.026563	-0.0847352	-0.322829	-0.152711	-0.424536	-0.177956	-0.0371801	-0.208455	0.0499205	0.119331	0.167598	0.183285	0.253213	-0.256798	0.0612977	-0.219677	-0.0228224	0.27063	0.0219055	-0.0401706	-0.291423	0.270998	-0.185037	0.0936568	-0.0237828	-0.126544	-0.0242573	0.0216139	-0.0338968	0.100003	0.126119	-0.145195	0.272177	-0.388929	-0.173829	-0.251737
PID_TCR_CALCIUM_PATHWAY	0.136497	-0.199105	0.0875617	0.31622	0.220416	0.155707	-0.304269	-0.135121	0.0907082	0.0137049	-0.0411196	0.130733	0.178547	0.217404	-0.0322074	-0.124383	0.177105	-0.061909	-0.202939	0.0407898	0.0955986	0.129701	0.071624	0.0841625	-0.196353	0.263222	-0.0253502	0.053877	0.295961	-0.122312	0.0971245	-0.0120381	-0.346696	0.118726	0.0173334	-0.390519	-0.256718	0.173845	-0.0945455	-0.154426	-0.179001	0.0426408	0.112892	0.055721	0.0391721	0.021269	-0.336078	0.0795056	0.232175
PID_DELTA_NP63_PATHWAY	0.0712729	0.342198	-0.0764004	0.169069	0.0680496	-0.309472	-0.142821	-0.170028	0.0676948	0.237582	-0.219361	0.0128166	-0.0926631	-0.130803	-0.023508	-0.153712	0.187712	-0.129812	-0.250169	0.17918	0.429322	-0.193712	0.229819	0.0166782	0.323954	-0.00290811	0.34214	0.0756819	-0.0517619	-0.254583	-0.0761471	0.116244	-0.352891	-0.0616318	0.021461	-0.226741	-0.335019	-0.0140469	-0.128927	0.147629	-0.171485	0.188767	-0.00362907	-0.269321	0.0479364	0.118955	0.0691923	-0.339832	0.187333
PID_VEGFR1_2_PATHWAY	0.0655103	0.227516	0.080467	0.0170739	0.0964379	0.103152	0.0470699	-0.0475143	-0.0664725	0.190112	0.102884	-0.119054	-0.108071	-0.0548634	-0.0398709	0.0032075	-0.0949645	-0.270113	-0.21195	0.112523	-0.0736501	-0.0540083	0.00170981	-0.117024	0.101598	-0.0528381	0.0365368	0.264803	-0.274642	-0.136746	0.107124	0.026197	-0.22564	0.0520728	0.170045	-0.0834098	-0.168866	0.243993	-0.142965	-0.0653225	-0.0159126	0.0590747	-0.0227564	0.0483289	0.0379922	-0.0758272	-0.267874	-0.0901752	-0.0447938
PID_THROMBIN_PAR1_PATHWAY	-0.0352341	0.222223	0.265008	0.141201	0.317297	-0.241124	0.211334	-0.212743	-0.0617771	0.116121	0.27609	0.00908596	0.356602	0.195307	-0.211164	-0.0934609	-0.0527977	-0.0789381	0.0179328	-0.119101	0.0487849	0.213082	0.245558	-0.0816465	-0.08807	0.0738012	-9.13e-05	0.170165	-0.355641	-0.226304	-0.141959	0.167948	0.0583194	-0.0127205	-0.109428	0.198082	-0.015934	0.123333	-0.119924	-0.16641	-0.0313715	-0.304734	-0.174493	0.0981312	-0.192264	-0.248643	0.0944311	-0.144262	-0.107113
PID_A6B1_A6B4_INTEGRIN_PATHWAY	0.056932	-0.0735186	-0.0423425	0.232202	0.0360689	-0.171796	-0.07404	-0.0312339	0.136769	0.0819552	-0.255491	-0.133171	-0.204182	-0.0293571	-0.0036123	-0.32444	0.390618	-0.382222	-0.0879747	-0.0367454	0.413417	0.136114	0.100701	0.105337	0.307071	0.0583196	0.158901	0.402309	-0.311932	-0.150221	-0.141503	-0.0858879	-0.115714	0.078495	0.0410587	-0.300995	-0.267692	0.241368	-0.273998	0.215305	-0.242922	-0.225368	0.276215	0.0381163	-0.299343	0.252708	-0.204129	0.143424	-0.0218455
PID_SYNDECAN_2_PATHWAY	0.166352	-0.185691	-0.196673	0.159035	0.0977574	-0.246926	0.0141181	-0.328401	-0.177934	-0.099506	-0.164382	0.0119769	0.318991	-0.135902	0.0308242	-0.196519	0.251979	0.0651516	0.157531	-0.0547457	0.0834292	0.016004	-0.117688	0.184074	0.00910283	0.0876766	0.125542	0.441625	-0.0342074	-0.121615	-0.0439447	0.000786518	-0.293027	0.288426	0.133869	-0.0689541	0.137894	0.190407	-0.230572	0.0263367	0.00322985	-0.0813556	-0.00648759	-0.279728	-0.0568286	0.105057	-0.260192	-0.0337156	-0.077679
PID_RAC1_REG_PATHWAY	0.167609	0.326521	0.377779	-0.116752	0.140854	0.19813	-0.411538	0.272506	-0.277422	0.172199	0.207988	0.151854	-0.0699459	0.287166	-0.0337642	0.134209	0.0247648	0.291977	-0.0494769	-0.110116	-0.301475	0.120669	0.151065	0.299059	-0.159614	0.0277982	0.0352163	0.0930932	-0.14536	0.124511	-0.209097	0.0414765	-0.0687019	-0.170582	-0.04934	-0.0905429	-0.0234757	0.208076	0.140022	-0.395106	0.0836462	-0.245064	-0.176762	-0.242969	-0.173021	0.159994	-0.102832	0.387444	-0.149662
PID_AURORA_A_PATHWAY	-0.219953	0.175732	0.066349	0.45247	0.237456	0.214128	-0.256111	-0.500598	-0.318335	-0.00812635	-0.452288	0.096034	0.467416	0.457659	-0.122558	-0.038091	0.157641	0.193043	0.481214	0.253823	0.29502	0.0718016	0.492581	0.197975	-0.210732	0.329544	0.139898	0.0610158	0.0843365	0.0293799	-0.205606	0.213686	-0.38455	0.171203	-0.363772	-0.393541	-0.130762	0.228911	-0.484588	-0.579662	-0.461108	-0.436685	-0.506445	-0.532647	0.173247	-0.286227	-0.00256894	0.126718	0.400962
PID_ARF_3PATHWAY	-0.0351118	0.251733	-0.00126723	0.290319	-0.26174	-0.176853	0.0955757	0.0851735	-0.03249	0.00139486	-0.168583	-0.191702	-0.417243	0.389135	-0.0049166	0.0876732	-0.187504	-0.189287	0.120144	-0.182516	0.270049	-0.367606	-0.0223519	-0.039613	0.336193	-0.0172348	0.0437108	0.32447	-0.332292	-0.431004	-0.0553344	0.215362	-0.281207	-0.370524	0.312415	-0.260575	-0.422639	0.112042	-0.258263	0.0895819	0.346639	0.284336	0.293626	-0.0576888	-0.439584	-0.218732	0.0524368	-0.0845701	0.0351358
PID_INSULIN_GLUCOSE_PATHWAY	-0.285825	0.109072	0.0444275	0.256298	-0.237124	0.0128774	0.0877383	0.0409707	-0.286211	0.107776	-0.204863	0.0872694	0.0451942	-0.0645493	0.123211	-0.108774	0.301965	-0.347464	-0.114482	0.17799	0.332991	0.127458	0.24825	0.220201	-0.0221766	0.254292	0.0852008	0.328796	-0.265901	-0.0788458	-0.127785	-0.13781	0.0213437	0.109854	-0.364977	0.103089	-0.0994608	-0.0285775	-0.0657727	-0.214742	-0.101844	-0.108653	-0.0957432	-0.0397097	-0.362897	0.0386303	-0.0357876	-0.144192	0.247769
PID_PI3KCI_AKT_PATHWAY	-0.306846	0.12814	0.0438774	0.303087	0.256115	-0.0194198	-0.118729	-0.276983	-0.368978	-0.108926	0.0402712	0.127761	0.208026	0.199707	0.259845	-0.454552	-0.139044	-0.0982581	0.0702058	-0.202	0.355406	0.22386	0.355586	0.186782	-0.239932	0.38703	0.189955	-0.0868557	-0.0516239	-0.138436	-0.195041	0.131374	-0.239962	0.218832	-0.113951	0.107137	-0.254118	-0.00407859	-0.312547	-0.400832	0.0657961	-0.106236	-0.322149	-0.141758	0.319164	-0.111369	-0.126979	0.000135436	0.350011
PID_SYNDECAN_3_PATHWAY	-0.0135192	-0.220576	-0.371529	-0.0577076	0.343564	-0.375073	0.203797	-0.599111	-0.117533	0.279043	-0.17036	0.259443	0.210076	0.234595	0.259562	-0.172295	-0.388597	0.22926	0.340225	-0.101842	0.0495175	0.371078	-0.103096	0.0355757	0.11081	-0.0630259	0.298907	0.458948	0.171007	0.178132	-0.341749	0.403621	0.343941	0.175588	-0.34804	0.0814186	-0.141301	-0.134919	-0.300559	0.0714421	0.208061	-0.325038	-0.325838	0.0414875	0.11813	0.0688091	0.0471174	0.132	0.0771877
PID_IL8_CXCR1_PATHWAY	0.136628	-0.0274793	0.341588	0.479758	0.256917	-0.143331	-0.00471224	-0.117998	-0.114905	0.334688	-0.120641	-0.00784689	0.368137	0.19159	0.0369968	-0.173822	0.304655	-0.158574	0.0328768	-0.252226	0.0942216	0.195662	0.0927137	0.307834	-0.000169983	-0.11241	-0.254255	0.0395049	-0.410104	-0.406129	-0.0128127	0.170459	0.0703508	-0.0361985	0.0895233	0.313092	0.451612	0.0704726	-0.0879269	-0.349364	0.0833016	-0.0869951	0.0552373	0.144436	-0.191968	-0.22241	-0.051438	-0.133475	0.215029
PID_MYC_REPRESS_PATHWAY	0.0698859	0.0009052	-0.145148	0.136753	0.0963682	-0.120063	0.0849181	0.116178	-0.00629652	0.0253295	-0.246056	0.216335	-0.18377	-0.118458	0.113946	0.00368827	0.293962	-0.333542	0.193585	0.114281	0.220653	0.0667006	0.0833011	-0.0279275	0.0166205	0.250681	0.336033	-0.0446836	-0.0550062	-0.0369024	-0.0301025	0.101289	-0.168808	0.15597	0.208815	-0.184861	-0.22344	-0.342362	-0.133508	0.0826581	-0.130079	-0.0447526	0.0119996	-0.210088	0.0316485	0.361623	-0.209829	-0.0294938	0.147842
PID_HIF1_TFPATHWAY	0.30261	0.298414	0.14016	0.179072	0.157061	0.0800998	-0.10498	0.0761821	0.317537	0.280391	-0.355085	-0.221334	0.0804298	0.0676807	-0.259655	0.171675	-0.154221	0.0679486	-0.223519	-0.0655871	0.24536	0.133549	-0.0735634	0.0880085	0.198501	0.378375	-0.0801437	0.094649	-0.0956386	-0.155628	-0.209756	-0.10007	-0.338201	-0.193964	0.251486	0.385441	-0.0579228	-0.0634898	-0.305216	-0.0926748	-0.223649	-0.240639	-0.278094	0.333656	0.0990543	-0.0255961	0.0624339	-0.0511534	-0.198861
PID_TAP63_PATHWAY	0.0631425	0.147221	-0.0858738	-0.0300517	0.0220612	0.0796726	-0.0765352	0.155597	0.128667	0.135679	-0.204906	-0.155286	0.0675842	0.146755	-0.0183896	-0.0483867	0.38454	-0.350976	0.168706	0.319792	0.443895	-0.188704	0.0273482	0.0426081	0.211075	0.00797805	0.263345	0.101288	-0.373445	-0.417252	-0.122324	0.0324071	-0.369116	-0.191007	0.0822701	0.0518277	-0.0472805	0.176741	-0.268659	0.0850417	-0.150529	-0.0869659	0.0360704	-0.104443	0.0705774	-0.0644783	-0.0558151	-0.234715	0.0506186
PID_EPHRINB_REV_PATHWAY	0.0537043	0.0291899	0.289496	-0.0177324	-0.0665065	-0.0919741	-0.270921	0.091319	-0.0322906	0.337301	-0.210035	-0.105715	0.345764	0.00584027	0.0398685	0.125518	0.020543	0.0569588	0.0302487	0.0270993	-0.12613	0.271699	0.417613	0.16755	-0.1326	0.0514428	0.0315933	-0.230579	0.0741798	0.0267014	-0.0551895	0.234657	-0.0701937	0.0311305	-0.132696	-0.0932982	-0.123875	-0.0506813	-0.168953	0.0277835	0.100053	-0.37009	-0.0739262	0.0469051	-0.101606	0.115536	-0.131247	-0.13658	0.26808
PID_BARD1_PATHWAY	0.135405	-0.28405	0.286746	0.142387	-0.153745	0.24177	-0.298215	0.325527	-0.556958	-0.332607	0.124572	0.429221	0.295907	0.113044	-0.219411	0.00204586	0.0724107	-0.17534	-0.227268	0.253091	0.210295	-0.0464172	0.130821	0.263695	-0.533441	0.0522575	0.449883	-0.271123	0.377006	0.176476	-0.0191693	-0.135705	0.0691101	0.210394	-0.0756501	0.147203	-0.0312261	0.161882	0.169959	-0.357306	0.0967911	-0.0146383	-0.252593	-0.565533	0.406872	-0.0594757	-0.190645	0.0915943	0.175782
PID_P53_REGULATION_PATHWAY	-0.22852	0.0306997	-0.046968	0.110578	-0.0886773	0.21864	-0.0158142	0.0218854	-0.460188	-0.0256385	0.0399055	0.257715	0.0149539	0.222339	0.388679	0.106774	0.184131	0.0407568	-0.0451831	0.350901	0.249631	-0.13066	0.0855503	0.0109976	-0.324738	0.178522	0.231645	-0.14235	0.0569264	-0.147892	-0.0321712	0.119908	-0.0247518	-0.113333	-0.0774522	0.0163692	-0.129617	0.0667925	0.0484721	-0.36316	0.145055	0.103798	-0.297943	-0.340541	0.0920911	0.0996424	-0.175036	-0.0292567	-0.0254396
PID_TOLL_ENDOGENOUS_PATHWAY	0.361026	-0.223743	-0.0801305	0.285668	0.425971	-0.252352	0.0385857	-0.0518385	0.365194	-0.236063	-0.117279	-0.272874	0.0524351	-0.297422	-0.312482	0.106252	0.423291	-0.243836	0.0391697	0.230682	-0.0368643	-0.0615542	-0.148059	-0.179965	0.227161	-0.0878315	0.328043	0.449618	-0.524207	-0.119234	0.0246121	-0.354264	-0.0764662	-0.362932	-0.0504664	-0.0703735	-0.217863	0.192299	-0.210808	-0.134635	-0.100713	0.126615	-0.158307	0.219048	-0.192872	-0.0229616	0.206899	-0.322247	0.223292
PID_NCADHERIN_PATHWAY	-0.0289722	-0.133485	0.29079	0.230279	0.139889	0.0114419	0.435092	-0.366937	0.0379438	-0.0850772	0.141255	-0.0821139	0.158528	0.0647584	-0.0871398	-0.353423	-0.298812	0.0511589	-0.345103	-0.153549	0.214984	-0.0958879	-0.0698255	0.0973647	-0.0769699	0.0316242	0.295	0.168787	-0.120812	-0.222288	0.0763905	0.159658	0.0961262	0.227948	0.0630111	-0.345346	-0.364819	0.0550037	-0.231575	0.172481	0.379084	-0.141205	-0.202943	-0.119718	-0.316615	-0.0956966	-0.293492	-0.0895762	0.0181001
PID_ANTHRAX_PATHWAY	-0.0583847	0.207014	-0.282561	-0.0698512	0.18513	-0.0135783	-0.39955	-0.106786	0.0315423	0.200268	0.0665897	0.20677	-0.100335	0.0279374	0.226307	-0.213602	0.456904	-0.305052	0.326967	0.0855633	0.225069	-0.12742	0.23563	-0.294423	0.377988	0.0581113	-0.205104	0.157348	-0.302814	0.0659487	-0.269351	-0.296057	-0.14454	0.119417	0.318609	0.0529465	-0.167457	-0.120479	0.159925	-0.373396	-0.3665	-0.0663324	-0.293359	0.391368	-0.31587	-0.30815	-0.360867	0.206018	-0.258258
PID_S1P_S1P2_PATHWAY	0.0642064	0.116684	-0.114014	0.244778	0.375594	-0.113009	0.2829	-0.437007	-0.27555	0.328937	0.372639	0.348571	0.367515	-0.0182895	-0.113774	-0.00880645	-0.159408	0.330054	0.16385	-0.250647	0.270582	0.116893	0.0837771	-0.282438	-0.196628	0.104768	0.151449	0.277518	-0.27802	0.0280986	-0.192171	0.160476	0.108647	0.116081	0.0930506	-0.369595	-0.188361	0.202147	-0.313143	0.0819082	-0.327886	-0.4376	-0.42106	-0.0201333	-0.149692	-0.212337	0.0985681	0.0380482	-0.120261
PID_RAS_PATHWAY	-0.122603	0.16378	0.116234	0.0135672	0.116704	-0.312695	0.0846596	0.116313	0.0851754	0.218914	-0.207094	0.111446	-0.125592	0.0433223	-0.0727496	-0.0252023	0.120485	-0.318881	-0.036238	-0.0476331	0.25153	0.314234	0.288833	0.164167	-0.151566	-0.0459552	0.116474	0.279633	-0.102014	-0.272878	-0.101942	0.165352	0.238355	-0.0299238	0.293656	0.0657962	-0.126296	-0.169188	-0.464797	0.0982261	0.144042	-0.0947306	0.250189	-0.0796602	-0.216703	-0.0571702	0.12738	0.318671	0.320956
PID_MAPK_TRK_PATHWAY	0.106818	0.1079	-0.106899	-0.246973	0.115981	-0.00333603	0.0197072	-0.168789	-0.02624	0.148374	0.344039	-0.304078	-0.193197	-0.226038	0.270117	0.0620784	-0.0378017	-0.101023	0.123405	0.0325758	0.146251	-0.0985287	-0.0464402	-0.221073	0.277231	0.0889509	0.253301	0.247838	-0.120798	0.0728729	0.322878	-0.167236	0.112501	0.0494827	0.208635	-0.279344	0.269684	-0.0903028	-0.0166335	-0.156493	-0.389442	-0.271036	0.0242366	0.221664	0.259941	-0.216964	-0.152023	0.106157	0.00396164
PID_PI3K_PLC_TRK_PATHWAY	-0.328025	0.177244	0.138905	0.104392	-0.00509988	-0.0363316	-0.135301	-0.112507	-0.280152	0.0905536	0.103049	0.0133065	0.150032	0.221782	0.252174	-0.227907	-0.0075515	-0.192413	0.169633	0.0136862	0.164012	0.312579	0.300623	0.1978	0.00189303	0.0837283	0.286239	0.0520182	0.196213	-0.190338	-0.263699	0.0817602	0.360644	0.245647	0.00549925	-0.176402	-0.147268	-0.00988522	-0.362936	-0.322588	0.155532	-0.192548	-0.238641	-0.225822	-0.10247	0.0778576	0.0786142	0.112856	0.23406
PID_CD8_TCR_DOWNSTREAM_PATHWAY	0.146592	-0.0677043	-0.13126	0.0116671	0.376676	0.0162612	-0.0877052	0.0182275	0.199748	0.265228	0.00305651	-0.0657609	0.0891625	0.0045648	0.0582419	0.0251149	0.127178	-0.0303202	0.143839	-0.201822	0.128162	-0.092192	-0.224242	-0.110413	0.191359	-0.197073	-0.0364067	0.100054	-0.106639	0.0775621	0.146851	-0.13823	0.0276793	-0.0788258	0.202483	-0.373255	-0.0232656	-0.000664766	-0.246543	-0.0119522	-0.0616698	-0.137731	0.130317	0.232188	0.0316526	-0.167527	-0.0405416	0.0757362	-0.118561
PID_EPHA2_FWD_PATHWAY	-0.0367112	0.177869	-0.00660821	0.14378	0.0020217	-0.18302	0.0275717	0.0326099	-0.130872	0.404229	0.224095	-0.0250127	0.20522	-0.169353	0.327471	-0.554268	-0.145713	-0.00710029	0.0736916	-0.004371	0.0109685	0.415988	0.262954	-0.190902	-0.176067	0.21093	0.321394	-0.0221362	-0.414165	-0.0702524	-0.179392	0.356953	-0.243457	0.138632	0.220848	-0.0752645	-0.228794	0.174575	-0.327724	-0.0413097	0.261101	0.0436684	-0.335789	-0.174275	-0.221549	0.0854527	-0.248473	-0.215834	-0.0756143
PID_LYMPH_ANGIOGENESIS_PATHWAY	-0.113239	0.333416	0.00349146	-0.162054	0.0615068	-0.192639	0.0924809	-0.075201	0.11321	0.151528	0.0095497	-0.24459	-0.10068	-0.114957	-0.164433	-0.356183	0.193661	-0.343582	-0.0358737	-0.0163368	0.181671	-0.160213	0.276249	-0.037497	-0.0453974	0.289995	-0.0701495	0.33068	-0.0041611	0.180781	-0.0603611	-0.018592	0.36576	0.0552013	0.214693	-0.227586	-0.325693	0.0878506	-0.217181	-0.207097	0.147248	-0.0426897	0.116052	-0.00309748	-0.176781	-0.0988418	-0.240627	0.238969	-0.296945
PID_ALPHA_SYNUCLEIN_PATHWAY	0.217071	0.216321	0.176068	-0.162166	0.28327	-0.00914521	-0.277411	-0.244528	-0.099575	0.269659	-0.029177	-0.0989398	-0.113337	0.00385002	-0.130015	-0.0292798	-0.0477108	-0.116696	-0.0225943	-0.0205277	-0.0431511	-0.0984527	0.187334	0.141724	0.195583	0.04832	-0.181107	-0.0956348	-0.191427	0.0549957	0.206379	0.189059	-0.117856	0.0172783	-0.148312	0.0471436	0.140964	0.19833	-0.328246	-0.0896988	-0.108589	0.0561768	0.193329	0.0937054	0.136799	-0.0384572	-0.16916	-0.209349	0.0237274
PID_FGF_PATHWAY	0.0123836	0.0313015	0.0983538	0.00159323	0.19089	-0.17898	-0.0683444	-0.165544	0.0223141	-0.0823766	0.00186911	-0.0709966	0.00111757	-0.10202	0.0680071	-0.267883	0.0592355	-0.284476	0.100391	-0.0680313	0.135173	0.140515	0.0476336	-0.19287	0.209118	0.144833	0.117189	0.0645287	-0.131361	-0.305469	0.111616	0.178241	0.189537	0.0410718	0.181085	-0.0389956	-0.125013	-0.0929062	-0.434174	0.0816476	0.165001	-0.0693739	-0.0839884	-0.000109053	0.0204103	0.105493	-0.0417768	0.0188736	0.0454794
PID_INTEGRIN_A4B1_PATHWAY	0.375757	-0.09501	0.233508	-0.0270717	0.197828	-0.0120653	0.182637	-0.171732	-0.0165102	-0.100925	-0.304122	-0.220571	0.267596	0.191727	-0.178107	-0.289903	0.125254	0.0426682	0.0654663	-0.045638	0.0961707	-0.129325	0.218404	-0.127454	0.137476	0.198419	0.208801	0.376983	-0.236083	0.300088	0.0130813	0.073299	-0.198761	0.239718	-0.0477088	-0.241322	0.00115788	-0.0263832	-0.336594	0.0353905	-0.31768	0.0772438	-0.245494	0.257125	-0.0112271	0.101531	-0.0514098	0.170653	-0.331724
PID_RAC1_PATHWAY	-0.101824	0.23918	0.0791372	0.155651	0.158584	-0.264898	0.0710786	-0.142034	-0.00791823	0.267789	0.00811749	-0.109797	-0.0476436	0.0962371	-0.010309	-0.183443	0.0558805	-0.264402	-0.0577903	-0.130353	0.115829	-0.157429	0.197932	-0.157421	0.340183	0.0556542	0.103595	0.160002	-0.362982	0.0908406	0.191599	0.0204784	-0.11865	-0.0965469	-0.189172	-0.20122	-0.0607136	-0.277028	-0.275539	0.0457356	-0.295535	-0.250747	0.00943099	0.0917164	-0.16366	0.0449708	-0.31531	-0.0444437	-0.0883467
PID_RB_1PATHWAY	0.0438136	-0.0339134	-0.0659274	0.255288	0.123139	0.16658	0.0541354	0.134055	-0.218157	-0.294997	-0.0363798	0.276023	0.198085	0.0622941	0.361124	0.0489102	0.0988555	-0.0699234	0.0600703	0.201148	0.0737485	0.0136057	0.0931075	0.0633927	-0.198839	0.175215	0.151624	0.0898606	-0.140101	-0.0369766	0.0591245	-0.029468	-0.211143	-0.0730421	0.0638858	-0.0325171	-0.147805	0.00879754	-0.175551	-0.166311	-0.169271	0.01269	-0.207258	-0.312211	0.291079	0.253496	-0.235638	-0.0783754	-0.0433324
PID_FAK_PATHWAY	-0.0550971	0.0175076	-0.270248	-0.00361749	-0.00985501	-0.115686	0.280435	0.145674	-0.0624332	0.118018	0.138142	-0.171355	-0.0651339	0.011578	-0.176663	-0.267831	0.222109	0.0402828	-0.154237	0.00822145	0.0594234	-0.00235676	-0.0975373	0.0410333	-0.14049	0.110198	0.341119	0.442661	-0.298928	0.0824205	0.0677491	-0.00991019	-0.18705	-0.200241	0.267887	-0.221063	-0.170827	-0.0147532	-0.188747	0.161859	0.0810008	-0.0478375	0.143585	0.00425264	-0.242011	-0.00689512	-0.154964	0.0713884	-0.056053
PID_HNF3A_PATHWAY	0.33808	0.294024	-0.128191	0.291152	0.0617964	0.124838	-0.224131	-0.0263533	-0.0398519	-0.325961	0.0203112	0.298585	-0.139829	0.264032	-0.120752	0.159136	0.0659769	0.0850813	0.157133	0.0621824	0.316189	0.261544	0.15637	-0.192686	0.129323	0.287482	0.0288962	-0.353539	-0.0578246	-0.166501	-0.329147	0.248223	-0.264462	0.0959846	0.197901	-0.034331	-0.295813	0.0737671	-0.189529	-0.327748	0.216381	0.0221479	-0.355587	-0.119216	0.0982629	0.208634	-0.164635	-0.163104	0.0266064
PID_TGFBR_PATHWAY	-0.0883897	-0.1155	0.115547	0.0749007	0.0897064	-0.0663309	0.234478	-0.0988182	-0.0281784	-0.168132	0.249761	0.190017	-0.0926139	-0.108342	0.086705	-0.349604	0.121782	-0.057111	-0.0886156	0.00785949	0.135594	0.127024	0.128957	0.0556212	-0.292475	0.0828046	0.398256	0.0464768	0.077692	-0.113435	0.00478579	0.128695	0.0439192	-0.236462	0.167744	0.0720281	-0.193824	-0.121281	-0.134325	-0.0892736	0.374137	0.192946	0.0500875	0.00164897	-0.213761	-0.0674603	-0.358088	-0.128957	-0.161473
PID_HES_HEY_PATHWAY	0.0538524	0.178945	-0.0659771	0.322903	0.193829	-0.110229	-0.322984	-0.262111	-0.28119	-0.00228593	0.0345149	0.309315	0.182355	0.290356	0.179359	0.0650849	0.173748	0.1376	0.172728	0.148716	0.279039	0.0118161	0.071395	-0.097637	-0.126283	0.17446	0.322792	-0.107797	-0.0982871	-0.0746126	0.047153	0.333826	-0.366921	-0.12372	0.00675424	0.0270319	-0.227082	-0.00724053	-0.329283	-0.208738	0.111694	-0.231329	-0.259434	-0.0861221	0.232514	0.0722694	-0.0738862	0.202432	0.146523
PID_IL12_STAT4_PATHWAY	0.020313	-0.145139	-0.246195	0.222098	0.130388	0.0757422	-0.0236308	0.110398	0.278203	0.21726	-0.116292	0.246246	0.0559538	-0.0678449	0.206501	0.00642583	0.273592	0.0117567	-0.0959524	-0.0689805	0.361377	-0.265066	-0.135998	-0.0148669	0.0328878	-0.0084087	-0.172695	0.272872	0.083925	-0.104923	-0.107819	-0.168127	-0.0267881	-0.275058	0.204008	-0.50908	-0.345566	-0.0564668	-0.167295	-0.0410338	-0.116468	0.0451213	-0.0639648	0.208505	-0.080927	-0.149627	-0.128637	-0.0316539	0.0492651
GLYCOGEN_BREAKDOWN_GLYCOGENOLYSIS	-0.0645492	0.149055	-0.0431922	-0.0281131	0.230925	0.282974	-0.189722	0.272219	0.0960387	0.0202749	0.00404294	0.11117	0.004029	0.065473	-0.34875	0.31453	-0.335368	-0.324406	-0.236834	-0.142557	-0.0169165	0.255416	-0.21887	0.282234	0.145647	-0.342864	0.0309389	0.156807	-0.161036	-0.144405	0.222561	-0.367677	0.0780907	0.0670047	-0.056567	0.201992	0.199492	-0.32446	0.176688	-0.229133	0.0717423	-0.229075	-0.013491	0.0630702	-0.225816	-0.324001	0.140761	0.0617541	0.129149
TRANSLATION	0.123272	0.0998593	-0.0927977	-0.338591	-0.352024	0.431992	0.214416	0.365407	-0.049631	-0.34079	0.281972	0.0401605	-0.490479	-0.0212303	0.21982	0.418591	0.0686416	-0.103037	-0.356011	0.371969	-0.0543119	-0.293653	-0.254409	-0.159639	-0.369011	-0.0475371	-0.0714555	-0.399859	-0.110571	-0.120006	-0.12034	0.148504	-0.156307	-0.24686	0.445035	0.414499	-0.333276	-0.214035	0.451093	-0.128591	0.488018	0.412207	-0.00858533	0.293658	-0.267459	0.0850315	-0.432508	-0.168492	-0.185785
PYRIMIDINE_CATABOLISM	0.445956	0.422465	-0.262948	-0.433028	0.207482	-0.235058	-0.378139	-0.111036	0.219704	-0.227214	-0.170002	0.321867	0.466288	0.18252	0.452585	0.303157	-0.101586	0.0114778	0.35006	0.223116	-0.293311	-0.222786	-0.0142834	-0.20971	0.451681	-0.209301	-0.351947	0.286647	-0.0875129	-0.281055	-0.433882	0.0912064	0.0163021	0.00113977	-0.0356015	-0.0908129	-0.143664	-0.445412	-0.0716081	0.509324	-0.0759777	-0.076255	0.0760718	0.232571	-0.198298	-0.466278	-0.00710921	0.0814187	-0.441243
RNA_POL_III_TRANSCRIPTION_INITIATION_FROM_TYPE_2_PROMOTER	-0.221165	0.232668	0.240745	-0.432617	-0.581221	0.408445	-0.0693652	0.251796	-0.210261	-0.485553	-0.160287	-0.0712351	-0.297475	0.303543	0.288779	0.126046	-0.249822	0.131406	0.483176	0.229862	0.0841399	-0.0120239	-0.471163	0.0548403	0.128263	0.0123964	-0.0341805	-0.420746	-0.109997	0.424978	0.262441	-0.226352	-0.248215	0.164143	0.0570985	0.263755	0.194544	0.385742	0.189333	-0.287461	-0.150845	0.261901	-0.118951	-0.0715467	0.0874369	0.21816	-0.344895	-0.0909795	0.244581
INHIBITION_OF_THE_PROTEOLYTIC_ACTIVITY_OF_APC_C_REQUIRED_FOR_THE_ONSET_OF_ANAPHASE_BY_MITOTIC_SPINDLE_CHECKPOINT_COMPONENTS	0.0202201	-0.299453	0.210491	0.0981781	-0.154871	-0.00181378	0.124056	-0.410174	-0.320122	-0.431421	-0.394538	0.156517	0.0958662	0.0965405	0.239726	-0.121123	0.384827	0.266621	-0.104439	0.2565	-0.291758	-0.0728452	0.343379	-0.069131	-0.124377	-0.106239	0.459249	0.0306305	0.182138	0.407754	0.0213772	0.0730262	-0.209412	-0.307625	-0.488277	-0.220981	0.097283	0.0628823	-0.142066	-0.452474	0.278408	-0.0143821	-0.0555616	-0.477488	0.309805	-0.30964	0.299616	0.091132	0.307346
PYRUVATE_METABOLISM_AND_CITRIC_ACID_TCA_CYCLE	0.195476	0.187852	0.261734	-0.437059	0.0895176	0.188958	0.014696	0.356202	0.374573	0.0860084	-0.340157	-0.336977	-0.124671	0.0238629	-0.22994	0.574386	0.0441022	0.0441223	-0.334439	-0.00251753	0.0549645	-0.244272	-0.219715	-0.0472503	0.289686	-0.521257	-0.193285	-0.0266864	-0.192317	-0.428752	-0.108245	-0.278245	0.0112004	-0.374475	-0.18561	0.449098	0.322452	0.249118	0.384767	-0.374515	0.205869	0.155042	0.0486872	0.0746325	-0.281622	-0.136248	0.00833931	0.16504	0.271938
EXTRINSIC_PATHWAY_FOR_APOPTOSIS	0.501625	-0.44416	-0.487767	-0.107945	0.360423	0.0712525	-0.109154	0.183755	0.481519	0.0146249	-0.305969	-0.374413	-0.058341	-0.375601	-0.273039	-0.176385	0.477076	-0.593502	-0.0562957	-0.310162	0.0376894	0.0901156	-0.30425	0.302075	0.549333	-0.188036	0.145504	0.627798	-0.421498	-0.132321	0.187046	-0.541876	0.259703	-0.163769	-0.257176	-0.607415	0.108814	-0.0691412	-0.481716	0.383554	-0.392379	0.696995	0.241395	-0.0430553	-0.101051	0.234486	-0.26827	-0.362347	-0.302853
PTM_GAMMA_CARBOXYLATION_HYPUSINE_FORMATION_AND_ARYLSULFATASE_ACTIVATION	0.257413	0.0263186	-0.380557	-0.111026	-0.154817	0.268348	-0.190968	0.347864	0.317044	-0.157727	-0.0192834	-0.051174	-0.140246	0.0159118	-0.29245	0.301083	0.0491677	-0.178038	0.145359	0.214576	-0.212142	0.0916561	-0.153679	-0.0827055	0.457698	-0.00522637	-0.37153	0.386002	-0.365745	0.0158311	-0.285536	-0.291017	-0.419709	-0.213498	0.27414	0.0557481	-0.310086	-0.0341515	-0.120513	0.229439	-0.12313	-0.173272	0.179448	0.413388	-0.285079	0.262662	-0.0290277	-0.277371	-0.399861
APOPTOTIC_CLEAVAGE_OF_CELLULAR_PROTEINS	0.309669	0.113429	0.246709	0.217246	0.154686	-0.265122	-0.0158007	-0.293648	0.0544478	0.128468	-0.266451	-0.115887	-0.0611863	-0.230257	-0.202846	-0.284406	0.427261	-0.201859	0.0129392	0.157008	0.178629	0.0561531	-0.0415045	-0.1732	0.168331	-0.186227	0.363066	0.220834	-0.0425991	-0.00430224	0.419851	-0.0585722	-0.303876	0.166301	-0.37949	-0.36628	0.289662	-0.158197	-0.387003	0.0136124	-0.360009	-0.0218267	0.167558	-0.10486	0.206966	0.334641	-0.0140114	-0.29475	0.0872779
RNA_POL_I_TRANSCRIPTION_TERMINATION	-0.237748	-0.0694428	0.329031	-0.401618	-0.58297	0.177628	0.0753239	0.56835	-0.25021	-0.520759	-0.292482	-0.168536	-0.673462	-0.308689	0.017648	0.100929	-0.190874	-0.321323	-0.199396	0.311452	0.158854	-0.433319	-0.171062	0.300539	-0.290945	-0.0438982	0.0488904	-0.331249	0.300922	-0.13182	0.345556	-0.210173	0.271803	0.0228191	0.570086	0.0731224	-0.164834	0.318603	0.666454	-0.15513	0.423996	0.452683	0.307553	0.382889	0.0733096	0.120404	-0.517139	-0.0437521	0.104974
FORMATION_OF_THE_TERNARY_COMPLEX_AND_SUBSEQUENTLY_THE_43S_COMPLEX	0.0946133	0.121268	0.353105	-0.25803	-0.389343	0.58361	0.176563	0.490535	-0.405343	-0.425886	0.0418603	0.138786	-0.458947	0.0901229	0.191824	0.545327	0.0815542	-0.00467723	-0.415462	0.363854	0.148947	-0.335655	-0.285323	-0.231287	-0.486954	0.21367	-0.115023	-0.604373	-0.099086	-0.0945706	-0.095717	0.265036	0.0853779	-0.28146	0.480846	0.438501	-0.150813	0.0425668	0.49234	0.0828722	0.612744	0.39826	0.177846	0.154002	-0.120463	0.236392	-0.565932	-0.253738	-0.183683
ACTIVATION_OF_THE_PRE_REPLICATIVE_COMPLEX	-0.325971	0.0313984	0.170221	-0.136293	-0.188169	0.376894	-0.120136	0.322885	-0.607904	-0.184057	-0.0585005	0.166051	0.249717	0.316996	0.166366	0.158296	-0.221536	0.169448	0.337751	0.540609	0.3245	0.0307669	0.148732	0.190956	-0.492702	-0.0566128	0.154074	-0.436099	0.339663	0.185229	0.173315	0.0528432	0.257111	0.335961	-0.16723	0.378858	0.252542	0.331257	0.553318	-0.646296	-0.364159	-0.296868	0.0659911	-0.676331	0.0462507	-0.198499	-0.511878	0.417681	0.0590804
PROCESSING_OF_INTRONLESS_PRE_MRNAS	-0.298166	-0.309529	0.405389	-0.099336	-0.499586	-0.084633	-0.283658	-0.0128472	-0.565334	-0.2855	-0.439565	0.26377	-0.0600734	-0.202555	-0.339908	-0.549938	-0.40349	0.285746	0.293924	0.0946103	-0.499821	0.207338	0.0551441	-0.358371	-0.500412	0.113275	0.465865	-0.558326	0.0440316	0.353334	0.280569	0.554789	0.253815	-0.059743	0.476525	0.645349	0.400443	0.320869	0.257398	-0.533028	0.269718	0.468442	-0.153488	-0.222521	0.456011	0.346188	-0.245191	0.369377	0.0755996
GAP_JUNCTION_DEGRADATION	-0.204646	0.169632	-0.0290107	0.687971	0.318796	0.380785	0.23283	-0.301137	-0.101016	0.0777467	-0.283493	0.289868	0.147685	0.359897	0.40846	0.302804	0.288697	-0.104146	-0.134217	-0.282663	0.0948447	0.0382442	-0.110341	-0.17312	-0.283985	0.517726	0.317144	-0.0075596	-0.23376	-0.37693	-0.040962	0.289568	0.072662	-0.28815	-0.0445206	0.000123317	-0.353254	0.495207	-0.401758	-0.0803387	-0.170578	-0.411473	0.0987752	-0.468322	-0.503241	0.140859	-0.0325622	-0.358555	-0.168174
BASE_EXCISION_REPAIR	0.212436	-0.15738	0.202778	0.00245806	-0.102784	0.177761	-0.109072	-0.114512	-0.287612	0.34152	0.0645126	0.321118	-0.0203522	0.249222	0.08065	-0.375055	-0.435395	0.168437	0.623673	0.363833	-0.0510415	0.0807613	0.0378706	0.228608	-0.0946917	-0.021431	-0.248746	-0.208516	0.0656858	-0.0324968	0.433847	-0.246285	-0.209805	0.173179	-0.572006	0.144874	0.282483	0.348392	0.233283	-0.144769	-0.230507	0.0226893	-0.174883	-0.411157	0.155155	-0.421397	-0.619118	0.0313122	0.414554
BILE_ACID_AND_BILE_SALT_METABOLISM	0.215212	0.064794	-0.00326218	-0.0157868	0.108573	0.223506	-0.219724	0.102504	0.361934	-0.102562	0.146037	-0.275475	0.0522618	0.1274	-0.0460723	-0.0695142	0.297517	-0.222504	-0.194509	0.0911004	-0.33935	0.335892	0.17427	0.0758423	0.461089	-0.288362	-0.0568429	0.131764	-0.146533	-0.142088	0.244943	-0.405591	-0.347411	0.239026	0.0264037	-0.35729	-0.0740009	0.163079	-0.130227	-0.242302	-0.204364	-0.0357684	-0.257017	0.0710314	-0.194807	0.0360472	0.152918	-0.156411	0.0933453
SYNTHESIS_OF_BILE_ACIDS_AND_BILE_SALTS_VIA_7ALPHA_HYDROXYCHOLESTEROL	0.334748	0.267598	-0.169159	0.0140429	0.015654	0.0180438	-0.357283	0.0294164	0.417956	0.167042	0.028574	-0.308232	0.135293	0.351708	0.156268	-0.0476804	0.33957	-0.42351	-0.122278	-0.0662429	-0.398727	0.288494	-0.0777711	0.0319578	0.478366	-0.289415	-0.28692	-0.0533651	-0.208936	-0.506868	0.105547	-0.468822	-0.399391	0.349568	-0.197014	-0.511326	0.210519	0.170104	0.0100248	-0.194325	-0.131049	0.0420303	-0.215922	0.19705	-0.0956081	-0.0228963	0.21261	-0.213273	0.110136
RECYCLING_OF_BILE_ACIDS_AND_SALTS	0.100289	0.092151	0.419676	0.145411	-0.27607	0.207935	-0.139193	0.0937563	0.194578	-0.149637	-0.0936567	-0.195033	-0.391382	-0.129113	-0.050066	0.0110148	0.0285905	0.236471	-0.406289	0.314567	-0.14552	0.484476	0.524767	0.169848	0.409439	-0.250014	-0.225756	0.0808582	0.230636	0.217897	0.261951	-0.357352	-0.159661	-0.114469	0.0374616	-0.120505	-0.561775	0.231722	0.119382	-0.311667	-0.0851946	-0.178381	-0.332849	0.119483	-0.0581783	-0.128297	-0.197831	0.0754665	0.114958
SIGNALING_BY_RHO_GTPASES	-0.1162	0.18291	0.0943636	0.0655851	-0.11862	-0.173627	-0.0797917	-0.0537364	-0.135203	0.180869	-0.0268676	0.0162513	-0.0323422	0.00996556	-0.147286	0.130224	0.12091	0.0513443	-0.155667	0.0541815	0.0878697	-0.0396387	0.0500139	-0.0190261	-0.283309	-0.12417	0.0633836	0.287025	-0.177846	0.00749247	0.125922	-0.0244987	0.0881331	-0.0796567	0.00668262	-0.0144342	0.0302894	0.150302	0.0512893	-0.0439543	0.189365	0.0224417	0.00803844	-0.0141321	-0.209517	-0.0119042	-0.0634738	0.234648	0.00126779
SIGNALING_BY_WNT	-0.325078	0.281697	0.0404213	-0.200421	-0.340008	0.0757394	0.24655	-0.0405174	0.146851	-0.239142	-0.421838	0.15541	-0.412903	0.280553	-0.0525888	-0.134842	0.144483	-0.0833049	0.0546087	-0.0786076	0.0178449	-0.111681	0.288418	-0.436485	0.114166	0.0781958	0.0469683	-0.173248	-0.203915	0.154034	0.231978	-0.28979	0.353646	-0.0214418	0.0823983	0.0859486	0.0987667	-0.235093	0.046613	0.134359	-0.0441795	0.10489	0.117357	-0.044229	-0.0881869	-0.0903884	-0.193995	0.00819635	0.40506
METABOLISM_OF_NON_CODING_RNA	-0.43703	0.251746	0.0810675	-0.422	-0.408498	0.271403	0.173204	0.208717	-0.351847	-0.429487	-0.169658	0.28148	-0.341695	0.0583957	0.368263	0.0127799	0.0566608	-0.144713	-0.19361	0.25878	-0.22925	-0.336981	-0.0626139	-0.222715	-0.396337	-0.385638	0.400715	-0.414416	0.228379	0.147337	0.480355	-0.206789	0.119213	-0.189361	0.409521	0.361298	0.274469	0.40172	0.530167	-0.292653	0.119247	0.392688	0.106432	-0.213511	0.134765	0.131902	-0.434291	0.257582	0.0501653
SYNTHESIS_OF_BILE_ACIDS_AND_BILE_SALTS_VIA_24_HYDROXYCHOLESTEROL	0.0797065	0.24564	-0.177663	0.207375	0.200462	0.414645	-0.438672	-0.0759285	0.034969	0.0439279	0.229626	-0.519023	0.425524	0.265241	0.1611	0.146748	0.410985	-0.436075	-0.250006	-0.0462812	-0.666231	0.218449	0.141749	0.0539995	0.558188	0.137795	-0.222563	-0.359295	-0.174582	-0.247792	0.204903	-0.345042	-0.27097	0.428111	-0.0823319	-0.311574	0.191909	-0.27196	-0.439038	-0.278275	-0.10758	-0.0749992	-0.0298708	0.269428	-0.155403	0.518419	0.352692	-0.381894	0.331355
SYNTHESIS_OF_BILE_ACIDS_AND_BILE_SALTS	0.265417	0.164137	-0.10103	-0.0163846	0.18858	0.161462	-0.266166	0.168227	0.395946	0.0724019	0.154752	-0.300407	0.120025	0.232213	0.0264021	0.0140782	0.341091	-0.391535	-0.179813	-0.0170811	-0.418587	0.215917	-0.127579	-0.0359368	0.455264	-0.266109	-0.123999	0.0157229	-0.271127	-0.361338	0.240503	-0.393018	-0.389515	0.346142	0.031833	-0.404036	0.163234	0.102598	-0.209817	-0.078045	-0.178363	0.06301	-0.125502	0.0455668	-0.203684	0.0574614	0.254025	-0.30121	0.0470304
METABOLISM_OF_STEROID_HORMONES_AND_VITAMINS_A_AND_D	0.345463	-0.144219	0.193077	-0.0126309	0.0776697	-0.0987765	0.0255482	-0.0584315	0.274966	0.0798871	-0.00483228	-0.176067	-0.217288	0.0895057	-0.0362263	0.0550294	0.0686676	0.0860824	-0.183766	0.196778	0.0963314	-0.101747	0.0129223	-0.0582033	0.37927	-0.176851	-0.213582	0.369208	0.0492886	-0.30713	-0.212014	0.0090862	-0.117045	-0.0925626	0.147887	-0.00923416	-0.0201011	0.0874669	-0.19638	-0.22712	-0.261071	-0.0735836	0.000331912	-0.0376359	0.176266	-0.0235363	-0.00476666	0.165473	-0.0724147
ANDROGEN_BIOSYNTHESIS	0.409323	-0.0590057	0.518257	0.299579	0.0988538	0.196448	-0.012099	0.247597	0.361243	-0.143205	-0.339086	-0.161866	-0.206295	0.0715907	0.121669	0.0332984	-0.114807	-0.303192	0.439116	-0.157343	0.400663	0.0644343	0.0300934	-0.104931	0.193261	0.110841	-0.118552	0.121676	-0.0727197	-0.583719	-0.362995	0.100763	0.0525706	-0.174485	0.325876	0.271366	-0.329833	-0.0115936	-0.527011	-0.253951	0.208674	0.483311	0.170401	0.34427	0.26742	0.274735	-0.0832905	0.0545889	-0.023307
SIGNALLING_BY_NGF	0.0118133	0.0675605	0.00463607	0.133724	0.0513551	-0.0457885	-0.0346851	-0.073465	-0.102383	0.109462	0.0805031	0.0395394	0.138898	0.0839551	0.0594844	-0.0310792	-0.0293828	-0.0359383	0.139217	-0.160889	0.082	0.015778	-0.00617406	0.0631965	-0.101356	0.0970051	0.0988391	0.0186468	-0.0871248	-0.142134	0.129939	0.0645214	0.0236318	0.0126036	0.0976186	-0.0426785	-0.000426664	-0.0587867	-0.11594	-0.129276	0.0494044	-0.152271	-0.0973143	-1.24e-05	-0.0283918	-0.158185	-0.0768811	0.0953662	0.0718434
CTNNB1_PHOSPHORYLATION_CASCADE	-0.100039	0.284862	0.0614109	0.188492	-0.109779	0.304251	0.384214	0.125283	-0.29468	-0.0361854	-0.367241	0.103914	-0.348332	0.0154656	-0.00462725	-0.0961461	0.0521745	0.341571	0.212311	0.00190381	0.0776144	-0.141914	0.274238	-0.114831	-0.109505	0.374527	-0.0380146	-0.192865	-0.505174	0.240622	-0.327957	0.108806	-0.387859	0.0870088	0.159525	0.21931	-0.22752	0.0393321	-0.162518	0.173112	0.0534956	0.142576	0.157942	0.0567066	-0.406527	-0.0211599	-0.381557	-0.268146	0.49134
INSULIN_RECEPTOR_RECYCLING	0.37659	-0.243452	-0.246664	0.0923775	-0.0407524	-0.371013	0.00930833	-0.435861	0.428608	0.285478	0.20001	-0.288209	0.162779	-0.359057	0.0255553	-0.337111	-0.0959898	0.13113	0.196647	-0.270476	-0.153341	0.400372	-0.383185	0.0983641	0.530038	0.260155	0.0754659	0.213922	0.00939749	0.300727	-0.25203	0.0719298	0.168997	-0.139356	0.145756	-0.45823	-0.292533	-0.12795	-0.477721	-0.0922546	-0.638099	-0.471976	0.344747	0.352251	0.227321	0.103073	0.0916962	-0.332864	0.304864
COPI_MEDIATED_TRANSPORT	-0.211405	0.569488	0.191168	0.0634835	-0.179518	-0.18595	0.160983	-0.509103	0.714315	0.333437	0.613915	-0.354864	-0.304387	-0.0512617	-0.110351	-0.0605112	-0.381622	-0.0969586	0.338872	-0.624548	-0.388585	0.162043	-0.239087	0.32961	0.48926	-0.0994643	0.124357	0.175125	-0.51193	-0.31841	0.00285286	-0.301929	-0.456215	-0.633684	0.594831	-0.281697	-0.306507	-0.277316	0.096283	-0.243657	-0.360559	0.404355	0.434289	0.0264975	0.0913532	-0.353408	-0.103463	-0.645058	-0.134399
NEF_MEDIATED_DOWNREGULATION_OF_MHC_CLASS_I_COMPLEX_CELL_SURFACE_EXPRESSION	0.285636	0.0982953	0.275488	0.508333	0.250438	0.0668807	0.0629273	0.182093	0.297663	0.188084	-0.0720808	-0.427497	0.383687	0.313223	-0.0618594	-0.077736	-0.277032	-0.152557	0.381675	-0.0601169	0.290558	0.364675	-0.0130848	-0.0175325	0.0299754	0.23119	-0.171545	0.244214	-0.227674	-0.379401	-0.500853	-0.319301	-0.0375575	-0.326128	0.195384	-0.0813793	0.0346737	-0.119801	-0.554051	-0.279193	-0.356429	-0.0905038	-0.123205	0.00224518	-0.172833	-0.384038	0.463607	-0.344634	0.186866
SIGNALING_BY_SCF_KIT	-0.0408512	0.253539	0.0409026	0.167909	0.32061	-0.245179	-0.114198	-0.224389	-0.0772322	0.302041	0.275895	-0.0545157	0.300016	-0.0106019	0.172072	-0.36621	-0.0882888	-0.032641	0.0771724	-0.122364	-0.153213	0.0981573	0.234953	0.0505006	-0.0817113	0.229792	0.0539676	-0.165812	-0.177645	-0.209227	0.0599308	0.1632	-0.14629	0.0584173	0.0694873	-0.202046	0.00935275	0.0449617	-0.284839	-0.0742482	-0.0843852	-0.0900289	-0.153257	0.0300951	0.14783	-0.113979	-0.211962	-0.163357	0.227427
DEVELOPMENTAL_BIOLOGY	-0.0607475	0.18289	0.0428084	0.0914084	0.0224957	-0.0414878	0.0149114	-0.0641308	-0.0298266	0.104459	0.0214219	0.100198	-0.00304557	0.0414956	0.036531	-0.172697	0.0363735	0.00209155	0.109829	-0.0413252	0.165941	0.115068	0.0409026	0.0304538	-0.0167139	0.172744	0.0499743	0.095999	-0.142172	0.0172364	-0.0382118	0.13686	-0.0568225	0.0982331	0.0963127	0.0482105	0.0231072	-0.0622508	-0.0895256	-0.0906302	0.0252485	-0.108241	-0.104391	-0.0237814	-0.0687926	-0.101924	-0.161745	0.0460438	-0.0713871
CROSS_PRESENTATION_OF_SOLUBLE_EXOGENOUS_ANTIGENS_ENDOSOMES	-0.306147	0.337576	0.00906692	-0.312121	-0.404596	-0.112469	0.230734	-0.119866	0.325313	-0.18597	-0.53207	0.125135	-0.447205	0.315568	-0.101199	-0.183822	0.194587	-0.332953	-0.00940551	-0.0917625	-0.0176981	-0.136706	0.29669	-0.534256	0.315827	-0.152652	0.00186885	-0.0788265	-0.110405	0.0857288	0.397844	-0.487389	0.498292	-1.19e-05	0.0250413	0.10581	0.216669	-0.313136	-0.0919789	0.198666	-0.213889	0.0685723	0.136866	-0.126147	0.0481187	-0.153558	-0.0115619	0.0761293	0.398984
SIGNALING_BY_NODAL	0.187723	0.433707	0.171325	-0.0172554	0.111624	-0.104838	-0.27571	-0.0856752	-0.167415	-0.000778312	0.0457462	0.355589	-0.442931	-0.085802	0.118437	-0.100777	-0.0523845	0.104172	0.0123299	-0.0394556	0.0757625	0.215368	-0.00212146	0.346229	-0.203444	0.419574	-0.0616128	-0.371499	0.25772	0.321862	-0.376832	0.099463	-0.316205	-0.0317274	-0.0564331	-0.0557616	0.0284179	0.298945	0.0668448	-0.174003	0.279874	0.00638748	-0.116807	0.317282	-0.0428648	0.250313	-0.403817	-0.348592	-0.21819
DAG_AND_IP3_SIGNALING	-0.101758	-0.199826	-0.092665	0.091678	0.038775	-0.0894664	-0.152248	0.176444	-0.276454	0.162082	-0.134158	0.160717	0.213172	0.22811	-0.0718708	-0.0321489	0.16004	0.199725	0.0373292	-0.205961	-0.0741055	-0.164503	-0.112384	0.390105	-0.120827	-0.0199966	-0.0619529	-0.012146	0.121136	-0.0829116	0.187457	0.249851	-0.0833728	0.274174	0.00179203	-0.00790844	0.113564	0.00047571	0.103379	-0.408833	0.0140031	-0.192508	-0.0778204	-0.100641	-0.285813	-0.262385	0.152022	0.403436	0.0570323
SPRY_REGULATION_OF_FGF_SIGNALING	-0.110327	0.322478	0.046971	-0.218046	0.267141	0.281625	-0.0706301	-0.321726	-0.448401	0.269678	0.170674	0.184528	0.154984	0.241011	0.205023	-0.349577	-0.197268	-0.119308	0.263521	0.0739863	0.0910408	-0.0603734	0.498051	-0.16028	-0.202931	0.209459	0.242547	0.0642191	-0.171253	0.127801	0.464907	0.379036	0.069315	-0.227021	0.241584	0.374012	-0.233964	-0.162944	0.0548304	0.0723895	0.124347	0.143489	0.299777	-0.24342	-0.142312	-0.45974	-0.50371	-0.23123	-0.501956
TCA_CYCLE_AND_RESPIRATORY_ELECTRON_TRANSPORT	-0.0308328	-0.00778699	-0.07069	-0.256978	0.0302975	0.187616	0.204943	0.25663	0.384674	-0.146397	-0.380554	-0.265599	-0.318918	0.207953	0.00510866	0.476362	0.343319	-0.0131587	-0.216004	-0.123459	0.106595	0.02172	-0.0702834	-0.205187	0.411975	-0.363521	-0.263266	-0.235886	-0.0393519	-0.173673	0.109131	-0.267471	0.0975394	-0.199537	-0.18113	0.111649	0.319532	0.258356	0.127854	-0.347445	0.109236	-0.189423	0.0256603	-0.157692	-0.258621	0.0278567	0.225116	0.132127	0.318694
BMAL1_CLOCK_NPAS2_ACTIVATES_CIRCADIAN_EXPRESSION	0.00252727	-0.301484	0.177483	0.321274	0.250282	0.152202	-0.0818947	-0.059443	-0.102578	0.0999841	-0.0188603	-0.0995835	0.382763	-0.138256	-0.267345	-0.0136083	0.054977	0.295373	-0.253889	-0.114096	0.347631	0.162087	0.247949	-0.224076	-0.193225	0.107771	0.142419	0.272772	-0.265096	-0.310488	0.170242	0.183488	-0.240644	-0.0813053	0.193068	0.193171	-0.132178	-0.318123	-0.261621	-0.176168	-0.0967983	-0.142502	-0.0882756	0.366029	-0.130122	-0.15176	0.0122371	-0.153461	0.208521
ANTIGEN_PROCESSING_CROSS_PRESENTATION	-0.0156581	0.120007	0.00962652	-0.115274	0.00589181	-0.112594	0.267461	-0.106412	0.504468	-0.114246	-0.314019	-0.112619	-0.380643	0.233126	-0.309819	-0.013928	0.288715	-0.376029	-0.0828609	-0.245468	0.0074839	-0.0788293	0.22705	-0.343767	0.392247	-0.0908516	0.108886	0.276131	-0.243201	-0.0633245	0.139253	-0.384607	0.280042	-0.137297	0.197685	0.0483359	0.133465	-0.256096	-0.196231	0.136464	-0.241387	0.141739	0.137358	0.122096	-0.0942024	-0.277296	0.119499	-0.207777	0.231784
GROWTH_HORMONE_RECEPTOR_SIGNALING	0.22055	0.321288	-0.245694	0.177902	0.0697312	-0.00113897	-0.282759	-0.228848	-0.00231603	0.370236	-0.0725314	0.0699859	0.0992407	0.000692232	-0.0065205	0.054897	0.0104998	-0.236299	0.106764	-0.0649988	-0.0222863	-0.0134993	-0.21597	0.0298387	0.48295	0.0613452	0.151998	0.0998522	-0.411471	-0.160843	-0.00786477	0.039572	0.200707	0.00919768	0.161138	0.23074	-0.0170608	-0.105677	-0.162263	-0.0727179	-0.115742	-0.256816	-0.0974489	0.367125	-0.0576258	-0.288571	-0.0769805	-0.23187	-0.207106
TRIF_MEDIATED_TLR3_SIGNALING	0.0561319	-0.0854719	-0.0475001	0.126655	0.211161	-0.110794	-0.0302564	-0.148602	0.225979	0.0757874	0.0785041	-0.0576701	0.0328562	-0.063446	0.044822	0.0745705	0.211972	-0.186518	0.0932604	0.0385447	-0.0342399	-0.0247973	0.0550885	-0.124524	0.0959151	0.0842992	0.00511387	-0.139101	-0.175186	-0.0358354	0.16413	-0.0555501	-0.0195089	-0.187906	0.144963	-0.283304	-0.242271	-0.0466751	-0.0863915	-0.000763511	-0.104694	0.0677391	-0.0667482	0.116078	-0.00767982	-0.14157	-0.0993173	-0.137809	-0.0889855
CELL_CELL_COMMUNICATION	0.162942	0.307849	0.0919526	0.160798	0.203364	-0.098858	-0.175532	-0.0877651	0.0308232	0.126755	-0.000850936	-0.0734942	0.016755	-0.0798432	-0.154663	-0.171147	0.0543126	-0.0469294	0.0917419	-0.0697232	0.119682	0.23246	0.0944339	0.221148	0.194124	0.137662	0.179145	0.15806	-0.0710401	-0.0404071	0.111536	0.07421	-0.0760737	0.0280737	-0.10508	-0.164815	-0.0097135	0.09614	-0.273651	0.103897	-0.141014	-0.256512	0.00460176	0.0786028	-0.158775	0.0412704	-0.152932	-0.082662	-0.21805
ABCA_TRANSPORTERS_IN_LIPID_HOMEOSTASIS	0.0211107	0.454216	-0.1936	-0.121519	-0.0665174	0.27828	-0.304508	0.392663	0.28034	0.00263324	-0.305408	-0.120348	0.119574	0.335555	-0.414423	0.300691	-0.101473	-0.0882021	-0.456688	-0.0148179	0.201488	0.13353	-0.378898	-0.071278	0.38127	-0.324106	-0.242532	-0.243441	0.111187	-0.0427382	-0.135392	0.00148283	-0.0225083	-0.336124	-0.115471	0.396313	0.255197	0.305079	0.103332	0.102844	-0.0825496	0.167442	0.139471	0.144246	0.377053	0.111222	-0.201641	-0.153462	0.133484
ENDOSOMAL_VACUOLAR_PATHWAY	0.730009	-0.598328	-0.10998	0.514406	0.714403	0.0644937	0.00578938	0.330539	0.825913	0.638452	-0.484457	-0.798803	-0.131214	-0.132232	-0.667818	0.593448	0.712102	-0.611082	-0.249576	-0.604416	-0.123328	-0.256647	-0.0985043	-0.352049	0.592358	0.065999	0.463335	0.734409	-0.639523	-0.542888	-0.273607	-0.075438	-0.399805	-0.114365	-0.0270878	-0.193204	0.039632	0.0141556	-0.523983	0.576212	-0.589188	-0.0298153	0.266652	0.312878	-0.379269	-0.617064	0.749288	-0.546901	-0.179336
TETRAHYDROBIOPTERIN_BH4_SYNTHESIS_RECYCLING_SALVAGE_AND_REGULATION	0.0688879	0.104794	0.467085	0.456388	0.570866	0.293981	-0.626896	-0.368818	0.19632	0.453387	-0.280414	-0.133674	0.501425	-0.264101	-0.433245	-0.20323	0.108993	-0.0298658	0.0494204	0.0184708	-0.291351	0.57198	0.608222	0.275516	0.362399	0.0191373	-0.49801	-0.200091	-0.0956396	0.494937	-0.231373	0.266954	-0.02681	0.461176	-0.207032	-0.468146	0.23612	-0.0866214	-0.452959	-0.507046	-0.45331	-0.424009	-0.0976451	-0.112749	-0.0912118	-0.572009	0.355866	0.33948	0.0795309
ER_PHAGOSOME_PATHWAY	-0.120955	0.258494	0.00998261	-0.158371	-0.00431017	-0.119589	0.254101	-0.183838	0.487058	-0.116682	-0.339459	-0.084325	-0.403449	0.271868	-0.217065	0.0130089	0.235271	-0.322173	0.0204611	-0.263752	-0.0949363	-0.0428854	0.333609	-0.409397	0.402275	-0.0137182	0.145886	0.203947	-0.303606	-0.0935075	0.183039	-0.394983	0.330317	-0.104423	0.16939	0.0338371	0.218416	-0.295492	-0.162517	0.0830211	-0.196464	0.0618828	0.0202127	0.112206	-0.103427	-0.289583	0.174972	-0.165926	0.234761
MEIOSIS	0.211063	-0.0219164	0.163718	0.367194	-0.0250042	-0.0552934	-0.193764	0.0739945	-0.472087	-0.101891	0.0946354	0.22177	0.359743	0.0191894	0.0444002	0.0489726	-0.0688897	0.208892	-0.130464	0.343613	0.086017	0.26058	0.359884	0.0610702	-0.365583	-0.0417606	-0.0200919	-0.224268	0.259875	-0.0183106	-0.164966	0.0307234	0.269309	-0.212208	-0.10096	0.00176655	-0.111583	0.266299	-0.177009	-0.306978	-0.382667	-0.14483	-0.151072	-0.334911	0.348602	-0.203199	0.0032956	0.185939	0.00290367
NEGATIVE_REGULATION_OF_FGFR_SIGNALING	-0.0675606	0.102725	0.0812532	0.0641755	0.269572	0.0905803	0.0908476	-0.100402	-0.000665128	0.0362111	0.0962853	0.0823411	0.200249	-0.0354398	0.00987904	-0.0274372	0.0112386	-0.323474	0.162892	-0.0572112	0.0779878	-0.103107	0.303985	-0.145521	0.203832	0.0863211	0.0603148	0.0689249	-0.231503	-0.168129	0.242912	0.164616	-0.0539568	-0.242893	0.288466	0.315418	-0.147206	-0.180193	-0.11706	0.216872	0.239813	0.222561	0.221792	-0.130026	-0.228578	-0.0115913	-0.165599	-0.0752238	-0.252532
G0_AND_EARLY_G1	-0.186064	-0.388448	0.342588	0.556823	0.205818	0.223178	-0.304296	-0.223341	-0.576585	-0.250094	-0.173731	0.20655	0.297509	0.354209	0.094745	-0.27105	0.22517	0.132528	0.172763	0.509962	-0.0161855	0.0463761	0.429857	0.127178	-0.465704	0.198413	0.209953	-0.228076	0.152104	0.0621817	0.0206546	0.153905	0.0139615	0.401199	-0.255213	-0.145345	-0.0284229	0.0128974	-0.19042	-0.552504	0.174518	-0.0103022	-0.267082	-0.671984	0.521901	-0.0772382	-0.117461	-0.0666573	0.439
REGULATION_OF_KIT_SIGNALING	0.0537317	0.538105	0.0328783	-0.0452013	0.392585	-0.26369	-0.363049	-0.254198	0.111465	0.44359	0.329623	0.0244111	0.337044	-0.231392	0.230443	-0.523557	-0.129694	-0.106077	-0.029501	0.0335244	-0.407308	0.247124	0.2822	0.496825	-0.0935135	0.203164	0.157049	-0.160761	0.0571382	0.0651054	0.0934238	0.00893308	-0.342474	0.286199	-0.265377	0.10988	0.000797994	-0.11107	-0.458328	-0.0876211	-0.157072	0.124435	0.195728	-0.259884	-0.151066	0.100957	-0.230976	-0.36575	0.094874
MEMBRANE_TRAFFICKING	-0.0482839	0.0394844	-0.0672881	0.0614187	0.101694	-0.101564	0.0570974	-0.158961	0.410652	-0.00414484	0.208584	-0.206943	0.111226	-0.241558	0.0794424	-0.122134	-0.0226714	-0.112874	-0.0139317	-0.103384	-0.188337	0.18811	0.0283535	0.0494412	0.173557	0.0499535	0.106742	0.0588558	-0.201131	-0.188895	0.028743	-0.173552	-0.128908	-0.119163	0.247749	-0.226669	-0.0571344	-0.0438728	-0.0679099	0.0839518	-0.176898	-0.0193679	0.107948	-0.141798	0.0616095	-0.122548	0.0137266	-0.230357	0.0876099
NEF_MEDIATES_DOWN_MODULATION_OF_CELL_SURFACE_RECEPTORS_BY_RECRUITING_THEM_TO_CLATHRIN_ADAPTERS	0.0927542	0.191587	0.142215	0.366084	0.17229	-0.118767	-0.0854637	-0.0302905	0.348846	0.164167	0.144865	-0.166317	0.136716	0.311052	0.0781934	-0.197933	-0.227774	-0.100245	0.302908	-0.0572858	0.234806	0.261669	-0.0571455	0.213523	0.183286	0.165903	-0.206356	0.247775	-0.209492	0.0699123	-0.206962	-0.119572	-0.241022	-0.472725	0.0424862	-0.178339	-0.0146582	-0.0681048	-0.404465	-0.242784	-0.127114	-0.0469175	-0.0733817	-0.209872	-0.179714	-0.252264	0.320597	-0.268266	0.0383736
IMMUNOREGULATORY_INTERACTIONS_BETWEEN_A_LYMPHOID_AND_A_NON_LYMPHOID_CELL	0.326493	-0.023535	0.0886822	0.0488016	0.113934	-0.0761381	-0.164202	0.266086	0.432852	-0.103791	-0.0209102	-0.391112	-0.271904	-0.293439	-0.202428	-0.0404368	0.00536839	-0.17461	-0.0576597	-0.226753	0.0943131	-0.0845759	-0.0677096	0.10607	0.166682	-0.0834582	0.286547	0.158353	-0.252788	-0.185805	0.168371	0.0323466	-0.357245	-0.106275	-0.0358916	-0.177575	0.181961	-0.156306	-0.251098	0.236473	0.00303964	0.364122	0.130029	0.368259	-0.0149317	-0.299454	-0.00332145	-0.120399	-0.217011
ACTIVATED_AMPK_STIMULATES_FATTY_ACID_OXIDATION_IN_MUSCLE	0.127125	-0.00878625	0.0102168	-0.0602307	0.351128	-0.507905	0.401952	0.00214634	-0.056287	0.256128	-0.0977143	-0.0403616	0.301083	-0.0338984	-0.476206	-0.00356076	0.277566	-0.462933	-0.1832	-0.446515	0.329942	-0.123404	-0.346801	-0.393344	0.267962	-0.127184	-0.273861	0.151113	-0.187935	-0.281069	0.10751	-0.352528	0.311956	-0.118313	0.04826	-0.402568	0.263829	-0.403788	-0.131855	0.327682	0.0939738	0.120967	0.192246	0.307158	-0.365693	0.104391	-0.142307	-0.1286	0.0234314
VITAMIN_B5_PANTOTHENATE_METABOLISM	-0.255209	-0.592065	0.115735	-0.0230676	-0.256077	0.194548	-0.0548007	-0.323559	0.313417	-0.423338	-0.424784	0.0782541	0.297938	0.302115	0.385269	0.392054	-0.00531864	-0.105373	-0.0271886	0.0216217	-0.20734	-0.167181	-0.00116401	0.205079	0.0510038	-0.479001	-0.453336	0.158292	-0.366478	0.106129	0.353168	-0.437003	0.0703259	-0.525275	0.168782	-0.237356	0.348284	0.280693	0.239617	0.129791	0.0299718	0.338444	0.126832	-0.662477	0.13452	-0.0760313	0.0905747	-0.207346	-0.242801
BOTULINUM_NEUROTOXICITY	-0.0546101	0.317145	-0.0685712	0.22891	0.0952229	-0.0117792	-0.125866	-0.258729	0.392538	0.296768	0.351203	0.186131	0.153103	0.012449	-0.215604	-0.238558	-0.275277	-0.146485	0.296191	-0.10359	0.201551	0.285079	-0.251207	0.437002	-0.114158	0.458868	-0.0641137	0.101243	-0.115436	-0.397542	-0.490146	0.097717	-0.128282	0.215426	0.0653477	-0.108017	-0.330406	-0.274796	0.0320509	0.0987935	0.157559	-0.447446	-0.228332	0.0100799	-0.220558	-0.333915	0.121891	-0.414963	0.332747
METABOLISM_OF_VITAMINS_AND_COFACTORS	0.128402	-0.094383	-0.102819	-0.32185	-0.131822	0.111193	-0.129127	0.0241259	0.316471	-0.228468	-0.147377	-0.144349	0.0276395	0.129817	0.102615	0.226661	-0.05184	-0.235587	-0.0871338	0.0388739	0.00184932	-0.0851008	-0.207579	-0.0780783	0.368404	-0.465975	-0.243601	0.127209	-0.298249	-0.202803	0.207424	-0.333656	-0.109215	-0.343123	-0.0965116	0.12586	0.161167	0.134351	0.238905	0.0284283	0.114162	0.244827	0.153357	-0.112726	0.146256	-0.0788042	-0.0494763	-0.113475	0.0122633
TRANS_GOLGI_NETWORK_VESICLE_BUDDING	0.0992099	0.177566	-0.223963	0.121453	0.177402	-0.110401	-0.0415749	-0.0517663	0.445728	0.0562934	0.172216	-0.313151	0.240818	-0.149684	-0.102989	-0.0847734	-0.0538471	-0.0700995	-0.0609286	-0.04436	-0.124282	-0.0331877	0.211094	0.150505	0.222714	0.032678	0.0930271	0.151794	-0.348453	-0.277434	-0.00709829	-0.0871337	-0.277452	-0.157191	0.242331	-0.276446	-0.0131473	0.0135574	-0.119823	-0.0200684	-0.346974	-0.199134	-0.0220962	-0.248982	0.19287	-0.1718	0.102238	-0.179893	0.117127
PROTEOLYTIC_CLEAVAGE_OF_SNARE_COMPLEX_PROTEINS	-0.167761	0.341209	-0.00668328	0.179579	-0.0476211	-0.0932181	-0.0202754	-0.266495	0.439756	0.28293	0.308247	0.122395	0.251781	0.0223215	-0.326983	-0.27236	-0.074929	-0.148094	0.272598	-0.0804197	0.179236	0.304703	-0.332501	0.39842	-0.0612743	0.485732	-0.0152432	0.267147	-0.187062	-0.423818	-0.444339	-0.0738645	-0.169373	0.25088	-0.0748213	-0.120736	-0.16491	-0.280177	-0.0980831	0.239711	0.0245976	-0.401978	-0.16099	0.130825	-0.246475	-0.208629	0.243297	-0.44466	0.383487
RESOLUTION_OF_AP_SITES_VIA_THE_MULTIPLE_NUCLEOTIDE_PATCH_REPLACEMENT_PATHWAY	0.362844	-0.171226	0.267146	-0.0240499	-0.0643009	0.134254	-0.120667	-0.124529	-0.238554	0.362118	-0.00583234	0.27039	-0.11112	0.171203	0.0160451	-0.329779	-0.396916	0.176161	0.631736	0.341615	-0.0383348	0.0879463	0.0435049	0.171729	0.0731352	0.032804	-0.267192	-0.167593	0.0642126	-0.138874	0.401287	-0.264964	-0.199785	0.319302	-0.528172	0.270074	0.123861	0.231484	0.0304726	-0.0820067	-0.300337	0.00148542	-0.236753	-0.337227	0.287241	-0.401277	-0.623009	0.0359021	0.441178
GAMMA_CARBOXYLATION_TRANSPORT_AND_AMINO_TERMINAL_CLEAVAGE_OF_PROTEINS	0.505987	-0.428086	-0.205937	-0.204476	-0.455371	0.303974	-0.310002	0.00582779	0.544733	-0.267434	0.192159	-0.352337	-0.199974	-0.565678	-0.526076	-0.138722	-0.221887	-0.260334	0.191562	-0.0447144	-0.333375	0.438983	-0.149466	0.408478	0.671741	-0.0538772	0.0233764	0.451287	-0.357816	0.572154	-0.442622	-0.132883	-0.157259	0.0471112	-0.0700531	0.00214842	0.128393	0.0334067	-0.359197	-0.0528165	-0.238796	-0.190074	0.513259	0.689433	0.125388	-0.22971	-0.275849	-0.52366	-0.246413
IL_7_SIGNALING	-0.141187	0.103477	-0.102709	-0.105713	0.225209	-0.639046	0.442299	-0.114981	0.0952456	0.479797	-0.423676	-0.04337	-0.14417	0.244032	-0.345413	0.397435	-0.237254	-0.325526	0.111416	-0.119369	0.382264	-0.0692593	0.204813	-0.445722	0.0304684	0.171932	-0.29456	0.523091	-0.470439	-0.269985	0.587453	-0.105045	0.0858035	-0.251717	0.409159	-0.00328112	0.417615	0.276007	0.0556271	0.1738	-0.0451945	-0.325925	0.104295	0.0879676	-0.355361	-0.0662417	-0.341125	0.139077	-0.318611
CELL_CYCLE	-0.233431	0.0582491	0.158983	0.23836	-0.0625473	0.101023	-0.0888955	-0.148418	-0.368081	-0.187744	-0.288121	0.264732	0.23594	0.26844	-0.00264469	-0.0745101	0.0196264	0.185139	0.120104	0.280503	0.141777	-0.0453635	0.331388	0.030411	-0.337864	0.020059	0.144711	-0.250027	0.179671	0.162436	0.0366506	0.0348789	0.122309	0.127977	-0.26186	0.0345065	0.0645039	0.182472	0.0958765	-0.347718	-0.139759	-0.0828514	-0.116291	-0.473711	0.200272	-0.21685	-0.116551	0.0878239	0.293773
SIGNALING_BY_ERBB4	-0.18803	-0.0667861	0.0749816	0.236858	0.0460699	-0.0266058	0.0965205	-0.199103	0.0241321	-0.069644	0.0729316	0.00126947	0.116815	0.0801469	0.0459723	-0.196691	0.0264363	-0.101568	-0.0205654	-0.0722953	0.199677	0.0194169	0.0816765	0.0475089	-0.0517326	0.0525326	0.219607	-0.0321384	-0.0862322	-0.225241	-0.135007	0.0730529	0.14361	0.0593569	0.187236	-0.153441	-0.189087	0.0236184	-0.161539	0.0589566	0.107477	-0.0184761	0.0117409	0.0223219	0.108621	-0.110116	-0.0910583	-0.0660779	0.134046
ORC1_REMOVAL_FROM_CHROMATIN	-0.266842	0.283656	0.0760289	-0.281409	-0.283975	0.130106	0.00733833	0.0257982	-0.118058	-0.186634	-0.374962	0.171032	-0.233984	0.307153	-0.0868377	-0.152825	0.0490925	-0.19028	0.163871	0.281567	0.203567	-0.10838	0.312946	-0.31107	0.0126526	-0.102529	0.17903	-0.307604	-0.00895902	0.128922	0.295347	-0.289744	0.36831	0.109844	0.137604	0.260238	0.174039	-0.172489	0.180357	-0.222525	-0.173788	-0.0799353	0.0710597	-0.358376	0.113193	-0.0288156	-0.25933	0.181583	0.289532
O_LINKED_GLYCOSYLATION_OF_MUCINS	0.391243	0.000581615	0.184969	-0.15122	0.249997	-0.309216	-0.244837	0.146702	0.262293	0.0847684	0.0282744	-0.0816154	-0.104242	-0.189868	-0.0913365	0.0299915	0.172297	-0.0219915	-0.016243	-0.167337	-0.0863822	0.0678051	0.128193	0.0754316	0.199814	-0.0533579	-0.245822	-0.0579695	-0.124154	0.000640907	0.111923	-0.140922	0.105596	-0.0232884	0.0213011	-0.294922	0.0754199	0.0685029	-0.0413006	-0.0127459	-0.00865749	-0.199622	0.00397532	0.0946911	0.0719647	-0.156374	-0.090711	0.0724284	-0.128552
SULFUR_AMINO_ACID_METABOLISM	0.168913	0.00162974	0.14899	-0.110787	-0.137777	0.374083	-0.16314	0.389745	0.4611	-0.522184	-0.334129	0.270319	-0.128879	-0.325191	-0.00839377	0.327153	0.363391	-0.351827	-0.133099	-0.167643	-0.000535429	0.0540711	-0.246834	0.290331	0.105916	-0.288129	-0.00445368	-0.0816375	-0.409511	-0.187693	0.212632	-0.335401	-0.265324	-0.357852	-0.200368	0.0435717	-0.0755457	0.136092	0.172925	0.238453	0.378344	0.37712	0.220239	0.259632	0.0354031	-0.164004	-0.0585176	-0.330602	-0.126942
DOWNREGULATION_OF_ERBB2_ERBB3_SIGNALING	-0.112726	0.0070677	0.246778	0.0883865	-0.319972	0.239324	0.28882	0.177676	-0.0794441	-0.259238	-0.185063	0.0917618	-0.261735	0.55737	0.465717	0.324392	-0.0810254	-0.349343	-0.370868	0.0460163	-0.0712027	-0.373555	-0.163786	0.377385	-0.146164	0.254793	0.17493	-0.243341	0.190684	0.202478	-0.333772	0.100871	-0.189898	-0.227721	0.0380735	-0.0586289	-0.0821129	-0.254488	0.0529638	-0.208918	0.360381	0.505131	0.0564733	0.00129369	0.102049	0.382474	-0.129363	0.379427	-0.261605
ANTIVIRAL_MECHANISM_BY_IFN_STIMULATED_GENES	-0.0184121	0.0303838	-0.137894	-0.279895	-0.324194	0.0193964	0.195426	0.0244339	-0.215347	-0.0658323	0.0448584	0.235063	-0.332561	-0.0586575	-0.0155785	-0.083627	0.206464	-0.178411	-0.201283	0.129739	-0.179612	-0.0486624	0.073907	-0.167199	-0.232977	-0.0965405	0.37197	0.133323	0.0734208	-0.0930431	0.343391	-0.180672	0.161739	-0.214799	0.0811552	0.163501	0.108157	-0.210497	0.263646	-0.109136	-0.0578568	0.261374	0.154005	-0.282499	0.120874	-0.0372671	-0.117412	-0.0592086	-0.072039
PROLACTIN_RECEPTOR_SIGNALING	-0.382762	-0.168771	-0.209838	0.378411	-0.251462	-0.0625964	-0.251017	-0.291534	0.0827483	-0.244642	0.0901105	0.343671	0.208784	0.592584	0.0988865	-0.0829328	0.0934189	0.399485	0.0393695	0.0906994	0.349055	0.149423	0.136329	0.130283	-0.148062	0.107919	0.282149	-0.0502287	0.00841188	0.180449	-0.26649	0.40002	0.470771	-0.0761667	0.207352	0.0286584	-0.0737541	0.309697	-0.0192097	-0.0633725	0.195321	-0.318926	-0.0889125	-0.151731	-0.183699	-0.145989	0.0692586	0.111184	0.0123026
SIGNALING_BY_ERBB2	-0.0827091	-0.00211544	0.0823333	0.11323	0.00524035	-0.072923	-0.034487	0.00865117	-0.112981	0.0691624	0.0361273	0.0878724	0.0978794	0.099748	0.0919098	-0.0957915	-0.00926606	-0.105518	-0.00597691	-0.0489477	-0.0321839	-0.0105821	-0.036803	0.179678	-0.0807789	0.0647192	0.0955165	-0.160071	0.0135555	-0.155285	0.0273059	0.123506	-0.0705439	0.15101	0.178612	-0.130964	-0.0154071	0.0341238	-0.145567	-0.215586	-0.0115477	-0.0412359	-0.000717708	-0.0437689	0.0539588	-0.023106	-0.0625129	-0.0164288	0.0711655
SPHINGOLIPID_DE_NOVO_BIOSYNTHESIS	-0.101904	0.0462415	0.0766626	0.49206	0.313209	0.0111704	-0.344033	0.0459682	-0.121154	-0.218687	0.0231183	-0.046999	0.0232625	-0.0167274	-0.148582	-0.332852	0.138334	-0.0364813	-0.0978117	0.0727979	-0.206646	0.124653	-0.0499467	0.142709	-0.105393	0.345758	-0.187004	0.266153	-0.143083	0.136779	0.0332917	0.47859	-0.058824	-0.0579142	0.226087	-0.0326851	-0.260262	-0.246087	-0.277086	0.272777	0.146115	0.0732197	-0.262509	-0.16403	0.136762	-0.0753856	-0.293127	-0.152887	-0.194743
TERMINATION_OF_O_GLYCAN_BIOSYNTHESIS	0.342282	0.0544607	-0.0910151	-0.152459	0.028712	-0.166865	-0.159688	0.092349	0.0295413	0.102518	0.158413	-0.206908	0.0844437	0.0912199	-0.069973	0.0422059	0.00100098	-0.0141017	-0.0767992	0.0785423	-0.0296472	0.0506794	0.202927	0.0978954	-0.0062454	-0.152107	-0.263995	0.041999	-0.258288	-0.122123	0.0418624	-0.28564	-0.102745	-0.0274331	-0.142837	0.0539763	0.188831	-0.0954193	0.301091	0.0415683	-0.0220535	0.345202	-0.0209039	0.113768	0.0346815	0.0544311	0.203667	0.0432777	-0.0616371
DEFENSINS	-0.317073	0.14074	0.204576	0.218589	0.153137	0.193225	0.165891	0.204984	0.119036	-0.0395153	-0.128564	-0.19217	-0.212262	-0.34892	-0.406015	0.0496931	-0.129083	-0.333195	0.167607	-0.323501	-0.0197728	0.06478	-0.00210289	-0.27391	-0.212892	0.273297	0.013289	0.137161	-0.122473	0.128964	-0.055216	0.133134	-0.311639	-0.120199	0.0216608	0.120721	0.0318088	0.199415	0.0429534	-0.0490748	0.299277	-0.00606218	-0.163501	0.140529	0.0373062	0.0964311	-0.375344	-0.007333	0.0894758
SIGNALING_BY_CONSTITUTIVELY_ACTIVE_EGFR	-0.433836	0.299678	0.105064	-0.203355	-0.0784001	0.030398	0.183533	0.02035	-0.12635	0.00608104	0.0384705	-0.0697788	-0.186637	0.0506344	0.104119	-0.0731251	-0.0471846	-0.311242	0.0118865	0.338947	0.236234	0.356773	0.229603	-0.115363	-0.260866	0.0325653	0.232692	-0.0737218	-0.0919364	-0.111798	-0.0209996	-0.0322964	0.383044	0.243368	0.361781	-0.0938149	-0.35741	0.0143432	-0.1203	-0.115342	0.1463	-0.0381358	-0.0912354	-0.0264464	0.263403	0.23065	-0.229328	-0.174094	-0.0984318
GRB2_EVENTS_IN_ERBB2_SIGNALING	-0.0905457	-0.151083	0.234766	0.175056	-0.107432	-0.143172	-0.0138093	-0.207435	-0.0607487	0.108174	-0.137751	-0.0325026	0.16826	-0.0892903	-0.0168982	-0.0667912	0.307403	0.065481	0.125984	0.0183539	0.128769	0.135635	-0.129723	-0.0303579	0.0938082	-0.12466	0.211749	0.029771	-0.0712371	-0.251339	0.202756	-0.15428	0.0103329	0.251293	0.276925	-0.313747	-0.0649708	-0.0113478	-0.343524	0.110032	-0.315971	-0.189289	0.333196	-0.0722837	0.0291645	0.137487	-0.14147	-0.134091	-0.287624
SIGNALING_BY_EGFR_IN_CANCER	-0.139397	0.000974203	-0.027376	0.137184	0.0320521	-0.0143399	0.00869013	-0.024134	-0.148961	0.0356504	0.0285775	0.0368175	0.153754	0.224296	0.112462	-0.141073	-0.0665023	-0.149218	0.0165572	-0.108131	-0.0728803	-0.0576643	0.0276796	0.142056	-0.0473367	0.0453259	-0.0209793	0.0245559	-0.164649	-0.150858	0.0239823	0.0286769	-0.0234795	0.0177577	0.232308	-0.0425546	-0.0479792	-0.0260903	-0.0476193	-0.197422	0.073928	-0.142928	-0.0620994	0.0377523	0.01805	-0.143796	-0.098427	0.0657241	0.11491
MEMBRANE_BINDING_AND_TARGETTING_OF_GAG_PROTEINS	-0.168533	-0.0554203	0.552193	0.107818	0.159214	0.0454062	0.143585	-0.446281	0.0831214	-0.0958055	0.269863	-0.400559	-0.0331995	-0.545469	-0.408857	0.0532804	0.0141317	-0.235096	0.162928	-0.168327	-0.431675	0.248719	0.227671	0.394612	0.0271548	0.307743	-0.494009	-0.295158	-0.104736	0.204261	-0.144849	-0.0633773	0.313196	-0.0479339	0.0537291	-0.347935	0.230877	-0.238752	0.414547	0.164187	0.0637594	0.361577	0.214869	0.0795034	0.0770309	0.286298	-0.369292	0.0705396	0.0546549
BETA_DEFENSINS	-0.30127	0.176154	0.157205	0.279053	0.0615145	0.160414	0.175645	0.236755	0.16747	-0.0510101	-0.192796	-0.159185	-0.265597	-0.402511	-0.354723	0.0969254	0.010738	-0.265487	0.205218	-0.24342	-0.0997823	0.085972	-0.0569759	-0.279129	-0.0884085	0.138865	0.0656216	0.13698	-0.200403	0.0870295	-0.0663166	0.214516	-0.274872	-0.12726	-0.0219181	0.0264905	0.0438106	0.0832342	0.0693079	-0.0476065	0.287055	-0.133726	-0.308236	0.138895	0.201441	0.0218386	-0.349929	-0.0725983	0.121609
SRP_DEPENDENT_COTRANSLATIONAL_PROTEIN_TARGETING_TO_MEMBRANE	0.0655887	0.0736307	-0.151817	-0.291057	-0.328126	0.440888	0.182095	0.28241	-0.0192471	-0.308376	0.371218	-0.000595254	-0.513591	-0.0700234	0.256332	0.39498	0.116945	-0.0921037	-0.353813	0.452254	-0.159144	-0.24121	-0.102656	-0.0915959	-0.332654	0.0837149	0.0550988	-0.399623	0.0120171	-0.114345	-0.170625	0.120789	-0.168477	-0.230999	0.41077	0.383333	-0.380017	-0.307943	0.408715	-0.14565	0.467171	0.389868	-0.0554419	0.31816	-0.242537	-0.00443147	-0.467604	-0.231001	-0.259654
PI3K_EVENTS_IN_ERBB4_SIGNALING	-0.0434058	-0.0283294	0.119279	0.245581	-0.0292696	-0.133139	0.159036	0.110084	0.122735	0.0680295	0.154612	0.060197	0.159585	0.107049	0.0933272	-0.206451	-0.206021	-0.178629	-0.137823	-0.238316	0.0042771	-0.177089	-0.032342	0.0744513	-0.311759	-0.0517218	0.128151	-0.231631	-0.0241727	-0.30768	-0.0838793	0.204001	-0.0113044	0.0601986	0.356117	-0.250832	-0.00106971	0.152569	-0.263308	-0.0510228	0.0288341	-0.00782864	-0.034382	0.122361	0.217889	-0.0118021	-0.0663471	-0.134362	0.225804
SHC1_EVENTS_IN_ERBB4_SIGNALING	-0.0921558	-0.179876	0.322015	0.206646	-0.0615442	-0.15932	-0.0589008	-0.253013	0.0136933	0.0528609	0.0294377	-0.101324	0.13371	-0.160004	-0.0622652	-0.0721642	0.233294	0.043555	0.145283	-0.0554815	0.0015618	0.14287	-0.102778	-0.0237944	0.0774744	-0.115984	0.184208	-0.0617419	-0.159225	-0.268536	0.132775	-0.110451	0.155718	0.258288	0.299335	-0.294028	0.172545	-0.0925692	-0.385989	0.0315148	-0.294091	-0.14124	0.363	-0.149146	-0.0240887	0.0137654	-0.0189064	-0.113215	-0.192703
PI3K_EVENTS_IN_ERBB2_SIGNALING	-0.0763717	0.0118519	0.13812	0.130668	-0.133279	-0.114962	0.171869	0.132238	0.0340167	0.0280049	-0.00898307	0.104807	0.0847594	0.111314	0.143515	-0.181216	-0.100313	-0.226562	-0.12085	-0.111911	0.0812587	-0.123072	-0.0638602	0.0263044	-0.145227	0.00695214	0.19112	-0.14092	-0.0294606	-0.249407	-0.0687919	0.0564073	-0.0650497	0.0248593	0.33676	-0.261632	-0.130006	0.17474	-0.297658	0.0311811	-0.0622134	-0.0160497	0.0233949	0.111796	0.20105	0.110884	-0.145344	-0.168952	0.102975
NUCLEAR_SIGNALING_BY_ERBB4	-0.247317	-0.178784	0.0987966	0.186953	-0.0937675	-0.107659	-0.00508986	-0.160725	0.186011	-0.117717	-0.228003	0.00158762	0.046693	0.136363	0.0170194	-0.0422454	0.163945	-0.0085762	0.0522646	-0.0484677	0.223834	0.00108744	-0.0405585	0.0435361	0.0548447	-0.192772	0.299206	0.145544	0.107764	-0.228155	-0.299014	0.052619	0.377922	0.123093	0.123163	-0.044969	-0.0961487	0.121776	-0.113383	0.275906	0.0860683	-0.0742599	0.128523	0.0324174	-0.187028	-0.0988259	0.153765	0.141489	-0.0270269
GLYCOSPHINGOLIPID_METABOLISM	0.177783	0.1795	-0.440925	-0.254058	0.0787874	0.0355603	0.0637981	0.0173857	0.304142	0.0100566	-0.106061	-0.123802	-0.335649	-0.0198438	-0.0174618	0.211043	0.18262	-0.172242	0.200486	0.197821	-0.369004	-0.306599	-0.226761	-0.314484	0.357664	0.218795	-0.330062	0.393783	-0.343617	-0.120949	-0.0862332	-0.181059	-0.122411	-0.116113	0.0104474	0.0163627	-0.276844	-0.149649	-0.0158634	0.406365	-0.0255681	-0.0293097	0.0386781	0.318255	-0.397106	-0.10575	0.0849667	-0.149802	-0.0864295
PPARA_ACTIVATES_GENE_EXPRESSION	0.0410201	0.0241535	0.140042	-0.150652	0.080313	0.00388916	0.0236359	-0.201875	0.0256294	0.0192911	-0.115676	-0.0442492	-0.171965	-0.20625	0.0630404	-0.231688	0.19248	-0.0179019	0.0465075	-0.19637	0.191436	0.061798	0.0582699	0.00885427	0.0914871	0.0426659	0.241137	0.227371	-0.228557	-0.0810415	0.188496	0.0629933	-0.101077	-0.070536	0.0756489	0.00954478	0.146211	-0.220949	-0.0757002	-0.0861077	-0.0324458	0.0497055	-0.130634	0.0247295	0.014521	0.0767462	-0.184657	-0.0771094	-0.0170138
ASSOCIATION_OF_LICENSING_FACTORS_WITH_THE_PRE_REPLICATIVE_COMPLEX	-0.352395	0.0406027	0.3246	-0.331014	-0.153032	0.681535	-0.0477773	0.241114	-0.604397	0.237264	0.120625	0.167835	0.321116	0.575203	0.116413	0.171683	-0.339721	-0.475956	0.106774	0.527962	0.149898	-0.398353	0.138939	-0.101208	-0.401947	-0.110899	0.0361209	-0.465381	0.0100638	0.0674218	0.217403	-0.151789	0.461891	0.15884	0.240276	0.374652	-0.124798	-0.0973019	0.618394	-0.457306	0.0194008	-0.0847881	0.00534502	-0.689757	0.117861	0.399404	-0.658702	0.400951	0.0815652
RIP_MEDIATED_NFKB_ACTIVATION_VIA_DAI	0.312494	-0.333448	-0.259158	0.170673	0.250691	-0.0439567	0.0397047	-0.32383	0.454276	-0.196772	-0.135616	-0.0586467	0.444532	-0.0113755	0.0636053	-0.18572	0.53934	-0.305684	-0.0192075	0.271435	0.0544746	-0.167449	-0.205725	-0.173614	0.379067	0.0351223	0.304415	0.225907	-0.432288	-0.226223	0.018409	-0.261933	-0.195053	-0.333623	0.148224	-0.319104	-0.228629	-0.0174637	-0.180559	-0.0358909	-0.0496019	-0.0088155	-0.217849	-0.327352	0.201205	0.148752	-0.10666	-0.0811812	0.0249523
PRE_NOTCH_TRANSCRIPTION_AND_TRANSLATION	-0.0652737	-0.125743	0.000497473	-0.0558456	-0.183943	0.277107	0.0884374	-0.235585	-0.494646	0.104016	-0.349934	0.393234	-0.0693615	0.29606	0.0303352	0.26033	0.191312	0.250122	-0.130499	0.0106168	0.350291	-0.243272	-0.129998	-0.178153	-0.384575	0.121028	0.290412	0.297994	0.0375963	0.224186	0.218539	0.133683	-0.0136571	-0.0964427	0.0713787	0.164116	-0.0833556	0.0787216	0.033144	-0.128983	0.167828	0.268563	-0.0219528	-0.437894	-0.151315	0.233992	-0.360505	0.320462	0.0820747
DEGRADATION_OF_THE_EXTRACELLULAR_MATRIX	0.0825773	-0.000657536	0.0743122	-0.21877	-0.118721	0.152109	0.24776	0.0231953	0.26446	0.0757356	-0.0449816	0.0158098	0.214993	-0.103892	-0.0179713	0.0736572	-0.0718484	-0.124912	0.251267	0.134345	-0.113579	0.150335	-0.391893	-0.131268	0.394139	0.086055	-0.0379623	0.233099	-0.180453	-0.135679	-0.167348	0.250234	0.169784	-0.162119	0.225781	-0.117252	-0.193553	0.0756066	0.00456314	0.166339	0.254477	-0.322578	0.116122	0.236519	-0.213988	-0.0210335	-0.1063	0.142019	-0.194049
MITOCHONDRIAL_PROTEIN_IMPORT	0.185083	0.136191	0.0846853	-0.574218	-0.330874	0.457495	-0.0663408	0.549151	0.173832	-0.408769	-0.0895067	-0.0736914	-0.249217	0.0988881	0.0172056	0.382571	0.0524299	-0.0568333	-0.134687	0.0492841	-0.10502	-0.340953	-0.249703	-0.0923191	-0.106901	-0.249926	-0.526633	-0.472986	-0.198213	0.0868262	0.362519	-0.493574	0.141546	-0.384643	0.0733582	0.377962	0.0465763	0.378516	0.439823	-0.0235525	0.315402	0.239456	0.410632	-0.140198	-0.280581	0.145661	-0.217915	-0.188765	0.0579815
SIGNALING_BY_HIPPO	-0.169513	-0.107215	0.268691	0.108398	0.00816489	-0.00679971	0.129999	0.0149707	-0.0822066	-0.144524	-0.400407	-0.229833	0.0474564	-0.284403	-0.27949	0.0320269	0.551009	-0.242394	-0.0381384	0.173809	-0.0899246	0.170442	0.140629	-0.103319	-0.360033	0.236565	0.426285	0.311571	-0.244158	-0.01066	0.237681	0.113379	-0.373428	0.336899	0.0440541	-0.246855	-0.104041	-0.382033	-0.23364	0.181509	0.111561	-0.10159	0.0157939	-0.373643	0.0562071	0.0255945	-0.162599	-0.269422	-0.0183997
ACTIVATED_NOTCH1_TRANSMITS_SIGNAL_TO_THE_NUCLEUS	0.130463	-0.131633	0.00160159	-0.0915756	0.201104	-0.330047	0.228401	-0.256181	0.0927397	0.318095	-0.0925105	-0.167008	0.0967688	0.0166835	0.117556	-0.00927867	-0.200742	0.0223369	0.0414742	-0.299187	-0.212173	0.00555402	-0.0990755	0.0320357	0.0430177	0.0252028	0.0165986	0.155428	0.0928158	-0.122352	-0.0766122	0.204014	0.198221	0.199261	-0.282962	0.101619	-0.0913057	0.0406084	0.210877	0.233403	-0.200239	0.000793761	0.228136	0.376534	-0.0299479	0.0453923	0.190266	-0.0149648	-0.0656107
TRAFFICKING_AND_PROCESSING_OF_ENDOSOMAL_TLR	0.222953	-0.0368612	0.16037	-0.312726	0.675821	-0.455757	0.127328	0.280086	0.360763	0.536034	-0.153865	-0.391894	-0.196044	-0.542561	-0.301073	-0.276604	0.578941	-0.250482	-0.0259351	-0.198902	-0.649201	-0.100608	-0.0489774	-0.0262943	0.473886	0.32984	-0.0553788	0.43955	-0.121072	0.140338	-0.247134	-0.209735	-0.350167	-0.311424	-0.290224	-0.184201	0.0491205	-0.280799	-0.163813	0.347715	0.314769	0.0792559	0.54017	0.122389	-0.4119	-0.400643	0.168549	-0.142323	0.138769
SIGNALING_BY_NOTCH4	0.174875	-0.533541	-0.253733	-0.124339	0.235347	-0.411632	0.16057	-0.565433	0.0935492	0.189131	0.190128	-0.497764	0.135497	-0.10063	0.184087	-0.41102	-0.162229	-0.121947	0.342844	-0.427907	-0.146414	-0.27709	-0.391026	-0.136799	0.217202	-0.00152867	0.0748855	0.405546	0.0116394	0.317599	-0.128587	0.197823	0.336786	0.0787208	-0.391221	-0.14244	0.00740104	0.349989	-0.299421	0.506439	-0.222433	-0.1493	0.316677	0.315845	0.35396	0.0855675	0.0498903	-0.123678	0.162564
DOWNSTREAM_SIGNALING_EVENTS_OF_B_CELL_RECEPTOR_BCR	-0.161653	0.119185	-0.0524384	-0.127224	-0.172725	-0.098057	0.146705	-0.0767604	0.256685	-0.0905836	-0.175574	0.153689	-0.133423	0.239539	0.0300952	-0.254019	0.021103	-0.312816	0.0531905	-0.135807	0.105699	-0.0265965	0.0446462	-0.321901	0.0304962	0.059025	0.112585	-0.23522	-0.115603	-0.0914171	0.279346	-0.187422	0.288646	-0.0259603	0.185148	-0.15154	0.0950906	-0.198939	-0.189607	0.0496902	-0.0278544	0.134163	-0.0765394	0.0389101	0.0961115	-0.221315	-0.120102	-0.00956649	0.403153
ACTIVATION_OF_NF_KAPPAB_IN_B_CELLS	-0.212008	0.0685776	-0.0333086	-0.26761	-0.26146	-0.0649475	0.18774	-0.125203	0.376597	-0.169652	-0.426898	0.0966778	-0.276472	0.274068	-0.0381303	-0.222222	0.188201	-0.28501	0.0212256	-0.0731209	0.095248	-0.0984621	0.124658	-0.434546	0.117117	-0.00947466	0.0502	-0.180265	-0.0804254	-0.000857398	0.363381	-0.396034	0.447738	-0.0111629	0.172312	-0.13384	0.117057	-0.260207	-0.0457511	0.156031	-0.113663	0.141105	-7.84e-05	0.0768171	-0.022111	-0.170854	-0.0761142	0.0863224	0.404108
RORA_ACTIVATES_CIRCADIAN_EXPRESSION	-0.231259	-0.482072	0.235487	0.0809024	0.134994	0.0279248	-0.0420032	-0.265512	-0.343995	-0.077757	0.0725082	-0.113373	0.12007	-0.0288521	0.132096	-0.322725	0.384542	0.245929	-0.0544637	-0.0918188	0.424098	-0.0944756	0.384485	-0.294382	-0.0316006	0.193641	0.0982425	0.308028	-0.364442	-0.195156	0.379907	0.0791988	-0.0997634	0.054965	-0.172733	0.193137	-0.0993901	-0.390418	-0.378485	-0.344361	-0.019087	0.147496	0.224154	0.244704	-0.311715	-0.114011	-0.198804	-0.0639787	-0.121434
ANTIGEN_ACTIVATES_B_CELL_RECEPTOR_LEADING_TO_GENERATION_OF_SECOND_MESSENGERS	-0.041556	0.231949	0.220615	0.201029	0.276012	-0.13927	-0.377669	-0.0811657	-0.268907	0.343915	0.0366007	-0.0564597	0.190482	-0.105837	-0.259853	-0.222875	-0.116918	-0.0308017	0.0593925	-0.126914	0.0874101	0.14169	0.343121	0.403433	-0.0711983	0.274604	-0.132788	-0.187382	-0.196432	-0.233	0.234582	0.0907287	-0.0926705	-0.145876	0.153752	0.0551162	0.268063	-0.193652	-0.258458	-0.2717	0.197888	0.0462917	-0.188004	-0.18147	-0.231659	-0.177669	0.224465	0.0556492	0.00978188
REGULATION_OF_COMPLEMENT_CASCADE	0.467684	-0.449992	0.124871	-0.407443	0.1015	-0.523443	0.0425676	0.257267	0.45031	-0.264803	0.190443	-0.443766	-0.610831	-0.496871	-0.318384	-0.16508	0.580314	0.0416339	-0.371457	-0.471035	-0.403055	0.302904	0.238808	0.00573781	0.414521	-0.467612	0.40845	0.477604	0.226698	-0.311186	-0.0166253	-0.449414	-0.171842	-0.122813	-0.234996	-0.4236	0.0693069	-0.32107	0.165994	0.491847	-0.00442907	0.298103	0.454258	0.589406	-0.245543	0.0945775	-0.185685	-0.358282	0.123404
YAP1_AND_WWTR1_TAZ_STIMULATED_GENE_EXPRESSION	-0.311273	-0.407362	0.351431	-0.0503459	-0.00659707	-0.137224	0.332403	0.073073	-0.453769	0.0105673	-0.0942854	0.0145621	-0.0520693	-0.195343	0.0202681	-0.187946	0.423916	0.286773	-0.111063	0.215195	0.424233	-0.215135	0.026735	-0.249371	-0.216733	0.0646019	0.434929	0.407865	-0.161631	-0.230956	0.319014	0.341486	-0.0185531	-0.329758	0.248195	-0.0202793	0.180317	-0.482288	-0.348176	0.19491	-0.0906443	0.320855	0.156542	-0.271229	-0.333885	0.120133	-0.339517	-0.0889176	-0.314425
SIGNALING_BY_NOTCH2	0.169829	-0.545694	-0.371428	-0.0947924	0.312677	-0.423114	0.325805	-0.353471	0.27243	0.0931354	0.190231	-0.413298	-0.0915992	-0.306472	0.184087	-0.383855	-0.0702371	-0.153269	0.0785912	-0.38084	-0.133521	-0.305994	-0.444998	-0.245068	0.373768	-0.0387582	0.223344	0.491041	-0.0673854	0.119652	-0.0983103	0.08755	0.232842	0.113455	-0.393937	-0.122353	0.0100383	0.263771	-0.255459	0.565636	-0.188708	0.200468	0.331033	0.319754	0.159816	0.219409	-0.00829632	-0.029963	-0.0419218
PRE_NOTCH_EXPRESSION_AND_PROCESSING	-0.00887578	-0.121691	0.0104328	0.0193909	-0.00455697	0.172766	-0.0126144	-0.209307	-0.209288	0.0314244	-0.0964916	0.183376	-0.0272105	0.0642601	0.0168088	0.237945	-0.0863713	0.0207593	-0.15121	-0.110327	0.0358231	-0.154515	-0.170119	-0.140079	-0.0637624	0.174524	0.107919	0.368608	-0.151094	0.194478	0.235904	0.171903	-0.1533	-0.0425505	-0.0151397	0.153759	-0.0677674	-0.0539091	-0.0285571	-0.212427	0.134361	0.0953103	-0.0904729	0.0284528	-0.216192	0.0633194	-0.264776	0.278195	0.0978299
SIGNALING_BY_THE_B_CELL_RECEPTOR_BCR	-0.140989	0.164653	0.0200807	-0.0322209	-0.0221019	-0.11529	0.00944498	-0.0637599	0.112612	0.0230375	-0.117724	0.1206	-0.0489683	0.183277	-0.0554948	-0.238712	-0.016113	-0.261642	0.0439589	-0.155925	0.0959327	0.0160206	0.149025	-0.128287	-0.0113118	0.111974	0.0573165	-0.208349	-0.133794	-0.142351	0.272462	-0.117966	0.188296	-0.049316	0.182702	-0.108585	0.148624	-0.207351	-0.2042	-0.0226269	0.0317118	0.132817	-0.102819	-0.0223041	0.0606998	-0.215181	-0.0454698	0.0163316	0.333049
EXTRACELLULAR_MATRIX_ORGANIZATION	0.109357	0.108341	0.0100727	-0.162946	-0.158539	-0.0452486	0.15693	0.300037	0.347257	0.277883	-0.0784818	0.0573181	-0.0100634	0.0869028	-0.193273	0.248792	0.237095	-0.218183	0.0735017	-0.0485922	0.00193075	0.0040877	-0.319662	0.0505896	0.195094	-0.044495	0.0513517	0.408321	-0.149743	-0.328324	-0.0517039	0.0749122	0.143719	-0.0803689	0.214059	0.188072	-0.124991	0.0482912	-0.000389011	0.103675	0.215907	-0.0128957	0.176287	0.261455	-0.360465	0.0221752	0.124092	-0.0013891	-0.349929
NOTCH1_INTRACELLULAR_DOMAIN_REGULATES_TRANSCRIPTION	0.0407903	0.00142805	0.181669	0.0871215	-0.0308327	0.306904	-0.12289	-0.022962	-0.331536	0.0373869	-0.0438955	0.343358	-0.123529	-0.0532086	-0.0857313	0.226025	0.0768123	0.0677418	-0.151081	0.0600965	0.263121	-0.267319	0.0644833	-0.236737	-0.315624	0.27454	0.151595	-0.10028	-0.204303	-0.189208	0.168707	0.204263	-0.00909976	-0.13415	-0.0121537	0.212744	-0.094367	-0.125255	0.323613	-0.19677	0.181332	0.202788	-0.109989	-0.143005	0.136328	-0.125572	-0.406354	0.272469	0.0210446
CIRCADIAN_REPRESSION_OF_EXPRESSION_BY_REV_ERBA	-0.237452	-0.504755	0.168793	0.0656387	0.129303	0.1315	-0.0667243	-0.259376	-0.355374	-0.0861313	0.150174	-0.116312	0.201564	-0.11224	0.0867543	-0.366408	0.431626	0.284723	0.0139154	0.0284587	0.40611	-0.133456	0.344238	-0.30738	-0.131563	0.294323	0.299838	0.291305	-0.311493	-0.200078	0.333961	0.164587	-0.106278	0.0494294	-0.108416	0.241408	-0.208782	-0.365443	-0.376061	-0.372271	0.127788	0.15793	0.156836	0.212995	-0.351947	-0.11791	-0.150121	-0.112463	0.0164284
PRE_NOTCH_PROCESSING_IN_GOLGI	0.209358	0.117583	-0.0993905	0.29167	0.164975	0.0655798	-0.0393409	-0.27281	0.182865	0.0220163	0.258421	-0.268649	0.21441	-0.278922	-0.151175	0.0645102	-0.328935	-0.298006	-0.248061	-0.493075	-0.308864	0.12569	-0.191123	0.0366394	0.4385	0.329667	-0.390975	0.481233	-0.481919	0.172852	0.152216	0.170727	-0.242236	0.0715994	-0.145204	0.0444535	0.0262741	0.0420228	-0.221906	-0.191164	0.0289231	-0.132742	-0.112823	0.509882	-0.0949357	0.0551678	-0.111944	0.157293	-0.0366638
SIGNALING_BY_NOTCH1	0.0964067	-0.0531251	0.0960158	0.0270312	0.0710993	0.00785727	-0.0555772	-0.124173	-0.164034	0.171739	-0.0503222	0.172076	-0.0415419	-0.0494569	0.0260907	0.0789115	-0.00826949	0.0325546	-0.0528603	-0.088982	0.0804553	-0.118953	0.00358526	-0.147734	-0.159236	0.195864	0.108935	0.0096726	-0.118665	-0.173271	0.0663822	0.228242	0.0676023	0.00795139	-0.15367	0.15754	-0.0602986	-0.0621859	0.275405	-0.0193298	0.00943577	0.146307	0.0172369	0.062752	0.0880649	-0.0385634	-0.189608	0.145271	0.0238167
SIGNALING_BY_NOTCH3	0.164251	-0.539985	-0.225771	-0.176928	0.0686329	-0.46187	0.339128	-0.569537	0.124499	0.265736	0.184855	-0.458432	-0.00520098	-0.179262	0.201358	-0.364752	-0.0239445	-0.225653	0.0548457	-0.431154	-0.131655	-0.381748	-0.498268	-0.2432	0.378914	-0.0155839	0.287298	0.489024	0.0769029	0.146969	-0.131283	0.145753	0.146652	0.0850741	-0.443695	-0.0960388	0.0100306	0.220595	-0.289276	0.559831	-0.225581	0.0606033	0.456014	0.290768	0.297984	0.293086	0.0164642	-0.0142581	0.198357
TRIGLYCERIDE_BIOSYNTHESIS	-0.0741911	0.299988	0.104241	-0.112977	0.0447504	0.288981	-0.16856	0.0622601	0.0929027	0.283296	-0.1512	-0.16887	0.237703	-0.0456546	0.185694	0.0532135	0.0161038	0.0637724	-0.310196	-0.155315	-0.140883	0.262724	0.0528727	-0.0849585	0.146437	-0.341271	-0.178489	0.248924	-0.297257	0.0467086	-0.159072	-0.0142719	-0.125276	0.0360085	-0.0971966	0.20436	0.175779	0.199225	0.0146353	-0.373314	0.249584	-0.10093	0.0319087	-0.0966766	-0.387464	-0.270386	-0.0726834	-0.0033984	-0.142894
INSULIN_RECEPTOR_SIGNALLING_CASCADE	-0.0493669	0.18079	-0.0428365	0.123905	0.15021	-0.0792426	0.0866689	0.0618611	-0.0561526	0.080214	0.234856	0.101143	0.125695	-0.102478	-0.0821617	0.0247107	-0.0971721	-0.219873	-0.0944586	-0.153088	0.0931476	-0.104898	-0.0329325	-0.14395	0.154471	0.136954	0.000217158	-0.104298	-0.177445	-0.254312	-0.0835084	0.109565	-0.0361937	-0.186183	0.269998	0.0198378	-0.147066	-0.110611	-0.0410786	0.088857	0.0425846	0.0767214	-0.0417978	0.0547163	-0.0122557	0.201029	-0.16782	-0.0540041	-0.120771
ARMS_MEDIATED_ACTIVATION	-0.327473	-0.129417	-0.23858	0.023669	-0.0307666	0.0914117	0.0379716	-0.269808	-0.20643	0.166012	0.249302	0.0629891	0.442896	-0.0783128	0.229622	-0.0296367	0.120309	0.0702749	0.327506	-0.206388	0.343634	0.309101	-0.0329607	-0.113706	-0.0130713	-0.0574023	0.138358	0.256439	-0.462525	0.0534769	0.258419	0.00575338	0.00578618	0.0174569	0.228997	-0.078658	-0.107915	-0.11253	0.098878	-0.306356	-0.124664	-0.158235	-0.120649	-0.133255	-0.0913516	-0.377493	-0.259332	0.228643	0.155851
PROLONGED_ERK_ACTIVATION_EVENTS	-0.347923	-0.183145	-0.261715	-0.0596276	-0.140457	0.0769969	0.108962	-0.309096	-0.241282	0.0452463	0.29656	0.069296	0.487636	0.0142124	0.273145	-0.123092	0.100693	0.0927911	0.297334	-0.0629688	0.352948	0.207716	-0.0706404	-0.149349	-0.125353	-0.133348	0.214807	0.282445	-0.27961	0.0202694	0.332465	0.00576067	0.161482	0.0174783	0.212978	-0.189355	-0.0691921	-0.204333	0.0339142	-0.315639	0.014071	-0.0568819	-0.221334	-0.171398	-0.113714	-0.304107	-0.226073	0.208235	0.162978
SIGNALLING_TO_RAS	-0.0183912	0.275433	0.0478725	0.141235	0.0890853	0.0736479	-0.252018	-0.278028	-0.236407	0.194692	0.235215	-0.157272	0.107984	-0.0975125	0.243997	-0.238457	-0.0100007	-0.351377	0.19348	-0.228894	0.117256	0.433682	0.115744	-0.123377	0.0238264	0.2712	0.044352	-0.0357886	0.0421192	-0.058743	0.194758	0.0883952	0.136418	0.0574914	-0.0358143	-0.192105	-0.20362	-0.081696	-0.295036	-0.10913	-0.0904581	-0.124441	-0.0775716	0.00987403	0.00528829	-0.159563	-0.0918854	-0.179655	-0.0279048
SIGNALING_BY_BMP	-0.0955206	-0.392629	-0.193542	0.390935	-0.0154213	-0.580518	0.0636976	0.21375	-0.114721	-0.242969	0.195136	0.452464	0.211139	-0.0599786	0.0033879	-0.13488	0.443416	0.324493	-0.299479	0.436755	0.144843	0.0494601	-0.0153357	-0.363671	-0.423644	0.184329	0.50283	-0.238677	0.300589	-0.153756	-0.183755	0.068891	-0.00928314	-0.037054	0.304065	-0.292917	-0.389113	0.139723	-0.098036	0.10506	0.395449	0.162471	-0.347183	-0.412389	-0.0630546	-0.0875064	-0.0645577	0.101618	-0.0553263
CELL_SURFACE_INTERACTIONS_AT_THE_VASCULAR_WALL	0.0651312	0.200819	0.0175977	-0.0829448	0.228772	-0.147453	-0.222225	0.184335	0.292472	0.0933189	0.0588897	-0.294156	0.13643	-0.208091	0.0434035	-0.163075	-0.101444	-0.252633	-0.0317639	0.115751	-0.0430966	0.301921	0.0631168	0.01092	0.201666	0.222757	0.14768	0.0798805	-0.11046	-0.20624	-0.136563	0.0838909	-0.080893	-0.0955352	0.253631	-0.0997948	-0.120864	-0.190087	-0.127318	0.0459999	0.0135195	0.016525	0.0194597	0.141076	-0.163465	-0.0572006	0.0256809	-0.0586261	-0.129441
NGF_SIGNALLING_VIA_TRKA_FROM_THE_PLASMA_MEMBRANE	-0.0709714	0.0901506	-0.0496259	0.178483	-0.00496339	-0.0385622	-0.00879679	-0.0545394	-0.163135	0.110844	0.158649	0.0588377	0.190373	0.132461	0.104585	-0.0884077	-0.0967437	-0.104967	0.0907036	-0.182051	0.100504	0.0403732	-0.0165729	0.167698	-0.0252038	0.102284	0.00275918	-0.0393912	-0.0631091	-0.143656	0.160322	0.143096	-0.0429769	0.0295959	0.153684	-0.0689617	-0.0262112	-0.0128621	-0.100398	-0.169314	-0.092507	-0.102362	-0.134326	0.0498232	-0.030864	-0.265537	-0.100492	0.0308197	0.0778794
SIGNALLING_TO_ERKS	-0.121105	0.194494	-0.0569768	-0.0846491	-0.126907	0.0181506	-0.0399065	-0.252851	-0.232793	0.0912327	0.213466	-0.0897954	0.230935	-0.0050872	0.272001	-0.251843	0.0731175	-0.227806	0.143751	-0.111708	0.19955	0.290115	0.0868518	-0.0961915	-0.00538647	0.0461299	0.152447	0.127253	0.107343	0.0193951	0.220631	0.0380456	0.220409	0.00315151	0.0787031	-0.250685	-0.132103	-0.139677	-0.146056	-0.118961	-0.105219	-0.0136359	-0.0903653	0.061632	-0.0530807	-0.171453	-0.0976247	-0.0380903	0.0242962
P38MAPK_EVENTS	0.15228	0.463878	0.274535	-0.271472	0.155732	-0.0920044	-0.33868	-0.207072	-0.0462388	0.21099	0.278182	-0.232762	0.212486	-0.230345	0.342591	-0.202889	-0.184116	-0.632572	0.131367	-0.138666	0.173291	0.493925	0.0588107	-0.106005	0.0501953	-0.0479822	0.0129857	-0.119923	0.256193	0.00632268	0.459305	-0.0414767	0.156708	-0.18991	-0.0592424	-0.23577	0.091574	0.0979488	-0.296683	0.0183444	-0.143519	-0.0344582	0.0695374	0.00735255	0.129033	-0.204892	-0.202955	-0.31166	0.121568
ACYL_CHAIN_REMODELLING_OF_PI	0.279763	0.0901918	0.187151	0.182586	-0.0150177	-0.295622	0.177447	0.00782743	0.126356	0.0336746	-0.337336	-0.324461	0.0628945	-0.182945	-0.094726	-0.280799	0.178239	-0.15737	0.248424	0.398496	0.245677	0.0596801	0.213506	0.360521	0.291911	0.0494004	0.377469	0.243015	-0.178554	-0.394223	0.518249	0.128955	-0.0232548	0.0432326	-0.0769537	-0.151068	0.148823	-0.308805	0.203674	0.0282017	-0.384217	0.20475	-0.0261283	-0.360179	-0.123418	0.233439	-0.355014	-0.647567	0.169342
TGF_BETA_RECEPTOR_SIGNALING_IN_EMT_EPITHELIAL_TO_MESENCHYMAL_TRANSITION	0.213396	-0.159019	0.215812	0.311368	0.0893277	0.279385	0.380585	-0.251545	-0.15929	-0.00470555	-0.274646	-0.44527	0.214093	-0.269559	-0.0666575	-0.348581	-0.0470885	-0.223036	0.170378	-0.0622989	-0.175918	-0.176942	-0.0303312	-0.220139	0.104621	0.167938	0.200351	0.0599752	-0.372881	-0.0593237	0.158784	-0.0512914	-0.0837522	-0.0351111	0.0286414	-0.214877	-0.0316007	-0.250897	-0.165732	0.161341	-0.0389386	0.0555145	0.327025	0.0541065	0.347546	0.182652	-0.118188	-0.224377	-0.154076
DOWNREGULATION_OF_TGF_BETA_RECEPTOR_SIGNALING	-0.290959	-0.134346	0.337951	0.16949	-0.0127709	-0.142936	0.305018	-0.357809	-0.179967	-0.303711	0.28245	0.21306	-0.0140083	0.10768	0.277498	0.0520747	0.246404	0.147234	-0.343996	-0.209879	0.0107633	-0.159433	-0.10215	-0.0506047	-0.625076	-0.374301	0.261814	-0.0367724	0.351668	-0.184286	0.264728	0.103166	0.328493	-0.448737	0.224861	-0.0881378	-0.204174	-0.111871	0.192524	0.163305	0.296785	0.389722	0.125326	-0.145581	-0.105006	0.149343	-0.407739	0.10665	0.0149959
COLLAGEN_FORMATION	0.136744	0.149227	0.0237205	-0.159163	-0.19279	-0.112153	0.112447	0.391343	0.382203	0.377775	-0.0858816	0.0421175	-0.0930318	0.170265	-0.228979	0.306161	0.359183	-0.275335	-0.0635447	-0.158157	0.0607441	-0.0831751	-0.302457	0.123188	0.0774114	-0.0807494	0.0695481	0.488184	-0.0896619	-0.397538	0.00913529	0.00812328	0.124181	-0.0773762	0.21926	0.27532	-0.0782445	0.0317044	-0.0103634	0.0601005	0.169515	0.1572	0.181352	0.24935	-0.395525	0.0341705	0.256676	-0.105415	-0.414433
SMAD2_SMAD3_SMAD4_HETEROTRIMER_REGULATES_TRANSCRIPTION	0.323942	0.125249	0.233467	0.223693	0.255234	0.0374398	-0.0258398	0.0342253	0.16927	-0.176233	-0.0247968	0.134667	-0.380834	-0.273726	0.152418	-0.0682528	-0.0905418	-0.0300958	-0.356477	0.237627	0.182241	0.0586499	-0.14525	-0.139441	-0.332886	0.378074	0.470325	-0.277983	-0.0337828	0.13511	-0.0635804	0.0216024	-0.0249358	-0.393194	0.151342	-0.0430136	-0.25105	0.056592	0.0613992	-0.0227886	0.295785	0.366625	-0.107493	-0.00721316	0.401562	0.187148	-0.529339	-0.260546	-0.338032
SIGNALING_BY_FGFR_IN_DISEASE	-0.155534	0.0442785	0.0042417	0.137082	0.172109	-0.065877	0.0392077	-0.0741654	-0.133366	0.0639724	0.144381	0.0642211	0.168555	0.036694	0.107323	-0.232326	0.0308736	-0.12392	0.115512	-0.0943534	-0.0293756	-0.0484809	0.0952874	0.0724734	-0.0725875	0.121202	0.128124	-0.0147839	-0.168253	-0.188105	0.218441	0.199745	-0.0570701	-0.00353165	0.112563	-0.00125774	-0.0116829	-0.0706194	-0.102276	-0.0694666	0.149013	-0.021232	-0.101411	-0.0496559	-0.00444295	-0.121737	-0.144005	0.0174335	0.0725248
HS_GAG_DEGRADATION	0.382676	-0.0696913	-0.174882	0.0200393	0.0562976	-0.2916	0.216927	-0.139716	-0.0822393	0.191575	-0.417026	0.0899362	0.232536	-0.165526	0.0415129	0.023813	0.221451	-0.2867	0.452703	-0.0420978	0.366178	0.365109	-0.17164	-0.180332	0.33585	-0.0499634	-0.427995	0.504955	-0.400293	-0.0727137	-0.255636	-0.048778	-0.235266	-0.0308637	-0.172866	-0.110894	-0.161089	-0.434725	-0.261438	0.0913793	0.234638	-0.213129	0.0268164	-0.0650719	-0.499335	-0.393821	0.0477746	0.154955	0.15779
SYNTHESIS_OF_PIPS_AT_THE_EARLY_ENDOSOME_MEMBRANE	-0.0637973	-0.163015	0.358417	-0.155398	-0.155927	-0.13017	0.167779	0.121787	0.309092	-0.00990773	0.201597	0.117674	-0.262496	-0.433733	-0.033893	-0.228355	-0.255247	0.120202	0.009772	0.185874	-0.233995	-0.132897	0.311415	0.483742	-0.444014	-0.178836	0.466396	-0.138451	0.341146	0.139248	0.272064	0.0614955	0.44155	0.0175415	0.172751	-0.0956048	0.0391542	-0.405505	-0.00935079	-0.234821	-0.21009	-0.205045	-0.243192	-0.0758263	0.545489	0.197316	-0.126586	-0.307456	0.377545
SIGNALLING_TO_P38_VIA_RIT_AND_RIN	-0.286295	-0.138627	-0.29638	0.0929418	0.165734	0.0636406	-0.0728767	-0.417222	-0.181002	0.22518	0.199199	0.134436	0.250268	-0.207772	0.134097	-0.138868	0.22658	0.216277	0.360958	-0.259403	0.104886	0.221297	0.118871	-0.0515141	0.146613	0.0227038	0.237465	0.250463	-0.252133	0.131699	0.0813641	0.061768	0.109632	0.282928	0.117169	-0.285027	-0.160633	0.00170474	-0.119478	-0.265385	-0.217259	-0.295663	-0.13857	-0.0321465	0.221913	-0.339891	-0.133274	0.0209605	0.170625
P53_INDEPENDENT_G1_S_DNA_DAMAGE_CHECKPOINT	-0.320197	0.38026	0.0986373	-0.322909	-0.32468	-0.0932277	0.170399	-0.0932979	0.205539	-0.23358	-0.477836	0.133858	-0.309311	0.245137	-0.0251346	-0.142232	0.16334	-0.231448	0.0138417	-0.0591063	-0.0136387	-0.141802	0.269269	-0.470828	0.17332	-0.13111	-0.00790116	-0.310069	-0.0551879	0.0924647	0.45655	-0.445527	0.451656	-0.0748353	0.101106	0.135836	0.319867	-0.236416	0.147123	0.0559327	-0.0877001	0.176888	0.0583191	-0.089238	0.00474223	-0.116635	-0.148474	-0.0911439	0.364413
REGULATION_OF_HYPOXIA_INDUCIBLE_FACTOR_HIF_BY_OXYGEN	0.365309	-0.256825	0.141425	-0.100611	-0.117142	0.30778	0.291405	0.0592199	-0.217742	0.129161	-0.395963	0.0930932	-0.00554952	0.0054845	0.0352553	0.21415	0.356935	0.336486	-0.423828	-0.127499	0.117064	-0.299512	0.258802	-0.155237	-0.0918798	0.163932	0.0206662	0.217599	-0.0936277	-0.164683	0.0144459	0.0674298	-0.118876	-0.190423	0.210295	0.136234	-0.34651	-0.0381912	0.152432	0.038101	0.481558	0.186825	0.278008	0.240682	-0.125143	-0.105135	-0.463699	0.101843	-0.336099
ACYL_CHAIN_REMODELLING_OF_PC	0.342935	0.186771	0.195907	0.204355	0.115286	0.0285247	-0.0878416	0.0417408	0.0756296	0.185219	-0.248328	-0.41409	0.202355	-0.283167	-0.00931706	-0.174257	0.168728	-0.160751	0.296987	0.151677	0.0374566	0.356748	0.224755	0.34528	0.104473	0.252258	0.190352	0.271374	-0.266615	-0.158783	0.0892842	0.266401	-0.111797	0.242149	-0.290408	-0.0134001	-0.0501043	-0.260772	-0.0105315	-0.0885878	-0.270089	-0.139338	0.0616971	-0.401747	0.0178413	-0.316602	-0.302092	-0.47812	0.174671
SYNTHESIS_OF_PIPS_AT_THE_GOLGI_MEMBRANE	-0.114334	-0.145396	-0.361528	0.0984153	-0.111004	0.0444582	0.0674413	-0.0485023	0.0759899	-0.250325	0.356652	0.363384	-0.333034	-0.157653	0.0361027	-0.295635	0.185163	0.373542	0.0778001	-0.146628	-0.394526	-0.435823	0.267868	0.349485	-0.286699	-0.159339	0.477328	0.0082644	0.470255	0.277722	-0.109409	0.0853171	0.0303007	0.000696324	-0.0839403	-0.137103	-0.227597	-0.259418	0.0682366	-0.237229	-0.222194	0.153995	-0.106524	-0.0338573	0.363246	0.103419	0.351175	-0.0804254	0.0800425
TGF_BETA_RECEPTOR_SIGNALING_ACTIVATES_SMADS	-0.192719	-0.0418002	0.326558	0.20453	-0.000835152	-0.0343258	0.241354	-0.360047	-0.0744314	-0.22252	0.319221	0.184029	-0.0693379	0.0421014	0.261384	-0.069366	0.0924407	0.0711913	-0.308663	-0.085747	-0.0661884	0.00191611	-0.204424	-0.0360462	-0.575733	-0.282989	0.22606	-0.0868706	0.239758	-0.0315798	0.204747	0.13758	0.124533	-0.446882	0.209521	-0.0801585	-0.102165	0.0706298	0.141389	0.00960821	0.286962	0.310169	0.0611855	-0.0512371	-0.0457711	0.206254	-0.463755	0.0737624	-0.0560825
ACTIVATED_POINT_MUTANTS_OF_FGFR2	0.0465498	0.175889	0.229681	0.121162	0.242944	0.139717	-0.119838	0.121017	0.0293355	-0.0680195	-0.0077402	-0.268685	0.0143296	-0.136864	-0.165163	0.19319	0.0195622	-0.173072	0.133113	0.0105154	0.181345	-0.128291	0.387318	-0.212263	0.258558	0.123904	-0.256224	0.175813	-0.317967	-0.299721	-0.0306664	0.0425684	-0.106155	-0.148347	0.366979	0.41491	-0.0110218	0.0692119	-0.092683	0.375455	0.196753	0.133757	0.105245	-0.0454238	-0.33152	0.0478591	-0.067059	0.0459679	-0.233433
PHOSPHOLIPID_METABOLISM	-0.00505477	0.0517297	-0.0204027	-0.0528058	0.0974672	0.0454122	-0.0781304	-0.0808313	0.112397	-0.0475221	-0.031007	-0.141202	-0.0210594	-0.0716629	-0.0244842	-0.0575923	0.117524	-0.0562819	0.0615238	-0.0184638	-0.185513	-0.0316291	-0.0520536	0.071354	0.104376	0.112309	-0.0882353	0.222233	-0.20934	9.53e-05	0.0546553	0.205376	-0.132559	0.00140024	-0.0651177	0.0192917	-0.0840622	-0.110961	-0.00103316	0.0892273	-0.0264894	-0.0309274	-0.0555167	0.0165111	-0.146602	-0.0671332	-0.164266	-0.159864	0.0595599
CS_DS_DEGRADATION	-0.153235	0.0143571	-0.271508	-0.0602779	-0.0619688	-0.0173902	0.42444	0.431521	0.152998	0.0357846	-0.17623	-0.356183	-0.105521	-0.0578745	0.0441633	0.372909	-0.0378171	-0.276533	0.10511	-0.487325	0.45299	0.0691502	0.326386	-0.317553	0.337091	-0.0184597	-0.00177643	0.459969	-0.0207313	-0.213377	-0.259392	-0.0224878	0.447802	0.285493	0.1641	0.146308	-0.413965	-0.0688445	0.0190694	0.290809	0.279423	0.0117353	0.127391	0.548059	-0.384667	-0.250612	-0.0895889	0.258848	-0.139011
[truncated: 13,119 more rows]
[truncated: 6 more columns]
