# Supplementary material for: DNAH10 mutation correlates with cisplatin sensitivity and tumor mutation burden in small-cell lung cancer
Source: Aging (Albany NY). 2020 Jan 20;12(2):1285–303. doi: 10.18632/aging.102683 (PMC7053592; doi:10.18632/aging.102683)
Supplement: Supplementary Table 7 [file aging-12-102683-s006..xlsx]

## Sheet: Suppl Table 7
Pathway	U_p.value
GO_ASYMMETRIC_GLUTAMATERGIC_EXCITATORY_SYNAPSE	4.84e-05
GO_NEGATIVE_REGULATION_OF_PROTEIN_DEPHOSPHORYLATION	0.000740476
REACTOME_SPRY_REGULATION_OF_FGF_SIGNALING	0.000969967
GO_EYE_PHOTORECEPTOR_CELL_DEVELOPMENT	0.00137347
REACTOME_MRNA_DECAY_BY_3_TO_5_EXORIBONUCLEASE	0.00208263
GO_NEGATIVE_REGULATION_OF_ORGAN_GROWTH	0.00208263
HAHTOLA_CTCL_PATHOGENESIS	0.00244648
BAKER_HEMATOPOESIS_STAT5_TARGETS	0.00286521
GO_NEGATIVE_REGULATION_OF_NEUROTRANSMITTER_TRANSPORT	0.00286521
BILANGES_SERUM_RESPONSE_TRANSLATION	0.00309727
GO_L_ORNITHINE_TRANSMEMBRANE_TRANSPORTER_ACTIVITY	0.00309727
GO_TENDON_DEVELOPMENT	0.00334568
GO_PRESYNAPTIC_MEMBRANE_ORGANIZATION	0.00334568
GO_PRESYNAPTIC_MEMBRANE_ASSEMBLY	0.00334568
GO_CYTIDYLYLTRANSFERASE_ACTIVITY	0.00334568
TERAMOTO_OPN_TARGETS_CLUSTER_5	0.00361139
GO_NEGATIVE_REGULATION_OF_CELL_DEVELOPMENT	0.00361139
GO_ORNITHINE_TRANSPORT	0.00361139
GO_EYE_PHOTORECEPTOR_CELL_DIFFERENTIATION	0.00389542
GO_REGULATION_OF_MUSCLE_CELL_DIFFERENTIATION	0.00389542
GO_POSITIVE_REGULATION_OF_OXIDATIVE_STRESS_INDUCED_CELL_DEATH	0.00389542
GO_REGULATION_OF_SYNAPTIC_VESICLE_RECYCLING	0.00389542
GO_INTERMEDIATE_FILAMENT_BASED_PROCESS	0.0041988
GO_RNA_STEM_LOOP_BINDING	0.00452265
GO_IMMUNOGLOBULIN_PRODUCTION_INVOLVED_IN_IMMUNOGLOBULIN_MEDIATED_IMMUNE_RESPONSE	0.0048681
MARSHALL_VIRAL_INFECTION_RESPONSE_DN	0.00523635
GO_OPIOID_RECEPTOR_SIGNALING_PATHWAY	0.00523635
GO_REGULATION_OF_STRIATED_MUSCLE_CELL_DIFFERENTIATION	0.00562862
REACTOME_NEGATIVE_REGULATION_OF_FGFR_SIGNALING	0.00604622
KYNG_RESPONSE_TO_H2O2_VIA_ERCC6_DN	0.00604622
GO_SULFUR_AMINO_ACID_CATABOLIC_PROCESS	0.00604622
GO_COMMISSURAL_NEURON_AXON_GUIDANCE	0.00604622
PID_ARF6_PATHWAY	0.00649047
GO_NEGATIVE_REGULATION_OF_RETINOIC_ACID_RECEPTOR_SIGNALING_PATHWAY	0.00649047
GO_NEGATIVE_REGULATION_OF_AXONOGENESIS	0.00649047
GO_OPIOID_RECEPTOR_ACTIVITY	0.00649047
GO_PEPTIDOGLYCAN_MURALYTIC_ACTIVITY	0.00649047
KEGG_LONG_TERM_DEPRESSION	0.00696279
ZHAN_MULTIPLE_MYELOMA_CD1_UP	0.00696279
JIANG_TIP30_TARGETS_DN	0.00696279
GO_GUANOSINE_CONTAINING_COMPOUND_BIOSYNTHETIC_PROCESS	0.00696279
GO_NUCLEOTIDASE_ACTIVITY	0.00696279
GO_THIOREDOXIN_PEROXIDASE_ACTIVITY	0.00696279
BOYAULT_LIVER_CANCER_SUBCLASS_G23_DN	0.0074646
GO_PROTEIN_PHOSPHATASE_TYPE_2A_COMPLEX	0.0074646
GO_NUCLEOSIDE_MONOPHOSPHATE_CATABOLIC_PROCESS	0.0074646
GO_NEGATIVE_REGULATION_OF_INTERLEUKIN_5_PRODUCTION	0.0074646
GO_CARDIAC_MUSCLE_CELL_ACTION_POTENTIAL_INVOLVED_IN_CONTRACTION	0.0074646
GO_HOST_CELL_PART	0.0074646
GO_NEGATIVE_REGULATION_OF_DEVELOPMENTAL_GROWTH	0.00799742
GO_CARDIAC_MUSCLE_CELL_CONTRACTION	0.00799742
GO_ACTIN_MEDIATED_CELL_CONTRACTION	0.00799742
GO_REGULATION_OF_PHOSPHOPROTEIN_PHOSPHATASE_ACTIVITY	0.00799742
GO_REGULATION_OF_HISTONE_H3_K9_ACETYLATION	0.00799742
GO_AMPA_GLUTAMATE_RECEPTOR_COMPLEX	0.00799742
GO_HISTONE_H3_K9_ACETYLATION	0.00799742
GO_THROMBIN_ACTIVATED_RECEPTOR_SIGNALING_PATHWAY	0.00799742
HASLINGER_B_CLL_WITH_17P13_DELETION	0.00856278
GO_RETINOIC_ACID_RECEPTOR_SIGNALING_PATHWAY	0.00856278
GO_POSITIVE_REGULATION_OF_INTEGRIN_ACTIVATION	0.00856278
GO_RECEPTOR_DIFFUSION_TRAPPING	0.00856278
GO_EUKARYOTIC_TRANSLATION_INITIATION_FACTOR_4F_COMPLEX	0.00856278
GO_HOST_INTRACELLULAR_PART	0.00856278
GO_PHOTORECEPTOR_CELL_DEVELOPMENT	0.0091623
GO_PROTEIN_SERINE_THREONINE_PHOSPHATASE_COMPLEX	0.0091623
REACTOME_CGMP_EFFECTS	0.00979765
DING_LUNG_CANCER_MUTATED_FREQUENTLY	0.00979765
GO_REGULATION_OF_T_CELL_CHEMOTAXIS	0.00979765
GO_SULFUR_COMPOUND_CATABOLIC_PROCESS	0.00979765
GO_PHOTORECEPTOR_CELL_DIFFERENTIATION	0.00979765
GO_AXONAL_FASCICULATION	0.00979765
GO_NEUROPEPTIDE_SIGNALING_PATHWAY	0.00979765
GO_PHOSPHATASE_REGULATOR_ACTIVITY	0.00979765
GO_CYTOKINE_PRODUCTION_INVOLVED_IN_INFLAMMATORY_RESPONSE	0.00979765
GO_BRAINSTEM_DEVELOPMENT	0.00979765
GO_VOLTAGE_GATED_POTASSIUM_CHANNEL_ACTIVITY_INVOLVED_IN_CARDIAC_MUSCLE_CELL_ACTION_POTENTIAL_REPOLARIZATION	0.00979765
SHIN_B_CELL_LYMPHOMA_CLUSTER_2	0.0104705
GO_COFACTOR_CATABOLIC_PROCESS	0.0104705
GO_POSITIVE_REGULATION_OF_CHROMATIN_BINDING	0.0104705
REACTOME_TRANSPORT_OF_ORGANIC_ANIONS	0.0111828
BOGNI_TREATMENT_RELATED_MYELOID_LEUKEMIA_UP	0.0111828
TERAMOTO_OPN_TARGETS_CLUSTER_1	0.0111828
MAEKAWA_ATF2_TARGETS	0.0111828
GO_RECEPTOR_INTERNALIZATION	0.0111828
GO_GLUTATHIONE_CATABOLIC_PROCESS	0.0111828
GO_AGGREPHAGY	0.0111828
GO_NEGATIVE_REGULATION_OF_HISTONE_H3_K9_TRIMETHYLATION	0.0111828
GAUSSMANN_MLL_AF4_FUSION_TARGETS_B_DN	0.0119361
MAGRANGEAS_MULTIPLE_MYELOMA_IGLL_VS_IGLK_UP	0.0119361
LEE_CALORIE_RESTRICTION_NEOCORTEX_UP	0.0119361
GO_POSITIVE_REGULATION_OF_NEURAL_PRECURSOR_CELL_PROLIFERATION	0.0119361
GO_POSITIVE_REGULATION_OF_GLUCONEOGENESIS_BY_POSITIVE_REGULATION_OF_TRANSCRIPTION_FROM_RNA_POLYMERASE_II_PROMOTER	0.0119361
GO_REGULATION_OF_MUCUS_SECRETION	0.0119361
GO_M7G_5_PPPN_DIPHOSPHATASE_ACTIVITY	0.0119361
LANDIS_ERBB2_BREAST_TUMORS_65_DN	0.0127325
OUYANG_PROSTATE_CANCER_PROGRESSION_DN	0.0127325
GO_NEURON_RECOGNITION	0.0127325
GO_NEGATIVE_REGULATION_OF_NEURON_DIFFERENTIATION	0.0127325
GO_ACTIN_FILAMENT_BASED_MOVEMENT	0.0127325
GO_POSITIVE_REGULATION_OF_MEIOTIC_CELL_CYCLE	0.0127325
GO_BOX_C_D_SNORNP_ASSEMBLY	0.0127325
GO_FOREBRAIN_VENTRICULAR_ZONE_PROGENITOR_CELL_DIVISION	0.0127325
GO_NEURAL_PLATE_REGIONALIZATION	0.0127325
GO_MACROPHAGE_PROLIFERATION	0.0127325
GO_MICROGLIAL_CELL_PROLIFERATION	0.0127325
GO_NUCLEOTIDE_DIPHOSPHATASE_ACTIVITY	0.0127325
GO_VOLTAGE_GATED_POTASSIUM_CHANNEL_ACTIVITY_INVOLVED_IN_VENTRICULAR_CARDIAC_MUSCLE_CELL_ACTION_POTENTIAL_REPOLARIZATION	0.0127325
REACTOME_ERK_MAPK_TARGETS	0.0135739
REACTOME_PLATELET_SENSITIZATION_BY_LDL	0.0135739
REACTOME_DESTABILIZATION_OF_MRNA_BY_KSRP	0.0135739
WILCOX_RESPONSE_TO_PROGESTERONE_UP	0.0135739
GO_N_ACETYLGLUCOSAMINE_METABOLIC_PROCESS	0.0135739
GO_DNA_UNWINDING_INVOLVED_IN_DNA_REPLICATION	0.0135739
GO_LIPID_GLYCOSYLATION	0.0135739
GO_INHIBITORY_POSTSYNAPTIC_POTENTIAL	0.0135739
GO_NEGATIVE_REGULATION_OF_CELL_GROWTH_INVOLVED_IN_CARDIAC_MUSCLE_CELL_DEVELOPMENT	0.0135739
GO_HOST_CELL_CYTOPLASM	0.0135739
ST_G_ALPHA_I_PATHWAY	0.0144624
MCBRYAN_PUBERTAL_BREAST_4_5WK_DN	0.0144624
ANASTASSIOU_MULTICANCER_INVASIVENESS_SIGNATURE	0.0144624
GO_RESPONSE_TO_AXON_INJURY	0.0144624
GO_ACTIVATION_INDUCED_CELL_DEATH_OF_T_CELLS	0.0144624
GO_PROTEIN_K29_LINKED_DEUBIQUITINATION	0.0144624
GO_TYPE_I_INTERFERON_SECRETION	0.0144624
GO_POSITIVE_REGULATION_OF_HISTONE_H3_K9_ACETYLATION	0.0144624
GO_THROMBIN_ACTIVATED_RECEPTOR_ACTIVITY	0.0144624
GO_STRUCTURAL_CONSTITUENT_OF_PRESYNAPSE	0.0144624
REACTOME_DESTABILIZATION_OF_MRNA_BY_TRISTETRAPROLIN_TTP	0.0153999
TAKEDA_TARGETS_OF_NUP98_HOXA9_FUSION_16D_DN	0.0153999
GO_NEGATIVE_REGULATION_OF_NERVOUS_SYSTEM_DEVELOPMENT	0.0153999
GO_REGULATION_OF_EXTRINSIC_APOPTOTIC_SIGNALING_PATHWAY_IN_ABSENCE_OF_LIGAND	0.0153999
GO_AUDITORY_RECEPTOR_CELL_FATE_COMMITMENT	0.0153999
GO_REGULATION_OF_SEROTONIN_SECRETION	0.0153999
GO_POLYSACCHARIDE_DIGESTION	0.0153999
GO_PRE_SNORNP_COMPLEX	0.0153999
ABE_INNER_EAR	0.0163885
NABA_PROTEOGLYCANS	0.0163885
GO_NEGATIVE_REGULATION_OF_POTASSIUM_ION_TRANSPORT	0.0163885
GO_NEGATIVE_REGULATION_OF_MEIOTIC_CELL_CYCLE	0.0163885
GO_RECEPTOR_MEDIATED_ENDOCYTOSIS	0.0163885
GO_REGULATION_OF_NEURAL_PRECURSOR_CELL_PROLIFERATION	0.0163885
GO_MCM_COMPLEX	0.0163885
GO_SYNAPTIC_VESICLE_BUDDING_FROM_PRESYNAPTIC_ENDOCYTIC_ZONE_MEMBRANE	0.0163885
GO_POSITIVE_REGULATION_OF_TRANSMISSION_OF_NERVE_IMPULSE	0.0163885
GO_REGULATION_OF_CELL_GROWTH_INVOLVED_IN_CARDIAC_MUSCLE_CELL_DEVELOPMENT	0.0163885
GO_DENTINOGENESIS	0.0163885
PID_S1P_S1P1_PATHWAY	0.0174306
REACTOME_FORMATION_OF_THE_TERNARY_COMPLEX_AND_SUBSEQUENTLY_THE_43S_COMPLEX	0.0174306
OXFORD_RALA_TARGETS_DN	0.0174306
CAMPS_COLON_CANCER_COPY_NUMBER_DN	0.0174306
ACEVEDO_LIVER_CANCER_WITH_H3K9ME3_DN	0.0174306
GO_REGULATION_OF_RECEPTOR_INTERNALIZATION	0.0174306
GO_NEGATIVE_REGULATION_OF_CELL_MORPHOGENESIS_INVOLVED_IN_DIFFERENTIATION	0.0174306
GO_REGULATION_OF_PROTEIN_AUTOPHOSPHORYLATION	0.0174306
GO_ACTIVIN_BINDING	0.0174306
GO_REGULATION_OF_MITOCHONDRIAL_FUSION	0.0174306
GO_NEGATIVE_REGULATION_OF_NEURON_PROJECTION_DEVELOPMENT	0.0174306
GO_SENSORY_SYSTEM_DEVELOPMENT	0.0174306
KEGG_TGF_BETA_SIGNALING_PATHWAY	0.0185283
REACTOME_POST_TRANSLATIONAL_MODIFICATION_SYNTHESIS_OF_GPI_ANCHORED_PROTEINS	0.0185283
REACTOME_KINESINS	0.0185283
GO_SODIUM_INDEPENDENT_ORGANIC_ANION_TRANSPORT	0.0185283
GO_REGULATION_OF_NEURON_PROJECTION_REGENERATION	0.0185283
GO_L_SERINE_CATABOLIC_PROCESS	0.0185283
GO_NEGATIVE_REGULATION_OF_MONOCYTE_DIFFERENTIATION	0.0185283
GO_POSITIVE_REGULATION_OF_POSTSYNAPTIC_MEMBRANE_ORGANIZATION	0.0185283
GO_NEGATIVE_REGULATION_OF_CELL_CYCLE_CHECKPOINT	0.0185283
GO_CATSPER_COMPLEX	0.0185283
GO_HEME_TRANSPORTER_ACTIVITY	0.0185283
MCBRYAN_PUBERTAL_BREAST_6_7WK_UP	0.0196839
SASSON_FSH_RESPONSE	0.0196839
VALK_AML_CLUSTER_11	0.0196839
GO_RESPONSE_TO_ETHANOL	0.0196839
GO_REGULATION_OF_SHORT_TERM_NEURONAL_SYNAPTIC_PLASTICITY	0.0196839
GO_REGULATION_OF_RETINOIC_ACID_RECEPTOR_SIGNALING_PATHWAY	0.0196839
GO_HYDROLASE_ACTIVITY_ACTING_ON_CARBON_NITROGEN_BUT_NOT_PEPTIDE_BONDS_IN_LINEAR_AMIDES	0.0196839
GO_GERM_CELL_MIGRATION	0.0196839
GO_NEGATIVE_REGULATION_OF_EXCITATORY_POSTSYNAPTIC_POTENTIAL	0.0196839
GO_REGULATION_OF_SYNAPTIC_VESICLE_ENDOCYTOSIS	0.0196839
GO_EXTRINSIC_COMPONENT_OF_PRESYNAPTIC_MEMBRANE	0.0196839
BIOCARTA_RANKL_PATHWAY	0.0208997
REACTOME_VEGF_LIGAND_RECEPTOR_INTERACTIONS	0.0208997
OXFORD_RALA_OR_RALB_TARGETS_DN	0.0208997
AMIT_EGF_RESPONSE_20_HELA	0.0208997
BAFNA_MUC4_TARGETS_DN	0.0208997
GO_NEGATIVE_REGULATION_OF_MUSCLE_CELL_DIFFERENTIATION	0.0208997
GO_NEURON_CELL_CELL_ADHESION	0.0208997
GO_INTERSTITIAL_MATRIX	0.0208997
GO_PLASMA_MEMBRANE_REPAIR	0.0208997
GO_N_TERMINAL_PROTEIN_LIPIDATION	0.0208997
GO_SEROTONIN_TRANSPORT	0.0208997
GO_NEGATIVE_REGULATION_OF_HISTONE_H3_K9_METHYLATION	0.0208997
GO_FATTY_ACID_TRANSMEMBRANE_TRANSPORT	0.0208997
REACTOME_DESTABILIZATION_OF_MRNA_BY_BRF1	0.0221783
GO_GLUCOSAMINE_CONTAINING_COMPOUND_METABOLIC_PROCESS	0.0221783
GO_RRNA_CATABOLIC_PROCESS	0.0221783
GO_NEGATIVE_REGULATION_OF_SIGNAL_TRANSDUCTION_IN_ABSENCE_OF_LIGAND	0.0221783
GO_NEGATIVE_REGULATION_OF_CARDIAC_MUSCLE_TISSUE_GROWTH	0.0221783
GO_SYMPATHETIC_GANGLION_DEVELOPMENT	0.0221783
GO_POSITIVE_REGULATION_OF_LYMPHOCYTE_CHEMOTAXIS	0.0221783
GO_REGION_OF_CYTOSOL	0.0221783
GO_DYNEIN_HEAVY_CHAIN_BINDING	0.0221783
PID_EPHA_FWDPATHWAY	0.0235219
LEE_TARGETS_OF_PTCH1_AND_SUFU_UP	0.0235219
CHESLER_BRAIN_QTL_TRANS	0.0235219
JOHNSTONE_PARVB_TARGETS_2_UP	0.0235219
GO_EYE_MORPHOGENESIS	0.0235219
GO_TRANS_GOLGI_NETWORK_TRANSPORT_VESICLE	0.0235219
GO_PROTEIN_PHOSPHATASE_1_BINDING	0.0235219
GO_MAINTENANCE_OF_CENTROSOME_LOCATION	0.0235219
GO_POSITIVE_REGULATION_OF_UTERINE_SMOOTH_MUSCLE_CONTRACTION	0.0235219
GO_AP_1_ADAPTOR_COMPLEX	0.0235219
GO_MAP_KINASE_SCAFFOLD_ACTIVITY	0.0235219
GO_INTRACELLULAR_CGMP_ACTIVATED_CATION_CHANNEL_ACTIVITY	0.0235219
KEGG_THYROID_CANCER	0.0249333
REACTOME_NUCLEAR_EVENTS_KINASE_AND_TRANSCRIPTION_FACTOR_ACTIVATION	0.0249333
OHASHI_AURKA_TARGETS	0.0249333
TESAR_ALK_TARGETS_HUMAN_ES_5D_DN	0.0249333
YU_MYC_TARGETS_UP	0.0249333
KYNG_WERNER_SYNDROM_DN	0.0249333
ZEMBUTSU_SENSITIVITY_TO_FLUOROURACIL	0.0249333
SERVITJA_LIVER_HNF1A_TARGETS_UP	0.0249333
GO_REGULATION_OF_ISOTYPE_SWITCHING	0.0249333
GO_NEGATIVE_REGULATION_OF_MYOSIN_LIGHT_CHAIN_PHOSPHATASE_ACTIVITY	0.0249333
GO_TERMINAL_BUTTON_ORGANIZATION	0.0249333
GO_ATRIAL_CARDIAC_MUSCLE_CELL_TO_AV_NODE_CELL_SIGNALING	0.0249333
GO_POSTSYNAPTIC_MEMBRANE_ASSEMBLY	0.0249333
GO_PROTEIN_ANTIGEN_BINDING	0.0249333
PID_IL8_CXCR2_PATHWAY	0.0264149
MULLIGHAN_NPM1_MUTATED_SIGNATURE_2_UP	0.0264149
ZHENG_RESPONSE_TO_ARSENITE_DN	0.0264149
MARCHINI_TRABECTEDIN_RESISTANCE_DN	0.0264149
MOOTHA_GLUCONEOGENESIS	0.0264149
GO_MUSCLE_ORGAN_DEVELOPMENT	0.0264149
GO_REGULATION_OF_CARDIAC_MUSCLE_TISSUE_DEVELOPMENT	0.0264149
GO_NEGATIVE_REGULATION_OF_STRIATED_MUSCLE_CELL_DIFFERENTIATION	0.0264149
GO_REGULATION_OF_MESODERM_DEVELOPMENT	0.0264149
GO_REGULATION_OF_ACTIN_FILAMENT_BASED_MOVEMENT	0.0264149
GO_POSITIVE_REGULATION_OF_NITRIC_OXIDE_SYNTHASE_ACTIVITY	0.0264149
GO_POSITIVE_REGULATION_OF_NEURON_APOPTOTIC_PROCESS	0.0264149
GO_NUCLEOBASE_CONTAINING_SMALL_MOLECULE_BIOSYNTHETIC_PROCESS	0.0264149
GO_REGULATION_OF_PROTEIN_DEPHOSPHORYLATION	0.0264149
GO_REGULATION_OF_NODAL_SIGNALING_PATHWAY_INVOLVED_IN_DETERMINATION_OF_LEFT_RIGHT_ASYMMETRY	0.0264149
GO_SYMMETRIC_SYNAPSE	0.0264149
GO_EXTRACELLULAR_MEMBRANE_BOUNDED_ORGANELLE	0.0264149
GO_INTRACELLULAR_CAMP_ACTIVATED_CATION_CHANNEL_ACTIVITY	0.0264149
PID_ERA_GENOMIC_PATHWAY	0.0279693
REACTOME_REGULATED_PROTEOLYSIS_OF_P75NTR	0.0279693
PETRETTO_BLOOD_PRESSURE_DN	0.0279693
FIGUEROA_AML_METHYLATION_CLUSTER_1_DN	0.0279693
GO_SKELETAL_MUSCLE_TISSUE_REGENERATION	0.0279693
GO_REGULATION_OF_NEURON_MIGRATION	0.0279693
GO_RENAL_CONTROL_OF_PERIPHERAL_VASCULAR_RESISTANCE_INVOLVED_IN_REGULATION_OF_SYSTEMIC_ARTERIAL_BLOOD_PRESSURE	0.0279693
GO_RESPONSE_TO_PEPTIDOGLYCAN	0.0279693
GO_POSITIVE_REGULATION_OF_PEROXISOME_PROLIFERATOR_ACTIVATED_RECEPTOR_SIGNALING_PATHWAY	0.0279693
GO_NEGATIVE_REGULATION_OF_G_PROTEIN_COUPLED_RECEPTOR_SIGNALING_PATHWAY	0.0279693
GO_NEGATIVE_REGULATION_OF_AMINO_ACID_TRANSPORT	0.0279693
MULLIGHAN_NPM1_MUTATED_SIGNATURE_1_DN	0.0295993
XU_HGF_SIGNALING_NOT_VIA_AKT1_48HR_DN	0.0295993
AGUIRRE_PANCREATIC_CANCER_COPY_NUMBER_DN	0.0295993
GO_RESPONSE_TO_INACTIVITY	0.0295993
GO_NUCLEOSIDE_PHOSPHATE_CATABOLIC_PROCESS	0.0295993
GO_GOLGI_ORGANIZATION	0.0295993
GO_NOREPINEPHRINE_BIOSYNTHETIC_PROCESS	0.0295993
GO_NEUROTRANSMITTER_GATED_ION_CHANNEL_CLUSTERING	0.0295993
GO_POSITIVE_REGULATION_OF_HISTONE_H4_ACETYLATION	0.0295993
GO_REGULATION_OF_COLLAGEN_FIBRIL_ORGANIZATION	0.0295993
GO_NEGATIVE_REGULATION_OF_NEURON_MIGRATION	0.0295993
REACTOME_REGULATION_OF_HYPOXIA_INDUCIBLE_FACTOR_HIF_BY_OXYGEN	0.0313076
REACTOME_G_ALPHA_I_SIGNALLING_EVENTS	0.0313076
JAZAG_TGFB1_SIGNALING_VIA_SMAD4_DN	0.0313076
STARK_HYPPOCAMPUS_22Q11_DELETION_DN	0.0313076
CUI_TCF21_TARGETS_UP	0.0313076
KUNINGER_IGF1_VS_PDGFB_TARGETS_UP	0.0313076
DE_YY1_TARGETS_UP	0.0313076
NIELSEN_LEIOMYOSARCOMA_DN	0.0313076
GO_AXON_REGENERATION	0.0313076
GO_RHYTHMIC_PROCESS	0.0313076
GO_NEUROTRANSMITTER_SODIUM_SYMPORTER_ACTIVITY	0.0313076
GO_PEPTIDE_RECEPTOR_ACTIVITY	0.0313076
GO_PROTEIN_LOCALIZATION_TO_PARANODE_REGION_OF_AXON	0.0313076
GO_T_CELL_CHEMOTAXIS	0.0313076
GO_POSITIVE_REGULATION_OF_HISTONE_PHOSPHORYLATION	0.0313076
GO_RETINAL_CONE_CELL_DIFFERENTIATION	0.0313076
GO_MAINTENANCE_OF_PRESYNAPTIC_ACTIVE_ZONE_STRUCTURE	0.0313076
GO_MITOCHONDRIAL_RIBOSOME_ASSEMBLY	0.0313076
GO_NEGATIVE_REGULATION_OF_GLUCAGON_SECRETION	0.0313076
REACTOME_SYNTHESIS_OF_PA	0.0330969
REACTOME_ERKS_ARE_INACTIVATED	0.0330969
REACTOME_ADVANCED_GLYCOSYLATION_ENDPRODUCT_RECEPTOR_SIGNALING	0.0330969
BARRIER_CANCER_RELAPSE_TUMOR_SAMPLE_UP	0.0330969
HOWLIN_CITED1_TARGETS_1_DN	0.0330969
GO_POSITIVE_REGULATION_OF_ACTIVATED_T_CELL_PROLIFERATION	0.0330969
GO_REGULATION_OF_BLOOD_VOLUME_BY_RENIN_ANGIOTENSIN	0.0330969
GO_REGULATION_OF_MUSCLE_ADAPTATION	0.0330969
GO_UDP_GALACTOSYLTRANSFERASE_ACTIVITY	0.0330969
GO_PHOSPHATASE_INHIBITOR_ACTIVITY	0.0330969
GO_TITIN_BINDING	0.0330969
GO_LUTEOLYSIS	0.0330969
GO_REGULATION_OF_BRANCHING_INVOLVED_IN_LUNG_MORPHOGENESIS	0.0330969
GO_REGULATION_OF_DNA_DEMETHYLATION	0.0330969
GO_PROTEIN_LOCALIZATION_TO_CELL_JUNCTION	0.0330969
GO_NEGATIVE_REGULATION_OF_VASCULAR_SMOOTH_MUSCLE_CELL_DIFFERENTIATION	0.0330969
GO_EXTRINSIC_COMPONENT_OF_ENDOPLASMIC_RETICULUM_MEMBRANE	0.0330969
GO_MITOGEN_ACTIVATED_PROTEIN_KINASE_P38_BINDING	0.0330969
ST_TYPE_I_INTERFERON_PATHWAY	0.0349701
REACTOME_P2Y_RECEPTORS	0.0349701
MULLIGHAN_NPM1_SIGNATURE_3_DN	0.0349701
NAKAMURA_BRONCHIAL_AND_BRONCHIOLAR_EPITHELIA	0.0349701
ROSS_AML_WITH_PML_RARA_FUSION	0.0349701
IGLESIAS_E2F_TARGETS_DN	0.0349701
GEISS_RESPONSE_TO_DSRNA_DN	0.0349701
GO_REGULATION_OF_VOLTAGE_GATED_CALCIUM_CHANNEL_ACTIVITY	0.0349701
GO_NEGATIVE_REGULATION_OF_MEIOTIC_NUCLEAR_DIVISION	0.0349701
GO_SPERM_MOTILITY	0.0349701
GO_CAMERA_TYPE_EYE_PHOTORECEPTOR_CELL_DIFFERENTIATION	0.0349701
GO_OLIGOSACCHARIDE_BIOSYNTHETIC_PROCESS	0.0349701
GO_REGULATION_OF_GUANYLATE_CYCLASE_ACTIVITY	0.0349701
GO_POSITIVE_REGULATION_OF_B_CELL_DIFFERENTIATION	0.0349701
GO_LOCALIZATION_WITHIN_MEMBRANE	0.0349701
GO_PEPTIDYL_LYSINE_DIMETHYLATION	0.0349701
GO_NEGATIVE_REGULATION_OF_T_CELL_CYTOKINE_PRODUCTION	0.0349701
GO_NEURONAL_ACTION_POTENTIAL_PROPAGATION	0.0349701
GO_RAP_PROTEIN_SIGNAL_TRANSDUCTION	0.0349701
BIOCARTA_CARM_ER_PATHWAY	0.0369301
REACTOME_TERMINATION_OF_O_GLYCAN_BIOSYNTHESIS	0.0369301
REACTOME_G_BETA_GAMMA_SIGNALLING_THROUGH_PLC_BETA	0.0369301
LINDGREN_BLADDER_CANCER_CLUSTER_2A_DN	0.0369301
MUELLER_METHYLATED_IN_GLIOBLASTOMA	0.0369301
JOHANSSON_BRAIN_CANCER_EARLY_VS_LATE_UP	0.0369301
STONER_ESOPHAGEAL_CARCINOGENESIS_UP	0.0369301
KUMAMOTO_RESPONSE_TO_NUTLIN_3A_DN	0.0369301
GO_HOMOCYSTEINE_METABOLIC_PROCESS	0.0369301
GO_NITRIC_OXIDE_SYNTHASE_BINDING	0.0369301
GO_CARNITINE_SHUTTLE	0.0369301
GO_MEIOTIC_CELL_CYCLE_PHASE_TRANSITION	0.0369301
GO_PROTEIN_LOCALIZATION_TO_JUXTAPARANODE_REGION_OF_AXON	0.0369301
GO_MEMBRANE_REPOLARIZATION_DURING_VENTRICULAR_CARDIAC_MUSCLE_CELL_ACTION_POTENTIAL	0.0369301
KEGG_VASCULAR_SMOOTH_MUSCLE_CONTRACTION	0.0389797
REACTOME_DEVELOPMENTAL_BIOLOGY	0.0389797
REACTOME_IRAK2_MEDIATED_ACTIVATION_OF_TAK1_COMPLEX_UPON_TLR7_8_OR_9_STIMULATION	0.0389797
NUNODA_RESPONSE_TO_DASATINIB_IMATINIB_DN	0.0389797
NAKAYAMA_FRA2_TARGETS	0.0389797
AMIT_EGF_RESPONSE_40_MCF10A	0.0389797
FERRANDO_HOX11_NEIGHBORS	0.0389797
GO_L_ALPHA_AMINO_ACID_TRANSMEMBRANE_TRANSPORT	0.0389797
GO_RNA_SURVEILLANCE	0.0389797
GO_ORGANIC_ACID_TRANSMEMBRANE_TRANSPORT	0.0389797
GO_SCHWANN_CELL_DEVELOPMENT	0.0389797
GO_CYTOSOLIC_SMALL_RIBOSOMAL_SUBUNIT	0.0389797
GO_SKELETAL_MUSCLE_SATELLITE_CELL_ACTIVATION	0.0389797
GO_LEUKOCYTE_TETHERING_OR_ROLLING	0.0389797
GO_NEGATIVE_REGULATION_OF_DENDRITIC_SPINE_MORPHOGENESIS	0.0389797
GO_NEGATIVE_REGULATION_OF_NEURON_PROJECTION_REGENERATION	0.0389797
GO_REGULATION_OF_FLAGELLATED_SPERM_MOTILITY	0.0389797
GO_REGULATION_OF_AEROBIC_RESPIRATION	0.0389797
GO_REGULATION_OF_LYSOSOMAL_PROTEIN_CATABOLIC_PROCESS	0.0389797
GO_EXTRINSIC_COMPONENT_OF_SYNAPTIC_MEMBRANE	0.0389797
REACTOME_NUCLEOTIDE_LIKE_PURINERGIC_RECEPTORS	0.0411219
TOMIDA_METASTASIS_UP	0.0411219
ROSS_ACUTE_MYELOID_LEUKEMIA_CBF	0.0411219
FONTAINE_FOLLICULAR_THYROID_ADENOMA_DN	0.0411219
GO_POSITIVE_REGULATION_OF_NEURON_DEATH	0.0411219
GO_REGULATION_OF_MEIOTIC_CELL_CYCLE	0.0411219
GO_POSITIVE_REGULATION_OF_NON_CANONICAL_WNT_SIGNALING_PATHWAY	0.0411219
GO_PRESYNAPTIC_MEMBRANE	0.0411219
GO_REGULATION_OF_THE_FORCE_OF_HEART_CONTRACTION_BY_CHEMICAL_SIGNAL	0.0411219
GO_ALDITOL_CATABOLIC_PROCESS	0.0411219
GO_NEGATIVE_REGULATION_OF_NEUROTRANSMITTER_UPTAKE	0.0411219
GO_PRIMITIVE_HEMOPOIESIS	0.0411219
GO_CELLULAR_RESPONSE_TO_CAFFEINE	0.0411219
GO_L_LYSINE_TRANSPORT	0.0411219
GO_CARNITINE_O_ACYLTRANSFERASE_ACTIVITY	0.0411219
KEGG_GLYCOSYLPHOSPHATIDYLINOSITOL_GPI_ANCHOR_BIOSYNTHESIS	0.0433597
REACTOME_PERK_REGULATED_GENE_EXPRESSION	0.0433597
JAEGER_METASTASIS_UP	0.0433597
HAHTOLA_MYCOSIS_FUNGOIDES_UP	0.0433597
AGARWAL_AKT_PATHWAY_TARGETS	0.0433597
LIEN_BREAST_CARCINOMA_METAPLASTIC	0.0433597
MA_MYELOID_DIFFERENTIATION_UP	0.0433597
SESTO_RESPONSE_TO_UV_C6	0.0433597
MILI_PSEUDOPODIA_CHEMOTAXIS_UP	0.0433597
BOYLAN_MULTIPLE_MYELOMA_PCA3_UP	0.0433597
GO_POSITIVE_REGULATION_OF_MITOTIC_NUCLEAR_DIVISION	0.0433597
GO_NEGATIVE_REGULATION_OF_AXON_EXTENSION	0.0433597
GO_MITOCHONDRIAL_DNA_METABOLIC_PROCESS	0.0433597
GO_CARDIAC_MYOFIBRIL_ASSEMBLY	0.0433597
GO_REGULATION_OF_CARDIAC_MUSCLE_CELL_DIFFERENTIATION	0.0433597
GO_REGULATION_OF_IMMUNOGLOBULIN_PRODUCTION	0.0433597
GO_GLIOGENESIS	0.0433597
GO_SIGNAL_TRANSDUCTION_IN_ABSENCE_OF_LIGAND	0.0433597
GO_NEURON_PROJECTION_REGENERATION	0.0433597
GO_SOMATIC_RECOMBINATION_OF_IMMUNOGLOBULIN_GENE_SEGMENTS	0.0433597
GO_ADP_BINDING	0.0433597
GO_GALACTOSYLTRANSFERASE_ACTIVITY	0.0433597
GO_CORECEPTOR_ACTIVITY	0.0433597
GO_ACTIVATION_OF_CYSTEINE_TYPE_ENDOPEPTIDASE_ACTIVITY_INVOLVED_IN_APOPTOTIC_PROCESS_BY_CYTOCHROME_C	0.0433597
GO_REGULATION_OF_INTEGRIN_ACTIVATION	0.0433597
GO_NUCLEAR_TRANSCRIBED_MRNA_CATABOLIC_PROCESS_EXONUCLEOLYTIC_3_5_	0.0433597
GO_MACROPINOCYTOSIS	0.0433597
GO_POSITIVE_REGULATION_OF_SMAD_PROTEIN_SIGNAL_TRANSDUCTION	0.0433597
GO_CELL_TIP	0.0433597
GO_RNA_POLYMERASE_II_GENERAL_TRANSCRIPTION_INITIATION_FACTOR_ACTIVITY	0.0433597
REACTOME_ACTIVATION_OF_GENES_BY_ATF4	0.0456961
LUI_THYROID_CANCER_CLUSTER_2	0.0456961
GO_NEGATIVE_REGULATION_OF_HISTONE_METHYLATION	0.0456961
GO_SUBSTRATE_INDEPENDENT_TELENCEPHALIC_TANGENTIAL_MIGRATION	0.0456961
GO_POSITIVE_REGULATION_OF_VASCULAR_PERMEABILITY	0.0456961
GO_REGULATION_OF_HISTONE_PHOSPHORYLATION	0.0456961
GO_CARDIAC_MUSCLE_CELL_ACTION_POTENTIAL	0.0456961
GO_NEGATIVE_REGULATION_OF_T_CELL_MEDIATED_IMMUNITY	0.0456961
GO_REGULATION_OF_TYPE_I_INTERFERON_MEDIATED_SIGNALING_PATHWAY	0.0456961
GO_NUCLEAR_UBIQUITIN_LIGASE_COMPLEX	0.0456961
GO_RNA_DIRECTED_DNA_POLYMERASE_ACTIVITY	0.0456961
GO_PROTEIN_TYROSINE_PHOSPHATASE_ACTIVITY	0.0456961
GO_PROLINE_RICH_REGION_BINDING	0.0456961
GO_NEUROPEPTIDE_BINDING	0.0456961
GO_REGULATION_OF_MYOSIN_LIGHT_CHAIN_PHOSPHATASE_ACTIVITY	0.0456961
GO_SEROTONIN_UPTAKE	0.0456961
GO_CELLULAR_RESPONSE_TO_MANGANESE_ION	0.0456961
GO_UNIPLEX_COMPLEX	0.0456961
GO_TELOMERASE_ACTIVITY	0.0456961
GO_GUANINE_THYMINE_MISPAIR_BINDING	0.0456961
KEGG_GLYCINE_SERINE_AND_THREONINE_METABOLISM	0.0481343
REACTOME_CTNNB1_PHOSPHORYLATION_CASCADE	0.0481343
REACTOME_ACTIVATION_OF_THE_MRNA_UPON_BINDING_OF_THE_CAP_BINDING_COMPLEX_AND_EIFS_AND_SUBSEQUENT_BINDING_TO_43S	0.0481343
WIKMAN_ASBESTOS_LUNG_CANCER_UP	0.0481343
DARWICHE_PAPILLOMA_RISK_HIGH_DN	0.0481343
KORKOLA_CHORIOCARCINOMA	0.0481343
NIKOLSKY_BREAST_CANCER_1Q32_AMPLICON	0.0481343
DING_LUNG_CANCER_MUTATED_SIGNIFICANTLY	0.0481343
LIANG_HEMATOPOIESIS_STEM_CELL_NUMBER_QTL	0.0481343
PYEON_CANCER_HEAD_AND_NECK_VS_CERVICAL_DN	0.0481343
NIELSEN_SCHWANNOMA_DN	0.0481343
KIM_GLIS2_TARGETS_DN	0.0481343
GO_T_CELL_HOMEOSTASIS	0.0481343
GO_REGULATION_OF_B_CELL_MEDIATED_IMMUNITY	0.0481343
GO_POSITIVE_REGULATION_OF_PEPTIDYL_THREONINE_PHOSPHORYLATION	0.0481343
GO_DNA_POLYMERASE_COMPLEX	0.0481343
GO_MYOFILAMENT	0.0481343
GO_DENDRITIC_SHAFT	0.0481343
GO_FILAMIN_BINDING	0.0481343
GO_SMALL_NUCLEOLAR_RIBONUCLEOPROTEIN_COMPLEX_ASSEMBLY	0.0481343
GO_FLOOR_PLATE_DEVELOPMENT	0.0481343
GO_REGULATION_OF_RESPONSE_TO_OSMOTIC_STRESS	0.0481343
GO_REGULATION_OF_ACTIVATION_INDUCED_CELL_DEATH_OF_T_CELLS	0.0481343
GO_VIRAL_TRANSLATIONAL_TERMINATION_REINITIATION	0.0481343
GO_POSITIVE_REGULATION_OF_MEIOTIC_CELL_CYCLE_PHASE_TRANSITION	0.0481343
GO_REGULATION_OF_SKELETAL_MUSCLE_ACETYLCHOLINE_GATED_CHANNEL_CLUSTERING	0.0481343
GO_POSITIVE_REGULATION_OF_INTERLEUKIN_5_SECRETION	0.0481343
GO_NEGATIVE_REGULATION_OF_EPITHELIAL_CELL_DIFFERENTIATION_INVOLVED_IN_KIDNEY_DEVELOPMENT	0.0481343
GO_OTHER_ORGANISM_MEMBRANE	0.0481343
GO_EXTRINSIC_COMPONENT_OF_POSTSYNAPTIC_MEMBRANE	0.0481343
GO_L_LYSINE_TRANSMEMBRANE_TRANSPORTER_ACTIVITY	0.0481343
GO_OXIDOREDUCTASE_ACTIVITY_ACTING_ON_CH_OR_CH2_GROUPS	0.0481343
REACTOME_G_PROTEIN_BETA_GAMMA_SIGNALLING	0.0506772
GRAHAM_CML_QUIESCENT_VS_CML_DIVIDING_UP	0.0506772
LI_WILMS_TUMOR_VS_FETAL_KIDNEY_2_UP	0.0506772
JEON_SMAD6_TARGETS_DN	0.0506772
CHESLER_BRAIN_HIGHEST_GENETIC_VARIANCE	0.0506772
LEIN_LOCALIZED_TO_DISTAL_AND_PROXIMAL_DENDRITES	0.0506772
LIN_TUMOR_ESCAPE_FROM_IMMUNE_ATTACK	0.0506772
CHEN_HOXA5_TARGETS_9HR_DN	0.0506772
HOSHIDA_LIVER_CANCER_SUBCLASS_S2	0.0506772
ZWANG_CLASS_2_TRANSIENTLY_INDUCED_BY_EGF	0.0506772
GO_REGULATION_OF_RECEPTOR_MEDIATED_ENDOCYTOSIS	0.0506772
GO_REGULATION_OF_DEPHOSPHORYLATION	0.0506772
GO_POSITIVE_REGULATION_OF_NUCLEAR_DIVISION	0.0506772
GO_NEGATIVE_REGULATION_OF_CARDIAC_MUSCLE_TISSUE_DEVELOPMENT	0.0506772
GO_MUSCLE_CELL_DIFFERENTIATION	0.0506772
GO_RECEPTOR_CLUSTERING	0.0506772
GO_B_CELL_ACTIVATION_INVOLVED_IN_IMMUNE_RESPONSE	0.0506772
GO_ZINC_ION_TRANSPORT	0.0506772
GO_NEGATIVE_REGULATION_OF_GLUTAMATE_SECRETION	0.0506772
GO_U4_SNRNA_3_END_PROCESSING	0.0506772
GO_MEMBRANE_DEPOLARIZATION_DURING_AV_NODE_CELL_ACTION_POTENTIAL	0.0506772
GO_CONDENSED_NUCLEAR_CHROMOSOME_KINETOCHORE	0.0506772
GO_NSL_COMPLEX	0.0506772
GO_EUKARYOTIC_TRANSLATION_INITIATION_FACTOR_3_COMPLEX_EIF3M	0.0506772
GO_G_RICH_STRAND_TELOMERIC_DNA_BINDING	0.0506772
KEGG_RENIN_ANGIOTENSIN_SYSTEM	0.053328
BIOCARTA_BARRESTIN_PATHWAY	0.053328
PID_FAS_PATHWAY	0.053328
PID_THROMBIN_PAR1_PATHWAY	0.053328
REACTOME_NEGATIVE_REGULATION_OF_THE_PI3K_AKT_NETWORK	0.053328
WEI_MIR34A_TARGETS	0.053328
GO_REGULATION_OF_OSTEOCLAST_DIFFERENTIATION	0.053328
GO_REGULATION_OF_PHOSPHATASE_ACTIVITY	0.053328
GO_NEURON_PROJECTION_EXTENSION_INVOLVED_IN_NEURON_PROJECTION_GUIDANCE	0.053328
GO_POSITIVE_REGULATION_OF_HISTONE_H3_K4_METHYLATION	0.053328
GO_NEURAL_PRECURSOR_CELL_PROLIFERATION	0.053328
GO_AMINO_ACID_TRANSPORT	0.053328
GO_POSITIVE_REGULATION_OF_NEUROLOGICAL_SYSTEM_PROCESS	0.053328
GO_NEGATIVE_REGULATION_OF_CELL_PROJECTION_ORGANIZATION	0.053328
GO_RRNA_3_END_PROCESSING	0.053328
GO_EXONUCLEOLYTIC_TRIMMING_INVOLVED_IN_RRNA_PROCESSING	0.053328
GO_PHYSIOLOGICAL_CARDIAC_MUSCLE_HYPERTROPHY	0.053328
GO_HISTONE_H3_K4_DEMETHYLATION_TRIMETHYL_H3_K4_SPECIFIC	0.053328
GO_INNER_EAR_AUDITORY_RECEPTOR_CELL_DIFFERENTIATION	0.053328
GO_MUCUS_SECRETION	0.053328
GO_NEGATIVE_REGULATION_OF_P38MAPK_CASCADE	0.053328
GO_POSITIVE_REGULATION_OF_VASCULAR_ENDOTHELIAL_CELL_PROLIFERATION	0.053328
GO_SPANNING_COMPONENT_OF_MEMBRANE	0.053328
GO_SINGLE_STRANDED_DNA_3_5_EXODEOXYRIBONUCLEASE_ACTIVITY	0.053328
PID_AVB3_OPN_PATHWAY	0.0560899
ODONNELL_TFRC_TARGETS_UP	0.0560899
DARWICHE_SQUAMOUS_CELL_CARCINOMA_DN	0.0560899
BORLAK_LIVER_CANCER_EGF_UP	0.0560899
KIM_MYCL1_AMPLIFICATION_TARGETS_DN	0.0560899
SHIPP_DLBCL_CURED_VS_FATAL_DN	0.0560899
HEDENFALK_BREAST_CANCER_BRACX_UP	0.0560899
JI_RESPONSE_TO_FSH_UP	0.0560899
MATZUK_EARLY_ANTRAL_FOLLICLE	0.0560899
BOYLAN_MULTIPLE_MYELOMA_C_D_UP	0.0560899
MIKKELSEN_PLURIPOTENT_STATE_UP	0.0560899
MIKKELSEN_NPC_ICP_WITH_H3K27ME3	0.0560899
GO_POSITIVE_REGULATION_OF_MUSCLE_CELL_DIFFERENTIATION	0.0560899
GO_DEVELOPMENTAL_INDUCTION	0.0560899
GO_DNA_MODIFICATION	0.0560899
GO_REGULATION_OF_FATTY_ACID_BIOSYNTHETIC_PROCESS	0.0560899
GO_REGULATION_OF_HISTONE_H3_K4_METHYLATION	0.0560899
GO_NEUROMUSCULAR_PROCESS_CONTROLLING_POSTURE	0.0560899
GO_LONG_CHAIN_FATTY_ACID_TRANSPORT	0.0560899
GO_CYTOPLASMIC_EXOSOME_RNASE_COMPLEX_	0.0560899
GO_PHOSPHATIDYLINOSITOL_PHOSPHATE_KINASE_ACTIVITY	0.0560899
GO_HYALURONIC_ACID_BINDING	0.0560899
GO_PEPTIDOGLYCAN_CATABOLIC_PROCESS	0.0560899
GO_NEURAL_PLATE_ANTERIOR_POSTERIOR_REGIONALIZATION	0.0560899
GO_REGULATION_OF_CYCLASE_ACTIVITY	0.0560899
GO_PHOSPHORYLATED_CARBOHYDRATE_DEPHOSPHORYLATION	0.0560899
GO_ANTIGEN_PROCESSING_AND_PRESENTATION_ENDOGENOUS_LIPID_ANTIGEN_VIA_MHC_CLASS_IB	0.0560899
GO_CHIASMA_ASSEMBLY	0.0560899
GO_POSITIVE_REGULATION_OF_PROTEIN_GLYCOSYLATION	0.0560899
GO_HYALURONONGLUCOSAMINIDASE_ACTIVITY	0.0560899
GO_LIPID_ANTIGEN_BINDING	0.0560899
BIOCARTA_D4GDI_PATHWAY	0.058966
REACTOME_PHOSPHORYLATION_OF_THE_APC_C	0.058966
TIEN_INTESTINE_PROBIOTICS_2HR_UP	0.058966
WONG_ENDOMETRIAL_CANCER_LATE	0.058966
KIM_MYCN_AMPLIFICATION_TARGETS_DN	0.058966
BACOLOD_RESISTANCE_TO_ALKYLATING_AGENTS_UP	0.058966
WEBER_METHYLATED_HCP_IN_SPERM_UP	0.058966
WEBER_METHYLATED_LCP_IN_SPERM_UP	0.058966
HOLLEMAN_DAUNORUBICIN_ALL_UP	0.058966
GO_POSITIVE_REGULATION_OF_NEUROBLAST_PROLIFERATION	0.058966
GO_FOREBRAIN_CELL_MIGRATION	0.058966
GO_POSITIVE_REGULATION_OF_GUANYLATE_CYCLASE_ACTIVITY	0.058966
GO_PRODUCTION_OF_MOLECULAR_MEDIATOR_INVOLVED_IN_INFLAMMATORY_RESPONSE	0.058966
GO_NUCLEOTIDE_EXCISION_REPAIR_DNA_INCISION	0.058966
GO_POSITIVE_REGULATION_OF_PROTEIN_MODIFICATION_BY_SMALL_PROTEIN_CONJUGATION_OR_REMOVAL	0.058966
GO_EXCITATORY_SYNAPSE	0.058966
GO_EXTRINSIC_COMPONENT_OF_ORGANELLE_MEMBRANE	0.058966
GO_RECEPTOR_SERINE_THREONINE_KINASE_BINDING	0.058966
GO_PROTEIN_KINASE_A_CATALYTIC_SUBUNIT_BINDING	0.058966
GO_CYTOPLASM_ORGANIZATION	0.058966
GO_SERINE_FAMILY_AMINO_ACID_CATABOLIC_PROCESS	0.058966
GO_TOXIN_BIOSYNTHETIC_PROCESS	0.058966
GO_REGULATION_OF_PROTEIN_ADP_RIBOSYLATION	0.058966
GO_DERMATAN_SULFATE_BIOSYNTHETIC_PROCESS	0.058966
GO_NEGATIVE_REGULATION_OF_INTERLEUKIN_13_PRODUCTION	0.058966
GO_NEGATIVE_REGULATION_OF_PROTEIN_EXPORT_FROM_NUCLEUS	0.058966
GO_EYE_PIGMENTATION	0.058966
GO_DERMATAN_SULFATE_PROTEOGLYCAN_BIOSYNTHETIC_PROCESS	0.058966
GO_VOLUNTARY_MUSCULOSKELETAL_MOVEMENT	0.058966
GO_NEGATIVE_REGULATION_OF_OXIDATIVE_PHOSPHORYLATION	0.058966
GO_NEGATIVE_REGULATION_OF_RNA_POLYMERASE_II_REGULATORY_REGION_SEQUENCE_SPECIFIC_DNA_BINDING	0.058966
GO_EXTRINSIC_COMPONENT_OF_MITOCHONDRIAL_INNER_MEMBRANE	0.058966
GO_NUCLEOSIDE_TRIPHOSPHATE_DIPHOSPHATASE_ACTIVITY	0.058966
REACTOME_EGFR_DOWNREGULATION	0.0619594
GARGALOVIC_RESPONSE_TO_OXIDIZED_PHOSPHOLIPIDS_BLUE_UP	0.0619594
DACOSTA_UV_RESPONSE_VIA_ERCC3_TTD_UP	0.0619594
XU_HGF_TARGETS_INDUCED_BY_AKT1_48HR_DN	0.0619594
JAZAG_TGFB1_SIGNALING_DN	0.0619594
LEE_LIVER_CANCER_ACOX1_UP	0.0619594
GRADE_COLON_AND_RECTAL_CANCER_DN	0.0619594
LOPEZ_MESOTHELIOMA_SURVIVAL_OVERALL_DN	0.0619594
FIGUEROA_AML_METHYLATION_CLUSTER_5_UP	0.0619594
BRUINS_UVC_RESPONSE_VIA_TP53_GROUP_D	0.0619594
GO_REGULATION_OF_FAT_CELL_DIFFERENTIATION	0.0619594
GO_CELL_CYCLE_DNA_REPLICATION	0.0619594
GO_NEGATIVE_REGULATION_OF_BIOMINERAL_TISSUE_DEVELOPMENT	0.0619594
GO_POSITIVE_REGULATION_OF_PROTEIN_LOCALIZATION_TO_CELL_SURFACE	0.0619594
GO_PTERIDINE_CONTAINING_COMPOUND_METABOLIC_PROCESS	0.0619594
GO_CELLULAR_RESPONSE_TO_EPINEPHRINE_STIMULUS	0.0619594
GO_EXPLORATION_BEHAVIOR	0.0619594
GO_DE_NOVO_PROTEIN_FOLDING	0.0619594
GO_RETINA_DEVELOPMENT_IN_CAMERA_TYPE_EYE	0.0619594
GO_FOLIC_ACID_METABOLIC_PROCESS	0.0619594
GO_REGULATION_OF_POTASSIUM_ION_TRANSPORT	0.0619594
GO_RESPONSE_TO_LEAD_ION	0.0619594
GO_UBIQUITIN_LIGASE_COMPLEX	0.0619594
GO_TAU_PROTEIN_BINDING	0.0619594
GO_FEMALE_MEIOSIS_I	0.0619594
GO_RESPONSE_TO_MUSCLE_INACTIVITY	0.0619594
GO_HEME_TRANSPORT	0.0619594
GO_TETRAPYRROLE_CATABOLIC_PROCESS	0.0619594
GO_PHOSPHATE_ION_TRANSMEMBRANE_TRANSPORT	0.0619594
GO_POSITIVE_REGULATION_OF_MUCUS_SECRETION	0.0619594
GO_POTASSIUM_ION_EXPORT_ACROSS_PLASMA_MEMBRANE	0.0619594
GO_POSITIVE_REGULATION_OF_CYTOKINE_PRODUCTION_INVOLVED_IN_INFLAMMATORY_RESPONSE	0.0619594
GO_POSITIVE_REGULATION_OF_VOLTAGE_GATED_CALCIUM_CHANNEL_ACTIVITY	0.0619594
GO_POSITIVE_REGULATION_OF_SYNAPTIC_VESICLE_CLUSTERING	0.0619594
GO_REGULATION_OF_CELLULAR_RESPONSE_TO_DRUG	0.0619594
GO_SEQUENCE_SPECIFIC_SINGLE_STRANDED_DNA_BINDING	0.0619594
REACTOME_GENERATION_OF_SECOND_MESSENGER_MOLECULES	0.0650735
REACTOME_PYRUVATE_METABOLISM	0.0650735
REACTOME_CONVERSION_FROM_APC_C_CDC20_TO_APC_C_CDH1_IN_LATE_ANAPHASE	0.0650735
REACTOME_REMOVAL_OF_THE_FLAP_INTERMEDIATE_FROM_THE_C_STRAND	0.0650735
MYLLYKANGAS_AMPLIFICATION_HOT_SPOT_9	0.0650735
DISTECHE_ESCAPED_FROM_X_INACTIVATION	0.0650735
SASAI_TARGETS_OF_CXCR6_AND_PTCH1_UP	0.0650735
MIKKELSEN_ES_LCP_WITH_H3K4ME3_AND_H3K27ME3	0.0650735
GO_NEGATIVE_REGULATION_OF_ACTIN_FILAMENT_BUNDLE_ASSEMBLY	0.0650735
GO_VITAMIN_D_METABOLIC_PROCESS	0.0650735
GO_PROTEIN_LOCALIZATION_TO_GOLGI_APPARATUS	0.0650735
GO_POSITIVE_REGULATION_OF_CALCIUM_ION_IMPORT	0.0650735
GO_ANAPHASE_PROMOTING_COMPLEX	0.0650735
GO_SELENIUM_COMPOUND_METABOLIC_PROCESS	0.0650735
GO_ADENOSINE_TO_INOSINE_EDITING	0.0650735
GO_PHOSPHATIDIC_ACID_BIOSYNTHETIC_PROCESS	0.0650735
GO_REGULATION_OF_TOLL_LIKE_RECEPTOR_9_SIGNALING_PATHWAY	0.0650735
GO_HISTONE_H3_S10_PHOSPHORYLATION	0.0650735
GO_POSITIVE_REGULATION_BY_HOST_OF_VIRAL_GENOME_REPLICATION	0.0650735
GO_ADENOSINE_METABOLIC_PROCESS	0.0650735
GO_SYNAPTIC_VESICLE_BUDDING	0.0650735
GO_REGULATION_OF_SPONTANEOUS_SYNAPTIC_TRANSMISSION	0.0650735
GO_NEGATIVE_REGULATION_OF_AMYLOID_PRECURSOR_PROTEIN_CATABOLIC_PROCESS	0.0650735
GO_REGULATION_OF_RECEPTOR_CLUSTERING	0.0650735
GO_SEMI_LUNAR_VALVE_DEVELOPMENT	0.0650735
GO_REGULATION_OF_AMPA_RECEPTOR_ACTIVITY	0.0650735
GO_AT_DNA_BINDING	0.0650735
GO_CHOLINE_TRANSMEMBRANE_TRANSPORTER_ACTIVITY	0.0650735
ST_MYOCYTE_AD_PATHWAY	0.0683114
REACTOME_REPAIR_SYNTHESIS_FOR_GAP_FILLING_BY_DNA_POL_IN_TC_NER	0.0683114
REACTOME_ACTIVATION_OF_THE_AP1_FAMILY_OF_TRANSCRIPTION_FACTORS	0.0683114
REACTOME_REGULATION_OF_SIGNALING_BY_CBL	0.0683114
REACTOME_UNWINDING_OF_DNA	0.0683114
KIM_WT1_TARGETS_8HR_UP	0.0683114
DACOSTA_UV_RESPONSE_VIA_ERCC3_UP	0.0683114
BENPORATH_OCT4_TARGETS	0.0683114
PEART_HDAC_PROLIFERATION_CLUSTER_UP	0.0683114
GENTILE_UV_RESPONSE_CLUSTER_D7	0.0683114
GENTILE_RESPONSE_CLUSTER_D3	0.0683114
KANG_CISPLATIN_RESISTANCE_DN	0.0683114
MATZUK_SPERMATID_DIFFERENTIATION	0.0683114
WEST_ADRENOCORTICAL_TUMOR_DN	0.0683114
BROWNE_HCMV_INFECTION_2HR_DN	0.0683114
BILANGES_SERUM_SENSITIVE_VIA_TSC2	0.0683114
GO_NEGATIVE_REGULATION_OF_JUN_KINASE_ACTIVITY	0.0683114
GO_POSITIVE_REGULATION_OF_B_CELL_MEDIATED_IMMUNITY	0.0683114
GO_LATERAL_MESODERM_DEVELOPMENT	0.0683114
GO_CHEMICAL_HOMEOSTASIS_WITHIN_A_TISSUE	0.0683114
GO_OOCYTE_DIFFERENTIATION	0.0683114
GO_VENTRICULAR_CARDIAC_MUSCLE_CELL_ACTION_POTENTIAL	0.0683114
GO_REGULATION_OF_VASCULAR_PERMEABILITY	0.0683114
GO_EMBRYONIC_CRANIAL_SKELETON_MORPHOGENESIS	0.0683114
GO_REGULATION_OF_CELL_FATE_COMMITMENT	0.0683114
GO_TRANSCRIPTION_FACTOR_TFIID_COMPLEX	0.0683114
GO_TRANS_GOLGI_NETWORK_MEMBRANE	0.0683114
GO_DEMETHYLASE_ACTIVITY	0.0683114
GO_GAMMA_CATENIN_BINDING	0.0683114
GO_OPSONIN_BINDING	0.0683114
GO_RNA_POLYMERASE_II_TRANSCRIPTION_FACTOR_BINDING	0.0683114
GO_HYDROLASE_ACTIVITY_ACTING_ON_CARBON_NITROGEN_BUT_NOT_PEPTIDE_BONDS	0.0683114
GO_REGULATION_OF_MUSCLE_ORGAN_DEVELOPMENT	0.0683114
GO_NEURON_FATE_DETERMINATION	0.0683114
GO_MEIOSIS_I_CELL_CYCLE_PROCESS	0.0683114
GO_NEURON_CELLULAR_HOMEOSTASIS	0.0683114
GO_NEGATIVE_REGULATION_OF_PLATELET_AGGREGATION	0.0683114
GO_IMMUNOLOGICAL_MEMORY_FORMATION_PROCESS	0.0683114
GO_AMPA_GLUTAMATE_RECEPTOR_CLUSTERING	0.0683114
GO_REGULATION_OF_HISTONE_H3_K9_TRIMETHYLATION	0.0683114
GO_POSITIVE_REGULATION_OF_CELLULAR_RESPIRATION	0.0683114
GO_DORSAL_ROOT_GANGLION_DEVELOPMENT	0.0683114
GO_POSITIVE_REGULATION_OF_RESPONSE_TO_DRUG	0.0683114
GO_DYSTROGLYCAN_COMPLEX	0.0683114
GO_HULC_COMPLEX	0.0683114
GO_RNA_POLYMERASE_II_GENERAL_TRANSCRIPTION_INITIATION_FACTOR_BINDING	0.0683114
GO_TOLL_LIKE_RECEPTOR_BINDING	0.0683114
GO_GLYCOSPHINGOLIPID_BINDING	0.0683114
GO_CALCITONIN_FAMILY_RECEPTOR_ACTIVITY	0.0683114
BIOCARTA_TNFR2_PATHWAY	0.0716764
PID_CDC42_REG_PATHWAY	0.0716764
REACTOME_REGULATION_OF_AMPK_ACTIVITY_VIA_LKB1	0.0716764
DAVICIONI_TARGETS_OF_PAX_FOXO1_FUSIONS_DN	0.0716764
RUNNE_GENDER_EFFECT_UP	0.0716764
GALIE_TUMOR_STEMNESS_GENES	0.0716764
ONDER_CDH1_TARGETS_1_DN	0.0716764
BURTON_ADIPOGENESIS_10	0.0716764
NIELSEN_LIPOSARCOMA_UP	0.0716764
SMIRNOV_RESPONSE_TO_IR_2HR_DN	0.0716764
GO_POSITIVE_REGULATION_OF_REACTIVE_OXYGEN_SPECIES_BIOSYNTHETIC_PROCESS	0.0716764
GO_REGULATION_OF_PROTEIN_GLYCOSYLATION	0.0716764
GO_GOLGI_RIBBON_FORMATION	0.0716764
GO_POSITIVE_REGULATION_OF_CYSTEINE_TYPE_ENDOPEPTIDASE_ACTIVITY_INVOLVED_IN_APOPTOTIC_SIGNALING_PATHWAY	0.0716764
GO_PERIPHERAL_NERVOUS_SYSTEM_DEVELOPMENT	0.0716764
GO_TELOMERASE_HOLOENZYME_COMPLEX	0.0716764
GO_GAMMA_TUBULIN_COMPLEX	0.0716764
GO_BIOACTIVE_LIPID_RECEPTOR_ACTIVITY	0.0716764
GO_RNA_POLYMERASE_I_PREINITIATION_COMPLEX_ASSEMBLY	0.0716764
GO_MITOCHONDRIAL_TRANSCRIPTION	0.0716764
GO_SUBSTRATE_DEPENDENT_CEREBRAL_CORTEX_TANGENTIAL_MIGRATION	0.0716764
GO_PARANODAL_JUNCTION_ASSEMBLY	0.0716764
GO_PROTEIN_TRANSPORT_WITHIN_LIPID_BILAYER	0.0716764
GO_NEGATIVE_REGULATION_OF_INTERLEUKIN_4_PRODUCTION	0.0716764
GO_MITOCHONDRIAL_PROTEIN_PROCESSING	0.0716764
GO_PEPTIDYL_TYROSINE_DEPHOSPHORYLATION	0.0716764
GO_PROLINE_TRANSMEMBRANE_TRANSPORT	0.0716764
GO_HISTONE_H3_K9_DIMETHYLATION	0.0716764
GO_SEMICIRCULAR_CANAL_MORPHOGENESIS	0.0716764
GO_INTERLEUKIN_1_ALPHA_SECRETION	0.0716764
GO_REGULATION_OF_PROTEIN_MONOUBIQUITINATION	0.0716764
GO_NEGATIVE_REGULATION_OF_SKELETAL_MUSCLE_CELL_DIFFERENTIATION	0.0716764
GO_SPHERICAL_HIGH_DENSITY_LIPOPROTEIN_PARTICLE	0.0716764
GO_CYTOPLASMIC_SIDE_OF_LYSOSOMAL_MEMBRANE	0.0716764
GO_RNA_POLYMERASE_I_REGULATORY_REGION_DNA_BINDING	0.0716764
GO_LIPID_KINASE_ACTIVITY	0.0716764
GO_L_PROLINE_TRANSMEMBRANE_TRANSPORTER_ACTIVITY	0.0716764
GO_AP_2_ADAPTOR_COMPLEX_BINDING	0.0716764
GO_SPHINGOLIPID_TRANSPORTER_ACTIVITY	0.0716764
ODONNELL_TARGETS_OF_MYC_AND_TFRC_UP	0.0751715
ZIRN_TRETINOIN_RESPONSE_WT1_UP	0.0751715
FERRANDO_T_ALL_WITH_MLL_ENL_FUSION_DN	0.0751715
WEIGEL_OXIDATIVE_STRESS_BY_HNE_AND_H2O2	0.0751715
DELASERNA_TARGETS_OF_MYOD_AND_SMARCA4	0.0751715
BONCI_TARGETS_OF_MIR15A_AND_MIR16_1	0.0751715
BOYLAN_MULTIPLE_MYELOMA_C_D_DN	0.0751715
WU_ALZHEIMER_DISEASE_DN	0.0751715
GO_COLLAGEN_FIBRIL_ORGANIZATION	0.0751715
GO_CARDIAC_LEFT_VENTRICLE_MORPHOGENESIS	0.0751715
GO_NOTCH_RECEPTOR_PROCESSING	0.0751715
GO_AMINO_ACID_TRANSMEMBRANE_TRANSPORT	0.0751715
GO_CELLULAR_RESPONSE_TO_RETINOIC_ACID	0.0751715
GO_REGULATION_OF_PROTEIN_LOCALIZATION_TO_CELL_SURFACE	0.0751715
GO_POSTSYNAPTIC_MEMBRANE_ORGANIZATION	0.0751715
GO_APPENDAGE_DEVELOPMENT	0.0751715
GO_GLYCINE_METABOLIC_PROCESS	0.0751715
GO_CELLULAR_PROCESS_INVOLVED_IN_REPRODUCTION_IN_MULTICELLULAR_ORGANISM	0.0751715
GO_REGULATION_OF_GLIAL_CELL_DIFFERENTIATION	0.0751715
GO_NEURON_PROJECTION_GUIDANCE	0.0751715
GO_CYCLIC_NUCLEOTIDE_GATED_ION_CHANNEL_ACTIVITY	0.0751715
GO_OXIDOREDUCTASE_ACTIVITY_OXIDIZING_METAL_IONS_NAD_OR_NADP_AS_ACCEPTOR	0.0751715
GO_CGMP_BINDING	0.0751715
GO_RESOLUTION_OF_MEIOTIC_RECOMBINATION_INTERMEDIATES	0.0751715
GO_OPTIC_CUP_MORPHOGENESIS_INVOLVED_IN_CAMERA_TYPE_EYE_DEVELOPMENT	0.0751715
GO_NEGATIVE_REGULATION_OF_FIBROBLAST_MIGRATION	0.0751715
GO_NEGATIVE_REGULATION_OF_NUCLEASE_ACTIVITY	0.0751715
GO_SNRNA_TRANSCRIPTION_BY_RNA_POLYMERASE_III	0.0751715
GO_ENUCLEATE_ERYTHROCYTE_DIFFERENTIATION	0.0751715
GO_SEMICIRCULAR_CANAL_DEVELOPMENT	0.0751715
GO_POSITIVE_REGULATION_OF_MEIOSIS_I	0.0751715
GO_MESONEPHRIC_TUBULE_FORMATION	0.0751715
GO_FIBROBLAST_ACTIVATION	0.0751715
GO_TRANS_SYNAPTIC_SIGNALING_BY_TRANS_SYNAPTIC_COMPLEX	0.0751715
GO_NEUROTRANSMITTER_RECEPTOR_LOCALIZATION_TO_POSTSYNAPTIC_SPECIALIZATION_MEMBRANE	0.0751715
GO_CELLULAR_DETOXIFICATION	0.0751715
GO_UBIQUITIN_PROTEIN_TRANSFERASE_REGULATOR_ACTIVITY	0.0751715
PID_VEGF_VEGFR_PATHWAY	0.0788002
PID_P53_DOWNSTREAM_PATHWAY	0.0788002
PID_IL8_CXCR1_PATHWAY	0.0788002
REACTOME_CALNEXIN_CALRETICULIN_CYCLE	0.0788002
REACTOME_INFLAMMASOMES	0.0788002
REACTOME_DNA_STRAND_ELONGATION	0.0788002
SOTIRIOU_BREAST_CANCER_GRADE_1_VS_3_DN	0.0788002
AIGNER_ZEB1_TARGETS	0.0788002
ZUCCHI_METASTASIS_DN	0.0788002
CHEOK_RESPONSE_TO_HD_MTX_DN	0.0788002
HESS_TARGETS_OF_HOXA9_AND_MEIS1_UP	0.0788002
LY_AGING_MIDDLE_UP	0.0788002
BROWNE_HCMV_INFECTION_24HR_UP	0.0788002
EHLERS_ANEUPLOIDY_DN	0.0788002
ZHOU_PANCREATIC_EXOCRINE_PROGENITOR	0.0788002
LY_AGING_OLD_UP	0.0788002
FIGUEROA_AML_METHYLATION_CLUSTER_2_UP	0.0788002
PEDERSEN_METASTASIS_BY_ERBB2_ISOFORM_5	0.0788002
GO_G_PROTEIN_COUPLED_RECEPTOR_INTERNALIZATION	0.0788002
GO_RIBONUCLEOTIDE_CATABOLIC_PROCESS	0.0788002
GO_NEGATIVE_REGULATION_OF_FAT_CELL_DIFFERENTIATION	0.0788002
GO_ESTABLISHMENT_OF_PROTEIN_LOCALIZATION_TO_ORGANELLE	0.0788002
GO_PROXIMAL_DISTAL_PATTERN_FORMATION	0.0788002
GO_ANATOMICAL_STRUCTURE_REGRESSION	0.0788002
GO_PERIPHERAL_NERVOUS_SYSTEM_NEURON_DIFFERENTIATION	0.0788002
GO_NUCLEOTIDE_EXCISION_REPAIR_DNA_GAP_FILLING	0.0788002
GO_RECEPTOR_METABOLIC_PROCESS	0.0788002
GO_INTRACELLULAR_LIPID_TRANSPORT	0.0788002
GO_NEGATIVE_REGULATION_OF_ORGANIC_ACID_TRANSPORT	0.0788002
GO_HEME_BIOSYNTHETIC_PROCESS	0.0788002
GO_INOSITOL_PHOSPHATE_MEDIATED_SIGNALING	0.0788002
GO_TRANS_GOLGI_NETWORK	0.0788002
GO_PRESYNAPTIC_ACTIVE_ZONE	0.0788002
GO_COLLAGEN_TRIMER	0.0788002
GO_DNA_POLYMERASE_ACTIVITY	0.0788002
GO_CELL_PROLIFERATION_IN_HINDBRAIN	0.0788002
GO_CORTICOSTEROID_HORMONE_SECRETION	0.0788002
GO_MODULATION_OF_SIGNAL_TRANSDUCTION_IN_OTHER_ORGANISM	0.0788002
GO_POSTSYNAPTIC_SPECIALIZATION_ASSEMBLY	0.0788002
GO_POSITIVE_REGULATION_OF_FLAGELLATED_SPERM_MOTILITY	0.0788002
GO_POSITIVE_REGULATION_OF_SYNAPTIC_VESICLE_RECYCLING	0.0788002
GO_REGULATION_OF_T_HELPER_2_CELL_CYTOKINE_PRODUCTION	0.0788002
GO_REGULATION_OF_MICROTUBULE_MOTOR_ACTIVITY	0.0788002
GO_DNA_RECOMBINASE_MEDIATOR_COMPLEX	0.0788002
GO_PROTON_TRANSPORTING_V_TYPE_ATPASE_V0_DOMAIN	0.0788002
GO_INTRINSIC_COMPONENT_OF_SYNAPTIC_MEMBRANE	0.0788002
GO_3M_COMPLEX	0.0788002
GO_PEPTIDE_BINDING	0.0788002
KEGG_WNT_SIGNALING_PATHWAY	0.0825655
BIOCARTA_DEATH_PATHWAY	0.0825655
BIOCARTA_CHREBP2_PATHWAY	0.0825655
BIOCARTA_MITOCHONDRIA_PATHWAY	0.0825655
BIOCARTA_41BB_PATHWAY	0.0825655
REACTOME_ACETYLCHOLINE_NEUROTRANSMITTER_RELEASE_CYCLE	0.0825655
REACTOME_G_ALPHA_Z_SIGNALLING_EVENTS	0.0825655
REACTOME_TRAF6_MEDIATED_INDUCTION_OF_TAK1_COMPLEX	0.0825655
REACTOME_SYNTHESIS_OF_GLYCOSYLPHOSPHATIDYLINOSITOL_GPI	0.0825655
OHASHI_AURKB_TARGETS	0.0825655
FUNG_IL2_TARGETS_WITH_STAT5_BINDING_SITES_T1	0.0825655
YANG_BREAST_CANCER_ESR1_BULK_DN	0.0825655
COLIN_PILOCYTIC_ASTROCYTOMA_VS_GLIOBLASTOMA_DN	0.0825655
HOEGERKORP_CD44_TARGETS_DIRECT_UP	0.0825655
ZAMORA_NOS2_TARGETS_UP	0.0825655
KAAB_HEART_ATRIUM_VS_VENTRICLE_UP	0.0825655
VERRECCHIA_RESPONSE_TO_TGFB1_C5	0.0825655
SAFFORD_T_LYMPHOCYTE_ANERGY	0.0825655
KRIGE_AMINO_ACID_DEPRIVATION	0.0825655
MCMURRAY_TP53_HRAS_COOPERATION_RESPONSE_DN	0.0825655
CHIANG_LIVER_CANCER_SUBCLASS_UNANNOTATED_UP	0.0825655
GO_CELLULAR_RESPONSE_TO_LIPOPROTEIN_PARTICLE_STIMULUS	0.0825655
GO_POSITIVE_REGULATION_OF_ENDOCYTOSIS	0.0825655
GO_REGULATION_OF_TRIGLYCERIDE_METABOLIC_PROCESS	0.0825655
GO_EMBRYONIC_SKELETAL_SYSTEM_MORPHOGENESIS	0.0825655
GO_OVULATION_CYCLE	0.0825655
GO_DEMETHYLATION	0.0825655
GO_MEIOTIC_CELL_CYCLE_PROCESS	0.0825655
GO_PYRUVATE_METABOLIC_PROCESS	0.0825655
GO_ORGANELLE_SUBCOMPARTMENT	0.0825655
GO_KINASE_ACTIVATOR_ACTIVITY	0.0825655
GO_GTP_BIOSYNTHETIC_PROCESS	0.0825655
GO_HYPEROSMOTIC_SALINITY_RESPONSE	0.0825655
GO_REGULATION_OF_INNER_EAR_AUDITORY_RECEPTOR_CELL_DIFFERENTIATION	0.0825655
GO_ARACHIDONIC_ACID_SECRETION	0.0825655
GO_REGULATION_OF_ENDOSOME_SIZE	0.0825655
GO_CHORIO_ALLANTOIC_FUSION	0.0825655
GO_PROLACTIN_SECRETION	0.0825655
GO_SKELETAL_MUSCLE_ACETYLCHOLINE_GATED_CHANNEL_CLUSTERING	0.0825655
GO_POSITIVE_REGULATION_OF_WNT_SIGNALING_PATHWAY_PLANAR_CELL_POLARITY_PATHWAY	0.0825655
GO_HEXOKINASE_ACTIVITY	0.0825655
GO_CALCIUM_POTASSIUM_SODIUM_ANTIPORTER_ACTIVITY	0.0825655
GO_PHOSPHATIDYLINOSITOL_4_5_BISPHOSPHATE_PHOSPHATASE_ACTIVITY	0.0825655
KEGG_TIGHT_JUNCTION	0.0864708
REACTOME_SIGNALING_BY_NODAL	0.0864708
REACTOME_APOPTOTIC_CLEAVAGE_OF_CELL_ADHESION_PROTEINS	0.0864708
REACTOME_CYTOSOLIC_TRNA_AMINOACYLATION	0.0864708
VERRECCHIA_DELAYED_RESPONSE_TO_TGFB1	0.0864708
LEE_AGING_CEREBELLUM_UP	0.0864708
POS_RESPONSE_TO_HISTAMINE_DN	0.0864708
DAIRKEE_CANCER_PRONE_RESPONSE_BPA	0.0864708
BOYERINAS_ONCOFETAL_TARGETS_OF_LET7A1	0.0864708
YAMASHITA_LIVER_CANCER_WITH_EPCAM_UP	0.0864708
WANG_RECURRENT_LIVER_CANCER_UP	0.0864708
FONTAINE_FOLLICULAR_THYROID_ADENOMA_UP	0.0864708
HAHTOLA_CTCL_CUTANEOUS	0.0864708
IVANOVSKA_MIR106B_TARGETS	0.0864708
FARDIN_HYPOXIA_9	0.0864708
LIM_MAMMARY_STEM_CELL_UP	0.0864708
GO_NCRNA_CATABOLIC_PROCESS	0.0864708
GO_IRON_COORDINATION_ENTITY_TRANSPORT	0.0864708
GO_REGULATION_OF_PHOSPHOLIPID_METABOLIC_PROCESS	0.0864708
GO_POSITIVE_REGULATION_OF_FATTY_ACID_BIOSYNTHETIC_PROCESS	0.0864708
GO_NEGATIVE_REGULATION_OF_NEUROTRANSMITTER_SECRETION	0.0864708
GO_OVULATION_CYCLE_PROCESS	0.0864708
GO_REGULATION_OF_CELL_MIGRATION_INVOLVED_IN_SPROUTING_ANGIOGENESIS	0.0864708
GO_NEURON_MIGRATION	0.0864708
GO_NEGATIVE_REGULATION_OF_DEPHOSPHORYLATION	0.0864708
GO_REGULATION_OF_POTASSIUM_ION_TRANSMEMBRANE_TRANSPORTER_ACTIVITY	0.0864708
GO_GERM_CELL_DEVELOPMENT	0.0864708
GO_NEGATIVE_REGULATION_OF_RECEPTOR_MEDIATED_ENDOCYTOSIS	0.0864708
GO_OSTEOCLAST_DIFFERENTIATION	0.0864708
GO_POSITIVE_REGULATION_OF_STRIATED_MUSCLE_CELL_DIFFERENTIATION	0.0864708
GO_NUCLEAR_CHROMOSOME_TELOMERIC_REGION	0.0864708
GO_L_SERINE_METABOLIC_PROCESS	0.0864708
GO_SHORT_TERM_MEMORY	0.0864708
GO_REGULATION_OF_CYTOLYSIS	0.0864708
GO_CAMERA_TYPE_EYE_DEVELOPMENT	0.0864708
GO_CGMP_CATABOLIC_PROCESS	0.0864708
GO_MITOTIC_SPINDLE_MIDZONE_ASSEMBLY	0.0864708
GO_NEGATIVE_REGULATION_OF_SYNAPTIC_TRANSMISSION_GLUTAMATERGIC	0.0864708
GO_GLYCOLYTIC_PROCESS_THROUGH_FRUCTOSE_6_PHOSPHATE	0.0864708
GO_LEUKOTRIENE_SIGNALING_PATHWAY	0.0864708
GO_REGULATION_OF_MEMBRANE_DEPOLARIZATION_DURING_ACTION_POTENTIAL	0.0864708
GO_VASCULAR_ENDOTHELIAL_CELL_PROLIFERATION	0.0864708
GO_REGULATION_OF_CELLULAR_RESPONSE_TO_OSMOTIC_STRESS	0.0864708
GO_NEGATIVE_REGULATION_OF_SUPRAMOLECULAR_FIBER_ORGANIZATION	0.0864708
GO_POSITIVE_REGULATION_OF_OXIDATIVE_PHOSPHORYLATION	0.0864708
GO_GOLGI_TRANS_CISTERNA	0.0864708
GO_N_ACETYLGLUCOSAMINE_6_O_SULFOTRANSFERASE_ACTIVITY	0.0864708
GO_UDP_GALACTOSE_BETA_N_ACETYLGLUCOSAMINE_BETA_1_3_GALACTOSYLTRANSFERASE_ACTIVITY	0.0864708
GO_DEOXYRIBONUCLEOTIDE_BINDING	0.0864708
KEGG_TAURINE_AND_HYPOTAURINE_METABOLISM	0.0905191
KEGG_DNA_REPLICATION	0.0905191
KEGG_EPITHELIAL_CELL_SIGNALING_IN_HELICOBACTER_PYLORI_INFECTION	0.0905191
BIOCARTA_P53_PATHWAY	0.0905191
PID_HIV_NEF_PATHWAY	0.0905191
ZHONG_RESPONSE_TO_AZACITIDINE_AND_TSA_UP	0.0905191
LINDGREN_BLADDER_CANCER_CLUSTER_3_UP	0.0905191
MCBRYAN_PUBERTAL_BREAST_6_7WK_DN	0.0905191
SCHAEFFER_SOX9_TARGETS_IN_PROSTATE_DEVELOPMENT_DN	0.0905191
TOMIDA_LUNG_CANCER_POOR_SURVIVAL	0.0905191
SMITH_TERT_TARGETS_UP	0.0905191
LEE_LIVER_CANCER_MYC_TGFA_UP	0.0905191
MARIADASON_REGULATED_BY_HISTONE_ACETYLATION_UP	0.0905191
BROWNE_HCMV_INFECTION_8HR_DN	0.0905191
KIM_GASTRIC_CANCER_CHEMOSENSITIVITY	0.0905191
RAMASWAMY_METASTASIS_UP	0.0905191
RIGGINS_TAMOXIFEN_RESISTANCE_DN	0.0905191
WHITFIELD_CELL_CYCLE_G2_M	0.0905191
HOLLEMAN_VINCRISTINE_RESISTANCE_ALL_DN	0.0905191
GO_METANEPHRIC_NEPHRON_MORPHOGENESIS	0.0905191
GO_POSITIVE_REGULATION_OF_DNA_REPLICATION	0.0905191
GO_RETINAL_GANGLION_CELL_AXON_GUIDANCE	0.0905191
GO_REGULATION_OF_RESPIRATORY_SYSTEM_PROCESS	0.0905191
GO_POSITIVE_REGULATION_OF_CELLULAR_EXTRAVASATION	0.0905191
GO_REGULATION_OF_EPIDERMAL_GROWTH_FACTOR_ACTIVATED_RECEPTOR_ACTIVITY	0.0905191
GO_REGULATION_OF_AXON_GUIDANCE	0.0905191
GO_NEGATIVE_REGULATION_OF_SYNAPTIC_TRANSMISSION	0.0905191
GO_REGULATION_OF_MRNA_3_END_PROCESSING	0.0905191
GO_NEGATIVE_REGULATION_OF_INTERLEUKIN_12_PRODUCTION	0.0905191
GO_SEMAPHORIN_PLEXIN_SIGNALING_PATHWAY	0.0905191
GO_SPERM_MIDPIECE	0.0905191
GO_CONDENSED_CHROMOSOME_OUTER_KINETOCHORE	0.0905191
GO_KINASE_REGULATOR_ACTIVITY	0.0905191
GO_INTERLEUKIN_1_RECEPTOR_BINDING	0.0905191
GO_MONOOXYGENASE_ACTIVITY	0.0905191
GO_SUGAR_MEDIATED_SIGNALING_PATHWAY	0.0905191
GO_ATTACHMENT_OF_GPI_ANCHOR_TO_PROTEIN	0.0905191
GO_TAURINE_METABOLIC_PROCESS	0.0905191
GO_PEPTIDE_CROSS_LINKING_VIA_CHONDROITIN_4_SULFATE_GLYCOSAMINOGLYCAN	0.0905191
GO_NEGATIVE_REGULATION_OF_BONE_MINERALIZATION	0.0905191
GO_NATURAL_KILLER_CELL_DEGRANULATION	0.0905191
GO_GROWTH_HORMONE_RECEPTOR_SIGNALING_PATHWAY_VIA_JAK_STAT	0.0905191
GO_OXYGEN_METABOLIC_PROCESS	0.0905191
GO_REGULATION_OF_POSTSYNAPTIC_MEMBRANE_NEUROTRANSMITTER_RECEPTOR_LEVELS	0.0905191
GO_MODIFICATION_OF_SYNAPTIC_STRUCTURE	0.0905191
GO_NEGATIVE_REGULATION_OF_ADENYLATE_CYCLASE_ACTIVATING_G_PROTEIN_COUPLED_RECEPTOR_SIGNALING_PATHWAY	0.0905191
GO_PEPTIDYL_TYROSINE_DEPHOSPHORYLATION_INVOLVED_IN_INACTIVATION_OF_PROTEIN_KINASE_ACTIVITY	0.0905191
GO_COLLAGEN_CONTAINING_EXTRACELLULAR_MATRIX	0.0905191
GO_INTRINSIC_COMPONENT_OF_POSTSYNAPTIC_MEMBRANE	0.0905191
GO_POSTSYNAPTIC_CYTOSOL	0.0905191
GO_COMPLEMENT_COMPONENT_C1Q_BINDING	0.0905191
GO_DOLICHYL_PHOSPHATE_MANNOSE_PROTEIN_MANNOSYLTRANSFERASE_ACTIVITY	0.0905191
GO_CLASS_I_DNA_APURINIC_OR_APYRIMIDINIC_SITE_ENDONUCLEASE_ACTIVITY	0.0905191
BIOCARTA_ACE2_PATHWAY	0.0947138
BIOCARTA_CD40_PATHWAY	0.0947138
BIOCARTA_IL1R_PATHWAY	0.0947138
PID_TRAIL_PATHWAY	0.0947138
PID_RET_PATHWAY	0.0947138
PID_PLK1_PATHWAY	0.0947138
PID_TGFBR_PATHWAY	0.0947138
REACTOME_CS_DS_DEGRADATION	0.0947138
REACTOME_3_UTR_MEDIATED_TRANSLATIONAL_REGULATION	0.0947138
REACTOME_TRAFFICKING_OF_AMPA_RECEPTORS	0.0947138
WANG_RESPONSE_TO_ANDROGEN_UP	0.0947138
GARGALOVIC_RESPONSE_TO_OXIDIZED_PHOSPHOLIPIDS_RED_UP	0.0947138
RAMJAUN_APOPTOSIS_BY_TGFB1_VIA_MAPK1_DN	0.0947138
FARMER_BREAST_CANCER_APOCRINE_VS_BASAL	0.0947138
BROWN_MYELOID_CELL_DEVELOPMENT_DN	0.0947138
JOSEPH_RESPONSE_TO_SODIUM_BUTYRATE_UP	0.0947138
ACEVEDO_LIVER_CANCER_WITH_H3K9ME3_UP	0.0947138
JIANG_TIP30_TARGETS_UP	0.0947138
KANG_AR_TARGETS_DN	0.0947138
SUZUKI_CTCFL_TARGETS_UP	0.0947138
LIM_MAMMARY_STEM_CELL_DN	0.0947138
ANDERSEN_CHOLANGIOCARCINOMA_CLASS2	0.0947138
GO_RESPIRATORY_GASEOUS_EXCHANGE	0.0947138
GO_REGULATION_OF_SYNAPTIC_TRANSMISSION_GLUTAMATERGIC	0.0947138
GO_NEUROTRANSMITTER_TRANSPORT	0.0947138
GO_MULTICELLULAR_ORGANISMAL_MOVEMENT	0.0947138
GO_POSITIVE_REGULATION_OF_RESPONSE_TO_OXIDATIVE_STRESS	0.0947138
GO_NEGATIVE_REGULATION_OF_MYELOID_LEUKOCYTE_DIFFERENTIATION	0.0947138
GO_MAINTENANCE_OF_GASTROINTESTINAL_EPITHELIUM	0.0947138
GO_HISTONE_H3_K4_METHYLATION	0.0947138
GO_APOPTOTIC_PROCESS_INVOLVED_IN_MORPHOGENESIS	0.0947138
GO_NEUROMUSCULAR_SYNAPTIC_TRANSMISSION	0.0947138
GO_RESPONSE_TO_CADMIUM_ION	0.0947138
GO_EPITHELIAL_CELL_FATE_COMMITMENT	0.0947138
GO_POSITIVE_REGULATION_OF_BLOOD_VESSEL_ENDOTHELIAL_CELL_MIGRATION	0.0947138
GO_CELLULAR_RESPONSE_TO_GONADOTROPIN_STIMULUS	0.0947138
GO_INOSITOL_LIPID_MEDIATED_SIGNALING	0.0947138
GO_NUCLEAR_EXOSOME_RNASE_COMPLEX_	0.0947138
GO_SMOOTH_ENDOPLASMIC_RETICULUM	0.0947138
GO_POLYSOME	0.0947138
GO_MAIN_AXON	0.0947138
GO_PRESYNAPSE	0.0947138
GO_LYSOPHOSPHOLIPASE_ACTIVITY	0.0947138
GO_PHOSPHATIDYLINOSITOL_3_KINASE_ACTIVITY	0.0947138
GO_DNA_DEALKYLATION_INVOLVED_IN_DNA_REPAIR	0.0947138
GO_TRANSCRIPTION_INITIATION_FROM_RNA_POLYMERASE_III_PROMOTER	0.0947138
GO_PEROXISOME_FISSION	0.0947138
GO_STEROID_HORMONE_SECRETION	0.0947138
GO_REGULATION_OF_GLUCONEOGENESIS_BY_REGULATION_OF_TRANSCRIPTION_FROM_RNA_POLYMERASE_II_PROMOTER	0.0947138
GO_CELLULAR_RESPONSE_TO_INCREASED_OXYGEN_LEVELS	0.0947138
GO_XENOBIOTIC_TRANSPORT	0.0947138
GO_ISOTYPE_SWITCHING_TO_IGA_ISOTYPES	0.0947138
GO_MICROTUBULE_NUCLEATION_BY_INTERPHASE_MICROTUBULE_ORGANIZING_CENTER	0.0947138
GO_EPITHELIAL_CELL_PROLIFERATION_INVOLVED_IN_SALIVARY_GLAND_MORPHOGENESIS	0.0947138
GO_LABYRINTHINE_LAYER_MORPHOGENESIS	0.0947138
GO_MODIFICATION_OF_POSTSYNAPTIC_ACTIN_CYTOSKELETON	0.0947138
GO_POSITIVE_REGULATION_OF_ADENYLATE_CYCLASE_ACTIVATING_G_PROTEIN_COUPLED_RECEPTOR_SIGNALING_PATHWAY	0.0947138
GO_NEGATIVE_REGULATION_OF_CYTOKINE_PRODUCTION_INVOLVED_IN_INFLAMMATORY_RESPONSE	0.0947138
GO_POSITIVE_REGULATION_OF_LEUKOCYTE_ADHESION_TO_VASCULAR_ENDOTHELIAL_CELL	0.0947138
GO_REGULATION_OF_STEM_CELL_DIVISION	0.0947138
GO_POSITIVE_REGULATION_OF_MESODERM_DEVELOPMENT	0.0947138
GO_EXTRINSIC_COMPONENT_OF_ENDOSOME_MEMBRANE	0.0947138
GO_PHOSPHATIDYLINOSITOL_4_5_BISPHOSPHATE_5_PHOSPHATASE_ACTIVITY	0.0947138
GO_1_PHOSPHATIDYLINOSITOL_4_PHOSPHATE_3_KINASE_ACTIVITY	0.0947138
GO_ENDOCYTIC_ADAPTOR_ACTIVITY	0.0947138
KEGG_RIBOSOME	0.0990578
KEGG_CHEMOKINE_SIGNALING_PATHWAY	0.0990578
REACTOME_REGULATION_OF_IFNG_SIGNALING	0.0990578
TAKEDA_TARGETS_OF_NUP98_HOXA9_FUSION_3D_DN	0.0990578
TIEN_INTESTINE_PROBIOTICS_6HR_DN	0.0990578
MYLLYKANGAS_AMPLIFICATION_HOT_SPOT_7	0.0990578
SUH_COEXPRESSED_WITH_ID1_AND_ID2_UP	0.0990578
SHEN_SMARCA2_TARGETS_DN	0.0990578
BRACHAT_RESPONSE_TO_CAMPTOTHECIN_UP	0.0990578
ZEMBUTSU_SENSITIVITY_TO_VINBLASTINE	0.0990578
FISCHER_G2_M_CELL_CYCLE	0.0990578
GO_SYNAPTIC_VESICLE_LOCALIZATION	0.0990578
GO_MEMBRANE_BIOGENESIS	0.0990578
GO_CHROMOSOME_LOCALIZATION	0.0990578
GO_POSITIVE_REGULATION_OF_BMP_SIGNALING_PATHWAY	0.0990578
GO_INTESTINAL_EPITHELIAL_CELL_DEVELOPMENT	0.0990578
GO_REGULATION_OF_CELL_DIVISION	0.0990578
GO_RESPONSE_TO_CAFFEINE	0.0990578
GO_REGULATION_OF_CHOLESTEROL_METABOLIC_PROCESS	0.0990578
GO_LENS_MORPHOGENESIS_IN_CAMERA_TYPE_EYE	0.0990578
GO_POSITIVE_REGULATION_OF_B_CELL_ACTIVATION	0.0990578
GO_POSITIVE_REGULATION_OF_PHOSPHATIDYLINOSITOL_3_KINASE_SIGNALING	0.0990578
GO_AUTOPHAGOSOME_ORGANIZATION	0.0990578
GO_RESPONSE_TO_ACTIVITY	0.0990578
GO_AMIDE_BINDING	0.0990578
GO_UREA_TRANSPORT	0.0990578
GO_REGULATION_OF_SODIUM_PROTON_ANTIPORTER_ACTIVITY	0.0990578
GO_NUCLEOSIDE_MONOPHOSPHATE_PHOSPHORYLATION	0.0990578
GO_MAMMARY_GLAND_INVOLUTION	0.0990578
GO_CARDIAC_MUSCLE_CELL_FATE_COMMITMENT	0.0990578
GO_PROTEIN_MATURATION_BY_IRON_SULFUR_CLUSTER_TRANSFER	0.0990578
GO_NEGATIVE_REGULATION_OF_DELAYED_RECTIFIER_POTASSIUM_CHANNEL_ACTIVITY	0.0990578
GO_POSITIVE_REGULATION_OF_RECEPTOR_CLUSTERING	0.0990578
GO_GOLGI_MEDIAL_CISTERNA	0.0990578
GO_DENDRITIC_SPINE_HEAD	0.0990578
GO_GABA_ERGIC_SYNAPSE	0.0990578
GO_AMINO_ACID_SODIUM_SYMPORTER_ACTIVITY	0.0990578
GO_UDP_GLUCOSYLTRANSFERASE_ACTIVITY	0.0990578
GO_VOLTAGE_GATED_CALCIUM_CHANNEL_ACTIVITY_INVOLVED_IN_REGULATION_OF_PRESYNAPTIC_CYTOSOLIC_CALCIUM_LEVELS	0.0990578
GO_GENERAL_TRANSCRIPTION_INITIATION_FACTOR_ACTIVITY	0.0990578
PID_NOTCH_PATHWAY	0.103554
REACTOME_NEF_MEDIATES_DOWN_MODULATION_OF_CELL_SURFACE_RECEPTORS_BY_RECRUITING_THEM_TO_CLATHRIN_ADAPTERS	0.103554
REACTOME_INTEGRATION_OF_ENERGY_METABOLISM	0.103554
REACTOME_DEPOSITION_OF_NEW_CENPA_CONTAINING_NUCLEOSOMES_AT_THE_CENTROMERE	0.103554
REACTOME_INHIBITION_OF_REPLICATION_INITIATION_OF_DAMAGED_DNA_BY_RB1_E2F1	0.103554
PICCALUGA_ANGIOIMMUNOBLASTIC_LYMPHOMA_DN	0.103554
PEPPER_CHRONIC_LYMPHOCYTIC_LEUKEMIA_UP	0.103554
MULLIGHAN_MLL_SIGNATURE_2_DN	0.103554
GAUSSMANN_MLL_AF4_FUSION_TARGETS_G_UP	0.103554
MYLLYKANGAS_AMPLIFICATION_HOT_SPOT_16	0.103554
SNIJDERS_AMPLIFIED_IN_HEAD_AND_NECK_TUMORS	0.103554
YORDY_RECIPROCAL_REGULATION_BY_ETS1_AND_SP100_UP	0.103554
LIEN_BREAST_CARCINOMA_METAPLASTIC_VS_DUCTAL_DN	0.103554
TCGA_GLIOBLASTOMA_COPY_NUMBER_UP	0.103554
ZHENG_FOXP3_TARGETS_IN_T_LYMPHOCYTE_DN	0.103554
LABBE_TGFB1_TARGETS_DN	0.103554
DORN_ADENOVIRUS_INFECTION_12HR_DN	0.103554
DUAN_PRDM5_TARGETS	0.103554
VANLOO_SP3_TARGETS_UP	0.103554
PHONG_TNF_RESPONSE_VIA_P38_COMPLETE	0.103554
GO_REGULATION_OF_PROTEIN_TYROSINE_KINASE_ACTIVITY	0.103554
GO_REGULATION_OF_RESPIRATORY_GASEOUS_EXCHANGE_BY_NEUROLOGICAL_SYSTEM_PROCESS	0.103554
GO_BONE_CELL_DEVELOPMENT	0.103554
GO_POSITIVE_REGULATION_OF_TYPE_2_IMMUNE_RESPONSE	0.103554
GO_NEGATIVE_REGULATION_OF_VASCULATURE_DEVELOPMENT	0.103554
GO_REGULATION_OF_DNA_BIOSYNTHETIC_PROCESS	0.103554
GO_POSITIVE_REGULATION_OF_PROTEIN_DEACETYLATION	0.103554
GO_REGULATION_OF_HEART_GROWTH	0.103554
GO_PEPTIDYL_ASPARAGINE_MODIFICATION	0.103554
GO_FILOPODIUM_ASSEMBLY	0.103554
GO_LATE_ENDOSOME_MEMBRANE	0.103554
GO_NEURON_PROJECTION_TERMINUS	0.103554
GO_POSTSYNAPTIC_MEMBRANE	0.103554
GO_ACYLGLYCEROL_METABOLIC_PROCESS	0.103554
GO_TOLL_SIGNALING_PATHWAY	0.103554
GO_SEQUESTERING_OF_ZINC_ION	0.103554
GO_MOLYBDOPTERIN_COFACTOR_BIOSYNTHETIC_PROCESS	0.103554
GO_RESPONSE_TO_L_ASCORBIC_ACID	0.103554
GO_T_HELPER_2_CELL_CYTOKINE_PRODUCTION	0.103554
GO_ACYLGLYCEROL_ACYL_CHAIN_REMODELING	0.103554
GO_NEGATIVE_REGULATION_OF_PROTEIN_KINASE_ACTIVITY_BY_REGULATION_OF_PROTEIN_PHOSPHORYLATION	0.103554
GO_NEGATIVE_REGULATION_OF_HISTONE_H3_K4_METHYLATION	0.103554
GO_CORONARY_VASCULATURE_MORPHOGENESIS	0.103554
GO_UTERINE_SMOOTH_MUSCLE_CONTRACTION	0.103554
GO_DENDRITE_SELF_AVOIDANCE	0.103554
GO_RECEPTOR_LOCALIZATION_TO_NON_MOTILE_CILIUM	0.103554
GO_REGULATION_OF_CARBOHYDRATE_METABOLIC_PROCESS_BY_REGULATION_OF_TRANSCRIPTION_FROM_RNA_POLYMERASE_II_PROMOTER	0.103554
GO_RESPONSE_TO_AMYLOID_BETA	0.103554
GO_DIHYDROLIPOYL_DEHYDROGENASE_COMPLEX	0.103554
GO_SMAD_PROTEIN_COMPLEX	0.103554
GO_INTRINSIC_COMPONENT_OF_PRESYNAPTIC_MEMBRANE	0.103554
GO_BENZODIAZEPINE_RECEPTOR_ACTIVITY	0.103554
GO_HISTONE_DEMETHYLASE_ACTIVITY_H3_K4_SPECIFIC_	0.103554
KEGG_FRUCTOSE_AND_MANNOSE_METABOLISM	0.108207
PID_RHODOPSIN_PATHWAY	0.108207
REACTOME_METABOLISM_OF_STEROID_HORMONES_AND_VITAMINS_A_AND_D	0.108207
REACTOME_AMINO_ACID_SYNTHESIS_AND_INTERCONVERSION_TRANSAMINATION	0.108207
GAZDA_DIAMOND_BLACKFAN_ANEMIA_MYELOID_UP	0.108207
GARY_CD5_TARGETS_UP	0.108207
MULLIGHAN_NPM1_MUTATED_SIGNATURE_1_UP	0.108207
WAMUNYOKOLI_OVARIAN_CANCER_LMP_UP	0.108207
ROZANOV_MMP14_TARGETS_DN	0.108207
DORSAM_HOXA9_TARGETS_UP	0.108207
KUROKAWA_LIVER_CANCER_CHEMOTHERAPY_UP	0.108207
KYNG_DNA_DAMAGE_BY_GAMMA_RADIATION	0.108207
LIN_MELANOMA_COPY_NUMBER_DN	0.108207
WEBER_METHYLATED_HCP_IN_FIBROBLAST_UP	0.108207
GRADE_COLON_VS_RECTAL_CANCER_DN	0.108207
VALK_AML_CLUSTER_12	0.108207
CHIANG_LIVER_CANCER_SUBCLASS_INTERFERON_DN	0.108207
UROSEVIC_RESPONSE_TO_IMIQUIMOD	0.108207
WEBER_METHYLATED_LCP_IN_FIBROBLAST_UP	0.108207
DELPUECH_FOXO3_TARGETS_DN	0.108207
GO_REGULATION_OF_LYASE_ACTIVITY	0.108207
GO_CORONARY_VASCULATURE_DEVELOPMENT	0.108207
GO_REGULATION_OF_CHROMATIN_BINDING	0.108207
GO_REGULATION_OF_NUCLEAR_CELL_CYCLE_DNA_REPLICATION	0.108207
GO_ONE_CARBON_COMPOUND_TRANSPORT	0.108207
GO_PURINE_NUCLEOSIDE_BIOSYNTHETIC_PROCESS	0.108207
GO_NEGATIVE_REGULATION_OF_MACROPHAGE_DERIVED_FOAM_CELL_DIFFERENTIATION	0.108207
GO_REGULATION_OF_HEART_RATE_BY_CARDIAC_CONDUCTION	0.108207
GO_REGULATION_OF_ATPASE_ACTIVITY	0.108207
GO_SYNAPTIC_TRANSMISSION_GLUTAMATERGIC	0.108207
GO_CELLULAR_TRANSITION_METAL_ION_HOMEOSTASIS	0.108207
GO_NEGATIVE_REGULATION_OF_MYELOID_CELL_DIFFERENTIATION	0.108207
GO_FATTY_ACID_TRANSPORT	0.108207
GO_CCR4_NOT_COMPLEX	0.108207
GO_CHROMOSOME_TELOMERIC_REGION	0.108207
GO_PLASMA_MEMBRANE_RAFT	0.108207
GO_HISTONE_DEMETHYLASE_ACTIVITY	0.108207
GO_NEUREXIN_FAMILY_PROTEIN_BINDING	0.108207
GO_SEROTONIN_SECRETION	0.108207
GO_REGULATION_OF_SYSTEMIC_ARTERIAL_BLOOD_PRESSURE_BY_ENDOTHELIN	0.108207
GO_HISTONE_SERINE_PHOSPHORYLATION	0.108207
GO_CHONDROCYTE_PROLIFERATION	0.108207
GO_ATF6_MEDIATED_UNFOLDED_PROTEIN_RESPONSE	0.108207
GO_ALDEHYDE_BIOSYNTHETIC_PROCESS	0.108207
GO_NEGATIVE_REGULATION_OF_RESPONSE_TO_INTERFERON_GAMMA	0.108207
GO_CELLULAR_RESPONSE_TO_SALT_STRESS	0.108207
GO_AV_NODE_CELL_TO_BUNDLE_OF_HIS_CELL_COMMUNICATION	0.108207
GO_ATRIAL_CARDIAC_MUSCLE_CELL_MEMBRANE_REPOLARIZATION	0.108207
GO_REGULATION_OF_ADENYLATE_CYCLASE_ACTIVATING_G_PROTEIN_COUPLED_RECEPTOR_SIGNALING_PATHWAY	0.108207
GO_INTERMEMBRANE_LIPID_TRANSFER	0.108207
GO_CHANGES_TO_DNA_METHYLATION_INVOLVED_IN_EMBRYO_DEVELOPMENT	0.108207
GO_CENTRAL_ELEMENT	0.108207
GO_CHROMATIN_SILENCING_COMPLEX	0.108207
GO_NUCLEAR_EXPORT_SIGNAL_RECEPTOR_ACTIVITY	0.108207
GO_CYCLIN_DEPENDENT_PROTEIN_SERINE_THREONINE_KINASE_ACTIVATOR_ACTIVITY	0.108207
GO_INTERMEMBRANE_LIPID_TRANSFER_ACTIVITY	0.108207
BIOCARTA_HIF_PATHWAY	0.113018
PID_ERBB2_ERBB3_PATHWAY	0.113018
REACTOME_TRANSFERRIN_ENDOCYTOSIS_AND_RECYCLING	0.113018
TIEN_INTESTINE_PROBIOTICS_6HR_UP	0.113018
CAFFAREL_RESPONSE_TO_THC_8HR_3_UP	0.113018
SCHAEFFER_PROSTATE_DEVELOPMENT_AND_CANCER_BOX6_UP	0.113018
LIN_APC_TARGETS	0.113018
HADDAD_T_LYMPHOCYTE_AND_NK_PROGENITOR_UP	0.113018
CHIARETTI_ACUTE_LYMPHOBLASTIC_LEUKEMIA_ZAP70	0.113018
SCHLINGEMANN_SKIN_CARCINOGENESIS_TPA_UP	0.113018
BURTON_ADIPOGENESIS_11	0.113018
GAVIN_FOXP3_TARGETS_CLUSTER_P6	0.113018
WANG_LSD1_TARGETS_DN	0.113018
CLAUS_PGR_POSITIVE_MENINGIOMA_DN	0.113018
CAMPS_COLON_CANCER_COPY_NUMBER_UP	0.113018
LABBE_TARGETS_OF_TGFB1_AND_WNT3A_DN	0.113018
CHAUHAN_RESPONSE_TO_METHOXYESTRADIOL_DN	0.113018
CAIRO_HEPATOBLASTOMA_POOR_SURVIVAL	0.113018
NIELSEN_GIST_VS_SYNOVIAL_SARCOMA_DN	0.113018
MALIK_REPRESSED_BY_ESTROGEN	0.113018
GO_NEGATIVE_REGULATION_OF_ENDOCYTOSIS	0.113018
GO_NEGATIVE_REGULATION_OF_CYTOKINE_BIOSYNTHETIC_PROCESS	0.113018
GO_DIGESTIVE_TRACT_MORPHOGENESIS	0.113018
GO_NEGATIVE_REGULATION_OF_CELL_CYCLE_ARREST	0.113018
GO_POSITIVE_REGULATION_OF_CYTOKINESIS	0.113018
GO_LONG_TERM_SYNAPTIC_POTENTIATION	0.113018
GO_ENDOTHELIAL_CELL_PROLIFERATION	0.113018
GO_CAMERA_TYPE_EYE_MORPHOGENESIS	0.113018
GO_KINESIN_COMPLEX	0.113018
GO_BRUSH_BORDER_MEMBRANE	0.113018
GO_HYDROLASE_ACTIVITY_ACTING_ON_CARBON_NITROGEN_BUT_NOT_PEPTIDE_BONDS_IN_LINEAR_AMIDINES	0.113018
GO_NEUROPEPTIDE_RECEPTOR_ACTIVITY	0.113018
GO_REGULATION_OF_ANTIGEN_PROCESSING_AND_PRESENTATION_OF_PEPTIDE_OR_POLYSACCHARIDE_ANTIGEN_VIA_MHC_CLASS_II	0.113018
GO_SEPTUM_PRIMUM_DEVELOPMENT	0.113018
GO_ATRIAL_SEPTUM_PRIMUM_MORPHOGENESIS	0.113018
GO_POLYAMINE_TRANSPORT	0.113018
GO_POLY_A_PLUS_MRNA_EXPORT_FROM_NUCLEUS	0.113018
GO_PEPTIDYL_HISTIDINE_MODIFICATION	0.113018
GO_REGULATION_OF_CEREBELLAR_GRANULE_CELL_PRECURSOR_PROLIFERATION	0.113018
GO_CHONDROITIN_SULFATE_METABOLIC_PROCESS	0.113018
GO_TELOMERE_MAINTENANCE_VIA_SEMI_CONSERVATIVE_REPLICATION	0.113018
GO_POSITIVE_REGULATION_OF_TOLL_LIKE_RECEPTOR_4_SIGNALING_PATHWAY	0.113018
GO_CD4_POSITIVE_ALPHA_BETA_T_CELL_CYTOKINE_PRODUCTION	0.113018
GO_CHAPERONE_COFACTOR_DEPENDENT_PROTEIN_REFOLDING	0.113018
GO_REGULATION_OF_BRANCHING_INVOLVED_IN_PROSTATE_GLAND_MORPHOGENESIS	0.113018
GO_IRES_DEPENDENT_VIRAL_TRANSLATIONAL_INITIATION	0.113018
GO_REVERSIBLE_DIFFERENTIATION	0.113018
GO_POSTSYNAPSE_ORGANIZATION	0.113018
GO_CHEMICAL_SYNAPTIC_TRANSMISSION_POSTSYNAPTIC	0.113018
GO_POSITIVE_REGULATION_OF_CELL_MATURATION	0.113018
GO_PROTEIN_LOCALIZATION_TO_CILIARY_MEMBRANE	0.113018
GO_NEGATIVE_REGULATION_OF_VOLTAGE_GATED_POTASSIUM_CHANNEL_ACTIVITY	0.113018
GO_REGULATION_OF_INTESTINAL_ABSORPTION	0.113018
GO_POSITIVE_REGULATION_OF_EPITHELIAL_TO_MESENCHYMAL_TRANSITION_INVOLVED_IN_ENDOCARDIAL_CUSHION_FORMATION	0.113018
GO_POSITIVE_REGULATION_OF_T_HELPER_2_CELL_CYTOKINE_PRODUCTION	0.113018
GO_ASTER	0.113018
GO_PROTON_TRANSPORTING_ATP_SYNTHASE_COMPLEX_CATALYTIC_CORE_F_1_	0.113018
GO_GLYCINERGIC_SYNAPSE	0.113018
GO_HISTAMINE_RECEPTOR_ACTIVITY	0.113018
GO_2_OXOGLUTARATE_DEPENDENT_DIOXYGENASE_ACTIVITY	0.113018
GO_CD4_RECEPTOR_BINDING	0.113018
KEGG_CYSTEINE_AND_METHIONINE_METABOLISM	0.11799
BIOCARTA_CASPASE_PATHWAY	0.11799
BIOCARTA_STRESS_PATHWAY	0.11799
REACTOME_PEPTIDE_CHAIN_ELONGATION	0.11799
REACTOME_ENERGY_DEPENDENT_REGULATION_OF_MTOR_BY_LKB1_AMPK	0.11799
REACTOME_NETRIN1_SIGNALING	0.11799
REACTOME_SYNTHESIS_OF_SUBSTRATES_IN_N_GLYCAN_BIOSYTHESIS	0.11799
KIM_RESPONSE_TO_TSA_AND_DECITABINE_UP	0.11799
SMITH_LIVER_CANCER	0.11799
XU_RESPONSE_TO_TRETINOIN_DN	0.11799
MA_PITUITARY_FETAL_VS_ADULT_DN	0.11799
PALOMERO_GSI_SENSITIVITY_UP	0.11799
ICHIBA_GRAFT_VERSUS_HOST_DISEASE_35D_DN	0.11799
TRACEY_RESISTANCE_TO_IFNA2_UP	0.11799
BILANGES_SERUM_SENSITIVE_GENES	0.11799
GO_REGULATION_OF_MAMMARY_GLAND_EPITHELIAL_CELL_PROLIFERATION	0.11799
GO_INTERMEDIATE_FILAMENT_ORGANIZATION	0.11799
GO_NEGATIVE_REGULATION_OF_NEUROLOGICAL_SYSTEM_PROCESS	0.11799
GO_ORGANIC_ACID_TRANSPORT	0.11799
GO_BASE_EXCISION_REPAIR	0.11799
GO_REGULATION_OF_MYELOID_CELL_DIFFERENTIATION	0.11799
GO_LIPOXYGENASE_PATHWAY	0.11799
GO_PONS_DEVELOPMENT	0.11799
GO_QUATERNARY_AMMONIUM_GROUP_TRANSPORT	0.11799
GO_REGULATION_OF_CALCIUM_ION_IMPORT	0.11799
GO_REGULATION_OF_DNA_DAMAGE_CHECKPOINT	0.11799
GO_ADENYLATE_CYCLASE_INHIBITING_G_PROTEIN_COUPLED_RECEPTOR_SIGNALING_PATHWAY	0.11799
GO_MITOCHONDRION_MORPHOGENESIS	0.11799
GO_PROTEIN_C_TERMINUS_BINDING	0.11799
GO_MICROTUBULE_SEVERING_ATPASE_ACTIVITY	0.11799
GO_MICROTUBULE_MOTOR_ACTIVITY	0.11799
GO_G_PROTEIN_COUPLED_RECEPTOR_BINDING	0.11799
GO_FORMATION_OF_CYTOPLASMIC_TRANSLATION_INITIATION_COMPLEX	0.11799
GO_AORTIC_VALVE_DEVELOPMENT	0.11799
GO_ATRIAL_CARDIAC_MUSCLE_TISSUE_DEVELOPMENT	0.11799
GO_COMMON_PARTNER_SMAD_PROTEIN_PHOSPHORYLATION	0.11799
GO_NEGATIVE_REGULATION_OF_CELL_FATE_COMMITMENT	0.11799
GO_PROTEIN_OXIDATION	0.11799
GO_SURFACTANT_HOMEOSTASIS	0.11799
GO_KETONE_BODY_BIOSYNTHETIC_PROCESS	0.11799
GO_MEMBRANE_REPOLARIZATION_DURING_ACTION_POTENTIAL	0.11799
GO_TYPE_B_PANCREATIC_CELL_APOPTOTIC_PROCESS	0.11799
GO_RECEPTOR_LOCALIZATION_TO_SYNAPSE	0.11799
GO_REGULATION_OF_SYNAPTIC_VESICLE_CYCLE	0.11799
GO_POSITIVE_REGULATION_OF_AUTOPHAGOSOME_MATURATION	0.11799
GO_POSITIVE_REGULATION_OF_EPITHELIAL_CELL_DIFFERENTIATION_INVOLVED_IN_KIDNEY_DEVELOPMENT	0.11799
GO_INNER_ACROSOMAL_MEMBRANE	0.11799
GO_AXON_HILLOCK	0.11799
GO_POSTSYNAPTIC_ENDOCYTIC_ZONE	0.11799
GO_TROPONIN_I_BINDING	0.11799
GO_CYSTEINE_TYPE_ENDOPEPTIDASE_ACTIVITY_INVOLVED_IN_APOPTOTIC_SIGNALING_PATHWAY	0.11799
BIOCARTA_AKT_PATHWAY	0.123128
COLDREN_GEFITINIB_RESISTANCE_UP	0.123128
COLDREN_GEFITINIB_RESISTANCE_DN	0.123128
MCBRYAN_PUBERTAL_BREAST_5_6WK_DN	0.123128
LUCAS_HNF4A_TARGETS_UP	0.123128
RIZ_ERYTHROID_DIFFERENTIATION_HBZ	0.123128
MYLLYKANGAS_AMPLIFICATION_HOT_SPOT_18	0.123128
XU_AKT1_TARGETS_48HR	0.123128
FUNG_IL2_SIGNALING_2	0.123128
MORI_PLASMA_CELL_DN	0.123128
ZHENG_RESPONSE_TO_ARSENITE_UP	0.123128
WELCSH_BRCA1_TARGETS_DN	0.123128
GAVIN_FOXP3_TARGETS_CLUSTER_T7	0.123128
CLAUS_PGR_POSITIVE_MENINGIOMA_UP	0.123128
AMUNDSON_GAMMA_RADIATION_RESPONSE	0.123128
MARTINEZ_RB1_TARGETS_DN	0.123128
NAKAMURA_METASTASIS	0.123128
HUNSBERGER_EXERCISE_REGULATED_GENES	0.123128
LEE_SP4_THYMOCYTE	0.123128
GUTIERREZ_MULTIPLE_MYELOMA_UP	0.123128
PEDERSEN_METASTASIS_BY_ERBB2_ISOFORM_7	0.123128
LOPEZ_TRANSLATION_VIA_FN1_SIGNALING	0.123128
GO_POSITIVE_REGULATION_OF_ERYTHROCYTE_DIFFERENTIATION	0.123128
GO_NEGATIVE_REGULATION_OF_PROTEIN_TYROSINE_KINASE_ACTIVITY	0.123128
GO_REGULATION_OF_WATER_LOSS_VIA_SKIN	0.123128
GO_SYNAPTIC_VESICLE_CYCLE	0.123128
GO_CEREBELLAR_CORTEX_DEVELOPMENT	0.123128
GO_PROTEIN_LOCALIZATION_TO_CHROMOSOME_TELOMERIC_REGION	0.123128
GO_CARDIAC_RIGHT_VENTRICLE_MORPHOGENESIS	0.123128
GO_CENTRAL_NERVOUS_SYSTEM_NEURON_DIFFERENTIATION	0.123128
GO_REGULATION_OF_NEUROTRANSMITTER_TRANSPORT	0.123128
GO_MEMBRANE_PROTEIN_INTRACELLULAR_DOMAIN_PROTEOLYSIS	0.123128
GO_REGULATION_OF_PROTEIN_KINASE_C_SIGNALING	0.123128
GO_MUSCLE_SYSTEM_PROCESS	0.123128
GO_REGULATION_OF_TELOMERE_CAPPING	0.123128
GO_TELENCEPHALON_DEVELOPMENT	0.123128
GO_NEGATIVE_REGULATION_OF_POTASSIUM_ION_TRANSMEMBRANE_TRANSPORT	0.123128
GO_NEGATIVE_REGULATION_OF_CHONDROCYTE_DIFFERENTIATION	0.123128
GO_PIGMENT_ACCUMULATION	0.123128
GO_NUCLEAR_TRANSCRIPTIONAL_REPRESSOR_COMPLEX	0.123128
GO_ESCRT_COMPLEX	0.123128
GO_PROTEIN_KINASE_A_BINDING	0.123128
GO_RAN_GTPASE_BINDING	0.123128
GO_TELOMERIC_DNA_BINDING	0.123128
GO_GPI_ANCHOR_BIOSYNTHETIC_PROCESS	0.123128
GO_CARBOHYDRATE_MEDIATED_SIGNALING	0.123128
GO_PEPTIDYL_DIPHTHAMIDE_BIOSYNTHETIC_PROCESS_FROM_PEPTIDYL_HISTIDINE	0.123128
GO_POSITIVE_REGULATION_OF_FATTY_ACID_BETA_OXIDATION	0.123128
GO_NEGATIVE_REGULATION_OF_TOLL_LIKE_RECEPTOR_4_SIGNALING_PATHWAY	0.123128
GO_NEGATIVE_REGULATION_OF_ENDOTHELIAL_CELL_DIFFERENTIATION	0.123128
GO_ACTIVATED_T_CELL_PROLIFERATION	0.123128
GO_MACROPHAGE_INFLAMMATORY_PROTEIN_1_ALPHA_PRODUCTION	0.123128
GO_NEGATIVE_REGULATION_OF_MONOCYTE_CHEMOTACTIC_PROTEIN_1_PRODUCTION	0.123128
GO_RESPONSE_TO_INTERLEUKIN_17	0.123128
GO_INTESTINAL_LIPID_ABSORPTION	0.123128
GO_REGULATION_OF_PRESYNAPTIC_MEMBRANE_POTENTIAL	0.123128
GO_POSITIVE_REGULATION_OF_RIG_I_SIGNALING_PATHWAY	0.123128
GO_POSITIVE_REGULATION_OF_OSTEOCLAST_DEVELOPMENT	0.123128
GO_RNA_POLYMERASE_II_CORE_COMPLEX	0.123128
GO_LIPID_DROPLET	0.123128
GO_PEPTIDYL_PROLINE_DIOXYGENASE_ACTIVITY	0.123128
GO_UBIQUITIN_PROTEIN_TRANSFERASE_INHIBITOR_ACTIVITY	0.123128
GO_VOLTAGE_GATED_CALCIUM_CHANNEL_ACTIVITY_INVOLVED_IN_REGULATION_OF_CYTOSOLIC_CALCIUM_LEVELS	0.123128
BIOCARTA_ARF_PATHWAY	0.128433
PID_P75_NTR_PATHWAY	0.128433
REACTOME_GLYCOLYSIS	0.128433
REACTOME_PROCESSIVE_SYNTHESIS_ON_THE_LAGGING_STRAND	0.128433
REACTOME_GLUCONEOGENESIS	0.128433
REACTOME_THE_NLRP3_INFLAMMASOME	0.128433
REACTOME_NONSENSE_MEDIATED_DECAY_ENHANCED_BY_THE_EXON_JUNCTION_COMPLEX	0.128433
REACTOME_FGFR1_LIGAND_BINDING_AND_ACTIVATION	0.128433
CREIGHTON_AKT1_SIGNALING_VIA_MTOR_UP	0.128433
GAUSSMANN_MLL_AF4_FUSION_TARGETS_E_DN	0.128433
SIMBULAN_UV_RESPONSE_NORMAL_UP	0.128433
SPIELMAN_LYMPHOBLAST_EUROPEAN_VS_ASIAN_2FC_UP	0.128433
LEE_LIVER_CANCER_ACOX1_DN	0.128433
FLECHNER_PBL_KIDNEY_TRANSPLANT_OK_VS_DONOR_DN	0.128433
LEE_LIVER_CANCER_CIPROFIBRATE_UP	0.128433
YE_METASTATIC_LIVER_CANCER	0.128433
WEIGEL_OXIDATIVE_STRESS_RESPONSE	0.128433
CUI_TCF21_TARGETS_2_UP	0.128433
BOYLAN_MULTIPLE_MYELOMA_C_CLUSTER_UP	0.128433
YAMANAKA_GLIOBLASTOMA_SURVIVAL_DN	0.128433
GUTIERREZ_WALDENSTROEMS_MACROGLOBULINEMIA_1_UP	0.128433
BROWNE_HCMV_INFECTION_1HR_DN	0.128433
YANG_BCL3_TARGETS_DN	0.128433
PLASARI_TGFB1_TARGETS_1HR_UP	0.128433
FLORIO_HUMAN_NEOCORTEX	0.128433
GO_POSITIVE_REGULATION_OF_GENE_EXPRESSION_EPIGENETIC	0.128433
GO_NEGATIVE_REGULATION_OF_PEPTIDYL_TYROSINE_PHOSPHORYLATION	0.128433
GO_POSITIVE_REGULATION_OF_GLIAL_CELL_DIFFERENTIATION	0.128433
GO_XENOPHAGY	0.128433
GO_REGULATION_OF_SYNAPTIC_PLASTICITY	0.128433
GO_PROTEIN_STABILIZATION	0.128433
GO_REGULATION_OF_LYMPHOCYTE_CHEMOTAXIS	0.128433
GO_MAMMARY_GLAND_DEVELOPMENT	0.128433
GO_CRANIAL_SKELETAL_SYSTEM_DEVELOPMENT	0.128433
GO_CELLULAR_RESPONSE_TO_NUTRIENT	0.128433
GO_ACIDIC_AMINO_ACID_TRANSPORT	0.128433
GO_GDP_METABOLIC_PROCESS	0.128433
GO_REGULATION_OF_NEUROTRANSMITTER_UPTAKE	0.128433
GO_CERAMIDE_METABOLIC_PROCESS	0.128433
GO_REGULATION_OF_OXIDATIVE_STRESS_INDUCED_CELL_DEATH	0.128433
GO_DORSAL_VENTRAL_AXIS_SPECIFICATION	0.128433
GO_MEMBRANE_REPOLARIZATION	0.128433
GO_POSITIVE_REGULATION_OF_SMALL_GTPASE_MEDIATED_SIGNAL_TRANSDUCTION	0.128433
GO_PROTEIN_TARGETING_TO_MITOCHONDRION	0.128433
GO_TRANSCRIPTIONAL_REPRESSOR_COMPLEX	0.128433
GO_ISOPRENOID_BINDING	0.128433
GO_PURINE_NUCLEOSIDE_DIPHOSPHATE_METABOLIC_PROCESS	0.128433
GO_ECTODERMAL_CELL_DIFFERENTIATION	0.128433
GO_GROWTH_HORMONE_SECRETION	0.128433
GO_HISTONE_H3_K4_DEMETHYLATION	0.128433
GO_POSITIVE_REGULATION_OF_ISOTYPE_SWITCHING	0.128433
GO_REGULATION_OF_SKELETAL_MUSCLE_FIBER_DEVELOPMENT	0.128433
GO_NEGATIVE_REGULATION_OF_SYNAPSE_ASSEMBLY	0.128433
GO_REGULATION_OF_BRANCHING_INVOLVED_IN_SALIVARY_GLAND_MORPHOGENESIS	0.128433
GO_ESTABLISHMENT_OF_BLOOD_BRAIN_BARRIER	0.128433
GO_HISTONE_H3_K27_METHYLATION	0.128433
GO_VESICLE_MEDIATED_TRANSPORT_IN_SYNAPSE	0.128433
GO_REGULATION_OF_POSTSYNAPTIC_SPECIALIZATION_ASSEMBLY	0.128433
GO_PROTEIN_LOCALIZATION_TO_AXON	0.128433
GO_REGULATION_OF_RECEPTOR_LOCALIZATION_TO_SYNAPSE	0.128433
GO_NEGATIVE_REGULATION_OF_ESTABLISHMENT_OF_PROTEIN_LOCALIZATION_TO_MITOCHONDRION	0.128433
GO_POSITIVE_REGULATION_OF_UBIQUITIN_PROTEIN_LIGASE_ACTIVITY	0.128433
GO_NEGATIVE_REGULATION_OF_CARDIAC_MUSCLE_CELL_DIFFERENTIATION	0.128433
GO_PLATELET_DENSE_GRANULE_MEMBRANE	0.128433
GO_CALYX_OF_HELD	0.128433
GO_U2_TYPE_CATALYTIC_STEP_2_SPLICEOSOME	0.128433
GO_NEUROTRANSMITTER_RECEPTOR_COMPLEX	0.128433
GO_PRESYNAPTIC_CYTOSOL	0.128433
GO_INTERLEUKIN_6_RECEPTOR_BINDING	0.128433
GO_OUTWARD_RECTIFIER_POTASSIUM_CHANNEL_ACTIVITY	0.128433
GO_UBIQUITIN_PROTEIN_TRANSFERASE_ACTIVATOR_ACTIVITY	0.128433
GO_S_ADENOSYL_L_METHIONINE_BINDING	0.128433
BIOCARTA_HIVNEF_PATHWAY	0.133908
PID_AJDISS_2PATHWAY	0.133908
REACTOME_ACTIVATED_POINT_MUTANTS_OF_FGFR2	0.133908
REACTOME_RETROGRADE_NEUROTROPHIN_SIGNALLING	0.133908
REACTOME_N_GLYCAN_TRIMMING_IN_THE_ER_AND_CALNEXIN_CALRETICULIN_CYCLE	0.133908
LIU_SOX4_TARGETS_DN	0.133908
JAEGER_METASTASIS_DN	0.133908
KOINUMA_COLON_CANCER_MSI_DN	0.133908
MARKEY_RB1_CHRONIC_LOF_UP	0.133908
MCBRYAN_PUBERTAL_BREAST_4_5WK_UP	0.133908
OLSSON_E2F3_TARGETS_UP	0.133908
TURJANSKI_MAPK1_AND_MAPK2_TARGETS	0.133908
ROPERO_HDAC2_TARGETS	0.133908
AMIT_EGF_RESPONSE_120_MCF10A	0.133908
KAUFFMANN_DNA_REPLICATION_GENES	0.133908
GENTILE_UV_RESPONSE_CLUSTER_D6	0.133908
ZHANG_RESPONSE_TO_CANTHARIDIN_DN	0.133908
GENTILE_UV_HIGH_DOSE_DN	0.133908
MONNIER_POSTRADIATION_TUMOR_ESCAPE_UP	0.133908
IWANAGA_CARCINOGENESIS_BY_KRAS_PTEN_UP	0.133908
AMBROSINI_FLAVOPIRIDOL_TREATMENT_TP53	0.133908
SHARMA_PILOCYTIC_ASTROCYTOMA_LOCATION_DN	0.133908
BOYAULT_LIVER_CANCER_SUBCLASS_G6_DN	0.133908
YAGI_AML_WITH_T_8_21_TRANSLOCATION	0.133908
FONTAINE_THYROID_TUMOR_UNCERTAIN_MALIGNANCY_DN	0.133908
BAUS_TFF2_TARGETS_DN	0.133908
GO_NEUROMUSCULAR_JUNCTION_DEVELOPMENT	0.133908
GO_GLUTAMATE_SECRETION	0.133908
GO_REGULATION_OF_SYSTEMIC_ARTERIAL_BLOOD_PRESSURE_BY_CIRCULATORY_RENIN_ANGIOTENSIN	0.133908
GO_POSITIVE_REGULATION_OF_PROTEIN_TYROSINE_KINASE_ACTIVITY	0.133908
GO_PHOSPHOLIPASE_C_ACTIVATING_G_PROTEIN_COUPLED_RECEPTOR_SIGNALING_PATHWAY	0.133908
GO_POSITIVE_REGULATION_OF_PROTEIN_AUTOPHOSPHORYLATION	0.133908
GO_REGULATION_OF_HISTONE_H3_K9_METHYLATION	0.133908
GO_POSITIVE_REGULATION_OF_CARDIAC_MUSCLE_TISSUE_DEVELOPMENT	0.133908
GO_REGULATION_OF_MUSCLE_HYPERTROPHY	0.133908
GO_POSITIVE_REGULATION_OF_IMMUNOGLOBULIN_PRODUCTION	0.133908
GO_CHONDROITIN_SULFATE_CATABOLIC_PROCESS	0.133908
GO_FAT_CELL_DIFFERENTIATION	0.133908
GO_CELL_AGING	0.133908
GO_COENZYME_CATABOLIC_PROCESS	0.133908
GO_CELLULAR_RESPONSE_TO_ESTRADIOL_STIMULUS	0.133908
GO_REGULATION_OF_TRANSMISSION_OF_NERVE_IMPULSE	0.133908
GO_RESPONSE_TO_COBALT_ION	0.133908
GO_REGULATION_OF_SYNAPTIC_VESICLE_TRANSPORT	0.133908
GO_PROTEASOME_REGULATORY_PARTICLE_BASE_SUBCOMPLEX	0.133908
GO_SMALL_RIBOSOMAL_SUBUNIT	0.133908
GO_MICROTUBULE_PLUS_END	0.133908
GO_ESCRT_III_COMPLEX	0.133908
GO_OMEGA_PEPTIDASE_ACTIVITY	0.133908
GO_REPLICATIVE_CELL_AGING	0.133908
GO_NEGATIVE_REGULATION_OF_RECEPTOR_INTERNALIZATION	0.133908
GO_RIBOSOMAL_PROTEIN_IMPORT_INTO_NUCLEUS	0.133908
GO_RESPONSE_TO_MYCOTOXIN	0.133908
GO_VIRAL_TRANSLATION	0.133908
GO_REGULATION_OF_LUTEINIZING_HORMONE_SECRETION	0.133908
GO_SPERMATOGENESIS_EXCHANGE_OF_CHROMOSOMAL_PROTEINS	0.133908
GO_MITOCHONDRIAL_DNA_REPAIR	0.133908
GO_TRACHEA_FORMATION	0.133908
GO_NUCLEAR_NCRNA_SURVEILLANCE	0.133908
GO_SPINDLE_ASSEMBLY_INVOLVED_IN_MEIOSIS	0.133908
GO_EXPORT_ACROSS_PLASMA_MEMBRANE	0.133908
GO_REGULATION_OF_EATING_BEHAVIOR	0.133908
GO_POSITIVE_REGULATION_OF_TORC1_SIGNALING	0.133908
GO_POSITIVE_REGULATION_OF_UBIQUITIN_DEPENDENT_PROTEIN_CATABOLIC_PROCESS	0.133908
GO_NEGATIVE_REGULATION_OF_T_CELL_MIGRATION	0.133908
GO_FLOTILLIN_COMPLEX	0.133908
GO_EUKARYOTIC_48S_PREINITIATION_COMPLEX	0.133908
GO_CILIARY_TRANSITION_FIBER	0.133908
GO_PHOSPHATIDYLINOSITOL_3_KINASE_REGULATORY_SUBUNIT_BINDING	0.133908
GO_POLYSOME_BINDING	0.133908
KEGG_PYRUVATE_METABOLISM	0.139557
BIOCARTA_IGF1MTOR_PATHWAY	0.139557
BIOCARTA_VEGF_PATHWAY	0.139557
WNT_SIGNALING	0.139557
REACTOME_BASIGIN_INTERACTIONS	0.139557
REACTOME_TRANSLOCATION_OF_ZAP_70_TO_IMMUNOLOGICAL_SYNAPSE	0.139557
REACTOME_G1_PHASE	0.139557
HUTTMANN_B_CLL_POOR_SURVIVAL_UP	0.139557
SMIRNOV_CIRCULATING_ENDOTHELIOCYTES_IN_CANCER_DN	0.139557
DARWICHE_SKIN_TUMOR_PROMOTER_DN	0.139557
MYLLYKANGAS_AMPLIFICATION_HOT_SPOT_5	0.139557
WATTEL_AUTONOMOUS_THYROID_ADENOMA_DN	0.139557
DIERICK_SEROTONIN_FUNCTION_GENES	0.139557
WU_CELL_MIGRATION	0.139557
AMIT_EGF_RESPONSE_60_HELA	0.139557
GUO_HEX_TARGETS_UP	0.139557
ZHAN_MULTIPLE_MYELOMA_UP	0.139557
SATO_SILENCED_BY_METHYLATION_IN_PANCREATIC_CANCER_2	0.139557
SCHLINGEMANN_SKIN_CARCINOGENESIS_TPA_DN	0.139557
HU_GENOTOXIC_DAMAGE_4HR	0.139557
HELLER_HDAC_TARGETS_DN	0.139557
SMID_BREAST_CANCER_RELAPSE_IN_LIVER_UP	0.139557
LE_SKI_TARGETS_DN	0.139557
BREDEMEYER_RAG_SIGNALING_VIA_ATM_NOT_VIA_NFKB_DN	0.139557
CROMER_TUMORIGENESIS_DN	0.139557
HSIAO_HOUSEKEEPING_GENES	0.139557
VALK_AML_CLUSTER_8	0.139557
VALK_AML_CLUSTER_16	0.139557
MIKKELSEN_MCV6_HCP_WITH_H3K27ME3	0.139557
KYNG_NORMAL_AGING_DN	0.139557
ZEMBUTSU_SENSITIVITY_TO_CISPLATIN	0.139557
JUBAN_TARGETS_OF_SPI1_AND_FLI1_UP	0.139557
GO_HEMOGLOBIN_METABOLIC_PROCESS	0.139557
GO_RESPONSE_TO_AMMONIUM_ION	0.139557
GO_WHITE_FAT_CELL_DIFFERENTIATION	0.139557
GO_POSITIVE_REGULATION_OF_SUBSTRATE_ADHESION_DEPENDENT_CELL_SPREADING	0.139557
GO_REGULATION_OF_EPITHELIAL_CELL_DIFFERENTIATION	0.139557
GO_PHASIC_SMOOTH_MUSCLE_CONTRACTION	0.139557
GO_NEGATIVE_REGULATION_OF_RESPONSE_TO_EXTRACELLULAR_STIMULUS	0.139557
GO_REGULATION_OF_NEUROBLAST_PROLIFERATION	0.139557
GO_POSITIVE_REGULATION_OF_DNA_REPAIR	0.139557
GO_REGULATION_OF_INCLUSION_BODY_ASSEMBLY	0.139557
GO_POSITIVE_REGULATION_OF_MYELOID_CELL_DIFFERENTIATION	0.139557
GO_REGULATION_OF_ERYTHROCYTE_DIFFERENTIATION	0.139557
GO_NEGATIVE_REGULATION_OF_CARBOHYDRATE_METABOLIC_PROCESS	0.139557
GO_LYMPH_VESSEL_MORPHOGENESIS	0.139557
GO_REGULATION_OF_AMINO_ACID_TRANSPORT	0.139557
GO_HISTONE_H2A_ACETYLATION	0.139557
GO_REGULATION_OF_INTRACELLULAR_TRANSPORT	0.139557
GO_EXTRACELLULAR_MATRIX	0.139557
GO_PROTON_TRANSPORTING_TWO_SECTOR_ATPASE_COMPLEX_PROTON_TRANSPORTING_DOMAIN	0.139557
GO_T_TUBULE	0.139557
GO_SYNAPTIC_MEMBRANE	0.139557
GO_ATPASE_BINDING	0.139557
GO_HMG_BOX_DOMAIN_BINDING	0.139557
GO_CALMODULIN_DEPENDENT_PROTEIN_KINASE_ACTIVITY	0.139557
GO_MACROMOLECULE_TRANSMEMBRANE_TRANSPORTER_ACTIVITY	0.139557
GO_INSULIN_RECEPTOR_SUBSTRATE_BINDING	0.139557
GO_MONOSACCHARIDE_BINDING	0.139557
GO_PROTEIN_DEMETHYLATION	0.139557
GO_SUBSTRATE_DEPENDENT_CELL_MIGRATION_CELL_EXTENSION	0.139557
GO_REGULATION_OF_G_PROTEIN_COUPLED_RECEPTOR_SIGNALING_PATHWAY	0.139557
GO_DETECTION_OF_VIRUS	0.139557
GO_CEREBRAL_CORTEX_TANGENTIAL_MIGRATION	0.139557
GO_NUCLEAR_DNA_REPLICATION	0.139557
GO_NAD_BIOSYNTHESIS_VIA_NICOTINAMIDE_RIBOSIDE_SALVAGE_PATHWAY	0.139557
GO_GLUCOCORTICOID_SECRETION	0.139557
GO_NUCLEOLAR_LARGE_RRNA_TRANSCRIPTION_BY_RNA_POLYMERASE_I	0.139557
GO_PROTEIN_RETENTION_IN_GOLGI_APPARATUS	0.139557
GO_NUCLEOBASE_CATABOLIC_PROCESS	0.139557
GO_POSITIVE_REGULATION_OF_COLLATERAL_SPROUTING	0.139557
GO_ENDOTHELIAL_CELL_APOPTOTIC_PROCESS	0.139557
GO_CYTOSKELETAL_ANCHORING_AT_NUCLEAR_MEMBRANE	0.139557
GO_PROTEIN_TRANSPORT_WITHIN_PLASMA_MEMBRANE	0.139557
GO_CERAMIDE_1_PHOSPHATE_TRANSPORT	0.139557
GO_NEGATIVE_REGULATION_OF_SYNAPTIC_VESICLE_TRANSPORT	0.139557
GO_PHOSPHATIDYLINOSITOL_TRANSPORTER_ACTIVITY	0.139557
GO_ADP_RIBOSYLATION_FACTOR_BINDING	0.139557
GO_U1_SNRNA_BINDING	0.139557
GO_NUCLEOSIDE_MONOPHOSPHATE_KINASE_ACTIVITY	0.139557
GO_RNA_POLYMERASE_II_C_TERMINAL_DOMAIN_BINDING	0.139557
GO_CERAMIDE_1_PHOSPHATE_BINDING	0.139557
KEGG_NEUROACTIVE_LIGAND_RECEPTOR_INTERACTION	0.145381
BIOCARTA_ATRBRCA_PATHWAY	0.145381
BIOCARTA_WNT_PATHWAY	0.145381
PID_FGF_PATHWAY	0.145381
REACTOME_GROWTH_HORMONE_RECEPTOR_SIGNALING	0.145381
REACTOME_PROLACTIN_RECEPTOR_SIGNALING	0.145381
REACTOME_APC_C_CDC20_MEDIATED_DEGRADATION_OF_CYCLIN_B	0.145381
ROY_WOUND_BLOOD_VESSEL_DN	0.145381
BAKER_HEMATOPOIESIS_STAT3_TARGETS	0.145381
SCHLOSSER_SERUM_RESPONSE_AUGMENTED_BY_MYC	0.145381
WILLIAMS_ESR1_TARGETS_DN	0.145381
SCHAEFFER_PROSTATE_DEVELOPMENT_48HR_DN	0.145381
BYSTRYKH_HEMATOPOIESIS_STEM_CELL_AND_BRAIN_QTL_CIS	0.145381
LEIN_NEURON_MARKERS	0.145381
GAVIN_IL2_RESPONSIVE_FOXP3_TARGETS_UP	0.145381
BEIER_GLIOMA_STEM_CELL_UP	0.145381
VALK_AML_CLUSTER_13	0.145381
KORKOLA_EMBRYONIC_CARCINOMA_VS_SEMINOMA_DN	0.145381
BRUINS_UVC_RESPONSE_MIDDLE	0.145381
VANOEVELEN_MYOGENESIS_SIN3A_TARGETS	0.145381
ALTEMEIER_RESPONSE_TO_LPS_WITH_MECHANICAL_VENTILATION	0.145381
GO_ACID_SECRETION	0.145381
GO_OUTFLOW_TRACT_SEPTUM_MORPHOGENESIS	0.145381
GO_REGULATION_OF_PODOSOME_ASSEMBLY	0.145381
GO_NEUROTRANSMITTER_UPTAKE	0.145381
GO_REGULATION_OF_DEVELOPMENTAL_GROWTH	0.145381
GO_HYDROGEN_PEROXIDE_CATABOLIC_PROCESS	0.145381
GO_PEPTIDE_CROSS_LINKING	0.145381
GO_POSITIVE_REGULATION_OF_CHOLESTEROL_EFFLUX	0.145381
GO_DRUG_TRANSMEMBRANE_TRANSPORT	0.145381
GO_DNA_DEALKYLATION	0.145381
GO_MACROAUTOPHAGY	0.145381
GO_PORPHYRIN_CONTAINING_COMPOUND_METABOLIC_PROCESS	0.145381
GO_EMBRYONIC_VISCEROCRANIUM_MORPHOGENESIS	0.145381
GO_PROTEIN_LOCALIZATION_TO_CHROMATIN	0.145381
GO_ORGAN_GROWTH	0.145381
GO_ACTION_POTENTIAL	0.145381
GO_RHYTHMIC_BEHAVIOR	0.145381
GO_POSITIVE_REGULATION_OF_NEURON_MIGRATION	0.145381
GO_DEVELOPMENTAL_CELL_GROWTH	0.145381
GO_PROTEIN_LOCALIZATION_TO_SYNAPSE	0.145381
GO_POSITIVE_REGULATION_OF_STEM_CELL_PROLIFERATION	0.145381
GO_NEGATIVE_CHEMOTAXIS	0.145381
GO_PHOSPHOPROTEIN_BINDING	0.145381
GO_SIGNAL_SEQUENCE_BINDING	0.145381
GO_E_BOX_BINDING	0.145381
GO_MANNOSYLTRANSFERASE_ACTIVITY	0.145381
GO_TRICUSPID_VALVE_MORPHOGENESIS	0.145381
GO_CARDIAC_NEURAL_CREST_CELL_MIGRATION_INVOLVED_IN_OUTFLOW_TRACT_MORPHOGENESIS	0.145381
GO_PUTRESCINE_BIOSYNTHETIC_PROCESS	0.145381
GO_AXON_CHOICE_POINT_RECOGNITION	0.145381
GO_POSITIVE_REGULATION_OF_CYCLASE_ACTIVITY	0.145381
GO_POSITIVE_REGULATION_OF_GONADOTROPIN_SECRETION	0.145381
GO_POSITIVE_REGULATION_OF_ACTIVIN_RECEPTOR_SIGNALING_PATHWAY	0.145381
GO_SNORNA_PROCESSING	0.145381
GO_POSITIVE_REGULATION_OF_CILIUM_ASSEMBLY	0.145381
GO_SALIVA_SECRETION	0.145381
GO_REGULATION_OF_VESICLE_TARGETING_TO_FROM_OR_WITHIN_GOLGI	0.145381
GO_POSITIVE_REGULATION_OF_TYPE_I_INTERFERON_MEDIATED_SIGNALING_PATHWAY	0.145381
GO_MORPHOGENESIS_OF_AN_EPITHELIAL_BUD	0.145381
GO_IRIS_MORPHOGENESIS	0.145381
GO_URETER_MORPHOGENESIS	0.145381
GO_RESPONSE_TO_ANESTHETIC	0.145381
GO_POSITIVE_REGULATION_OF_CELL_MIGRATION_INVOLVED_IN_SPROUTING_ANGIOGENESIS	0.145381
GO_LYSOSOMAL_PROTEIN_CATABOLIC_PROCESS	0.145381
GO_CELLULAR_RESPONSE_TO_LEUCINE_STARVATION	0.145381
GO_POSITIVE_REGULATION_OF_CAMP_DEPENDENT_PROTEIN_KINASE_ACTIVITY	0.145381
GO_THO_COMPLEX	0.145381
GO_POLAR_MICROTUBULE	0.145381
GO_SARCOPLASMIC_RETICULUM_LUMEN	0.145381
GO_RDNA_HETEROCHROMATIN	0.145381
GO_CALCIUM_CATION_ANTIPORTER_ACTIVITY	0.145381
GO_IGE_BINDING	0.145381
KEGG_ASTHMA	0.151385
PID_IGF1_PATHWAY	0.151385
PID_IL5_PATHWAY	0.151385
REACTOME_GAP_JUNCTION_DEGRADATION	0.151385
REACTOME_SIGNALING_BY_NOTCH3	0.151385
REACTOME_AXON_GUIDANCE	0.151385
REACTOME_ACTIVATED_TAK1_MEDIATES_P38_MAPK_ACTIVATION	0.151385
REACTOME_LAGGING_STRAND_SYNTHESIS	0.151385
REACTOME_INWARDLY_RECTIFYING_K_CHANNELS	0.151385
REACTOME_EXTENSION_OF_TELOMERES	0.151385
NAKAMURA_CANCER_MICROENVIRONMENT_DN	0.151385
HOLLMANN_APOPTOSIS_VIA_CD40_UP	0.151385
FRASOR_TAMOXIFEN_RESPONSE_UP	0.151385
CASORELLI_ACUTE_PROMYELOCYTIC_LEUKEMIA_UP	0.151385
VECCHI_GASTRIC_CANCER_EARLY_UP	0.151385
YEMELYANOV_GR_TARGETS_DN	0.151385
HU_ANGIOGENESIS_DN	0.151385
TURJANSKI_MAPK8_AND_MAPK9_TARGETS	0.151385
HUMMERICH_SKIN_CANCER_PROGRESSION_DN	0.151385
EBAUER_MYOGENIC_TARGETS_OF_PAX3_FOXO1_FUSION	0.151385
SCHLOSSER_MYC_TARGETS_AND_SERUM_RESPONSE_UP	0.151385
GUENTHER_GROWTH_SPHERICAL_VS_ADHERENT_DN	0.151385
KENNY_CTNNB1_TARGETS_UP	0.151385
ZHANG_TARGETS_OF_EWSR1_FLI1_FUSION	0.151385
RUAN_RESPONSE_TO_TNF_TROGLITAZONE_DN	0.151385
BURTON_ADIPOGENESIS_PEAK_AT_24HR	0.151385
DEBIASI_APOPTOSIS_BY_REOVIRUS_INFECTION_DN	0.151385
YANG_MUC2_TARGETS_DUODENUM_6MO_UP	0.151385
MISHRA_CARCINOMA_ASSOCIATED_FIBROBLAST_DN	0.151385
ZHENG_GLIOBLASTOMA_PLASTICITY_DN	0.151385
RAY_TARGETS_OF_P210_BCR_ABL_FUSION_DN	0.151385
FINAK_BREAST_CANCER_SDPP_SIGNATURE	0.151385
DELPUECH_FOXO3_TARGETS_UP	0.151385
GO_CELLULAR_RESPONSE_TO_CADMIUM_ION	0.151385
GO_CELL_MIGRATION_INVOLVED_IN_SPROUTING_ANGIOGENESIS	0.151385
GO_NEGATIVE_REGULATION_OF_NOTCH_SIGNALING_PATHWAY	0.151385
GO_SEQUESTERING_OF_METAL_ION	0.151385
GO_B_CELL_MEDIATED_IMMUNITY	0.151385
GO_PARENTAL_BEHAVIOR	0.151385
GO_PROTEIN_ADP_RIBOSYLATION	0.151385
GO_DICARBOXYLIC_ACID_TRANSPORT	0.151385
GO_ACTIVATION_OF_MAPKKK_ACTIVITY	0.151385
GO_RESPONSE_TO_EPINEPHRINE	0.151385
GO_SPERMATID_DIFFERENTIATION	0.151385
GO_POSITIVE_REGULATION_OF_LIPID_STORAGE	0.151385
GO_RNA_PHOSPHODIESTER_BOND_HYDROLYSIS_EXONUCLEOLYTIC	0.151385
GO_LIMBIC_SYSTEM_DEVELOPMENT	0.151385
GO_REGULATION_OF_AXONOGENESIS	0.151385
GO_POTASSIUM_CHANNEL_COMPLEX	0.151385
GO_EXOSOME_RNASE_COMPLEX_	0.151385
GO_NBAF_COMPLEX	0.151385
GO_DIOXYGENASE_ACTIVITY	0.151385
GO_SODIUM_INDEPENDENT_ORGANIC_ANION_TRANSMEMBRANE_TRANSPORTER_ACTIVITY	0.151385
GO_CHEMOREPELLENT_ACTIVITY	0.151385
GO_G_PROTEIN_COUPLED_CHEMOATTRACTANT_RECEPTOR_ACTIVITY	0.151385
GO_PROTEIN_TYROSINE_KINASE_ACTIVATOR_ACTIVITY	0.151385
GO_PYRIMIDINE_RIBONUCLEOTIDE_BIOSYNTHETIC_PROCESS	0.151385
GO_INTESTINE_SMOOTH_MUSCLE_CONTRACTION	0.151385
GO_HYPOTHALAMUS_CELL_DIFFERENTIATION	0.151385
GO_REGULATION_OF_INTRACELLULAR_LIPID_TRANSPORT	0.151385
GO_POSITIVE_REGULATION_OF_GLUCOKINASE_ACTIVITY	0.151385
GO_GASTRIC_MOTILITY	0.151385
GO_FAT_SOLUBLE_VITAMIN_BIOSYNTHETIC_PROCESS	0.151385
GO_POSITIVE_REGULATION_OF_TRANSCRIPTION_BY_RNA_POLYMERASE_III	0.151385
GO_HEPATOCYTE_GROWTH_FACTOR_RECEPTOR_SIGNALING_PATHWAY	0.151385
GO_MICROTUBULE_SEVERING	0.151385
GO_KINETOCHORE_ASSEMBLY	0.151385
GO_MICROTUBULE_NUCLEATION_BY_MICROTUBULE_ORGANIZING_CENTER	0.151385
GO_BUNDLE_OF_HIS_CELL_TO_PURKINJE_MYOCYTE_SIGNALING	0.151385
GO_REGULATION_OF_TRANS_SYNAPTIC_SIGNALING	0.151385
GO_REGULATION_OF_PROTEIN_K63_LINKED_UBIQUITINATION	0.151385
GO_POSITIVE_REGULATION_OF_OXIDATIVE_STRESS_INDUCED_INTRINSIC_APOPTOTIC_SIGNALING_PATHWAY	0.151385
GO_REGULATION_OF_APOPTOTIC_PROCESS_INVOLVED_IN_MORPHOGENESIS	0.151385
GO_FOLATE_IMPORT_ACROSS_PLASMA_MEMBRANE	0.151385
GO_REGULATION_OF_CHAPERONE_MEDIATED_AUTOPHAGY	0.151385
GO_REGULATION_OF_APOPTOTIC_PROCESS_INVOLVED_IN_DEVELOPMENT	0.151385
GO_POSITIVE_REGULATION_OF_VASCULAR_ASSOCIATED_SMOOTH_MUSCLE_CELL_MIGRATION	0.151385
GO_BOX_C_D_SNORNP_COMPLEX	0.151385
GO_DENDRITIC_SPINE_MEMBRANE	0.151385
GO_PHAGOPHORE_ASSEMBLY_SITE_MEMBRANE	0.151385
GO_OUTER_DYNEIN_ARM	0.151385
GO_RAGULATOR_COMPLEX	0.151385
GO_GLUTAMATERGIC_SYNAPSE	0.151385
GO_PHOSPHORYLASE_ACTIVITY	0.151385
GO_SUPEROXIDE_GENERATING_NADPH_OXIDASE_ACTIVATOR_ACTIVITY	0.151385
GO_RAP_GUANYL_NUCLEOTIDE_EXCHANGE_FACTOR_ACTIVITY	0.151385
GO_SPHINGOSINE_N_ACYLTRANSFERASE_ACTIVITY	0.151385
GO_7SK_SNRNA_BINDING	0.151385
ST_P38_MAPK_PATHWAY	0.157569
PID_PTP1B_PATHWAY	0.157569
REACTOME_AMINO_ACID_TRANSPORT_ACROSS_THE_PLASMA_MEMBRANE	0.157569
REACTOME_CD28_DEPENDENT_VAV1_PATHWAY	0.157569
SCHUETZ_BREAST_CANCER_DUCTAL_INVASIVE_DN	0.157569
CHARAFE_BREAST_CANCER_BASAL_VS_MESENCHYMAL_DN	0.157569
KOKKINAKIS_METHIONINE_DEPRIVATION_48HR_UP	0.157569
CHIN_BREAST_CANCER_COPY_NUMBER_DN	0.157569
EBAUER_TARGETS_OF_PAX3_FOXO1_FUSION_UP	0.157569
LINDGREN_BLADDER_CANCER_HIGH_RECURRENCE	0.157569
KORKOLA_EMBRYONAL_CARCINOMA	0.157569
SPIELMAN_LYMPHOBLAST_EUROPEAN_VS_ASIAN_UP	0.157569
GROSS_HIF1A_TARGETS_DN	0.157569
ONDER_CDH1_TARGETS_2_DN	0.157569
RADAEVA_RESPONSE_TO_IFNA1_DN	0.157569
MONNIER_POSTRADIATION_TUMOR_ESCAPE_DN	0.157569
BUCKANOVICH_T_LYMPHOCYTE_HOMING_ON_TUMOR_DN	0.157569
WANG_TUMOR_INVASIVENESS_DN	0.157569
FIGUEROA_AML_METHYLATION_CLUSTER_3_UP	0.157569
OHGUCHI_LIVER_HNF4A_TARGETS_UP	0.157569
KIM_TIAL1_TARGETS	0.157569
RAO_BOUND_BY_SALL4	0.157569
GO_MEIOTIC_CHROMOSOME_SEGREGATION	0.157569
GO_NEGATIVE_REGULATION_OF_ERK1_AND_ERK2_CASCADE	0.157569
GO_CELLULAR_MODIFIED_AMINO_ACID_CATABOLIC_PROCESS	0.157569
GO_REGULATION_OF_SERINE_TYPE_PEPTIDASE_ACTIVITY	0.157569
GO_POSITIVE_REGULATION_OF_VIRAL_GENOME_REPLICATION	0.157569
GO_PHOSPHATIDYLGLYCEROL_METABOLIC_PROCESS	0.157569
GO_PEPTIDYL_PROLINE_HYDROXYLATION	0.157569
GO_POSITIVE_REGULATION_OF_HISTONE_DEACETYLATION	0.157569
GO_SMOOTH_MUSCLE_TISSUE_DEVELOPMENT	0.157569
GO_REGULATION_OF_PROTEIN_MODIFICATION_BY_SMALL_PROTEIN_CONJUGATION_OR_REMOVAL	0.157569
GO_MONOCARBOXYLIC_ACID_TRANSPORT	0.157569
GO_VACUOLE_ORGANIZATION	0.157569
GO_HINDBRAIN_MORPHOGENESIS	0.157569
GO_POSITIVE_REGULATION_OF_SYNAPTIC_TRANSMISSION	0.157569
GO_NEUROEPITHELIAL_CELL_DIFFERENTIATION	0.157569
GO_THIOESTER_BIOSYNTHETIC_PROCESS	0.157569
GO_NEGATIVE_REGULATION_OF_OSSIFICATION	0.157569
GO_PROSTATE_GLAND_DEVELOPMENT	0.157569
GO_RESPONSE_TO_WATER	0.157569
GO_AZOLE_TRANSPORT	0.157569
GO_REGULATION_OF_ODONTOGENESIS_OF_DENTIN_CONTAINING_TOOTH	0.157569
GO_CARDIAC_CELL_DEVELOPMENT	0.157569
GO_TRANS_GOLGI_NETWORK_TRANSPORT_VESICLE_MEMBRANE	0.157569
GO_GLYCINE_BINDING	0.157569
GO_GDP_DISSOCIATION_INHIBITOR_ACTIVITY	0.157569
GO_POTASSIUM_ION_BINDING	0.157569
GO_MYOSIN_V_BINDING	0.157569
GO_OXIDOREDUCTASE_ACTIVITY_ACTING_ON_PAIRED_DONORS_WITH_INCORPORATION_OR_REDUCTION_OF_MOLECULAR_OXYGEN_REDUCED_FLAVIN_OR_FLAVOPROTEIN_AS_ONE_DONOR_AND_INCORPORATION_OF_ONE_ATOM_OF_OXYGEN	0.157569
GO_AGGRESSIVE_BEHAVIOR	0.157569
GO_SOMATIC_DIVERSIFICATION_OF_IMMUNE_RECEPTORS_VIA_GERMLINE_RECOMBINATION_WITHIN_A_SINGLE_LOCUS	0.157569
GO_PEPTIDYL_ARGININE_METHYLATION_TO_ASYMMETRICAL_DIMETHYL_ARGININE	0.157569
GO_CEREBELLAR_PURKINJE_CELL_GRANULE_CELL_PRECURSOR_CELL_SIGNALING_INVOLVED_IN_REGULATION_OF_GRANULE_CELL_PRECURSOR_CELL_PROLIFERATION	0.157569
GO_TRIGLYCERIDE_RICH_LIPOPROTEIN_PARTICLE_REMODELING	0.157569
GO_NEGATIVE_REGULATION_OF_ERYTHROCYTE_DIFFERENTIATION	0.157569
GO_CELLULAR_KETONE_BODY_METABOLIC_PROCESS	0.157569
GO_PARATHYROID_GLAND_DEVELOPMENT	0.157569
GO_REGULATION_OF_PHOSPHATIDYLINOSITOL_DEPHOSPHORYLATION	0.157569
GO_UBIQUITIN_DEPENDENT_ENDOCYTOSIS	0.157569
GO_FAT_CELL_PROLIFERATION	0.157569
GO_NEGATIVE_REGULATION_OF_GLYCOGEN_METABOLIC_PROCESS	0.157569
GO_OTIC_VESICLE_MORPHOGENESIS	0.157569
GO_ODONTOBLAST_DIFFERENTIATION	0.157569
GO_IMPORT_ACROSS_PLASMA_MEMBRANE	0.157569
GO_NEGATIVE_REGULATION_OF_PROTEIN_TARGETING_TO_MITOCHONDRION	0.157569
GO_REGULATION_OF_LIPOPHAGY	0.157569
GO_REGULATION_OF_DENDRITIC_CELL_CHEMOTAXIS	0.157569
GO_U6_SNRNP	0.157569
GO_SPERM_HEAD	0.157569
GO_LSM2_8_COMPLEX	0.157569
GO_CARBOHYDRATE_PROTON_SYMPORTER_ACTIVITY	0.157569
GO_TRANSLATION_TERMINATION_FACTOR_ACTIVITY	0.157569
GO_SODIUM_BICARBONATE_SYMPORTER_ACTIVITY	0.157569
GO_FOUR_WAY_JUNCTION_HELICASE_ACTIVITY	0.157569
GO_5_3_EXODEOXYRIBONUCLEASE_ACTIVITY	0.157569
GO_EPINEPHRINE_BINDING	0.157569
KEGG_MELANOMA	0.163937
REACTOME_NEF_MEDIATED_DOWNREGULATION_OF_MHC_CLASS_I_COMPLEX_CELL_SURFACE_EXPRESSION	0.163937
REACTOME_SMAD2_SMAD3_SMAD4_HETEROTRIMER_REGULATES_TRANSCRIPTION	0.163937
REACTOME_CELL_EXTRACELLULAR_MATRIX_INTERACTIONS	0.163937
REACTOME_INFLUENZA_VIRAL_RNA_TRANSCRIPTION_AND_REPLICATION	0.163937
REACTOME_GLUCOSE_METABOLISM	0.163937
LIU_SOX4_TARGETS_UP	0.163937
BASAKI_YBX1_TARGETS_UP	0.163937
TONKS_TARGETS_OF_RUNX1_RUNX1T1_FUSION_GRANULOCYTE_DN	0.163937
SABATES_COLORECTAL_ADENOMA_UP	0.163937
LANDIS_ERBB2_BREAST_TUMORS_65_UP	0.163937
DUNNE_TARGETS_OF_AML1_MTG8_FUSION_UP	0.163937
LASTOWSKA_COAMPLIFIED_WITH_MYCN	0.163937
STARK_PREFRONTAL_CORTEX_22Q11_DELETION_UP	0.163937
NIKOLSKY_BREAST_CANCER_8Q12_Q22_AMPLICON	0.163937
PENG_LEUCINE_DEPRIVATION_UP	0.163937
MUNSHI_MULTIPLE_MYELOMA_DN	0.163937
CHANG_IMMORTALIZED_BY_HPV31_DN	0.163937
SESTO_RESPONSE_TO_UV_C1	0.163937
HELLER_HDAC_TARGETS_SILENCED_BY_METHYLATION_UP	0.163937
IWANAGA_CARCINOGENESIS_BY_KRAS_UP	0.163937
RIZKI_TUMOR_INVASIVENESS_3D_UP	0.163937
VICENT_METASTASIS_UP	0.163937
MIKKELSEN_MCV6_LCP_WITH_H3K27ME3	0.163937
MIKKELSEN_ES_ICP_WITH_H3K27ME3	0.163937
KOHOUTEK_CCNT2_TARGETS	0.163937
ABRAMSON_INTERACT_WITH_AIRE	0.163937
GO_POSITIVE_REGULATION_OF_REPRODUCTIVE_PROCESS	0.163937
GO_TRANSITION_METAL_ION_TRANSPORT	0.163937
GO_MITOCHONDRIAL_TRANSPORT	0.163937
GO_STRIATED_MUSCLE_CELL_DIFFERENTIATION	0.163937
GO_CELL_DIFFERENTIATION_INVOLVED_IN_EMBRYONIC_PLACENTA_DEVELOPMENT	0.163937
GO_POLYSACCHARIDE_CATABOLIC_PROCESS	0.163937
GO_NEGATIVE_REGULATION_OF_AXON_GUIDANCE	0.163937
GO_MORPHOGENESIS_OF_AN_EPITHELIAL_FOLD	0.163937
GO_LEARNING	0.163937
GO_AMINO_SUGAR_METABOLIC_PROCESS	0.163937
GO_DNA_METHYLATION_OR_DEMETHYLATION	0.163937
GO_REGULATION_OF_POLYSACCHARIDE_METABOLIC_PROCESS	0.163937
GO_ZINC_ION_HOMEOSTASIS	0.163937
GO_NEGATIVE_REGULATION_OF_GLUCONEOGENESIS	0.163937
GO_REGULATION_OF_TELOMERASE_ACTIVITY	0.163937
GO_METAPHASE_PLATE_CONGRESSION	0.163937
GO_REGULATION_OF_PROTEIN_TARGETING	0.163937
GO_GLYCOPROTEIN_COMPLEX	0.163937
GO_ENDOCYTIC_VESICLE_LUMEN	0.163937
GO_SCHMIDT_LANTERMAN_INCISURE	0.163937
GO_TRANSCRIPTION_COFACTOR_BINDING	0.163937
GO_MOTOR_ACTIVITY	0.163937
GO_BASAL_TRANSCRIPTION_MACHINERY_BINDING	0.163937
GO_HISTONE_METHYLTRANSFERASE_ACTIVITY_H3_K4_SPECIFIC_	0.163937
GO_CALCIUM_CHANNEL_REGULATOR_ACTIVITY	0.163937
GO_CYSTEINE_TYPE_ENDOPEPTIDASE_ACTIVITY_INVOLVED_IN_APOPTOTIC_PROCESS	0.163937
GO_OVULATION_FROM_OVARIAN_FOLLICLE	0.163937
GO_BRANCHING_INVOLVED_IN_BLOOD_VESSEL_MORPHOGENESIS	0.163937
GO_ATRIOVENTRICULAR_VALVE_FORMATION	0.163937
GO_MITOTIC_NUCLEAR_ENVELOPE_DISASSEMBLY	0.163937
GO_PURINE_NUCLEOSIDE_DIPHOSPHATE_BIOSYNTHETIC_PROCESS	0.163937
GO_BRADYKININ_CATABOLIC_PROCESS	0.163937
GO_SYNAPTIC_VESICLE_EXOCYTOSIS	0.163937
GO_PROTEIN_O_LINKED_GLYCOSYLATION_VIA_SERINE	0.163937
GO_B_CELL_CHEMOTAXIS	0.163937
GO_EOSINOPHIL_MIGRATION	0.163937
GO_TUBULIN_DEACETYLATION	0.163937
GO_FOLATE_TRANSMEMBRANE_TRANSPORT	0.163937
GO_POSTSYNAPTIC_ACTIN_CYTOSKELETON_ORGANIZATION	0.163937
GO_POSTSYNAPTIC_CYTOSKELETON_ORGANIZATION	0.163937
GO_REGULATION_OF_AUTOPHAGOSOME_MATURATION	0.163937
GO_REGULATION_OF_SMOOTHENED_SIGNALING_PATHWAY_INVOLVED_IN_DORSAL_VENTRAL_NEURAL_TUBE_PATTERNING	0.163937
GO_NEGATIVE_REGULATION_OF_PROTEOLYSIS_INVOLVED_IN_CELLULAR_PROTEIN_CATABOLIC_PROCESS	0.163937
GO_REGULATION_OF_CELLULAR_RESPONSE_TO_MACROPHAGE_COLONY_STIMULATING_FACTOR_STIMULUS	0.163937
GO_REGULATION_OF_T_CELL_ACTIVATION_VIA_T_CELL_RECEPTOR_CONTACT_WITH_ANTIGEN_BOUND_TO_MHC_MOLECULE_ON_ANTIGEN_PRESENTING_CELL	0.163937
GO_F_ACTIN_CAPPING_PROTEIN_COMPLEX	0.163937
GO_ACYL_COA_OXIDASE_ACTIVITY	0.163937
GO_INTERLEUKIN_2_RECEPTOR_BINDING	0.163937
GO_BETA_GLUCOSIDASE_ACTIVITY	0.163937
GO_FATTY_ACID_TRANSMEMBRANE_TRANSPORTER_ACTIVITY	0.163937
GO_MORPHOGEN_ACTIVITY	0.163937
GO_TRNA_ADENINE_METHYLTRANSFERASE_ACTIVITY	0.163937
GO_CERAMIDE_TRANSPORTER_ACTIVITY	0.163937
GO_PROTEIN_KINASE_B_BINDING	0.163937
GO_NEURAL_CREST_CELL_MIGRATION_INVOLVED_IN_AUTONOMIC_NERVOUS_SYSTEM_DEVELOPMENT	0.164907
KEGG_TOLL_LIKE_RECEPTOR_SIGNALING_PATHWAY	0.170491
REACTOME_GLUCAGON_TYPE_LIGAND_RECEPTORS	0.170491
REACTOME_TRANSPORT_OF_VITAMINS_NUCLEOSIDES_AND_RELATED_MOLECULES	0.170491
REACTOME_INFLUENZA_LIFE_CYCLE	0.170491
PACHER_TARGETS_OF_IGF1_AND_IGF2_UP	0.170491
OLSSON_E2F3_TARGETS_DN	0.170491
LINDGREN_BLADDER_CANCER_WITH_LOH_IN_CHR9Q	0.170491
HEIDENBLAD_AMPLICON_8Q24_DN	0.170491
FRIDMAN_SENESCENCE_DN	0.170491
STARK_HYPPOCAMPUS_22Q11_DELETION_UP	0.170491
NIKOLSKY_BREAST_CANCER_21Q22_AMPLICON	0.170491
GOTTWEIN_TARGETS_OF_KSHV_MIR_K12_11	0.170491
CERVERA_SDHB_TARGETS_1_DN	0.170491
WONG_IFNA2_RESISTANCE_UP	0.170491
MCCLUNG_CREB1_TARGETS_DN	0.170491
NIELSEN_LIPOSARCOMA_DN	0.170491
JI_RESPONSE_TO_FSH_DN	0.170491
LIU_SMARCA4_TARGETS	0.170491
VERRECCHIA_RESPONSE_TO_TGFB1_C4	0.170491
CREIGHTON_ENDOCRINE_THERAPY_RESISTANCE_1	0.170491
KYNG_ENVIRONMENTAL_STRESS_RESPONSE_NOT_BY_UV_IN_WS	0.170491
MATZUK_PREOVULATORY_FOLLICLE	0.170491
GRADE_COLON_AND_RECTAL_CANCER_UP	0.170491
CHO_NR4A1_TARGETS	0.170491
BOYLAN_MULTIPLE_MYELOMA_C_CLUSTER_DN	0.170491
LI_DCP2_BOUND_MRNA	0.170491
IM_SREBF1A_TARGETS	0.170491
ACEVEDO_FGFR1_TARGETS_IN_PROSTATE_CANCER_MODEL_UP	0.170491
LIM_MAMMARY_LUMINAL_PROGENITOR_UP	0.170491
FLORIO_NEOCORTEX_BASAL_RADIAL_GLIA_UP	0.170491
GO_NEGATIVE_REGULATION_OF_PROTEIN_AUTOPHOSPHORYLATION	0.170491
GO_SYNAPSE_ORGANIZATION	0.170491
GO_REGULATION_OF_HISTONE_DEACETYLATION	0.170491
GO_POLYSACCHARIDE_METABOLIC_PROCESS	0.170491
GO_POSITIVE_REGULATION_OF_G1_S_TRANSITION_OF_MITOTIC_CELL_CYCLE	0.170491
GO_HISTONE_H3_K9_MODIFICATION	0.170491
GO_GLUCAN_METABOLIC_PROCESS	0.170491
GO_NEPHRIC_DUCT_DEVELOPMENT	0.170491
GO_NEURAL_CREST_CELL_MIGRATION	0.170491
GO_REGULATION_OF_FEEDING_BEHAVIOR	0.170491
GO_POSITIVE_REGULATION_OF_NIK_NF_KAPPAB_SIGNALING	0.170491
GO_CELLULAR_RESPONSE_TO_HYDROGEN_PEROXIDE	0.170491
GO_IMMUNOGLOBULIN_PRODUCTION	0.170491
GO_MUSCLE_ADAPTATION	0.170491
GO_CARDIAC_MUSCLE_TISSUE_DEVELOPMENT	0.170491
GO_PROTEIN_K63_LINKED_DEUBIQUITINATION	0.170491
GO_PURINE_CONTAINING_COMPOUND_CATABOLIC_PROCESS	0.170491
GO_RESPONSE_TO_GONADOTROPIN	0.170491
GO_ACTIVATION_OF_MAPK_ACTIVITY	0.170491
GO_NEGATIVE_REGULATION_OF_GLUCOSE_IMPORT	0.170491
GO_SYNCYTIUM_FORMATION	0.170491
GO_NODE_OF_RANVIER	0.170491
GO_U5_SNRNP	0.170491
GO_LATE_ENDOSOME	0.170491
GO_MISMATCH_REPAIR_COMPLEX	0.170491
GO_STAGA_COMPLEX	0.170491
GO_INTERCELLULAR_BRIDGE	0.170491
GO_GDP_BINDING	0.170491
GO_AMINO_ACID_TRANSMEMBRANE_TRANSPORTER_ACTIVITY	0.170491
GO_CARBOHYDRATE_KINASE_ACTIVITY	0.170491
GO_RAB_GUANYL_NUCLEOTIDE_EXCHANGE_FACTOR_ACTIVITY	0.170491
GO_REDUCTION_OF_FOOD_INTAKE_IN_RESPONSE_TO_DIETARY_EXCESS	0.170491
GO_LACTATE_METABOLIC_PROCESS	0.170491
GO_DNA_DAMAGE_INDUCED_PROTEIN_PHOSPHORYLATION	0.170491
GO_POSITIVE_REGULATION_OF_TRANSCRIPTION_OF_NOTCH_RECEPTOR_TARGET	0.170491
GO_NEGATIVE_REGULATION_OF_TRANSCRIPTION_BY_COMPETITIVE_PROMOTER_BINDING	0.170491
GO_REGULATION_OF_NUCLEOTIDE_BIOSYNTHETIC_PROCESS	0.170491
GO_POSITIVE_REGULATION_OF_EXIT_FROM_MITOSIS	0.170491
GO_NEGATIVE_REGULATION_OF_DNA_ENDOREDUPLICATION	0.170491
GO_PROTEIN_DNA_COMPLEX_DISASSEMBLY	0.170491
GO_MEIOTIC_CELL_CYCLE_CHECKPOINT	0.170491
GO_ANTERIOR_POSTERIOR_AXON_GUIDANCE	0.170491
GO_NOTCH_RECEPTOR_PROCESSING_LIGAND_DEPENDENT	0.170491
GO_NEGATIVE_REGULATION_OF_INTERLEUKIN_2_BIOSYNTHETIC_PROCESS	0.170491
GO_NEGATIVE_REGULATION_OF_CELL_VOLUME	0.170491
GO_AXON_DEVELOPMENT	0.170491
GO_POSITIVE_REGULATION_OF_THYMOCYTE_APOPTOTIC_PROCESS	0.170491
GO_DEATH_INDUCING_SIGNALING_COMPLEX_ASSEMBLY	0.170491
GO_REGULATION_OF_HEART_INDUCTION	0.170491
GO_POSITIVE_REGULATION_OF_HEXOKINASE_ACTIVITY	0.170491
GO_POSITIVE_REGULATION_OF_BLOOD_VESSEL_ENDOTHELIAL_CELL_PROLIFERATION_INVOLVED_IN_SPROUTING_ANGIOGENESIS	0.170491
GO_SCAR_COMPLEX	0.170491
GO_JUXTAPARANODE_REGION_OF_AXON	0.170491
GO_GAMMA_SECRETASE_COMPLEX	0.170491
GO_INTRINSIC_COMPONENT_OF_POSTSYNAPTIC_SPECIALIZATION_MEMBRANE	0.170491
GO_TYPE_II_TRANSFORMING_GROWTH_FACTOR_BETA_RECEPTOR_BINDING	0.170491
GO_QUATERNARY_AMMONIUM_GROUP_TRANSMEMBRANE_TRANSPORTER_ACTIVITY	0.170491
GO_OXIDOREDUCTASE_ACTIVITY_ACTING_ON_THE_ALDEHYDE_OR_OXO_GROUP_OF_DONORS_DISULFIDE_AS_ACCEPTOR	0.170491
GO_CDP_ALCOHOL_PHOSPHATIDYLTRANSFERASE_ACTIVITY	0.170491
GO_CERAMIDE_BINDING	0.170491
GO_GENERAL_TRANSCRIPTION_INITIATION_FACTOR_BINDING	0.170491
KEGG_HOMOLOGOUS_RECOMBINATION	0.177234
KEGG_VEGF_SIGNALING_PATHWAY	0.177234
KEGG_PROGESTERONE_MEDIATED_OOCYTE_MATURATION	0.177234
BIOCARTA_CCR5_PATHWAY	0.177234
PID_CASPASE_PATHWAY	0.177234
REACTOME_G_ALPHA_Q_SIGNALLING_EVENTS	0.177234
LU_TUMOR_VASCULATURE_DN	0.177234
CASORELLI_APL_SECONDARY_VS_DE_NOVO_UP	0.177234
HAHTOLA_MYCOSIS_FUNGOIDES_CD4_DN	0.177234
SCHLOSSER_MYC_TARGETS_REPRESSED_BY_SERUM	0.177234
CHEN_NEUROBLASTOMA_COPY_NUMBER_GAINS	0.177234
KLEIN_PRIMARY_EFFUSION_LYMPHOMA_UP	0.177234
ABRAHAM_ALPC_VS_MULTIPLE_MYELOMA_DN	0.177234
LEE_AGING_NEOCORTEX_DN	0.177234
GAJATE_RESPONSE_TO_TRABECTEDIN_DN	0.177234
RIGGINS_TAMOXIFEN_RESISTANCE_UP	0.177234
WEST_ADRENOCORTICAL_TUMOR_UP	0.177234
MATTHEWS_SKIN_CARCINOGENESIS_VIA_JUN	0.177234
ELLWOOD_MYC_TARGETS_UP	0.177234
ZHAN_EARLY_DIFFERENTIATION_GENES_DN	0.177234
VALK_AML_WITH_T_8_21_TRANSLOCATION	0.177234
MARSON_FOXP3_TARGETS_DN	0.177234
ZEMBUTSU_SENSITIVITY_TO_MITOMYCIN	0.177234
FIGUEROA_AML_METHYLATION_CLUSTER_5_DN	0.177234
PHONG_TNF_TARGETS_DN	0.177234
[truncated: 11,902 more rows]
