# Supplementary material for: DNAH10 mutation correlates with cisplatin sensitivity and tumor mutation burden in small-cell lung cancer
Source: Aging (Albany NY). 2020 Jan 20;12(2):1285–303. doi: 10.18632/aging.102683 (PMC7053592; doi:10.18632/aging.102683)
Supplement: Supplementary Table 8 [file aging-12-102683-s002..xlsx]

## Sheet: Etoposide
Cell_line	IC50	Mutation_Status
COLO-668	2.03282	DNAH10-WT
COR-L279	1.39088	DNAH10-WT
COR-L88	24.7188	DNAH10-MT
COR-L95	17.7924	DNAH10-WT
CPC-N	16.4547	DNAH10-WT
DMS-114	268.555	DNAH10-WT
DMS-273	0.597542	DNAH10-WT
DMS-53	72.3988	DNAH10-WT
DMS-79	22.005	DNAH10-WT
HCC-33	65.2005	DNAH10-WT
IST-SL1	10.5609	DNAH10-WT
IST-SL2	1.00787	DNAH10-MT
LB647-SCLC	1.79021	DNAH10-WT
LU-134-A	0.425777	DNAH10-WT
LU-135	0.252904	DNAH10-WT
LU-139	4.62634	DNAH10-WT
LU-165	11.2434	DNAH10-MT
MS-1	3.72214	DNAH10-WT
NCI-H1048	0.561889	DNAH10-WT
NCI-H1092	82.6264	DNAH10-WT
NCI-H1304	2.35553	DNAH10-WT
NCI-H1417	3.25754	DNAH10-WT
NCI-H1436	136.158	DNAH10-WT
NCI-H1688	10.4315	DNAH10-WT
NCI-H1694	1.51827	DNAH10-MT
NCI-H1836	39.3405	DNAH10-WT
NCI-H187	0.762584	DNAH10-MT
NCI-H1876	2.06169	DNAH10-WT
NCI-H196	106.648	DNAH10-WT
NCI-H1963	6.93424	DNAH10-WT
NCI-H2029	12.2747	DNAH10-MT
NCI-H2081	4.28395	DNAH10-WT
NCI-H209	0.98987	DNAH10-WT
NCI-H211	0.526753	DNAH10-WT
NCI-H2141	7.40473	DNAH10-WT
NCI-H2171	22.0243	DNAH10-WT
NCI-H2196	8.1503	DNAH10-MT
NCI-H2227	66.6451	DNAH10-WT
NCI-H345	208.62	DNAH10-WT
NCI-H446	42.4556	DNAH10-WT
NCI-H510A	6.9765	DNAH10-MT
NCI-H524	53.0078	DNAH10-WT
NCI-H526	0.518121	DNAH10-WT
NCI-H64	3.99859	DNAH10-MT
NCI-H69	5.41792	DNAH10-WT
NCI-H748	0.844796	DNAH10-WT
NCI-H82	46.7808	DNAH10-WT
NCI-H841	15.0795	DNAH10-WT
NCI-H847	7.27782	DNAH10-WT
SBC-1	42.9907	DNAH10-MT
SBC-3	0.277015	DNAH10-WT
SBC-5	0.367029	DNAH10-WT
SHP-77	54.9218	DNAH10-WT
SW1271	1.29684	DNAH10-MT

## Sheet: Irinotecan
Cell_line	IC50	Mutation_Status
COLO-668	4.69711	DNAH10-WT
COR-L279	0.450563	DNAH10-WT
COR-L311	2.36345	DNAH10-WT
COR-L32	2.2739	DNAH10-WT
COR-L88	45.5862	DNAH10-MT
CPC-N	27.4988	DNAH10-WT
DMS-114	67.4789	DNAH10-WT
DMS-273	10.4572	DNAH10-WT
DMS-53	6.19923	DNAH10-WT
DMS-79	1.15939	DNAH10-WT
IST-SL2	0.259867	DNAH10-MT
LU-135	9.05383	DNAH10-WT
LU-139	14.6699	DNAH10-WT
LU-165	31.3929	DNAH10-MT
MS-1	10.1703	DNAH10-WT
NCI-H1048	3.39627	DNAH10-WT
NCI-H1092	41.4236	DNAH10-WT
NCI-H1341	6.67838	DNAH10-WT
NCI-H1417	0.846558	DNAH10-WT
NCI-H1688	74.5017	DNAH10-WT
NCI-H1694	1.76345	DNAH10-MT
NCI-H1876	0.075664	DNAH10-WT
NCI-H196	3565.03	DNAH10-WT
NCI-H1963	15.1295	DNAH10-WT
NCI-H2029	50.364	DNAH10-MT
NCI-H2066	638.569	DNAH10-MT
NCI-H209	0.172981	DNAH10-WT
NCI-H211	2.12555	DNAH10-WT
NCI-H2141	43.1748	DNAH10-WT
NCI-H2227	12.6614	DNAH10-WT
NCI-H250	293.281	DNAH10-WT
NCI-H345	324.212	DNAH10-WT
NCI-H446	14.2401	DNAH10-WT
NCI-H524	11.2384	DNAH10-WT
NCI-H526	0.200513	DNAH10-WT
NCI-H64	27.5656	DNAH10-MT
NCI-H69	6.81529	DNAH10-WT
NCI-H82	5.4469	DNAH10-WT
NCI-H841	118.645	DNAH10-WT
NCI-H847	3.28183	DNAH10-WT
SBC-3	1.19109	DNAH10-WT
SBC-5	3.86258	DNAH10-WT
SHP-77	11.3565	DNAH10-WT
SW1271	18.9555	DNAH10-MT

## Sheet: Topotecan
Cell_line	IC50	Mutation_Status
COLO-668	0.340807	DNAH10-WT
COR-L311	0.548539	DNAH10-WT
CPC-N	10.6029	DNAH10-WT
DMS-114	3.92494	DNAH10-WT
DMS-273	2.31647	DNAH10-WT
DMS-53	0.313875	DNAH10-WT
DMS-79	0.061098	DNAH10-WT
IST-SL2	0.339304	DNAH10-MT
LU-135	0.618985	DNAH10-WT
LU-139	1.43137	DNAH10-WT
LU-165	5.41545	DNAH10-MT
MS-1	1.79857	DNAH10-WT
NCI-H1048	0.122992	DNAH10-WT
NCI-H1092	23.3268	DNAH10-WT
NCI-H1417	0.033677	DNAH10-WT
NCI-H1694	0.07074	DNAH10-MT
NCI-H1876	0.024314	DNAH10-WT
NCI-H196	761.086	DNAH10-WT
NCI-H1963	3.33847	DNAH10-WT
NCI-H2029	3.58921	DNAH10-MT
NCI-H209	0.023106	DNAH10-WT
NCI-H211	1.11192	DNAH10-WT
NCI-H2141	17.8413	DNAH10-WT
NCI-H2227	0.431414	DNAH10-WT
NCI-H250	4.82956	DNAH10-WT
NCI-H345	631.854	DNAH10-WT
NCI-H446	0.291842	DNAH10-WT
NCI-H524	1.64647	DNAH10-WT
NCI-H526	0.151789	DNAH10-WT
NCI-H82	0.10021	DNAH10-WT
NCI-H841	5.38895	DNAH10-WT
SBC-3	0.352411	DNAH10-WT
SBC-5	0.267152	DNAH10-WT
SHP-77	7.06468	DNAH10-WT
SW1271	2.16327	DNAH10-MT
